# Supplementary material
Source: PubMed Central journal article supplement (PMC6933537)

Supporting Information for

**A One-pot, Three-Aryne Cascade Strategy for Naphthalene  
Formation from 1,3-Diynes and 1,2-Benzdiyne Equivalents**

Xiao Xiao and Thomas R. Hoye\*

*Department of Chemistry  
University of Minnesota  
207 Pleasant St. SE  
Minneapolis, MN 55455*

\*Correspondence to: [hoye@umn.edu](mailto:hoye@umn.edu)

| <b>Table of Contents</b> |                                                                                                   | <b>page S#</b> |
|--------------------------|---------------------------------------------------------------------------------------------------|----------------|
| <b>I.</b>                | <b>General experimental protocols .....</b>                                                       | <b>S4</b>      |
| <b>II.</b>               | <b>Procedures for preparation of and characterization data for all new compounds.....</b>         | <b>S5–S33</b>  |
|                          | General procedures A–D .....                                                                      | S5             |
|                          | Reaction optimization (Table S1) .....                                                            | S6             |
|                          | Experimental details and characterization data .....                                              | S7             |
| <b>III.</b>              | <b>Computational methods and results .....</b>                                                    | <b>S34</b>     |
|                          | Figure S1. DFT-Calculated energy profiles of reactions leading to <b>27f</b> and <b>27g</b> ..... | S42            |
| <b>IV.</b>               | <b>References for Supporting Information .....</b>                                                | <b>S61</b>     |
| <b>V.</b>                | <b>Copies of <sup>1</sup>H, <sup>13</sup>C, <sup>19</sup>F NMR, and/or 2D NMR spectra .....</b>   | <b>S62</b>     |
|                          | <b>S1</b> <sup>1</sup> H .....                                                                    | <b>S63</b>     |
|                          | <b>S2</b> <sup>1</sup> H/ <sup>13</sup> C .....                                                   | <b>S64</b>     |
|                          | <b>S4</b> <sup>1</sup> H/ <sup>13</sup> C .....                                                   | <b>S66</b>     |
|                          | <b>S6</b> <sup>1</sup> H/ <sup>13</sup> C .....                                                   | <b>S68</b>     |
|                          | <b>21</b> <sup>1</sup> H/ <sup>13</sup> C .....                                                   | <b>S70</b>     |
|                          | <b>22</b> <sup>1</sup> H/ <sup>13</sup> C .....                                                   | <b>S72</b>     |
|                          | <b>23</b> <sup>1</sup> H/ <sup>13</sup> C .....                                                   | <b>S74</b>     |
|                          | <b>24</b> <sup>1</sup> H/ <sup>13</sup> C .....                                                   | <b>S76</b>     |
|                          | <b>25a</b> <sup>1</sup> H/ <sup>13</sup> C .....                                                  | <b>S78</b>     |
|                          | <b>25b</b> <sup>1</sup> H/ <sup>13</sup> C .....                                                  | <b>S80</b>     |
|                          | <b>25c</b> <sup>1</sup> H/ <sup>13</sup> C .....                                                  | <b>S82</b>     |
|                          | <b>25d</b> <sup>1</sup> H/ <sup>13</sup> C .....                                                  | <b>S84</b>     |
|                          | <b>25e</b> <sup>1</sup> H/ <sup>13</sup> C .....                                                  | <b>S86</b>     |
|                          | <b>25f</b> <sup>1</sup> H/ <sup>13</sup> C .....                                                  | <b>S88</b>     |
|                          | <b>25g</b> <sup>1</sup> H/ <sup>13</sup> C .....                                                  | <b>S90</b>     |
|                          | <b>25h</b> <sup>1</sup> H/ <sup>13</sup> C .....                                                  | <b>S92</b>     |
|                          | <b>25i</b> <sup>1</sup> H/ <sup>13</sup> C .....                                                  | <b>S94</b>     |
|                          | <b>27a</b> <sup>1</sup> H/ <sup>13</sup> C .....                                                  | <b>S96</b>     |
|                          | <b>27b</b> <sup>1</sup> H/ <sup>13</sup> C .....                                                  | <b>S98</b>     |
|                          | <b>27c</b> <sup>1</sup> H/ <sup>13</sup> C .....                                                  | <b>S100</b>    |
|                          | <b>27d</b> <sup>1</sup> H/ <sup>13</sup> C .....                                                  | <b>S102</b>    |
|                          | <b>27e</b> <sup>1</sup> H/ <sup>13</sup> C .....                                                  | <b>S104</b>    |
|                          | <b>27f</b> <sup>1</sup> H/ <sup>13</sup> C .....                                                  | <b>S106</b>    |
|                          | <b>27f'</b> <sup>1</sup> H/ <sup>13</sup> C/ <sup>19</sup> F/COSY/NOESY/HSQC/HMBC .....           | <b>S108</b>    |
|                          | <b>27g</b> <sup>1</sup> H/ <sup>13</sup> C .....                                                  | <b>S115</b>    |
|                          | <b>27h</b> <sup>1</sup> H/ <sup>13</sup> C .....                                                  | <b>S117</b>    |
|                          | <b>27h'</b> <sup>1</sup> H/ <sup>13</sup> C .....                                                 | <b>S119</b>    |
|                          | <b>27i</b> <sup>1</sup> H/ <sup>13</sup> C/HSQC/HMBC .....                                        | <b>S121</b>    |
|                          | <b>27i'</b> <sup>1</sup> H .....                                                                  | <b>S125</b>    |
|                          | <b>29</b> <sup>1</sup> H/ <sup>13</sup> C .....                                                   | <b>S126</b>    |
|                          | <b>31</b> <sup>1</sup> H/ <sup>13</sup> C .....                                                   | <b>S128</b>    |

|           |                                                                        |      |
|-----------|------------------------------------------------------------------------|------|
| <b>33</b> | $^1\text{H}/^{13}\text{C}/^{19}\text{F}$ .....                         | S130 |
| <b>35</b> | $^1\text{H}/^{13}\text{C}$ .....                                       | S133 |
| <b>38</b> | $^1\text{H}/^{13}\text{C}/^{19}\text{F}/\text{HSQC}/\text{HMBC}$ ..... | S135 |
| <b>39</b> | $^1\text{H}/^{13}\text{C}$ .....                                       | S140 |
| <b>40</b> | $^1\text{H}/^{13}\text{C}/\text{HSQC}/\text{HMBC}$ .....               | S142 |
| <b>41</b> | $^1\text{H}/^{13}\text{C}$ .....                                       | S146 |
| <b>42</b> | $^1\text{H}/^{13}\text{C}$ .....                                       | S148 |

## I. General Experimental Protocols

$^{13}\text{C}$  and  $^1\text{H}$  NMR spectra were measured on Bruker Avance 500 (500 MHz) spectrometers.  $^1\text{H}$  NMR chemical shifts for spectra recorded in  $\text{CDCl}_3$  are referenced to TMS ( $\delta = 0.00$  ppm). Non-first order multiplets are identified by the acronym "nfom". Non-first order doublets, seen often for 1,4-disubstituted benzene derivatives, are marked as "nfod".  $^{13}\text{C}$  NMR chemical shifts for spectra recorded in  $\text{CDCl}_3$  are referenced to the chemical shift of the carbon in  $\text{CDCl}_3$  ( $\delta = 77.16$  ppm).  $^{19}\text{F}$  NMR spectra are referenced to the fluorine atom in  $\text{CFCl}_3$  ( $\delta = 0.00$  ppm). Resonances in  $^1\text{H}$  spectra are given as: chemical shift in ppm ( $\delta$ ) [multiplicity, coupling constant(s) ( $J$ ) in Hz, integration, to the nearest whole number of protons, and proton assignment, given by the substructure environment, e.g.,  $\text{OCH}_a\text{H}_b$ ]. Complex structures are numbered in the graphic in order to simplify indication of the proton assignment. Coupling constant analysis was guided by methods described elsewhere by us.<sup>1,2</sup>

Infrared spectra were measured for thin films (oils) or solids with a Bruker Alpha II FT-IR spectrometer in the ATR mode (diamond window).

Most of the high-resolution mass spectrometry (HRMS) measurements were made on a Bruker BioTOF II (ESI-TOF) instrument in electrospray ionization (ESI) mode. PEG was added to the sample to serve as an internal calibrant/standard. Samples were dissolved in MeOH. A few HRMS were collected on a Thermo Orbitrap Velos (with mass accuracy  $< 3$  ppm) in the positive APCI mode against an external standard (Pierce<sup>TM</sup> LTQ). Samples were injected directly as dilute methanolic solutions (concentration less than  $10^{-6}$  M). The one low resolution measurement was made with an Advion Expression CMS instrument using APCI.

MPLC refers to medium pressure liquid chromatography, performed at ca. 50–100 psi, using columns packed with RediSep Rf Gold<sup>®</sup> Normal-Phase Silica (20–40  $\mu\text{m}$ , 60  $\text{\AA}$  pore size, Teledyne/ISCO). Elution solvent was delivered with a Waters HPLC pump; a differential refractive index detector (Waters R401) was used to detect the eluted solutes. Flash chromatography was performed with columns packed with Agela silica gel (40–63  $\mu\text{m}$ ). Thin layer chromatography was carried out on plastic-backed silica gel plates; TLC visualization was done by potassium permanganate or ceric ammonium molybdate staining and/or by UV detection.

Anhydrous reaction conditions were achieved under an atmosphere of nitrogen in flame-dried or oven-dried glassware. Commercial chlorobenzene was dried over  $\text{CaH}_2$ , distilled under reduced pressure, and stored over 4 $\text{\AA}$  molecular sieves. Commercial 18-crown-6 was recrystallized in anhydrous acetonitrile, dried *in vacuo*, and stored under inert atmosphere.<sup>3</sup> The reaction temperatures reported are the temperature of the silicone oil of an external heating bath. Reactions carried out at temperatures higher than the boiling point of the reaction solvent were performed in a screw-capped vial or culture tube that was sealed with an inert, Teflon<sup>®</sup>-lined screw cap.

## II. Procedures for preparation of and characterization data for all new compounds

### A. General procedure for the Cadiot–Chodkiewicz alkyne/alkyne cross-coupling reaction

“CuCl (0.10 equiv relative to the terminal alkyne substrate) was dissolved in a 30:70 (v:v) mixture of <sup>n</sup>BuNH<sub>2</sub>:H<sub>2</sub>O (5.0 mL/mmol relative to the terminal alkyne substrate). An excess of NH<sub>2</sub>OH·HCl (ca. 10 mg per mmol of the terminal alkyne substrate) was added with stirring. The color of this solution changed from deep blue to colorless immediately, indicating full conversion of any Cu(II) to Cu(I). The headspace of the reaction vessel was flushed with N<sub>2</sub>. The flask was closed with a septum, a balloon of nitrogen gas was attached, and the flask was cooled in an ice water bath. The terminal alkyne (1.0 equiv) in CH<sub>2</sub>Cl<sub>2</sub> (ca. 2.5 mL/mmol) was injected into the flask, resulting in a yellow, orange, or red suspension, indicative of formation of an alkynyl copper species. After ca. 5 min, a solution of the 1-bromoalkyne (1.2–1.5 equiv) in CH<sub>2</sub>Cl<sub>2</sub> (ca. 2.5 mL/mmol) was injected dropwise over ca. 15 min using a syringe pump. This reaction mixture was stirred at the indicated temperature (0 °C or rt). The suspension of the alkynyl copper would typically turn to a clear, two-layer mixture over the course of 10–100 min, indicating consumption of the alkynyl copper species. The reaction mixture was quenched by the addition of satd. aq. NH<sub>4</sub>Cl and then extracted with CH<sub>2</sub>Cl<sub>2</sub>. The combined extracts were dried, filtered, and concentrated. The residue was purified by flash chromatography on silica gel.”<sup>4</sup>

### B. General procedure for bromination of terminal or TMS-alkyne

“To a stirred solution of terminal alkyne or TMS-protected terminal alkyne (1.0 equiv) and *N*-bromosuccinimide (NBS, 1.1 equiv) in acetone (0.10 M), powdered AgNO<sub>3</sub> (0.10 equiv) was added. After being stirred at room temperature for 1–2 hours (TLC monitoring), an equal volume of hexanes was added to the suspension, and the solid succinimide was removed by filtration through Celite®. Following solvent removal from the filtrate, the crude material was purified by flash chromatography.”<sup>4</sup>

### C. General procedure for aryne reactions using precursor 4-Ts.

Anhydrous potassium carbonate, 18-crown-6, Kobayashi benzyne precursor **4-Ts**, and the diyne trapping agent were added to an oven-dried, threaded glass vial. The indicated anhydrous solvent (chlorobenzene in most cases) was added to achieve an initial poly-yne concentration of 0.020 M. The headspace of the vial was purged with a gentle flow of N<sub>2</sub> gas, and the vial was sealed with a Teflon-lined cap. The reaction solution was stirred in a heated oil bath held at the indicated temperature. After the poly-yne or benzyne precursor **4-Ts** had been consumed (TLC and direct MS analysis, typically ca. 5 hours), the vial was cooled to room temperature. The suspension was filtered through a short pad of silica (washing with hexanes/EtOAc), and the filtrate was concentrated *in vacuo*. The residue was directly subjected to MPLC for purification, using the indicated elution solvent.

### D. General procedure for aryne reactions using precursor 4-Tf.

Anhydrous potassium carbonate, 18-crown-6, and the poly-yne trapping agent were added to an oven-dried, threaded glass vial. The indicated anhydrous solvent (chlorobenzene in most cases) was added to achieve an initial poly-yne concentration of 0.020 M. The headspace of the vial was purged with a gentle flow of N<sub>2</sub> gas, and the vial was sealed with a Teflon-lined cap. The reaction solution was stirred in a heated oil bath held at the indicated temperature for 10–15 min. The Kobayashi benzyne precursor **4-Tf** was then added to the solution. After the poly-yne or benzyne precursor **4-Tf** had been consumed (TLC and direct MS analysis, typically ca. 2 hours), the vial was cooled to room temperature. The suspension was filtered through a short pad of silica (washing with hexanes/EtOAc), and the filtrate was concentrated *in vacuo*. The residue was directly subjected to MPLC for purification, using the indicated elution solvent.

### • Reaction optimization

For experimental details, see general procedures C and D. Reactions in the Table S1 were quenched when one of **21/22** or **4** was fully consumed, as indicated by direct mass spec analysis of aliquots.

We also examined CsF with substrates lacking a silyl ether. However, under the best of circumstances, the cascade reaction still only proceeded with lower efficiency (analysis of the crude NMR spectra suggested, at best, yields of  $\leq 30$ –40%). Similar observations have been reported by Li *et al.* (ref 5e in the manuscript). We also examined CsF at lower temperatures (even at rt) with the substrate TsNHCH<sub>2</sub>C≡CC≡CCH<sub>2</sub>CH<sub>2</sub>CH<sub>2</sub>Ph and observed its decomposition even under conditions where the 1,2-benzdiyne synthon was largely intact.

**Table S1. Optimization**

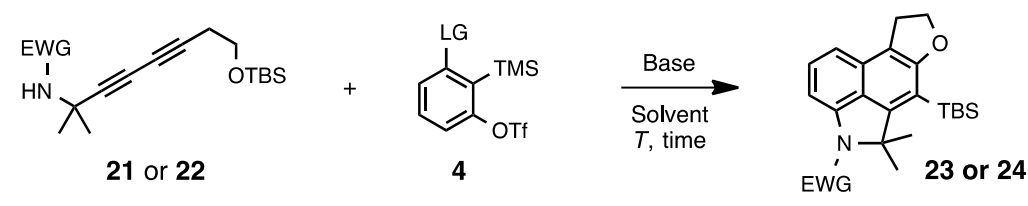

| EWG       | LG         | Base                                     | Solvent | T (°C)    | NMR Yield <sup>a</sup> of <b>23/24</b> | Conv. of <b>21/22</b>   |
|-----------|------------|------------------------------------------|---------|-----------|----------------------------------------|-------------------------|
| Ts        | OTs        | K <sub>2</sub> CO <sub>3</sub> + 18-c-6  | PhCl    | 130, 5 h  | 50%                                    | 100%                    |
| Ts        | OTs        | Cs <sub>2</sub> CO <sub>3</sub> + 18-c-6 | PhCl    | 130, 5 h  | 37%                                    | 100%                    |
| Ts        | OTs        | CsF + Cs <sub>2</sub> CO <sub>3</sub>    | MeCN    | 80, 15 h  | 20% <sup>b</sup>                       | 100%                    |
| Ts        | OTs        | K <sub>2</sub> CO <sub>3</sub> + 18-c-6  | PhCl    | 80, 24 h  | 29%                                    | 100%                    |
| Ts        | OTs        | K <sub>2</sub> CO <sub>3</sub> + 18-c-6  | MeCN    | 100, 5 h  | 42%                                    | 100%                    |
| Ts        | OTs        | K <sub>2</sub> CO <sub>3</sub> + 18-c-6  | PhMe    | 100, 15 h | 40%                                    | 100%                    |
| Ts        | <b>OTf</b> | K <sub>2</sub> CO <sub>3</sub> + 18-c-6  | PhCl    | 130, 2 h  | <b>27%</b> <sup>c</sup>                | <b>32%</b> <sup>c</sup> |
| <b>Tf</b> | OTs        | K <sub>2</sub> CO <sub>3</sub> + 18-c-6  | PhCl    | 130, 5 h  | <b>76%</b> <sup>c</sup>                | 100%                    |
| <b>Tf</b> | <b>OTf</b> | K <sub>2</sub> CO <sub>3</sub> + 18-c-6  | PhCl    | 130, 2 h  | <b>72%</b> <sup>c</sup>                | 100%                    |

Reaction conditions: **21/22** (0.050 mmol), **4** (0.10 mmol), Base (0.40 mmol), 18-c-6 (0.10 mmol), and solvent (2.5 mL). <sup>a</sup> Yields were determined by crude <sup>1</sup>H NMR analysis using *p*-nitrotoluene as an internal standard unless otherwise noted. <sup>b</sup> Yield of desilylated analog of **23**. <sup>c</sup> Isolated yields after column chromatography on silica gel.

## • Experimental details and characterization data

### *N*-(8-((*tert*-Butyldimethylsilyloxy)-2-methylocta-3,5-diyne-2-yl)-4-methylbenzenesulfonamide (**21**)

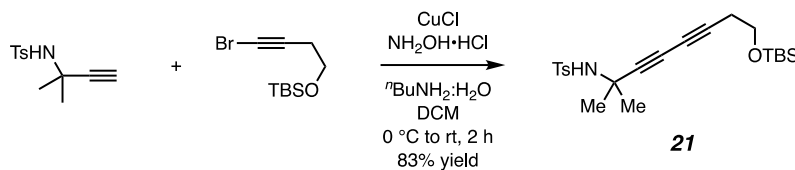

Following general procedure A, 4-methyl-*N*-(2-methylbut-3-yn-2-yl)benzenesulfonamide<sup>5</sup> (0.24 g, 1.0 mmol), [(4-bromobut-3-yn-1-yl)oxy](*tert*-butyl)dimethylsilane<sup>6</sup> (0.31 g, 1.2 mmol), CuCl (5.0 mg), *t*BuNH<sub>2</sub>:H<sub>2</sub>O (5.0 mL), and DCM (5.0 mL) were used to prepare diyne **21**. Purification of the crude material by flash chromatography (hexanes:EtOAc, 6:1) provided diyne **21** (0.35 g, 0.83 mmol, 83%) as a white crystalline solid.

<sup>1</sup>H NMR (500 MHz, CDCl<sub>3</sub>): δ 7.78 (nfod, *J* = 7.8 Hz, 2H, SO<sub>2</sub>Ar*H<sub>o</sub>*), 7.30 (nfod, *J* = 8.0 Hz, 2H, SO<sub>2</sub>Ar*H<sub>m</sub>*), 4.77 (br s, 1H, NH), 3.70 (t, *J* = 7.2 Hz, 2H, OCH<sub>2</sub>), 2.45 (t, *J* = 7.2 Hz, 2H, ≡CCH<sub>2</sub>), 2.42 (s, 3H, ArCH<sub>3</sub>), 1.53 [s, 6H, C(CH<sub>3</sub>)<sub>2</sub>], 0.90 [s, 9H, SiC(CH<sub>3</sub>)<sub>3</sub>], and 0.07 [s, 6H, Si(CH<sub>3</sub>)<sub>2</sub>].

<sup>13</sup>C NMR (126 MHz, CDCl<sub>3</sub>): δ 143.5, 138.3, 129.6, 127.8, 78.6, 76.9, 68.4, 65.4, 61.5, 50.5, 30.7, 26.0, 23.8, 21.7, 18.4, and -5.2.

IR (neat): 3259, 2929, 2857, 2251, 1599, 1383, 1327, 1366, 1145, 1093, 995, 837, and 812 cm<sup>-1</sup>.

HRMS (ESI-TOF): Calcd for C<sub>22</sub>H<sub>33</sub>NNaO<sub>3</sub>SSi<sup>+</sup> [M+Na<sup>+</sup>] requires 442.1843; found 442.1843.

m.p. 76–78 °C.

### 6-((*tert*-Butyldimethylsilyl)-5,5-dimethyl-4-tosyl-4,5,8,9-tetrahydrobenzofuro[6,5,4-cd]indole (**23**)

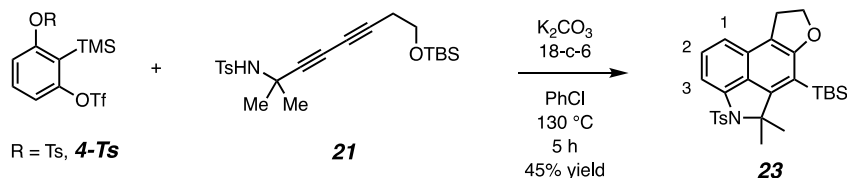

Following general procedure C, diyne **21** (21 mg, 0.050 mmol), benzyne precursor **4-Ts**<sup>7</sup> (47 mg, 0.10 mmol), K<sub>2</sub>CO<sub>3</sub> (55 mg, 0.40 mmol), 18-crown-6 (26 mg, 0.10 mmol), and chlorobenzene (2.5 mL) were used to prepare naphthalene **23**. Purification of the crude material by MPLC (hexanes:EtOAc, 15:1) provided the naphthalene derivative **23** (11 mg, 0.022 mmol, 45%) as a white crystalline solid.

**<sup>1</sup>H NMR** (500 MHz, CDCl<sub>3</sub>) δ 7.90 (nfod, *J* = 8.3 Hz, 2H, SO<sub>2</sub>Ar*H<sub>o</sub>*), 7.40 (dd, *J* = 8.0, 8.0 Hz, 1H, *H<sub>2</sub>*), 7.21 (nfod, *J* = 8.1 Hz, 2H, SO<sub>2</sub>Ar*H<sub>m</sub>*), 7.20 (d, *J* = 7.8 Hz, 1H, *H<sub>3</sub>*), 7.02 (d, *J* = 8.2 Hz, 1H, *H<sub>1</sub>*), 4.60 (t, *J* = 8.9 Hz, 2H, OCH<sub>2</sub>), 3.31 (t, *J* = 9.0 Hz, 2H, ArCH<sub>2</sub>), 2.35 (s, 3H, ArCH<sub>3</sub>), 1.98 [s, 6H, C(CH<sub>3</sub>)<sub>2</sub>], 0.90 [s, 9H, Si(CH<sub>3</sub>)<sub>3</sub>], and 0.50 [s, 6H, Si(CH<sub>3</sub>)<sub>2</sub>].

**<sup>13</sup>C NMR** (126 MHz, CDCl<sub>3</sub>) δ 166.3, 154.2, 143.8, 142.0, 139.1, 130.4, 129.64, 129.63, 127.0, 122.6, 115.3, 113.4, 112.0, 103.4, 76.8, 70.6, 30.0, 28.7, 27.8, 21.6, 18.8, and 1.2.

**IR** (neat): 2953, 2886, 2856, 1624, 1600, 1555, 1353, 1258, 1165, 1121, 1091, 983, 839, and 810 cm<sup>-1</sup>.

**HRMS** (ESI-TOF): Calcd for C<sub>28</sub>H<sub>35</sub>NNaO<sub>3</sub>SSi<sup>+</sup> [M+Na<sup>+</sup>] requires 516.1999; found 516.1987.

**m.p.** 198–202 °C.

### *N*-(4-Bromo-2-methylbut-3-yn-2-yl)-1,1,1-trifluoromethanesulfonamide (**S2**)

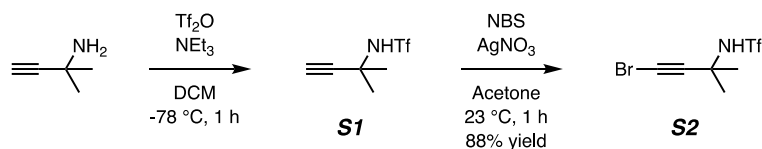

To a stirred solution of 2-methylbut-3-yn-2-amine (0.42 g, 5.0 mmol) and triethylamine (0.7 mL, 5.0 mmol) in DCM (20 mL) was added triflic anhydride (0.89 mL, 5.3 mmol) slowly at  $-78^\circ\text{C}$  under inert atmosphere. After 1 hour, the crude reaction mixture was quenched with water and extracted with EtOAc. The combined organic phase was dried and concentrated in an ambient temperature water bath under reduced pressure. The residue was directly used in further transformations without additional purification. This crude sample of sulfonamide **S1** was an 80 wt% mixture with EtOAc, as determined by <sup>1</sup>H NMR analysis.

**<sup>1</sup>H NMR** (500 MHz, CDCl<sub>3</sub>) δ 5.02 (br s, 1H, *NH*), 2.51 (s, 1H, ≡CH), and 1.71 [s, 6H, C(CH<sub>3</sub>)<sub>2</sub>].

Bromoalkyne **S2** was synthesized from sulfonamide **S1** (1.3 g, 80 wt% solution, 5.0 mmol), *N*-bromo succinimide (0.98 g, 5.5 mmol), silver nitrate (85 mg, 0.5 mmol), and acetone (50 mL) following general procedure B. Purification of the crude material using flash column chromatography (6:1 hexanes/EtOAc) afforded bromoalkyne **S2** (1.34 g, 4.5 mmol, 91%, containing 3 wt% EtOAc as indicated by <sup>1</sup>H NMR analysis, 88% corrected yield) as a pale-yellow oil, which crystallizes upon freezing.

**<sup>1</sup>H NMR** (500 MHz, CDCl<sub>3</sub>) δ 5.33 (br s, 1H, *NH*) and 1.69 [s, 6H, C(CH<sub>3</sub>)<sub>2</sub>].

**<sup>13</sup>C NMR** (126 MHz, CDCl<sub>3</sub>) δ 119.2 (q, *J* = 322 Hz), 80.7, 54.0, 45.4, and 30.7.

**IR** (neat): 3288, 2992, 2225, 1710, 1429, 1361, 1189, 1134, 996, 878, and 792 cm<sup>-1</sup>.

HRMS measurements of **S2** were not successful. HRMS using ESI or APCI conditions gave only unidentifiable fragments. The thermal instability of this compound renders it unstable to GC-



HRMS conditions. We suggest that all of the products of its subsequent derivatization serve as a means of further characterization of this relatively simple compound.

***N*-(8-((*tert*-Butyldimethylsilyl)oxy)-2-methylocta-3,5-diyn-2-yl)-1,1,1-trifluoromethanesulfonamide (**22**)**

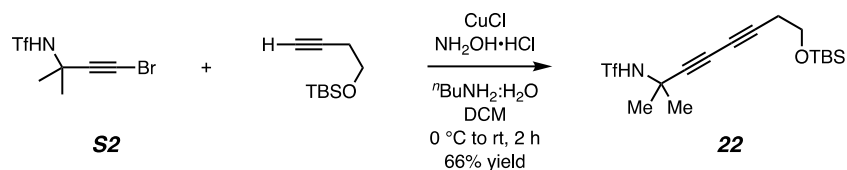

Following general procedure A, bromoalkyne **S2** (1.5 g, 5.0 mmol), (but-3-yn-1-yloxy)(*tert*-butyl)dimethylsilane (0.74 g, 4.0 mmol), CuCl (40 mg), *t*BuNH<sub>2</sub>:H<sub>2</sub>O (20 mL), and DCM (20 mL) were used to prepare diyne **22**. Purification of the crude material by flash chromatography (hexanes:EtOAc, 9:1) provided diyne **22** (1.0 g, 2.5 mmol, 66%) as a clear oil.

**<sup>1</sup>H NMR** (500 MHz, CDCl<sub>3</sub>): δ 3.74 (t, *J* = 7.0 Hz, 2H, OCH<sub>2</sub>), 2.50 (t, *J* = 7.0 Hz, 2H, ≡CCH<sub>2</sub>), 1.69 [s, 6H, C(CH<sub>3</sub>)<sub>2</sub>], 0.90 [s, 9H, SiC(CH<sub>3</sub>)<sub>3</sub>], and 0.07 [s, 6H, Si(CH<sub>3</sub>)<sub>2</sub>].

**<sup>13</sup>C NMR** (126 MHz, CDCl<sub>3</sub>): δ 119.2 (q, *J* = 321 Hz), 80.0, 75.9, 69.0, 65.1, 61.3, 53.6, 30.7, 26.0, 23.8, 18.4, and -5.2.

**IR** (neat): 3287, 2931, 2859, 2259, 1472, 1429, 1364, 1230, 1195, 1137, 1055, 998, 836, and 778 cm<sup>-1</sup>.

**HRMS** (ESI-TOF): Calcd for C<sub>16</sub>H<sub>26</sub>F<sub>3</sub>NNaO<sub>3</sub>SSi<sup>+</sup> [M+Na<sup>+</sup>] requires 420.1247; found 420.1260.

**(±)-6-(*tert*-Butyldimethylsilyl)-5,5-dimethyl-4-((trifluoromethyl)sulfonyl)-4,5,8,9-tetrahydrobenzofuro[6,5,4-cd]indole (**24**)**

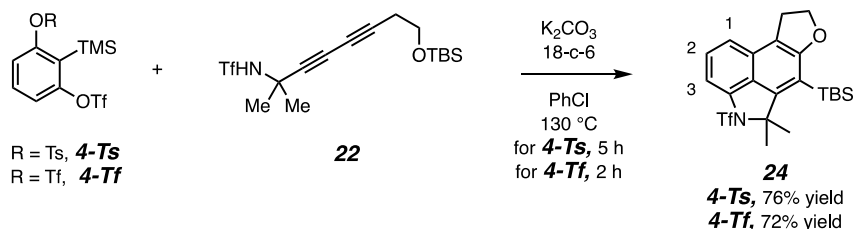

Following general procedure C, diyne **22** (20 mg, 0.050 mmol), benzyne precursor **4-Ts**<sup>7</sup> (47 mg, 0.10 mmol), K<sub>2</sub>CO<sub>3</sub> (55 mg, 0.40 mmol), 18-crown-6 (26 mg, 0.10 mmol), and chlorobenzene (2.5 mL) were used to prepare the naphthalene derivative **24**. Purification of the crude material by MPLC (hexanes:EtOAc, 20:1) gave **24** (18 mg, 0.038 mmol, 76%) as a white crystalline solid.

Alternatively, naphthalene **24** was synthesized from sulfonamide **22** (20 mg, 0.050 mmol), benzyne precursor **4-Tf**<sup>8</sup> (47 mg, 0.10 mmol), K<sub>2</sub>CO<sub>3</sub> (55 mg, 0.40 mmol), 18-crown-6 (26 mg, 0.10 mmol), and chlorobenzene (2.5 mL) following general procedure D. Purification of the

crude material using flash column chromatography (hexanes/EtOAc, 20:1) afforded naphthalene **24** (17 mg, 0.036 mmol, 72%) as a white crystalline solid.

<sup>1</sup>H NMR (500 MHz, CDCl<sub>3</sub>) δ 7.44 (dd, *J* = 7.9, 7.9 Hz, 1H, *H2*), 7.17 (d, *J* = 8.2 Hz, 1H, *H1*), 7.13 (d, *J* = 7.7 Hz, 1H, *H3*), 4.66 (dt, *J* = 9.9, 8.7 Hz, 1H, OCH<sub>a</sub>H<sub>b</sub>), 4.64 (dt, *J* = 9.9, 8.6 Hz, 1H, OCH<sub>a</sub>H<sub>b</sub>), 3.37 (dt, *J* = 15.0, 8.5 Hz, 1H, ArCH<sub>a</sub>H<sub>b</sub>), 3.36 (dt, *J* = 15.0, 8.3 Hz, 1H, ArCH<sub>a</sub>H<sub>b</sub>), 2.05 [q, *J* = 1.0 Hz, 3H, C(CH<sub>3</sub>)<sub>a</sub>], 2.03 [s, 3H, C(CH<sub>3</sub>)<sub>b</sub>], 0.93 [s, 9H, Si(CH<sub>3</sub>)<sub>3</sub>], 0.54 [s, 3H, Si(CH<sub>3</sub>)<sub>a</sub>], and 0.50 [s, 3H, Si(CH<sub>3</sub>)<sub>b</sub>].

<sup>13</sup>C NMR (126 MHz, CDCl<sub>3</sub>) δ 166.4, 152.4, 139.5, 130.0, 129.6, 122.1, 120.2 (q, *J* = 326 Hz), 115.9, 115.6, 113.2, 104.9 (q, *J* = 1.3 Hz, C3), 79.8, 70.7, 31.8, 28.6, 27.8, 27.7 (q, *J* = 2.7 Hz), 18.8, 1.6, and 0.8.

IR (neat): 2932, 2897, 2858, 1627, 1600, 1399, 1382, 1258, 1223, 1141, 987, 839, and 810 cm<sup>-1</sup>.

HRMS (ESI-TOF): Calcd for C<sub>22</sub>H<sub>28</sub>F<sub>3</sub>NNaO<sub>3</sub>SSi<sup>+</sup> [M+Na<sup>+</sup>] requires 494.1403; found 494.1417.

m.p. 153–156 °C.

**This reaction was also performed on a larger scale:** Namely, benzyne precursor **4-Ts** (1.8 g, 3.8 mmol), potassium carbonate (2.1 g, 15 mmol), and 18-crown-6 (0.98 g, 3.8 mmol) were added into an oven-dried, 55 mL threaded culture tube. The headspace of the vessel was gently flushed with N<sub>2</sub> gas while diyne **22** (1.0 g, 2.5 mmol) in 50 mL of chlorobenzene was added. The culture tube was sealed with a Teflon-lined screw-cap and heated for 5 h at 130 °C in an oil bath. Both **4-Ts** and **22** were fully consumed after 5 h, as indicated by TLC and MS analysis. The reaction mixture was filtered through a short pad of silica gel, the filtrate was concentrated *in vacuo*, and the residue was directly subjected to flash column chromatography (hexanes:EtOAc, 40:1) to afford naphthalene derivative **24** (0.79 g, 1.7 mmol, 67%) as a pale-yellow crystalline solid (see photo at right).

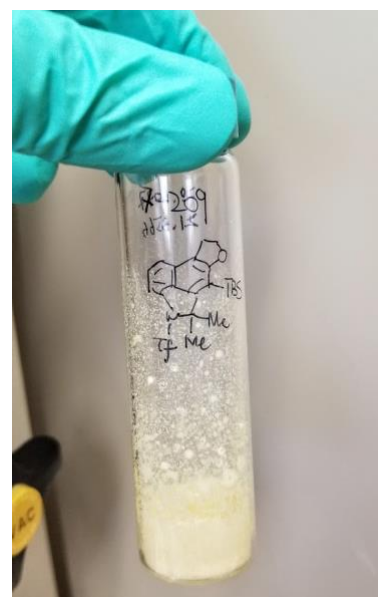

### *N*-(9-((*tert*-Butyldimethylsilyloxy)-2-methylnona-3,5-diyn-2-yl)-1,1,1-trifluoromethanesulfonamide (**25a**)

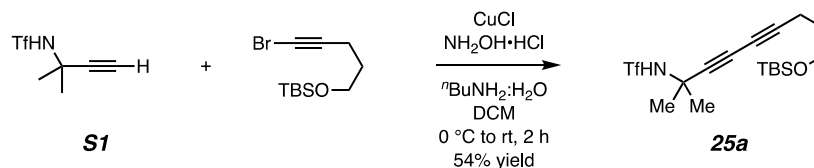

Following general procedure A, alkyne **S1** (0.13 g, 80 wt% solution, 0.48 mmol), [(5-bromopent-4-yn-1-yl)oxy](*tert*-butyl)dimethylsilane<sup>9</sup> (0.17 g, 0.61 mmol), CuCl (5.0 mg), <sup>t</sup>BuNH<sub>2</sub>:H<sub>2</sub>O (2.5



***N*-(6-(2-(((*tert*-Butyldimethylsilyl)oxy)methyl)phenyl)-2-methylhexa-3,5-diyne-2-yl)-1,1,1-trifluoromethanesulfonamide (**25b**)**

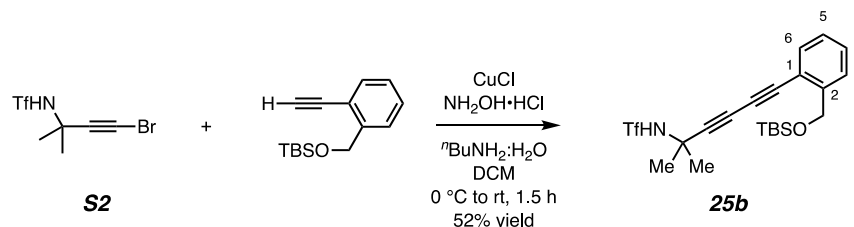

Following general procedure A, bromoalkyne **S2** (74 mg, 0.25 mmol), *tert*-butyl((2-ethynylbenzyl)oxy)dimethylsilane<sup>10</sup> (0.10 g, 0.30 mmol), CuCl (3.0 mg), *n*BuNH<sub>2</sub>:H<sub>2</sub>O (1.5 mL), and DCM (1.5 mL) were used to prepare diyne **25b**. Purification of the crude material by flash chromatography (hexanes:EtOAc, 8:1) provided diyne **25b** (60 mg, 0.13 mmol, 52%) as a pale-yellow oil.

<sup>1</sup>H NMR (500 MHz, CDCl<sub>3</sub>): δ 7.54 (d, *J* = 7.9 Hz, 1H, ArH6 or ArH3), 7.46 (dd, *J* = 7.9, 1.1 Hz, 1H, ArH3 or ArH6), 7.39 (ddd, *J* = 7.6, 7.6, 1.2 Hz, 1H, ArH4 or ArH5), 7.21 (dd, *J* = 7.6, 7.6 Hz, 1H, ArH5 or ArH4), 5.10 (br s, 1H, NH), 4.86 (s, 2H, OCH<sub>2</sub>), 1.77 [s, 6H, C(CH<sub>3</sub>)<sub>2</sub>], 0.96 [s, 9H, Si(CH<sub>3</sub>)<sub>3</sub>], and 0.13 [s, 6H, Si(CH<sub>3</sub>)<sub>2</sub>].

<sup>13</sup>C NMR (126 MHz, CDCl<sub>3</sub>): δ 145.2, 133.2, 129.9, 126.8, 126.3, 119.2 (q, *J* = 321 Hz), 118.1, 83.3, 77.4, 77.2, 68.7, 63.2, 53.8, 30.6, 26.1, 18.5, and -5.2.

IR (neat): 3288, 2955, 2931, 2858, 2240, 1429, 1365, 1256, 1198, 1139, 1084, 1000, 839, and 778 cm<sup>-1</sup>.

HRMS (ESI-TOF): Calcd for C<sub>21</sub>H<sub>28</sub>F<sub>3</sub>NNaO<sub>3</sub>SSi<sup>+</sup> [M+Na<sup>+</sup>] requires 482.1403; found 482.1411.

**(±)-6-(*tert*-Butyldimethylsilyl)-5,5-dimethyl-4-((trifluoromethyl)sulfonyl)-5,8-dihydro-4H-benzo[3,4]chromeno[7,6,5-cd]indole (**27b**)**

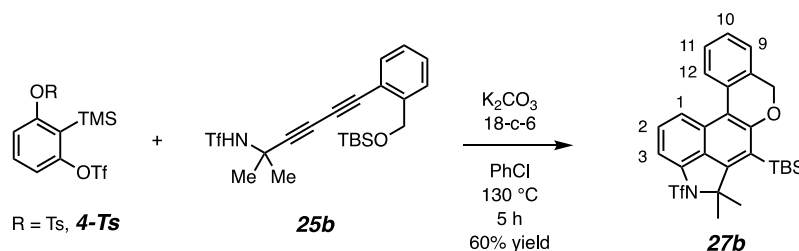

Following general procedure C, diyne **25b** (20 mg, 0.044 mmol), benzyne precursor **4-Ts**<sup>7</sup> (47 mg, 0.10 mmol), K<sub>2</sub>CO<sub>3</sub> (55 mg, 0.40 mmol), 18-crown-6 (26 mg, 0.10 mmol), and chlorobenzene (2.5 mL) were used to prepare the naphthalene derivative **27b**. Purification of the crude material by MPLC (hexanes:EtOAc, 20:1) provided **27b** (14 mg, 0.026 mmol, 60%) as a pale-yellow crystalline solid.

**$^1\text{H}$  NMR** (500 MHz,  $\text{CDCl}_3$ )  $\delta$  8.04 (d,  $J = 8.3$  Hz, 1H, *H1*), 8.03 (br d,  $J = 7.6$  Hz, 1H, *H12*), 7.53 (dd,  $J = 7.9, 7.9$  Hz, 1H, *H2*), 7.46 (ddd,  $J = 7.6, 7.6, 1.3$  Hz, 1H, *H11*), 7.36 (ddd,  $J = 7.5, 7.5, 0.9$  Hz, 1H, *H10*), 7.32 (d,  $J = 7.5, 1.0$  Hz, 1H, *H9*), 7.29 (d,  $J = 7.7$  Hz, 1H, *H3*), 4.98 (d,  $J = 12.2$  Hz, 1H,  $\text{OCH}_a\text{H}_b$ ), 4.94 (d,  $J = 12.2$  Hz, 1H,  $\text{OCH}_a\text{H}_b$ ), 2.11 [q,  $J = 1.0$  Hz, 3H,  $\text{C}(\text{CH}_3)_a$ ], 2.08 [s, 3H,  $\text{C}(\text{CH}_3)_b$ ], 1.00 [s, 9H,  $\text{Si}(\text{CH}_3)_3$ ], 0.55 [s, 3H,  $\text{Si}(\text{CH}_3)_a$ ], and 0.44 [s, 3H,  $\text{Si}(\text{CH}_3)_b$ ].

**$^{13}\text{C}$  NMR** (126 MHz,  $\text{CDCl}_3$ )  $\delta$  162.0, 153.2, 139.5, 132.9, 130.3, 130.2, 129.4, 128.4, 127.4, 126.1, 124.9, 123.0, 120.2, 120.1 (q,  $J = 326$  Hz), 117.6, 115.2, 106.4 (q,  $J = 1.3$  Hz), 79.4, 68.9, 31.8, 29.4, 27.6 (q,  $J = 2.5$  Hz), 18.8, 3.2, and 2.1.

**IR** (neat): 2996, 2933, 2857, 1621, 1577, 1462, 1401, 1382, 1255, 1225, 1203, 1144, 1022, 976, and  $815\text{ cm}^{-1}$ .

**HRMS** (ESI-TOF): Calcd for  $\text{C}_{27}\text{H}_{31}\text{F}_3\text{NO}_3\text{SSi}^+$  [ $\text{M}+\text{H}^+$ ] requires 534.1741; found 534.1751.

**m.p.** 192–196 °C.

---

### 1,1,1-Trifluoro-*N*-(8-hydroxy-2-methylocta-3,5-diyne-2-yl)methanesulfonamide (**25c**)

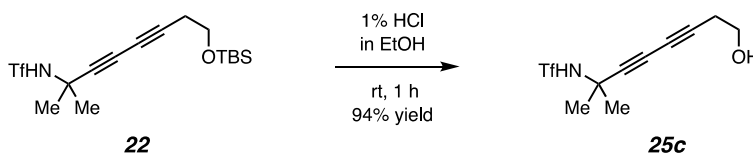

Diyne **22** (0.15 g, 0.38 mmol) was added to 4 mL of 1% aq HCl (37%) in EtOH and stirred at room temperature for 1 hour. The reaction was quenched with aqueous sodium bicarbonate solution and extracted with EtOAc. The combined organic phase was dried and concentrated. The residue was subjected to flash column chromatography (2:1 hexanes/EtOAc) to obtain alcohol **25c** (0.10 g, 0.35 mmol, 94%) as a clear oil.

**$^1\text{H}$  NMR** (500 MHz,  $\text{CDCl}_3$ ):  $\delta$  3.77 (t,  $J = 6.2$  Hz, 2H,  $\text{OCH}_2$ ), 2.58 (t,  $J = 6.2$  Hz, 2H,  $\equiv\text{CCH}_2$ ), and 1.69 [s, 6H,  $\text{C}(\text{CH}_3)_2$ ].

**$^{13}\text{C}$  NMR** (126 MHz,  $\text{CDCl}_3$ ):  $\delta$  119.2 (q,  $J = 321$  Hz), 79.2, 76.5, 68.6, 65.8, 60.7, 53.3, 30.6, and 23.7.

**IR** (neat): 3554, 3291, 2897, 2259, 1432, 1364, 1274, 1229, 1192, 1137, 1040, 1000, 845, and  $633\text{ cm}^{-1}$ .

**HRMS** (ESI-TOF): Calcd for  $\text{C}_{10}\text{H}_{12}\text{F}_3\text{NNaO}_3\text{S}^+$  [ $\text{M}+\text{Na}^+$ ] requires 306.0382; found 306.0388.

---

(±)-5,5-Dimethyl-4-((trifluoromethyl)sulfonyl)-4,5,8,9-tetrahydrobenzofuro[6,5,4-cd]indole (27c)

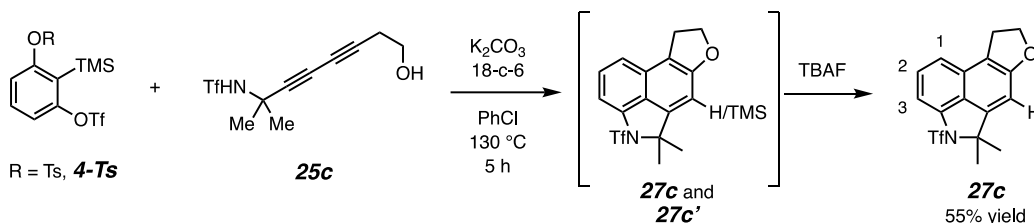

Preparation of the naphthalene derivative **27c** began with general procedure C from diene **25c** (20 mg, 0.070 mmol), benzyne precursor **4-Ts**<sup>7</sup> (63 mg, 0.14 mmol),  $K_2CO_3$  (75 mg, 0.54 mmol), 18-crown-6 (36 mg, 0.14 mmol), and chlorobenzene (3.0 mL). A mixture of **27c** and **27c'** was obtained as suggested by TLC and MS analysis. The crude reaction mixture was directly treated with TBAF (1M in THF, 0.1 mL) and stirred at ambient temperature for 5 min, which was quenched with addition of water. After extraction with EtOAc, the combined organic phase was dried and passed through a pad of silica gel. The filtrate was concentrated *in vacuo* and subjected to MPLC to provide **27c** (14 mg, 0.038 mmol, 55%) as a white crystalline solid.

<sup>1</sup>H NMR (500 MHz,  $CDCl_3$ )  $\delta$  7.46 (dd,  $J = 8.0, 8.0$  Hz, 1H, *H2*), 7.24 (d,  $J = 8.3$  Hz, 1H, *H1*), 7.14 (d,  $J = 7.6$  Hz, 1H, *H3*), 6.78 (s, 1H, Ar*H*), 4.79 (t,  $J = 8.9$  Hz, 2H, *OCH2*), 3.43 (dt,  $J = 15.1, 9.0$  Hz, 1H, Ar*CHaHb*), 3.42 (dt,  $J = 15.4, 9.1$  Hz, 1H, Ar*CHaHb*), and 1.91 [br s, 6H,  $C(CH_3)_2$ ].

<sup>13</sup>C NMR (126 MHz,  $CDCl_3$ )  $\delta$  161.0, 145.8, 140.0, 130.0, 128.9, 121.8, 120.1 (q,  $J = 326$  Hz), 117.1, 116.3, 105.5 (q,  $J = 1.2$  Hz), 102.3, 78.3, 72.6, 31.5, 28.0, and 27.1 (q,  $J = 2.7$  Hz).

IR (neat): 3003, 2978, 2907, 1632, 1594, 1402, 1378, 1221, 1198, 1153, 1122, 994, and 762  $cm^{-1}$ .

HRMS (ESI-TOF): Calcd for  $C_{16}H_{14}F_3NNaO_3S^+$  [ $M+Na^+$ ] requires 380.0539; found 380.0552.

m.p. 126–128 °C.

4-Methyl-*N*-(7-methyl-7-((trifluoromethyl)sulfonylamido)octa-3,5-diyne-1-yl)benzenesulfonamide (**25d**)

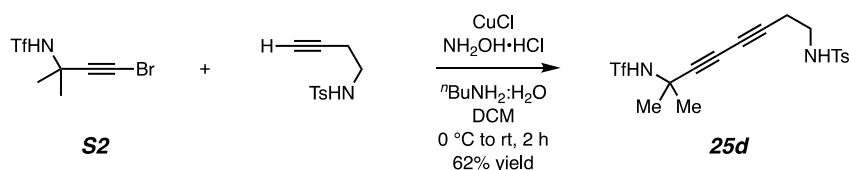

Following general procedure A, bromoalkyne **S2** (74 mg, 0.25 mmol), *N*-(but-3-yn-1-yl)-4-methylbenzenesulfonamide<sup>11</sup> (67 mg, 0.30 mmol), CuCl (3.0 mg),  $nBuNH_2 \cdot H_2O$  (1.5 mL), and DCM (1.5 mL) were used to prepare diene **25d**. Purification of the crude material by flash chromatography (hexanes:EtOAc, 3:1) provided diene **25d** (73 mg, 0.17 mmol, 67%, containing 2wt% EtOAc and 6 wt% hexanes as indicated by the <sup>1</sup>H NMR spectrum, 62% corrected yield) as a white crystalline solid.

**<sup>1</sup>H NMR** (500 MHz, CDCl<sub>3</sub>): δ 7.75 (nfod, *J* = 8.2 Hz, 2H, SO<sub>2</sub>Ar*H<sub>o</sub>*), 7.33 (nfod, *J* = 8.2 Hz, 2H, SO<sub>2</sub>Ar*H<sub>m</sub>*), 5.24 (br s, 1H, TfNH), 5.24 (t, *J* = 6.5 Hz, 1H, TsNH), 3.13 (dt, *J* = 6.5, 6.5 Hz, 2H, TsNHCH<sub>2</sub>), 2.47 (t, *J* = 6.6 Hz, 2H, ≡CCH<sub>2</sub>), 2.44 (s, 3H, ArCH<sub>3</sub>), and 1.70 [s, 6H, C(CH<sub>3</sub>)<sub>2</sub>].

**<sup>13</sup>C NMR** (126 MHz, CDCl<sub>3</sub>): δ 144.0, 136.9, 130.0, 127.2, 119.2 (q, *J* = 320 Hz), 78.3, 77.0, 68.4, 66.5, 53.4, 41.4, 30.6, 21.7, and 21.1.

**IR** (neat): 3253, 2988, 2934, 2880, 2257, 1728, 1598, 1435, 1364, 1192, 1138, 1090, 998, and 814 cm<sup>-1</sup>.

**HRMS** (ESI-TOF): Calcd for C<sub>17</sub>H<sub>19</sub>F<sub>3</sub>N<sub>2</sub>NaO<sub>4</sub>S<sub>2</sub><sup>+</sup> [M+Na<sup>+</sup>] requires 459.0631; found 459.0630.

**m.p.** 119–120 °C.

**(±)-5,5-Dimethyl-7-tosyl-4-((trifluoromethyl)sulfonyl)-5,7,8,9-tetrahydro-4H-indolo[6,5,4-cd]indole (27d)**

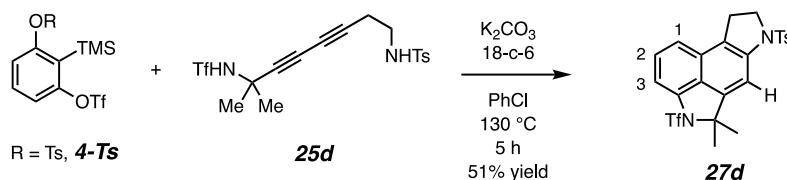

Following general procedure C, diyne **25d** (20 mg, 0.046 mmol), benzyne precursor **4-Ts**<sup>7</sup> (47 mg, 0.10 mmol), K<sub>2</sub>CO<sub>3</sub> (55 mg, 0.40 mmol), 18-crown-6 (26 mg, 0.10 mmol), and chlorobenzene (2.5 mL) were used to prepare the naphthalene derivative **27d**. Purification of the crude material by MPLC (hexanes:EtOAc, 6:1) provided **27d** (12 mg, 0.024 mmol, 51%) as a pale-yellow crystalline solid.

**<sup>1</sup>H NMR** (500 MHz, CDCl<sub>3</sub>) δ 7.69 (s, 1H, Ar*H*), 7.64 (nfod, *J* = 8.4 Hz, 2H, SO<sub>2</sub>Ar*H<sub>o</sub>*), 7.45 (dd, *J* = 7.9, 7.9 Hz, 1H, *H<sub>2</sub>*), 7.21 (nfod, *J* = 8.3 Hz, 2H, SO<sub>2</sub>Ar*H<sub>m</sub>*), 7.20 (d, *J* = 7.5 Hz, 1H, *H<sub>3</sub>*), 7.18 (d, *J* = 8.2 Hz, 1H, *H<sub>1</sub>*), 4.133 (dt, *J* = 10.7, 8.9 Hz, 1H, TsNCH<sub>a</sub>H<sub>b</sub>), 4.129 (dt, *J* = 10.8, 8.8 Hz, 1H, TsNCH<sub>a</sub>H<sub>b</sub>), 3.12 (dt, *J* = 16.0, 8.6 Hz, 1H, ArCH<sub>a</sub>H<sub>b</sub>), 3.11 (dt, *J* = 16.0, 8.6 Hz, 1H, ArCH<sub>a</sub>H<sub>b</sub>), 2.35 (s, 3H, ArCH<sub>3</sub>), 1.973 [q, *J* = 1.0 Hz, 3H, C(CH<sub>3</sub>)<sub>a</sub>], and 1.968 [s, 3H, C(CH<sub>3</sub>)<sub>b</sub>].

**<sup>13</sup>C NMR** (126 MHz, CDCl<sub>3</sub>) δ 145.5, 144.6, 142.7, 140.0, 133.8, 130.2, 129.9, 128.3, 127.4, 124.1, 123.5, 120.0 (q, *J* = 325 Hz), 116.6, 107.1 (q, *J* = 1.3 Hz), 106.2, 78.7, 51.0, 31.5, 27.1 (q, *J* = 2.4 Hz), 26.0, and 21.7.

**IR** (neat): 3006, 2933, 2861, 1735, 1632, 1596, 1402, 1354, 1292, 1199, 1165, 1139, 1015, 814, and 763 cm<sup>-1</sup>.

**HRMS** (ESI-TOF): Calcd for C<sub>23</sub>H<sub>21</sub>F<sub>3</sub>N<sub>2</sub>NaO<sub>4</sub>S<sub>2</sub><sup>+</sup> [M+Na<sup>+</sup>] requires 533.0787; found 533.0789.

**m.p.** 183–188 °C.

**1,1,1-Trifluoro-*N*-(2-methyl-9-phenylnona-3,5-diyne-2-yl)methanesulfonamide (25e)**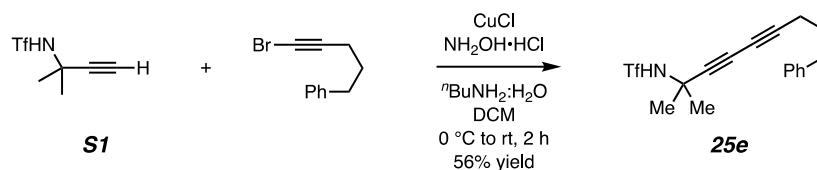

Following general procedure A, alkyne **S1** (0.13 g, 80 wt% solution, 0.48 mmol), (5-bromopent-4-yn-1-yl)benzene<sup>12</sup> (0.16 g, 0.72 mmol), CuCl (5.0 mg), <sup>n</sup>BuNH<sub>2</sub>:H<sub>2</sub>O (2.5 mL), and DCM (2.5 mL) were used to prepare diyne **25e**. Purification of the crude material by flash chromatography (hexanes:EtOAc, 20:1) provided diyne **25e** (0.10 g, 0.28 mmol, 56%) as a pale-yellow solid.

<sup>1</sup>H NMR (500 MHz, CDCl<sub>3</sub>): δ 7.31–7.26 (nfom, 2H, PhH<sub>o</sub>), 7.22–7.16 (m, 3H, PhH<sub>m+p</sub>), 5.12 (br s, 1H, NH), 2.72 (t, *J* = 7.5 Hz, 2H, PhCH<sub>2</sub>), 2.29 (t, *J* = 7.1 Hz, 2H, ≡CCH<sub>2</sub>), 1.86 (tt, *J* = 7.2, 7.2 Hz, 2H, CH<sub>2</sub>CH<sub>2</sub>CH<sub>2</sub>), and 1.70 [s, 6H, C(CH<sub>3</sub>)<sub>2</sub>].

<sup>13</sup>C NMR (126 MHz, CDCl<sub>3</sub>): δ 141.2, 128.6, 128.6, 126.2, 119.2 (q, *J* = 321 Hz), 82.5, 75.8, 69.1, 64.6, 53.6, 34.8, 30.7, 29.7, and 18.8.

IR (neat): 3291, 2998, 2944, 2859, 2256, 1426, 1363, 1192, 1133, 994, 943, 871, and 732 cm<sup>-1</sup>.

HRMS (ESI-TOF): Calcd for C<sub>17</sub>H<sub>18</sub>F<sub>3</sub>NNaO<sub>2</sub>S<sup>+</sup> [M+Na<sup>+</sup>] requires 380.0903; found 380.0916.

m.p. 43–45 °C.

**(±)-1,1-Dimethyl-2-((trifluoromethyl)sulfonyl)-2,7,8,11-tetrahydro-1H,6H-8a,11-ethenophenaleno[1,2,3-cd]indole (27e)**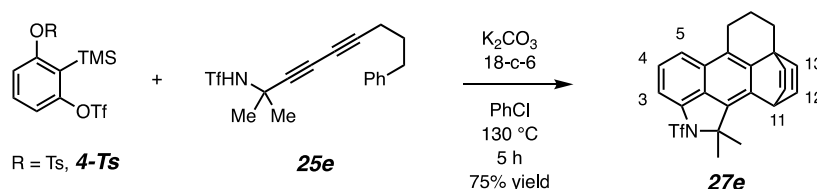

Following general procedure C, diyne **25e** (20 mg, 0.056 mmol), benzyne precursor **4-Ts**<sup>7</sup> (52 mg, 0.11 mmol), K<sub>2</sub>CO<sub>3</sub> (62 mg, 0.45 mmol), 18-crown-6 (29 mg, 0.11 mmol), and chlorobenzene (2.5 mL) were used to prepare the naphthalene derivative **27e**. Purification of the crude material by MPLC (hexanes:EtOAc, 20:1) provided **27e** (18 mg, 0.042 mmol, 75%) as a pale-yellow crystalline solid.

<sup>1</sup>H NMR (500 MHz, CDCl<sub>3</sub>) δ 7.42 (dd, *J* = 8.3, 1.1 Hz, 1H, H<sub>5</sub>), 7.39 (dd, *J* = 8.2, 8.2 Hz, 1H, H<sub>4</sub>), 7.26 (d, *J* = 7.7 Hz, 1H, H<sub>3</sub>), 6.84 (dd, *J* = 8.7, 6.3 Hz, 1H, H<sub>12a</sub>), 6.83 (dd, *J* = 8.7, 6.3 Hz, 1H, H<sub>12b</sub>), 6.67 (dd, *J* = 6.8, 1.3 Hz, 1H, H<sub>13a</sub>), 6.66 (dd, *J* = 7.0, 1.2 Hz, 1H, H<sub>13b</sub>), 5.14 (dddd, *J* = 6.0, 6.0, 1.5, 1.5 Hz, 1H, H<sub>11</sub>), 2.98 (dt, *J* = 16.6, 6.0 Hz, 1H, ArCH<sub>a</sub>H<sub>b</sub>), 2.96 (dt, *J* = 16.4, 6.0 Hz, 1H, ArCH<sub>a</sub>H<sub>b</sub>), 2.54 (dt, *J* = 13.5, 5.4 Hz, 1H, CCH<sub>a</sub>H<sub>b</sub>), 2.53 (dt, *J* = 13.5, 5.3 Hz, 1H,



CCH<sub>a</sub>H<sub>b</sub>), 2.08 [q, *J* = 1.0 Hz, 3H, C(CH<sub>3</sub>)<sub>a</sub>], 2.07–2.01 (m, 2H, CH<sub>2</sub>CH<sub>2</sub>CH<sub>2</sub>), and 2.04 [s, 3H, C(CH<sub>3</sub>)<sub>b</sub>].

<sup>13</sup>C NMR (126 MHz, CDCl<sub>3</sub>) δ 145.4 (x2), 144.4, 139.0, 138.40, 138.38, 135.4, 132.2, 128.1, 127.7, 127.1, 123.2, 120.1 (q, *J* = 328 Hz), 116.8, 108.2 (q, *J* = 1.3 Hz), 78.3, 51.3, 43.9, 31.7, 30.6, 26.5 (q, *J* = 2.6 Hz), 24.5, and 21.1.

IR (neat): 3000, 2932, 2860, 1609, 1502, 1444, 1402, 1255, 1220, 1144, 978, 957, and 849 cm<sup>-1</sup>.

HRMS (ESI-TOF): Calcd for C<sub>23</sub>H<sub>20</sub>F<sub>3</sub>NNaO<sub>2</sub>S<sup>+</sup> [M+Na<sup>+</sup>] requires 454.1059; found 454.1045.

m.p. 186–190 °C.

***N*-(7-(3,5-Dimethylphenoxy)-2-methylhepta-3,5-diyne-2-yl)-1,1,1-trifluoromethanesulfonamide (25f)**

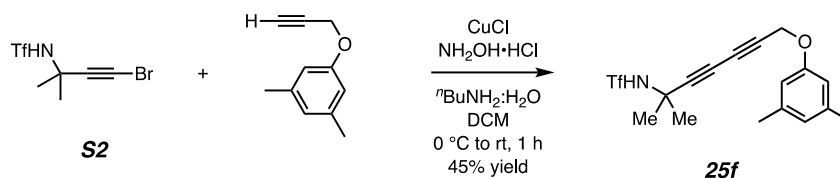

Following general procedure A, bromoalkyne **S2** (0.78 g, 2.6 mmol), 1-ethynyl-2-methoxyphthalene<sup>13</sup> (0.60 g, 3.8 mmol), CuCl (10 mg), *n*BuNH<sub>2</sub>·H<sub>2</sub>O (15 mL), and DCM (15 mL) were used to prepare diyne **25f**. Purification of the crude material by flash chromatography (hexanes:EtOAc, 6:1 to 3:1) provided diyne **25f** (0.44 g, 1.2 mmol, 45%) as a light brown oil.

<sup>1</sup>H NMR (500 MHz, CDCl<sub>3</sub>): δ 6.66 (s, 1H, ArH<sub>p</sub>), 6.57 (s, 2H, ArH<sub>o</sub>), 4.95 (br s, 1H, TfNH), 4.72 (s, 2H, OCH<sub>2</sub>), 2.30 (s, 6H, ArCH<sub>3</sub>), and 1.70 [s, 6H, C(CH<sub>3</sub>)<sub>2</sub>].

<sup>13</sup>C NMR (126 MHz, CDCl<sub>3</sub>): δ 157.6, 139.5, 123.7, 119.2 (q, *J* = 321 Hz), 112.7, 79.6, 70.5, 68.1, 56.2, 53.4, 30.5, and 21.6.

IR (neat): 3299, 2992, 2918, 2859, 2256, 1614, 1594, 1430, 1362, 1293, 1197, 1150, 1062, 998, and 828 cm<sup>-1</sup>.

HRMS (ESI-TOF): Calcd for C<sub>17</sub>H<sub>18</sub>F<sub>3</sub>NNaO<sub>3</sub>S<sup>+</sup> [M+Na<sup>+</sup>] requires 396.0852; found 396.0862.

**(±)-5,5,7,9-Tetramethyl-4-((trifluoromethyl)sulfonyl)-5,12-dihydro-4H-benzo[3,4]isochromeno[6,7,8-cd]indole (27f)**

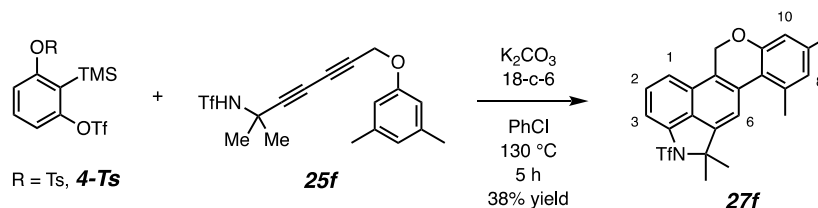

Following general procedure C, diyne **25f** (19 mg, 0.051 mmol), benzyne precursor **4-Ts**<sup>7</sup> (47 mg, 0.10 mmol), K<sub>2</sub>CO<sub>3</sub> (55 mg, 0.40 mmol), 18-crown-6 (26 mg, 0.10 mmol), and chlorobenzene (2.5 mL) were used to prepare the naphthalene derivative **27f**. Purification of the crude material by MPLC (hexanes:EtOAc, 20:1) provided **27f** (8.6 mg, 0.019 mmol, 38%) as a white crystalline solid.

<sup>1</sup>H NMR (500 MHz, CDCl<sub>3</sub>) δ 7.57–7.52 (m, 2H, *H1* and *H2*), 7.54 (s, 1H, *H6*), 7.35–7.30 (mfom, 1H, *H3*), 6.84 (s, 1H, *H8* or *H10*), 6.81 (s, 1H, *H8* or *H10*), 5.35 (d, *J* = 13.0 Hz, 1H, OCH<sub>a</sub>H<sub>b</sub>), 5.30 (d, *J* = 13.0 Hz, 1H, OCH<sub>a</sub>H<sub>b</sub>), 2.69 (s, 3H, C7CH<sub>3</sub>), 2.35 (s, 3H, C9CH<sub>3</sub>), 1.98 [q, *J* = 1.0 Hz, 3H, C(CH<sub>3</sub>)<sub>a</sub>], and 1.97 [s, 3H, C(CH<sub>3</sub>)<sub>b</sub>].

<sup>13</sup>C NMR (126 MHz, CDCl<sub>3</sub>) δ 156.5, 143.8, 139.8, 139.7, 135.0, 131.6, 129.8, 127.6, 127.0, 126.8, 124.8, 121.5, 120.1 (q, *J* = 325 Hz), 116.5, 115.5, 114.3, 108.1 (q, *J* = 1.2 Hz), 78.9, 64.9, 31.6, 27.2 (q, *J* = 2.5 Hz), 22.7, and 21.4.

IR (neat): 2976, 2926, 2853, 1614, 1453, 1386, 1223, 1200, 1141, 1029, and 843 cm<sup>-1</sup>.

HRMS (ESI-TOF): Calcd for C<sub>23</sub>H<sub>20</sub>F<sub>3</sub>NNaO<sub>3</sub>S<sup>+</sup> [M+Na<sup>+</sup>] requires 470.1008; found 470.1015.

m.p. 199–203 °C.

**27f and (±)-11,11,13,15-Tetramethyl-10-((trifluoromethyl)sulfonyl)-6,10,11,14-tetrahydro-4b,14-ethenonaphtho[1',2':3,4]isochromeno[6,7,8-cd]indol-4-yl Trifluoromethanesulfonate (27f')**

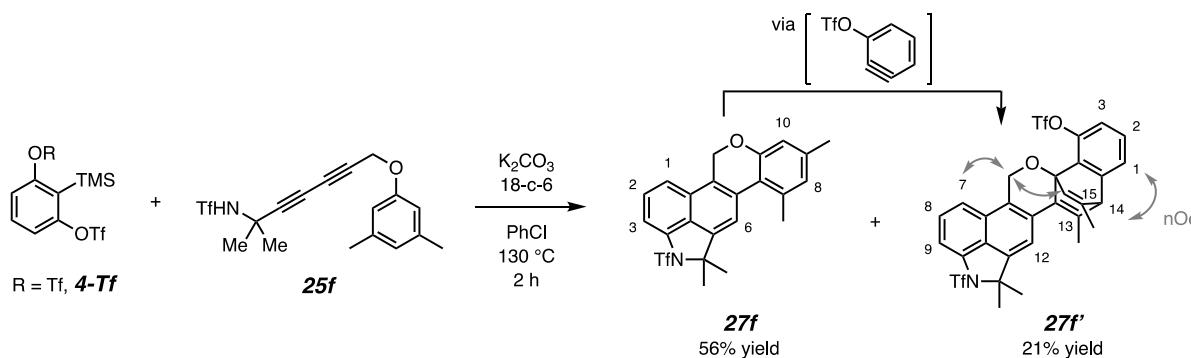

Alternatively, naphthalene derivatives **27f** and **27f'** were prepared from benzyne precursor **4-Tf**<sup>8</sup> (45 mg, 0.10 mmol), diyne **25f** (18 mg, 0.048 mmol), K<sub>2</sub>CO<sub>3</sub> (55 mg, 0.40 mmol), 18-crown-6 (26 mg, 0.10 mmol), and chlorobenzene (2.5 mL) following general procedure D. Purification of the crude material by MPLC (hexanes:EtOAc, 30:1 to 10:1) afforded, in the order of elution, **27f** (12.0 mg, 0.027 mmol, 56%) as a white crystalline solid and the naphthalene derivative **27f'** (6.7 mg, 0.010 mmol, 21%) as a yellow crystalline solid.

**Data for 27f'**

The regiochemistry is assigned primarily by the nOe correlation as indicated on the structure. This compound exists as a 1:1 pair of diastereoisomers in the NMR time scale because of slow

inversion of the nitrogen center. This is reflected in the four resonances of very similar intensity in the  $^{19}\text{F}$  spectrum as well as the C6-methylene protons in the  $^1\text{H}$  spectrum.

**$^1\text{H}$  NMR** (500 MHz,  $\text{CDCl}_3$ )  $\delta$  7.56 (dd,  $J = 8.4$  Hz, 1H,  $H7$ ), 7.53 (dd,  $J = 8.5, 7.4$  Hz, 1H,  $H8$ ), 7.31 (d,  $J = 7.4$  Hz, 1H,  $H9$ ), 7.23 (d,  $J = 7.2$  Hz, 1H,  $H1$ ), 7.11 (s, 1H,  $H12$ ), 7.01 (dd,  $J = 8.2, 7.2$  Hz, 1H,  $H2$ ), 6.81 (d,  $J = 8.3$  Hz, 1H,  $H3$ ), 6.53 (dq,  $J = 1.8, 1.8$  Hz, 1H, alkenyl- $H$ ), 5.40 (d,  $J = 14.4$  Hz, 0.5H, diastereomer A,  $\text{OCH}_a\text{H}_b$ ), 5.39 (d,  $J = 14.4$  Hz, 0.5H, diastereomer B,  $\text{OCH}_a\text{H}_b$ ), 5.33 (d,  $J = 14.4$  Hz, 0.5H, diastereomer A,  $\text{OCH}_a\text{H}_b$ ), 5.31 (d,  $J = 14.4$  Hz, 0.5H, diastereomer B,  $\text{OCH}_a\text{H}_b$ ), 4.36 (d,  $J = 1.8$  Hz, 1H,  $H14$ ), 2.38 (s, 3H,  $\text{C13-CH}_3$ ), 1.98 (d,  $J = 1.7$  Hz, 3H,  $\text{C15-CH}_3$ ), 1.92 [q,  $J = 1.0$  Hz, 3H,  $\text{C}(\text{CH}_3)_a$ ], and 1.88 [s, 3H,  $\text{C}(\text{CH}_3)_b$ ].

**$^{13}\text{C}$  NMR** (126 MHz,  $\text{CDCl}_3$ )  $\delta$  [148.95 (diastereomer A), 148.90 (diastereomer B)], 148.88, 143.5, [143.16 (A), 143.14 (B)], 139.7, [138.13 (A), 138.08 (B)], 134.1, 131.3, 130.3, 129.7, 129.4, 127.9, 126.0, 124.4, 121.6, 120.1 (q,  $J = 325$  Hz), 119.0 (q,  $J = 319$  Hz), 118.6, 117.7, 116.7, 114.2, 108.3, 87.9, 78.7, 62.8, [61.75 (A), 61.73 (B)], [31.7 (A), 31.5 (B)], [27.2 (q,  $J = 2.5$  Hz, A), 27.1 (q,  $J = 2.6$  Hz, B)], [20.10 (A), 20.07 (B)], and 19.6.

**$^{19}\text{F}$  NMR** (471 MHz,  $\text{CDCl}_3$ )  $\delta$  [-73.81 (A), -73.83 (B)], and [-74.29 (A), -74.30 (B)].

**IR** (neat): 2977, 2943, 2933, 1759, 1611, 1424, 1404, 1384, 1246, 1229, 1203, 1143, 1061, and  $852\text{ cm}^{-1}$ .

**HRMS** (ESI-TOF): Calcd for  $\text{C}_{30}\text{H}_{23}\text{F}_6\text{NNaO}_6\text{S}_2^+$  [ $\text{M}+\text{Na}^+$ ] requires 694.0763; found 694.0765.

**m.p.** 136–140 °C.

### 1-((4-Bromo-2-methylbut-3-yn-2-yl)oxy)-3,5-dimethylbenzene (**S4**)

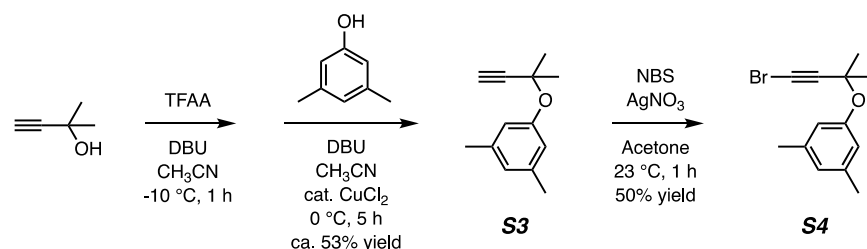

Alkyne **S3** was synthesized following a reported procedure<sup>14</sup>: To a solution of 2-methylbut-3-yn-2-ol (1.3 g, 16 mmol) in anhydrous acetonitrile (25 mL) under nitrogen at ca.  $-10$  °C was added DBU (2.9 mL, 20 mmol). Trifluoroacetic anhydride (2.1 mL, 15 mmol) was added over 15 min while carefully keeping the temperature below  $-10$  °C. The resulting solution was stirred at  $0$  °C for 45 min before the addition of the trifluoroacetate ester to the solution of 3,5,-dimethylphenol as described below.

3,5-Dimethylphenol (1.6 g, 13 mmol) was dissolved in anhydrous acetonitrile (25 mL) under nitrogen and cooled to below  $-10$  °C. DBU (2.9 mL, 20 mmol) and  $\text{CuCl}_2$  (15 mg) were added. The above described trifluoroacetate solution was added to the 3,5-dimethylphenol solution over 20 min, while maintaining the temperature below  $0$  °C. After being stirred for 5 h at  $0$  °C, the

mixture was poured into 30 mL of saturated  $\text{NH}_4\text{Cl}$  aqueous solution. The mixture was extracted with EtOAc, dried, and concentrated. The residue was redissolved in hexanes/EtOAc (40:1) and passed through a short silica plug, eluting with additional hexanes/EtOAc (40:1). The filtrate was concentrated and the crude material (1.3 g, ca. 6.9 mmol, 53%) was used for the next step without further purification.

Bromoalkyne **S4** was prepared from crude **S3** (0.94 g, ca. 5.0 mmol), NBS (1.0 g, 5.5 mmol),  $\text{AgNO}_3$  (70 mg, 0.5 mmol), and acetone (50 mL) following general procedure B. Purification of the crude mixture by flash column chromatography (hexanes:EtOAc, 50:1) afforded bromoalkyne **S4** (0.67 g, 2.5 mmol, 50%) as a clear oil.

$^1\text{H NMR}$  (500 MHz,  $\text{CDCl}_3$ )  $\delta$  6.78 (s, 2H,  $\text{ArH}_o$ ), 6.71 (s, 1H,  $\text{ArH}_p$ ), 2.29 (s, 6H,  $\text{ArCH}_3$ ), and 1.60 [s, 6H,  $\text{C}(\text{CH}_3)_2$ ].

$^{13}\text{C NMR}$  (126 MHz,  $\text{CDCl}_3$ )  $\delta$  155.4, 138.7, 124.9, 119.5, 82.7, 73.4, 46.0, 29.6, and 21.5.

**IR** (neat): 2984, 2935, 2226, 1758, 1610, 1594, 1467, 1380, 1300, 1240, 1135, 1048, and 850  $\text{cm}^{-1}$ .

**LRMS** (GCMS-EI,  $t_R = 6.95$  min): Calcd for  $\text{C}_{13}\text{H}_{15}^{79}\text{BrO}^+$  [ $\text{M}^+$ ] requires 266.0301; found 266.1, and Calcd for  $\text{C}_{13}\text{H}_{15}^{81}\text{BrO}^+$  [ $\text{M}^+$ ] requires 268.0280, found 268.0. **HRMS** measurements were not successful.

***N*-(7-(3,5-Dimethylphenoxy)-2,7-dimethylocta-3,5-diyn-2-yl)-1,1,1-trifluoromethanesulfonamide (25g)**

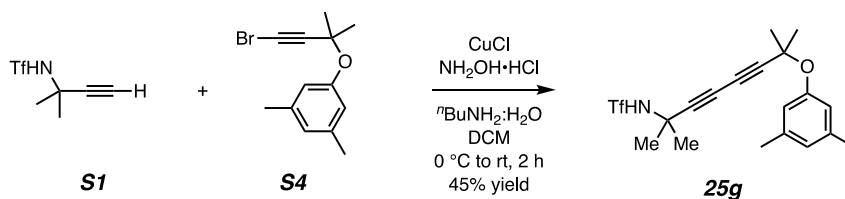

Following general procedure A, alkyne **S1** (0.54 g, 80 wt% solution, 2.0 mmol), bromoalkyne **S4** (0.67 g, 2.5 mmol), CuCl (20 mg),  $^n\text{BuNH}_2\cdot\text{H}_2\text{O}$  (10 mL), and DCM (10 mL) were used to prepare diyne **25g**. Purification of the crude material by flash chromatography (hexanes:EtOAc, 10:1) provided the diyne **25g** (0.37 g, 0.92 mmol, 46%, containing 2 wt% EtOAc as suggested by its  $^1\text{H NMR}$  spectrum, 45% corrected yield) as a yellowish oil.

$^1\text{H NMR}$  (500 MHz,  $\text{CDCl}_3$ ):  $\delta$  6.78 (s, 2H,  $\text{ArH}_o$ ), 6.72 (s, 1H,  $\text{ArH}_p$ ), 5.10 (br s, 1H,  $\text{TfNH}$ ), 2.29 (s, 6H,  $\text{ArCH}_3$ ), 1.70 [s, 6H,  $\text{C}(\text{CH}_3)_2$ ], and 1.62 [s, 6H,  $\text{C}(\text{CH}_3)_2$ ].

$^{13}\text{C NMR}$  (126 MHz,  $\text{CDCl}_3$ ):  $\delta$  155.2, 138.8, 125.1, 119.4, 119.2 (q,  $J = 321$  Hz), 83.0, 80.0, 72.7, 69.2, 68.1, 53.5, 30.6, 29.4, and 21.5.

**IR** (neat): 3287, 2989, 2923, 2870, 2250, 1610, 1592, 1430, 1364, 1191, 1133, 995, and 860  $\text{cm}^{-1}$ .

**HRMS** (ESI-TOF): Calcd for  $\text{C}_{19}\text{H}_{22}\text{F}_3\text{NNaO}_3\text{S}^+$  [ $\text{M}+\text{Na}^+$ ] requires 424.1165; found 424.1161.

(±)-1,1,4,6,6,11-Hexamethyl-7-((trifluoromethyl)sulfonyl)-6,7-dihydro-1H,5H-2a,5-ethenofuro[4',3',2':4,5]naphtho[1,2,3-cd]indole (**27g**)

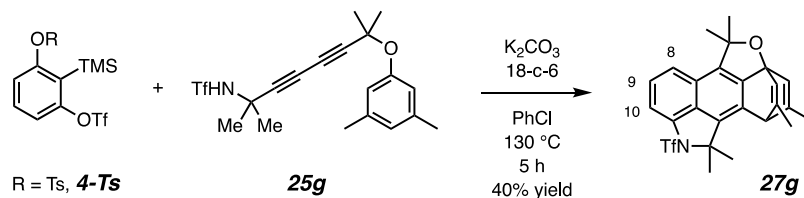

Following general procedure C, diyne **25g** (23 mg, 0.057 mmol), benzyne precursor **4-Ts**<sup>7</sup> (54 mg, 0.12 mmol), K<sub>2</sub>CO<sub>3</sub> (55 mg, 0.40 mmol), 18-crown-6 (26 mg, 0.10 mmol), and chlorobenzene (2.5 mL) were used to prepare the naphthalene derivative **27g**. Purification of the crude material by MPLC (hexanes:EtOAc, 20:1) provided **27g** (11 mg, 0.023 mmol, 40%) as a yellow crystalline solid.

**<sup>1</sup>H NMR** (500 MHz, CDCl<sub>3</sub>)  $\delta$  7.43 (dd,  $J = 8.1, 8.1$  Hz, 1H, *H9*), 7.32 (d,  $J = 8.2$  Hz, 1H, *H8*), 7.28 (d,  $J = 7.7$  Hz, 1H, *H10*), 6.54 (dq,  $J = 1.5, 1.5$  Hz, 2H, alkenyl-*H*), 4.42 (t,  $J = 1.6$  Hz, 1H, bridgehead-*H*), 2.06 [br s, 3H, C(CH<sub>3</sub>)<sub>a</sub>], 2.03 [s, 3H, C(CH<sub>3</sub>)<sub>b</sub>], 1.91 [d,  $J = 1.6$  Hz, 6H, alkenyl-CH<sub>3</sub>], and 1.81 [br s, 6H, C(CH<sub>3</sub>)<sub>2</sub>].

**<sup>13</sup>C NMR** (126 MHz, CDCl<sub>3</sub>)  $\delta$  151.8, 144.49, 144.46, 140.3, 137.60, 137.55, 135.9, 129.0, 128.3, 127.7, 125.9, 124.4, 120.1 (q,  $J = 326$  Hz), 116.3, 108.0 (q,  $J = 1.4$  Hz), 93.7, 92.8, 76.5, 55.5, 31.5, 29.27, 29.25, 27.2 (q,  $J = 2.5$  Hz), 19.32, and 19.28 (all diastereotopic carbon signals are resolved).

**IR** (neat): 2971, 2931, 2857, 1758, 1605, 1461, 1408, 1384, 1252, 1201, 1148, 1056, and 967 cm<sup>-1</sup>.

**HRMS** (ESI-TOF): Calcd for C<sub>25</sub>H<sub>24</sub>F<sub>3</sub>NNaO<sub>3</sub>S<sup>+</sup> [M+Na<sup>+</sup>] requires 498.1321; found 498.1325.

**m.p.** 88–92 °C.

1,1,1-Trifluoro-*N*-(6-(2-methoxyphenyl)-2-methylhexa-3,5-diyne-2-yl)methanesulfonamide (**25h**)

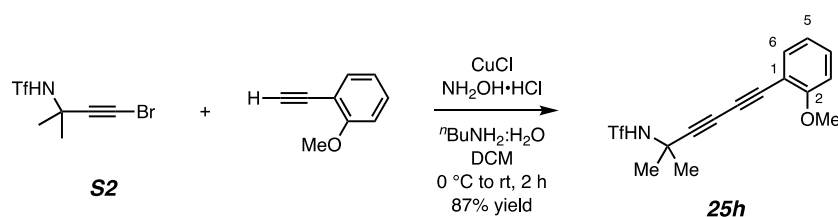

Following general procedure A, bromoalkyne **S2** (0.15 g, 0.50 mmol), 1-ethynyl-2-methoxybenzene (0.10 g, 0.76 mmol), CuCl (5.0 mg), <sup>t</sup>BuNH<sub>2</sub>:H<sub>2</sub>O (2.5 mL), and DCM (2.5 mL)

were used to prepare diyne **25h**. Purification of the crude material by flash chromatography (hexanes:EtOAc, 6:1) provided diyne **25h** (0.15 g, 0.44 mmol, 87%) as a yellow crystalline solid.

**<sup>1</sup>H NMR** (500 MHz, CDCl<sub>3</sub>): δ 7.45 (dd, *J* = 7.6, 1.7 Hz, 1H, *H6*), 7.34 (ddd, *J* = 8.4, 7.6, 1.7 Hz, 1H, *H4*), 6.91 (ddd, *J* = 7.6, 7.6, 0.9 Hz, 1H, *H5*), 6.88 (d, *J* = 8.5 Hz, 1H, *H3*), 5.14 (br s, 1H, TfNH), 3.89 (s, 3H, OCH<sub>3</sub>), and 1.75 [s, 6H, C(CH<sub>3</sub>)<sub>2</sub>].

**<sup>13</sup>C NMR** (126 MHz, CDCl<sub>3</sub>): δ 161.7, 134.7, 131.2, 120.7, 119.2 (q, *J* = 321 Hz), 110.8, 110.5, 82.9, 76.49 (q, *J* = 2.4 Hz), 76.45 (q, *J* = 1.3 Hz), 69.0, 56.0, 53.9, and 30.6.

**IR** (neat): 3290, 2992, 2943, 2840, 2239, 1595, 1493, 1434, 1364, 1279, 1198, 1138, 997, and 753 cm<sup>-1</sup>.

**HRMS** (ESI-TOF): Calcd for C<sub>15</sub>H<sub>14</sub>F<sub>3</sub>NNaO<sub>3</sub>S<sup>+</sup> [M+Na<sup>+</sup>] requires 368.0539; found 368.0527.

**m.p.** 68–71 °C.

**(±)-5,5-Dimethyl-4-((trifluoromethyl)sulfonyl)-4,5-dihydrobenzo[2,3]benzofuro[6,5,4-cd]indole (27h)**

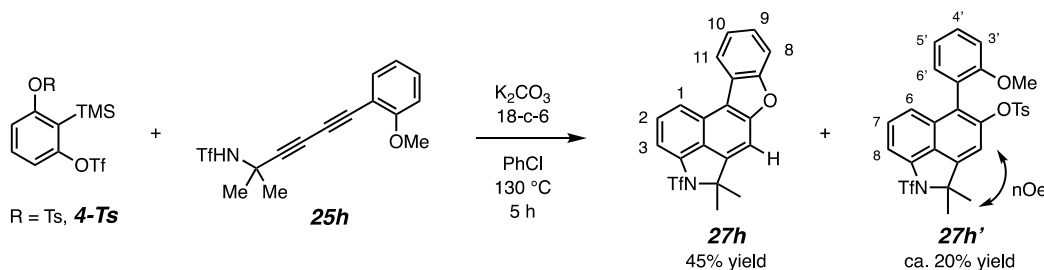

Following general procedure C, diyne **25h** (17 mg, 0.049 mmol), benzyne precursor **4-Ts**<sup>7</sup> (47 mg, 0.10 mmol), K<sub>2</sub>CO<sub>3</sub> (55 mg, 0.40 mmol), 18-crown-6 (26 mg, 0.10 mmol), and chlorobenzene (2.5 mL) were used to prepare the naphthalene derivative **27h**. Purification of the crude material by MPLC (hexanes:EtOAc, 20:1 to 6:1) provided, in the order of elution, **27h** (9.0 mg, 0.022 mmol, 45%) as a pale-yellow crystalline solid and **27h'** (5.8 mg, 20% yield) as a yellow amorphous solid.

**Data for 27h**

**<sup>1</sup>H NMR** (500 MHz, CDCl<sub>3</sub>) δ 8.29 (dd, *J* = 7.2, 1.7 Hz, 1H, *H11*), 8.12 (d, *J* = 8.3 Hz, 1H, *H1*), 7.72 (dd, *J* = 7.9, 7.9 Hz, 1H, *H2*), 7.69 (dd, *J* = 7.4, 1.2 Hz, 1H, *H8*), 7.52 (ddd, *J* = 7.3, 7.3, 1.5 Hz, 1H, *H9*), 7.48 (ddd, *J* = 7.3, 7.3, 1.2 Hz, 1H, *H10*), 7.46 (s, 1H, ArH), 7.43 (d, *J* = 7.6 Hz, 1H, *H3*), 2.03 [q, *J* = 1.0 Hz, 3H, C(CH<sub>3</sub>)<sub>a</sub>], and 2.02 [s, 3H, C(CH<sub>3</sub>)<sub>b</sub>].

**<sup>13</sup>C NMR** (126 MHz, CDCl<sub>3</sub>) δ 156.7, 156.2, 145.0, 140.2, 130.6, 126.8, 126.4, 124.5, 123.6, 122.8, 121.8, 120.1 (q, *J* = 326 Hz), 117.4, 116.5, 112.0, 107.6 (q, *J* = 1.3 Hz), 103.2, 78.1, 31.8, and 27.3 (q, *J* = 2.6 Hz).

**IR** (neat): 3067, 3000, 2932, 1631, 1603, 1459, 1406, 1383, 1346, 1242, 1141, 1021, 998, and 744  $\text{cm}^{-1}$ .

**HRMS** (ESI-TOF): Calcd for  $\text{C}_{20}\text{H}_{14}\text{F}_3\text{NNaO}_3\text{S}^+$  [ $\text{M}+\text{Na}^+$ ] requires 428.0539; found 428.0538.

**m.p.** 147–150  $^{\circ}\text{C}$ .

**(±)-5-(2-Methoxyphenyl)-2,2-dimethyl-1-((trifluoromethyl)sulfonyl)-1,2-dihydrobenzo[cd]indol-4-yl 4-methylbenzenesulfonate (27h')**

The assignment of constitution was made on the basis of nOe correlations as shown in the above scheme.

**$^1\text{H}$  NMR** (500 MHz,  $\text{CDCl}_3$ )  $\delta$  7.68 (nfod,  $J = 8.3$  Hz, 2H,  $\text{SO}_2\text{ArH}_o$ ), 7.397 (dd,  $J = 7.5, 1.6$  Hz, 1H,  $H6'$ ), 7.393 (d,  $J = 7.9$  Hz, 1H,  $H8$ ), 7.34 (ddd,  $J = 8.6, 7.7, 1.5$  Hz, 1H,  $H4'$ ), 7.27 (nfod,  $J = 8.3$  Hz, 2H,  $\text{SO}_2\text{ArH}_m$ ), 7.23 (dd,  $J = 8.2, 8.2$  Hz, 1H,  $H7$ ), 7.14 (d,  $J = 8.2$  Hz, 1H,  $H6$ ), 6.96 (dd,  $J = 7.5, 7.5$  Hz, 1H,  $H5'$ ), 6.90 (d,  $J = 8.5$  Hz, 1H,  $H3'$ ), 6.67 (s, 1H,  $\text{ArH}$ ), 3.89 (s, 3H,  $\text{OCH}_3$ ), 2.39 (s, 3H,  $\text{ArCH}_3$ ), 1.99 [br s, 3H,  $\text{C}(\text{CH}_3)_a$ ], and 1.88 [s, 3H,  $\text{C}(\text{CH}_3)_b$ ].

**$^{13}\text{C}$  NMR** (126 MHz,  $\text{CDCl}_3$ )  $\delta$  160.4, 148.3, 146.2, 142.0, 132.9, 132.2, 130.8, 130.5, 129.8, 128.9, 120.7, 119.9 (q,  $J = 326$  Hz), 119.8, 118.9, 113.3 (q,  $J = 1.3$  Hz), 112.5, 110.8, 104.2, 98.5, 90.1, 76.8, 55.7, 27.1, 22.9 (q,  $J = 2.4$  Hz), and 21.77 (one aromatic carbon resonance was not discernable).

**IR** (neat): 3058, 2941, 2840, 1596, 1492, 1403, 1385, 1274, 1219, 1179, 1140, 1024, 837, and 776  $\text{cm}^{-1}$ .

**HRMS** (ESI-TOF): Calcd for  $\text{C}_{28}\text{H}_{24}\text{F}_3\text{NNaO}_6\text{S}_2^+$  [ $\text{M}+\text{Na}^+$ ] requires 614.0889; found 614.0902.

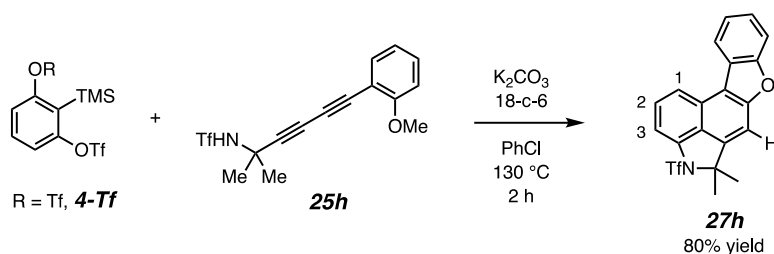

Alternatively, the naphthalene derivative **27h** was prepared from benzyne precursor **4-Tf**<sup>8</sup> (45 mg, 0.10 mmol), diyne **25h** (17 mg, 0.049 mmol),  $\text{K}_2\text{CO}_3$  (55 mg, 0.40 mmol), 18-crown-6 (26 mg, 0.10 mmol), and chlorobenzene (2.5 mL) following general procedure D. Purification of the crude material by MPLC (hexanes:EtOAc, 20:1) afforded naphthalene **27h** (16 mg, 0.040 mmol, 80%) as a pale-yellow crystalline solid.

**1,1,1-Trifluoro-*N*-(6-(2-methoxynaphthalen-1-yl)-2-methylhexa-3,5-diyne-2-yl)methanesulfonamide (25i)**

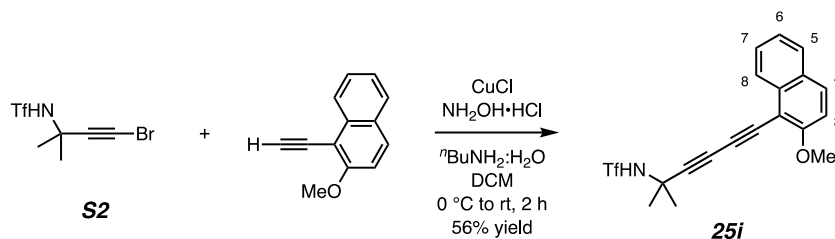

Following general procedure A, bromoalkyne **S2** (0.15 g, 0.50 mmol), 1-ethynyl-2-methoxynaphthalene<sup>15</sup> (0.14 g, 0.75 mmol), CuCl (5.0 mg), *t*BuNH<sub>2</sub>·H<sub>2</sub>O (2.5 mL), and DCM (2.5 mL) were used to prepare diyne **25i**. Purification of the crude material by flash chromatography (hexanes:EtOAc, 4:1) provided **25i** (0.11 g, 0.28 mmol, 56%) as a white crystalline solid.

<sup>1</sup>H NMR (500 MHz, CDCl<sub>3</sub>): δ 8.19 (dd, *J* = 8.4, 1.1 Hz, 1H, *H*8), 7.86 (d, *J* = 9.1 Hz, 1H, *H*4), 7.78 (d, *J* = 8.2 Hz, 1H, *H*5), 7.56 (ddd, *J* = 8.2, 6.8, 1.2 Hz, 1H, *H*6 or *H*7), 7.39 (ddd, *J* = 8.1, 6.8, 1.2 Hz, 1H, *H*7 or *H*6), 7.23 (d, *J* = 9.1 Hz, 1H, *H*3), 5.12 (br s, 1H, TfNH), 4.03 (s, 3H, OCH<sub>3</sub>), and 1.79 [s, 6H, C(CH<sub>3</sub>)<sub>2</sub>].

<sup>13</sup>C NMR (126 MHz, CDCl<sub>3</sub>): δ 161.6, 135.4, 131.7, 128.5, 128.4, 128.1, 125.1, 124.7, 119.2 (q, *J* = 322 Hz), 112.4, 104.2, 84.1, 81.7, 75.0, 69.3, 56.7, 54.1, and 30.6.

IR (neat): 3291, 3065, 2990, 2944, 2844, 2229, 1621, 1590, 1510, 1431, 1363, 1271, 1196, 1068, 995, and 809 cm<sup>-1</sup>.

HRMS (ESI-TOF): Calcd for C<sub>19</sub>H<sub>16</sub>F<sub>3</sub>NNaO<sub>3</sub>S<sup>+</sup> [M+Na<sup>+</sup>] requires 418.0695; found 418.0702.

m.p. 152–154 °C.

**(±)-5-(2-Methoxynaphthalen-1-yl)-2,2-dimethyl-1-((trifluoromethyl)sulfonyl)-1,2-dihydrobenzo[*cd*]indol-4-yl 4-methylbenzenesulfonate (27i)**

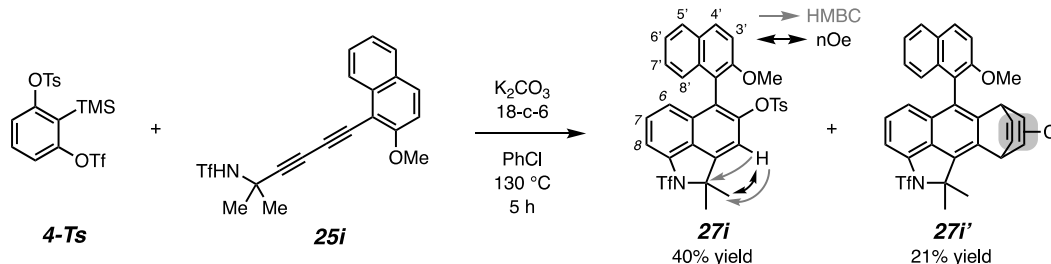

Following general procedure C, diyne **25i** (20 mg, 0.051 mmol), benzyne precursor **4-Ts**<sup>7</sup> (47 mg, 0.10 mmol), K<sub>2</sub>CO<sub>3</sub> (55 mg, 0.40 mmol), 18-crown-6 (26 mg, 0.10 mmol), and chlorobenzene (2.5 mL) were used to prepare binaphthol derivative **27i**. Purification of the crude material by MPLC (hexanes:EtOAc, 6:1) provided, in the order of elution, **27i'** (6.1 mg, a coeluting mixture



of regioisomers and diastereomeric atropisomers and NTf invertomers, 0.010 mmol, 21% yield) as a white amorphous solid and binaphthol derivative **27i** (13 mg, 0.021 mmol, 40%) as a yellow crystalline solid.

### Data for **27i**

The constitution was determined by nOe and HMBC correlations as shown in structure **27i**.

**<sup>1</sup>H NMR** (500 MHz, CDCl<sub>3</sub>) δ 8.19 (dd, *J* = 8.5, 1.2 Hz, 1H, *H8'*), 7.86 (d, *J* = 9.1 Hz, 1H, *H4'*), 7.81 (d, *J* = 8.1 Hz, 1H, *H5'*), 7.73 (nfod, *J* = 8.4 Hz, 2H, SO<sub>2</sub>Ar*H<sub>o</sub>*), 7.61 (ddd, *J* = 8.1, 6.7, 1.3 Hz, 1H, *H7'*), 7.424 (ddd, *J* = 8.0, 6.8, 1.1 Hz, 1H, *H6'*), 7.418 (d, *J* = 8.2 Hz, 1H, *H8*), 7.29 (nfod, *J* = 8.2 Hz, 2H, SO<sub>2</sub>Ar*H<sub>m</sub>*), 7.264 (d, *J* = 9.2 Hz, 1H, *H3'*), 7.258 (dd, *J* = 8.2, 8.2 Hz, 1H, *H7*), 7.19 (dd, *J* = 8.3, 0.8 Hz, 1H, *H6*), 6.79 (s, 1H, Ar*H*), 4.02 (s, 3H, OCH<sub>3</sub>), 2.37 (s, 3H, TsCH<sub>3</sub>), 2.08 [s, 3H, C(CH<sub>3</sub>)<sub>a</sub>], and 1.96 [s, 3H, C(CH<sub>3</sub>)<sub>b</sub>].

**<sup>13</sup>C NMR** (126 MHz, CDCl<sub>3</sub>) δ 159.8, 147.8, 146.2, 146.1, 142.0, 134.2, 132.3, 131.0, 130.8, 129.9, 128.9, 128.6, 128.4, 127.8, 125.2, 124.6, 119.9 (q, *J* = 326 Hz), 119.9, 119.1, 113.3 (q, *J* = 1.4 Hz), 112.4, 106.3, 104.2, 97.0, 95.4, 76.9, 56.4, 27.2, 22.9 (q, *J* = 2.4 Hz), and 21.8.

**IR** (neat): 2974, 2931, 2853, 1597, 1563, 1512, 1459, 1378, 1341, 1269, 1193, 1068, 1007, 880 and 775 cm<sup>-1</sup>.

**HRMS** (ESI-TOF): Calcd for C<sub>32</sub>H<sub>26</sub>F<sub>3</sub>NNaO<sub>6</sub>S<sub>2</sub><sup>+</sup> [M+Na<sup>+</sup>] requires 664.1046; found 664.1029.

**m.p.** 242–244 °C.

---

### Data for **27i'** (mixture of multiple regioisomers and atropisomers)

Due to the complexity of the spectral data, only partial characterization and peak assignments are listed.

**<sup>1</sup>H NMR** (500 MHz, CDCl<sub>3</sub>) δ 8.06–8.01 (m, 1H, Ar*H*), 7.93–7.88 (m, 1H, Ar*H*), 7.51–7.45 (m, 1H, Ar*H*), 7.39–7.33 (m, 1H, Ar*H*), 7.31–7.26 (m, 1H, Ar*H*), 7.25–7.21 (m, 1H, Ar*H*), 7.21–7.13 (m, 1H, Ar*H*), 7.10–6.56 (m, 5H, Ar*H* and alkene-*H*), 6.39 (ddd, *J* = 2.3, 6.3, 6.3 Hz, 0.4H, alkene-*H*), 5.22 (m, 0.2H, bridgehead-*H*), 5.09 (ddd, *J* = 1.5, 2.3, 6.0 Hz, 0.4H, bridgehead-*H*), 4.51–4.45 (m, 0.8H, bridgehead-*H*s), 4.40 (tt, *J* = 2.4, 2.4, 5.6 Hz, 0.3H, bridgehead-*H*), 3.81, 3.79, 3.78, 3.75 (four singlets, ca. 0.35H each, OCH<sub>3</sub>), 3.80, 3.77 (two singlets, 0.6H each, OCH<sub>3</sub>), 2.51 (q, *J* = 0.9 Hz, 0.45H, CMeCH<sub>3</sub>), 2.50 (q, *J* = 0.9 Hz, 0.45H, CMeCH<sub>3</sub>), 2.48 (s, 0.45H, CMeCH<sub>3</sub>), 2.47 (s, 0.45H, CMeCH<sub>3</sub>), 2.26 (q, *J* = 0.8 Hz, 0.8H, CMeCH<sub>3</sub>), 2.24 (s, 0.8H, CMeCH<sub>3</sub>), 2.19 (q, *J* = 0.9 Hz, 0.4H, CMeCH<sub>3</sub>), 2.17 (q, *J* = 0.9 Hz, 0.3H, CMeCH<sub>3</sub>), 2.16 (s, 0.5H, CMeCH<sub>3</sub>), 2.15 (q, *J* = 0.9 Hz, 0.5H, CMeCH<sub>3</sub>), 2.14 (s, 0.5H, CMeCH<sub>3</sub>), and 2.13 (s, 1.0H, CMeCH<sub>3</sub>).

**LRMS** (APCI<sup>+</sup>): Calcd for C<sub>32</sub>H<sub>28</sub><sup>35</sup>ClF<sub>3</sub>NO<sub>3</sub>S<sup>+</sup> [M+H<sup>+</sup>] requires 598.1425; found 598.1.

---

**6-(*tert*-Butyldimethylsilyl)-2,5,5-trimethyl-4-((trifluoromethyl)sulfonyl)-5,8,9,10-tetrahydro-4H-chromeno[7,6,5-cd]indole (29)**

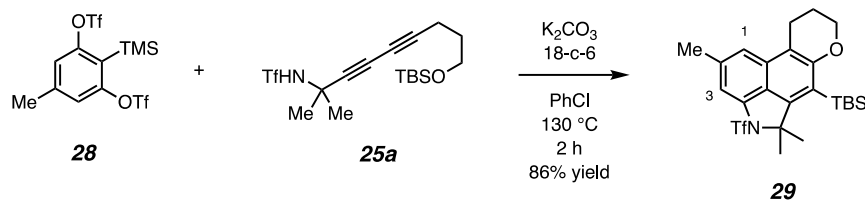

Naphthalene derivative **29** was prepared from benzyne precursor **28**<sup>8</sup> (46 mg, 0.10 mmol), diyne **25a** (20 mg, 0.049 mmol), K<sub>2</sub>CO<sub>3</sub> (55 mg, 0.40 mmol), 18-crown-6 (26 mg, 0.10 mmol), and chlorobenzene (2.5 mL) following general procedure D. Purification of the crude material by MPLC (hexanes:EtOAc, 20:1) afforded naphthalene **29** (21 mg, 0.042 mmol, 86%) as a pale-yellow crystalline solid.

<sup>1</sup>H NMR (500 MHz, CDCl<sub>3</sub>) δ 7.11 (s, 1H, *H*1), 7.04 (s, 1H, *H*3), 4.19 (dt, *J* = 10.5, 5.0 Hz, 1H, OCH<sub>a</sub>H<sub>b</sub>), 4.15 (dt, *J* = 10.5, 5.0 Hz, 1H, OCH<sub>a</sub>H<sub>b</sub>), 2.97 (ddd, *J* = 16.6, 6.5, 6.5 Hz, 1H, ArCH<sub>a</sub>H<sub>b</sub>), 2.96 (dd, *J* = 16.6, 6.5, 6.5 Hz, 1H, ArCH<sub>a</sub>H<sub>b</sub>), 2.51 (s, 3H, ArCH<sub>3</sub>), 2.10 (br app pent, *J* = 6 Hz, 2H, CH<sub>2</sub>CH<sub>2</sub>CH<sub>2</sub>), 2.05 [s, 3H, C(CH<sub>3</sub>)<sub>a</sub>], 2.02 [s, 3H, C(CH<sub>3</sub>)<sub>b</sub>], 0.94 [s, 9H, Si(CH<sub>3</sub>)<sub>3</sub>], 0.50 [s, 3H, Si(CH<sub>3</sub>)<sub>a</sub>], and 0.44 [s, 3H, Si(CH<sub>3</sub>)<sub>b</sub>].

<sup>13</sup>C NMR (126 MHz, CDCl<sub>3</sub>) δ 160.1, 150.9, 140.3, 139.2, 132.3, 120.2 (q, *J* = 328 Hz), 119.9, 119.0, 114.4, 110.8, 107.5 (q, *J* = 1.4 Hz), 80.2, 65.7, 31.7, 29.3, 27.6 (q, *J* = 2.5 Hz), 23.1, 21.7, 21.4, 18.8, 3.2, and 2.3.

IR (neat): 2934, 2894, 2858, 1758, 1626, 1607, 1558, 1400, 1370, 1249, 1199, 1141, 1071, 1017, and 823 cm<sup>-1</sup>.

HRMS (ESI-TOF): Calcd for C<sub>24</sub>H<sub>32</sub>F<sub>3</sub>NNaO<sub>3</sub>SSi<sup>+</sup> [M+Na<sup>+</sup>] requires 522.1716; found 522.1722.

m.p. 180–182 °C.

**4-Chloro-1,1-dimethyl-2-((trifluoromethyl)sulfonyl)-2,7,8,11-tetrahydro-1H,6H-8a,11-ethenophenaleno[1,2,3-cd]indole (31)**

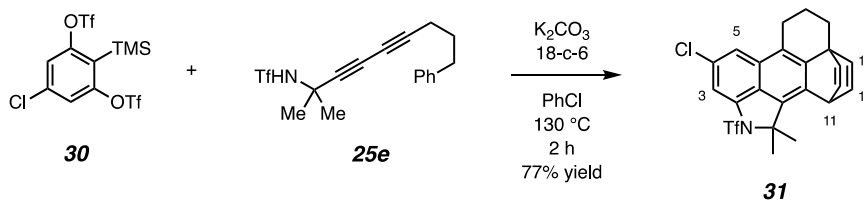

Naphthalene derivatives **31** was prepared from benzyne precursor **30**<sup>8</sup> (48 mg, 0.10 mmol), diyne **25e** (18 mg, 0.050 mmol), K<sub>2</sub>CO<sub>3</sub> (55 mg, 0.40 mmol), 18-crown-6 (26 mg, 0.10 mmol), and chlorobenzene (2.5 mL) following general procedure D. Purification of the crude material by

MPLC (hexanes:EtOAc, 20:1) afforded **31** (18 mg, 0.039 mmol, 77%) as a pale-yellow crystalline solid.

**<sup>1</sup>H NMR** (500 MHz, CDCl<sub>3</sub>) δ 7.40 (d, *J* = 1.2 Hz, 1H, *H5*), 7.26 (s, 1H, *H3*), 6.84 (dd, *J* = 6.5, 6.5 Hz, 1H, *H12a*), 6.82 (dd, *J* = 6.5, 6.5 Hz, 1H, *H12b*), 6.66 (dd, *J* = 6.6, 1.2 Hz, 1H, *H13a*), 6.65 (dd, *J* = 6.6, 1.2 Hz, 1H, *H13b*), 5.12 (tt, *J* = 6.0, 1.5 Hz, 1H, *H11*), 2.91 (ddd, *J* = 16.4, 5.9, 5.9 Hz, 1H, ArCH<sub>a</sub>H<sub>b</sub>), 2.89 (ddd, *J* = 16.4, 6.0, 6.0 Hz, 1H, ArCH<sub>a</sub>H<sub>b</sub>), 2.54 (ddd, *J* = 13.5, 5.3, 5.3 Hz, 1H, CCH<sub>a</sub>H<sub>b</sub>), 2.52 (ddd, *J* = 13.6, 5.3, 5.3 Hz, 1H, CCH<sub>a</sub>H<sub>b</sub>), 2.07 [q, *J* = 1.1 Hz, 3H, C(CH<sub>3</sub>)<sub>a</sub>], 2.03 (br app pent, *J* = 6 Hz, 2H, CH<sub>2</sub>CH<sub>2</sub>CH<sub>2</sub>), and 2.02 [s, 3H, C(CH<sub>3</sub>)<sub>b</sub>].

**<sup>13</sup>C NMR** (126 MHz, CDCl<sub>3</sub>) δ 145.8, 145.4, 145.3, 140.0, 138.39, 138.37, 135.8, 134.0, 131.9, 127.8, 126.6, 121.8, 120.0 (q, *J* = 326 Hz), 116.4, 109.4 (q, *J* = 1.2 Hz), 79.1, 51.3, 43.8, 31.5, 30.6, 26.4 (q, *J* = 2.6 Hz), 24.4, and 21.0.

**IR** (neat): 3067, 2998, 2934, 2860, 1739, 1606, 1496, 1405, 1384, 1223, 1201, 1145, 1090, 964, and 892 cm<sup>-1</sup>.

**HRMS** (ESI-TOF): Calcd for C<sub>23</sub>H<sub>19</sub><sup>35</sup>ClF<sub>3</sub>NNaO<sub>2</sub>S<sup>+</sup> [M+Na<sup>+</sup>] requires 488.0669; found 488.0672.

**m.p.** 198–202 °C.

**(±)-2-Fluoro-5,5-dimethyl-4-((trifluoromethyl)sulfonyl)-4,5-dihydrobenzo[2,3]benzofuro[6,5,4-cd]indole (**33**)**

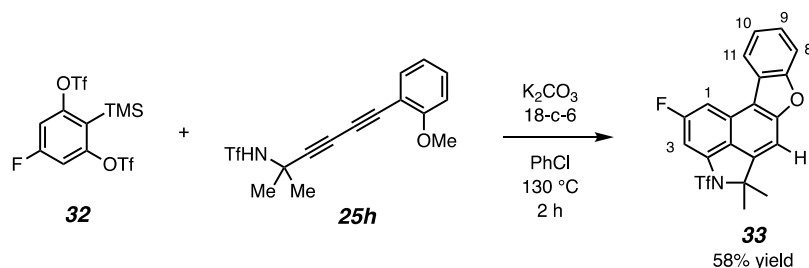

Naphthalene derivative **33** was prepared from benzyne precursor **32**<sup>8</sup> (46 mg, 0.10 mmol), diene **25h** (17 mg, 0.049 mmol), K<sub>2</sub>CO<sub>3</sub> (55 mg, 0.40 mmol), 18-crown-6 (26 mg, 0.10 mmol), and chlorobenzene (2.5 mL) following general procedure D. Purification of the crude material by MPLC (hexanes:EtOAc, 20:1) afforded **33** (12 mg, 0.028 mmol, 58%) as a pale-yellow crystalline solid.

**<sup>1</sup>H NMR** (500 MHz, CDCl<sub>3</sub>) δ 8.19 (dd, *J* = 7.2, 1.3 Hz, 1H, *H11*), 7.71 (dd, *J* = 10.1, 1.6 Hz, 1H, *H1*), 7.68 (dd, *J* = 7.7, 0.8 Hz, 1H, *H8*), 7.52 (ddd, *J* = 7.4, 7.4, 1.3 Hz, 1H, *H9*), 7.49 (ddd, *J* = 7.2, 7.2, 1.0 Hz, 1H, *H10*), 7.40 (s, 1H, ArH), 7.21 (dd, *J* = 9.8, 1.3 Hz, 1H, *H3*), 2.03 [s, 3H, C(CH<sub>3</sub>)<sub>a</sub>], and 2.01 [s, 3H, C(CH<sub>3</sub>)<sub>b</sub>].

**<sup>13</sup>C NMR** (126 MHz, CDCl<sub>3</sub>) δ 164.7 (q, *J* = 248 Hz), 157.3, 156.2, 144.8 (d, *J* = 1.8 Hz), 141.8 (d, *J* = 15 Hz), 126.6, 126.5, 124.1, 123.8, 121.5, 120.0 (q, *J* = 325 Hz), 119.7, 116.4 (d, *J* = 5.5

Hz), 112.1, 102.4 (d,  $J = 2.7$  Hz), 102.2 (d,  $J = 25$  Hz), 99.2 (dq,  $J = 34, 1.5$  Hz), 79.2, 31.7, and 27.2 (q,  $J = 2.7$  Hz).

$^{19}\text{F}$  NMR (471 MHz,  $\text{CDCl}_3$ )  $\delta$  -74.2, and -105.7 (dd,  $J = 10.0, 10.0$  Hz).

IR (neat): 3070, 2981, 2940, 1737, 1637, 1608, 1404, 1386, 1354, 1296, 1198, 1134, 1089, 1051, 985, and 840  $\text{cm}^{-1}$ .

HRMS (ESI-TOF): Calcd for  $\text{C}_{20}\text{H}_{13}\text{F}_4\text{NNaO}_3\text{S}^+$  [ $\text{M}+\text{Na}^+$ ] requires 446.0444; found 446.0460.

m.p. 160–164  $^\circ\text{C}$ .

**(±)-6-(tert-Butyldimethylsilyl)-1,5,5-trimethyl-4-((trifluoromethyl)sulfonyl)-4,5,8,9-tetrahydrobenzofuro[6,5,4-cd]indole (35)**

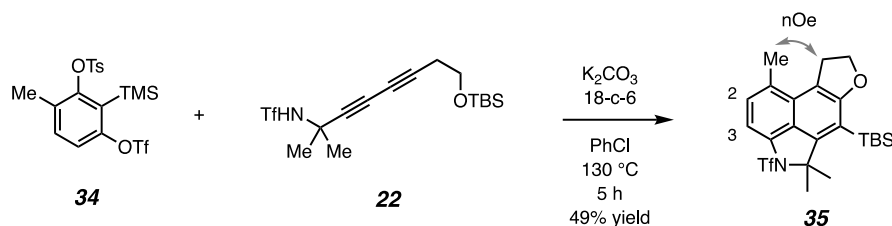

Following general procedure C, diyne **22** (20 mg, 0.050 mmol), benzyne precursor **34**<sup>7</sup> (48 mg, 0.10 mmol),  $\text{K}_2\text{CO}_3$  (55 mg, 0.40 mmol), 18-crown-6 (26 mg, 0.10 mmol), and chlorobenzene (2.5 mL) were used to prepare naphthalene **35**. Purification of the crude material by MPLC (hexanes:EtOAc, 20:1) provided **35** (12 mg, 0.025 mmol, 49%) as a white amorphous solid.

The constitution is assigned on the basis of the nOe correlation indicated in structure **35**.

$^1\text{H}$  NMR (500 MHz,  $\text{CDCl}_3$ )  $\delta$  7.15 (d,  $J = 7.7$  Hz, 1H,  $H_2$ ), 6.99 (d,  $J = 7.8$  Hz, 1H,  $H_3$ ), 4.59 (ddd,  $J = 9.3, 8.5, 8.5$  Hz, 1H,  $\text{OCH}_a\text{H}_b$ ), 4.57 (ddd,  $J = 9.6, 9.6, 8.5$  Hz, 1H,  $\text{OCH}_a\text{H}_b$ ), 3.71 (ddd,  $J = 14.9, 8.4, 8.4$  Hz, 1H,  $\text{ArCH}_a\text{H}_b$ ), 3.70 (ddd,  $J = 14.9, 9.2, 8.5$  Hz, 1H,  $\text{ArCH}_a\text{H}_b$ ), 2.66 (s, 3H,  $\text{ArCH}_3$ ), 2.02 [s, 3H,  $\text{C}(\text{CH}_3)_a$ ], 2.00 [s, 3H,  $\text{C}(\text{CH}_3)_b$ ], 0.93 [s, 9H,  $\text{Si}(\text{CH}_3)_3$ ], 0.53 [s, 3H,  $\text{Si}(\text{CH}_3)_a$ ], and 0.49 [s, 3H,  $\text{Si}(\text{CH}_3)_b$ ].

$^{13}\text{C}$  NMR (126 MHz,  $\text{CDCl}_3$ )  $\delta$  166.5, 137.7, 130.5 (x2), 129.9, 125.9, 122.8, 120.2 (q,  $J = 327$  Hz), 115.9, 113.1, 104.8 (q,  $J = 1.5$  Hz), 78.9, 70.2, 31.9, 30.9, 28.8, 27.8 (q,  $J = 2.6$  Hz), 20.8, 18.8, 1.9, and 1.1.

IR (neat): 2956, 2933, 2895, 2858, 1742, 1620, 1553, 1399, 1315, 1259, 1136, 988, and 821  $\text{cm}^{-1}$ .

HRMS (ESI-TOF): Calcd for  $\text{C}_{23}\text{H}_{30}\text{F}_3\text{NNaO}_3\text{SSi}^+$  [ $\text{M}+\text{Na}^+$ ] requires 508.1560; found 508.1546.

**(±)-(7S)-6-((S)-2-Methoxyphenyl)-1,1,5,8,11-pentamethyl-2-((trifluoromethyl)sulfonyl)-1,2,7,10-tetrahydro-7,10-ethenonaphtho[1,2,3-cd]indole (38)**

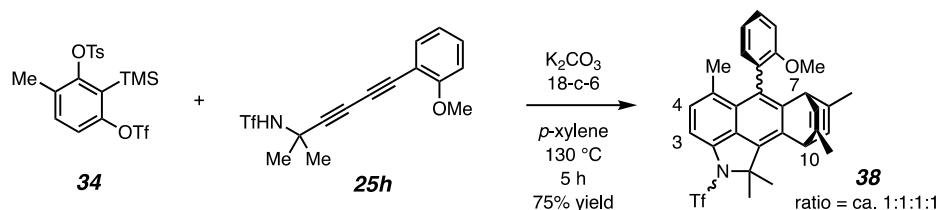

Following general procedure C, diyne **25h** (18 mg, 0.052 mmol), benzyne precursor **34**<sup>7</sup> (48 mg, 0.10 mmol),  $\text{K}_2\text{CO}_3$  (55 mg, 0.40 mmol), 18-crown-6 (26 mg, 0.10 mmol), and *para*-xylene (2.5 mL) were used to prepare naphthalene **38**. Purification of the crude material by MPLC (hexanes:EtOAc, 20:1) provided **38** (21 mg, 0.039 mmol, 75%) as a pale-yellow amorphous solid.

NMR data for this compound indicate that it exists as an ca. 1:1:1:1 mixture of slowly interconverting atropisomeric (biaryl) invertomers (NTf) on the NMR time scale.

**<sup>1</sup>H NMR** (500 MHz,  $\text{CDCl}_3$ )  $\delta$  7.48–7.43 (m, 1H, ArH), 7.13–7.09 (m, 1H, ArH), 7.09–7.00 (m, 4H, ArH), 6.32–6.25 (four overlapping br d, 1H, alkenyl-H), 6.23–6.17 (four overlapping br d, 1H, alkenyl-H), 4.76 (dd,  $J = 6.0, 1.9$  Hz, 0.5H, bridgehead-H10), 4.75 (dd,  $J = 6.0, 1.9$  Hz, 0.5H, bridgehead-H10'), 4.07 (dd,  $J = 6.5, 1.7$  Hz, 0.5H, bridgehead-H7), 4.06 (dd,  $J = 6.3, 1.8$  Hz, 0.5H, bridgehead-H7'), 3.78 (s, 0.75H, A-OCH<sub>3</sub>), 3.771 (s, 0.75H, B-OCH<sub>3</sub>), 3.766 (s, 0.75H, C-OCH<sub>3</sub>), 3.75 (s, 0.75H, D-OCH<sub>3</sub>), 2.15 [q,  $J = 1$  Hz, 0.75H, A-C(CH<sub>3</sub>)], 2.14 [q,  $J = 1$  Hz, 0.75H, B-C(CH<sub>3</sub>)], 2.13 [s, 0.75H, A-C(CH<sub>3</sub>)], 2.11 [br s, 1.5H, B-C(CH<sub>3</sub>), C-C(CH<sub>3</sub>)], 2.082 [q,  $J = 1$  Hz, 0.75H, D-C(CH<sub>3</sub>)], 2.075 [s, 0.75H, C-C(CH<sub>3</sub>)], 2.04 [s, 0.75H, D-C(CH<sub>3</sub>)], 1.931 (br s, 0.75H, A-ArCH<sub>3</sub>), 1.927 (br s, 0.75H, B-ArCH<sub>3</sub>), 1.924 (br s, 0.75H, C-ArCH<sub>3</sub>), 1.921 (br s, 0.75H, D-ArCH<sub>3</sub>), 1.83 (br s, 1.5H, alkenyl-CH<sub>3</sub>), 1.81 (br s, 1.5H, alkenyl-CH<sub>3</sub>), 1.754 (d,  $J = 1.8$  Hz, 0.75H, alkenyl-CH<sub>3</sub>), 1.746 (d,  $J = 1.8$  Hz, 0.75H, alkenyl-CH<sub>3</sub>), 1.696 (d,  $J = 1.8$  Hz, 0.75H, alkenyl-CH<sub>3</sub>), and 1.695 (d,  $J = 1.7$  Hz, 0.75H, alkenyl-CH<sub>3</sub>).

**<sup>13</sup>C NMR** (126 MHz,  $\text{CDCl}_3$ )  $\delta$  157.89, 157.87, 157.82, 157.78, 150.73, 150.71, 150.68, 150.64, 148.40 (2x), 148.19, 148.14, 148.06, 148.00, 147.76 (2x), 137.42 (2x), 137.40, 137.39, 135.23, 135.21, 135.05, 135.03, 134.53, 133.28, 133.26, 132.51, 132.40, 132.26, 132.14, 131.70, 131.69, 131.66, 131.64, 130.76, 130.28, 130.26, 130.22, 130.19, 129.88, 129.86, 129.73, 129.67, 129.65 (2x), 129.61, 129.35, 129.33, 129.31, 129.30, 129.29 (4x), 126.99, 126.97, 126.93, 126.89, 126.60, 126.58, 126.57, 126.55, 124.43, 124.35, 124.28, 124.22, 120.38, 120.31, 120.22, 120.2 (four nearly identical chemical shift q,  $J = \text{ca. } 326$  Hz), 120.18, 110.73, 110.72, 110.24 (2x), 107.81 (br m, 4x, C3), 77.45, 77.43, 77.40 (and perhaps hidden by a  $\text{CDCl}_3$  line), 55.63, 55.57, 55.32, 55.23, 51.64, 51.61, 51.61, 51.59, 49.10, 49.05, 48.96, 48.91, 31.21, 31.05, 30.65, 30.50, 27.1 (q,  $J = 2.6$  Hz), 26.9 (q,  $J = 2.5$  Hz), 26.5 (q,  $J = 2.6$  Hz), 26.3 (q,  $J = 2.6$  Hz), 21.55, 21.52, 21.35, 21.31, 19.21, 19.17, 19.16, 19.15 (2x), 19.13, 19.09, and 19.07.

**<sup>19</sup>F NMR** (471 MHz,  $\text{CDCl}_3$ )  $\delta$  -73.9, -73.98, -74.05, -74.2.

**IR** (neat): 2991, 2964, 2932, 2852, 1769, 1612, 1487, 1462, 1401, 1384, 1201, 1138, and 973  $\text{cm}^{-1}$ .

**HRMS** (ESI-TOF): Calcd for  $C_{30}H_{28}F_3NNaO_3S^+$  [ $M+Na^+$ ] requires 562.1634; found 562.1609.

**((6-(2-(Bromoethynyl)phenyl)hexa-3,5-diyne-1-yloxy)(tert-butyl)dimethylsilane (S6)**

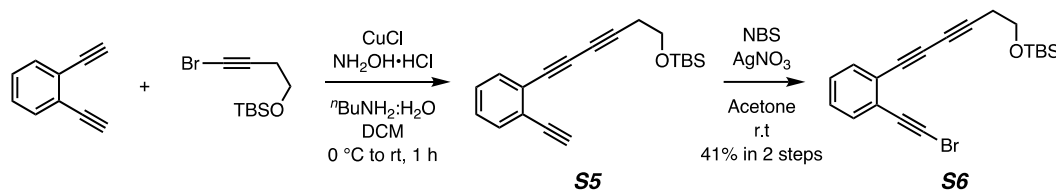

Following general procedure A, (but-3-yn-1-yloxy)(*tert*-butyl)dimethylsilane<sup>5</sup> (0.40 g, 1.5 mmol), 1,2-diethynylbenzene (0.19 g, 1.5 mmol), CuCl (7.5 mg), <sup>*t*</sup>BuNH<sub>2</sub>·H<sub>2</sub>O (7.5 mL), and DCM (7.5 mL) were used to prepare crude triyne **S5**. The crude material was passed through a short pad of silica gel (hexanes:EtOAc, 10:1), and the filtrate was collected and concentrated. The residue (0.27 g, ca. 0.88 mmol) was used directly in the following step without further purification. Following general procedure B, the above crude triyne **S5** (0.27 g, ca. 0.88 mmol), NBS (0.18 g, 1.0 mmol), silver nitrate (17 mg, 0.10 mmol), and acetone (10 mL) were used to prepare bromoalkyne **S6**. Purification of the crude mixture by MPLC (hexanes:EtOAc, 50:1) afforded **S6** (0.24 g, 0.62 mmol, 41% over two steps) as a yellowish oil.

**Data for S6**

**<sup>1</sup>H NMR** (500 MHz, CDCl<sub>3</sub>): δ 7.47–7.44 (nfom, 1H, Ar*H<sub>o</sub>*), 7.44–7.42 (nfom, 1H, Ar*H<sub>o</sub>*), 7.29–7.26 (m, 2H, Ar*H<sub>m</sub>*), 3.80 (t, *J* = 7.0 Hz, 2H, OCH<sub>2</sub>), 2.60 (t, *J* = 7.0 Hz, 2H, ≡CCH<sub>2</sub>), 0.92 [s, 9H, SiC(CH<sub>3</sub>)<sub>3</sub>], and 0.10 [s, 6H, Si(CH<sub>3</sub>)<sub>2</sub>].

**<sup>13</sup>C NMR** (126 MHz, CDCl<sub>3</sub>): δ 133.2, 132.7, 128.6, 128.4, 126.3, 125.3, 83.2, 78.5, 78.2, 73.1, 66.4, 61.5, 54.4, 26.0, 24.3, 18.5, and -5.1.

**IR** (neat): 3063, 2953, 2928, 2855, 2240, 2198, 1471, 1442, 1384, 1253, 1103, 907, 835, 777, and 756 cm<sup>-1</sup>.

**HRMS** (ESI-TOF): Calcd for C<sub>20</sub>H<sub>23</sub><sup>79</sup>BrNaOSi<sup>+</sup> [ $M+Na^+$ ] requires 409.0594; found 409.0592.

***N*-(6-(2-(6-((*tert*-Butyldimethylsilyl)oxy)hexa-1,3-diyne-1-yl)phenyl)-2-methylhexa-3,5-diyne-2-yl)-1,1,1-trifluoromethanesulfonamide (39)**

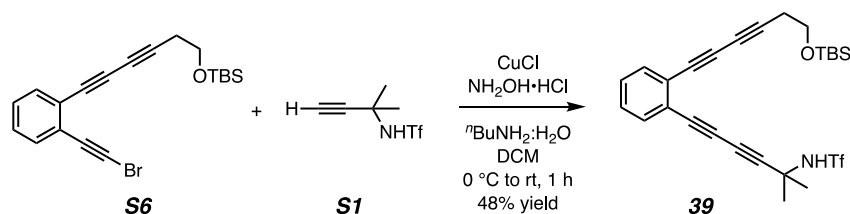

Following general procedure A, alkyne **S1** (0.10 g, 80 wt%, 0.39 mmol), bromotriyne **S6** (0.10 g, 0.26 mmol), CuCl (2.6 mg), <sup>*t*</sup>BuNH<sub>2</sub>·H<sub>2</sub>O (2.0 mL), and DCM (2.0 mL) were used to prepare

tetrayne **39**. Purification of the crude mixture by MPLC (hexanes:EtOAc, 9:1) afforded **39** (65 mg, 0.12 mmol, 48%) as a yellow-brown oil.

**<sup>1</sup>H NMR** (500 MHz, CDCl<sub>3</sub>): δ 7.49–7.48 (nfom, 1H, ArH<sub>o</sub>), 7.48–7.46 (nfom, 1H, ArH<sub>o</sub>'), 7.33–7.27 (m, 2H, ArH<sub>m</sub>), 5.10 (br s, 1H, TfNH), 3.80 (t, *J* = 7.1 Hz, 2H, OCH<sub>2</sub>), 2.61 (t, *J* = 7.0 Hz, 2H, ≡CCH<sub>2</sub>), 1.77 [s, 6H, C(CH<sub>3</sub>)<sub>2</sub>], 0.91 [s, 9H, SiC(CH<sub>3</sub>)<sub>3</sub>], and 0.10 [s, 6H, Si(CH<sub>3</sub>)<sub>2</sub>].

**<sup>13</sup>C NMR** (126 MHz, CDCl<sub>3</sub>): δ 133.45, 133.44, 129.2, 128.7, 125.9, 124.8, 119.2 (q, *J* = 323 Hz), 83.65, 83.57, 78.7, 77.8, 76.5, 72.8, 68.9, 66.3, 61.5, 53.8, 30.6, 26.0, 24.3, 18.5, and -5.2.

**IR** (neat): 3288, 2954, 2930, 2857, 2241, 1427, 1363, 1193, 1136, 994, 909, 834, and 756 cm<sup>-1</sup>.

**HRMS** (ESI-TOF): Calcd for C<sub>26</sub>H<sub>30</sub>F<sub>3</sub>NNaO<sub>3</sub>SSi<sup>+</sup> [M+Na<sup>+</sup>] requires 544.1560; found 544.1554.

**(±)-6-(tert-Butyldimethylsilyl)-2,2-dimethyl-1-((trifluoromethyl)sulfonyl)-1,2,3,4-tetrahydrofuro[3',2':4,5]fluorantheno[3,2,1-cd]indole (40)**

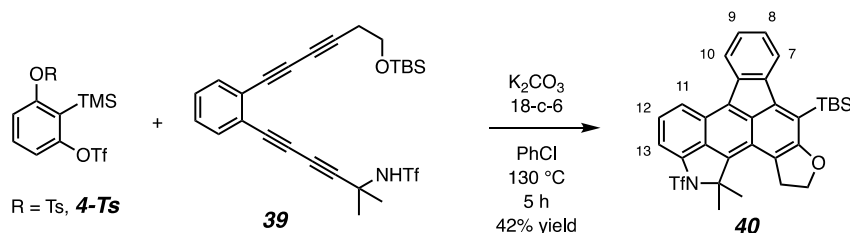

Following general procedure C, tetrayne **39** (25 mg, 0.048 mmol), benzyne precursor **4-Ts**<sup>7</sup> (47 mg, 0.10 mmol), K<sub>2</sub>CO<sub>3</sub> (55 mg, 0.40 mmol), 18-crown-6 (26 mg, 0.10 mmol), and chlorobenzene (2.5 mL) were used to prepare anthracene **40**. Purification of the crude material by MPLC (hexanes:EtOAc, 20:1) provided **40** (12 mg, 0.020 mmol, 42%) as an orange crystalline solid.

**<sup>1</sup>H NMR** (500 MHz, CDCl<sub>3</sub>) δ 8.26 (d, *J* = 7.6 Hz, 1H, H10), 8.23 (d, *J* = 8.6 Hz, 1H, H11), 8.17 (d, *J* = 7.8 Hz, 1H, H7), 7.55 (dd, *J* = 8.3, 7.5 Hz, 1H, H12), 7.42 (dd, *J* = 7.5, 7.5 Hz, 1H, H8 or H9), 7.31 (dd, *J* = 7.7, 7.7 Hz, 1H, H8 or H9), 7.30 (d, *J* = 7.5 Hz, 1H, H13), 4.76 (ddd, *J* = 10.6, 9.3, 7.7 Hz, 1H, OCH<sub>a</sub>H<sub>b</sub>), 4.68 (ddd, *J* = 10.6, 9.1, 9.1 Hz, 1H, OCH<sub>a</sub>H<sub>b</sub>), 3.79 (ddd, *J* = 14.7, 9.3, 9.3 Hz, 1H, ArCH<sub>a</sub>H<sub>b</sub>), 3.74 (ddd, *J* = 14.7, 9.6, 7.3 Hz, 1H, ArCH<sub>a</sub>H<sub>b</sub>), 2.28 [s, 3H, C(CH<sub>3</sub>)<sub>a</sub>], 2.27 [br s, 3H, C(CH<sub>3</sub>)<sub>b</sub>], 1.19 [s, 9H, SiC(CH<sub>3</sub>)<sub>3</sub>], and 0.54 [s, 6H, Si(CH<sub>3</sub>)<sub>2</sub>].

**<sup>13</sup>C NMR** (126 MHz, CDCl<sub>3</sub>) δ 166.6, 148.4, 140.7, 140.0, 139.0, 137.7, 131.18, 131.16, 128.8, 128.5, 128.1, 125.9, 125.6, 125.3, 124.0, 123.2, 120.9, 120.2 (q, *J* = 326 Hz), 117.8, 112.1, 106.4 (q, *J* = 1.4 Hz), 79.6, 70.2, 34.5, 31.4, 28.3, 27.5 (q, *J* = 2.7 Hz), 19.8, and 0.2.

**IR** (neat): 2954, 2928, 2856, 1568, 1466, 1403, 1383, 1264, 1199, 1142, 992, and 755 cm<sup>-1</sup>.

**HRMS** (APCI<sup>+</sup>): Calcd for C<sub>31</sub>H<sub>34</sub>NOSi<sup>+</sup> [M-Tf+2H]<sup>+</sup> requires 464.2404; found 464.2400. The major ion observed represents the protonated molecular ion followed by loss of TfOH.

**m.p.** 154–157 °C.

***N*-(8-((*tert*-Butyldimethylsilyl)oxy)octa-3,5-diyn-1-yl)-4-methylbenzenesulfonamide (**41**)**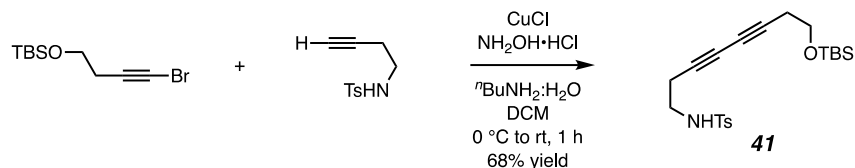

Following general procedure A, ((4-bromobut-3-yn-1-yl)oxy)(*tert*-butyl)dimethylsilane<sup>5</sup> (0.26 g, 1.0 mmol), *N*-(but-3-yn-1-yl)-4-methylbenzenesulfonamide<sup>11</sup> (0.18 g, 0.80 mmol), CuCl (8.0 mg), <sup>t</sup>BuNH<sub>2</sub>:H<sub>2</sub>O (5.0 mL), and DCM (5.0 mL) were used to prepare diyne **41**. Purification of the crude material by flash chromatography (hexanes:EtOAc, 4:1) provided diyne **41** (0.22 g, 0.54 mmol, 68% yield) as a low-melting, pale-yellow crystalline solid.

**<sup>1</sup>H NMR** (500 MHz, CDCl<sub>3</sub>): δ 7.75 (nfod, *J* = 8.3 Hz, 2H, SO<sub>2</sub>Ar*H<sub>o</sub>*), 7.32 (nfod, *J* = 8.2 Hz, 2H, SO<sub>2</sub>Ar*H<sub>m</sub>*), 4.73 (br t, *J* = 6.8 Hz, 1H, TsNH), 3.73 (t, *J* = 7.0 Hz, 2H, OCH<sub>2</sub>), 3.11 (dt, *J* = 6.8, 6.8 Hz, 2H, TsNHCH<sub>2</sub>), 2.47 (t, *J* = 7.0 Hz, 2H, CH<sub>2</sub>CH<sub>2</sub>O), 2.44 (s, 3H, SO<sub>2</sub>ArCH<sub>3</sub>), 2.41 (t, *J* = 6.6 Hz, 2H, CH<sub>2</sub>CH<sub>2</sub>N), 0.90 [s, 9H, SiC(CH<sub>3</sub>)<sub>3</sub>], and 0.07 [s, 6H, Si(CH<sub>3</sub>)<sub>2</sub>].

**<sup>13</sup>C NMR** (126 MHz, CDCl<sub>3</sub>): δ 143.8, 137.0, 130.0, 127.2, 76.0, 73.1, 67.8, 65.9, 61.5, 41.7, 26.0, 23.7, 21.7, 20.8, 18.4, and -5.2.

**IR** (neat): 3283, 2953, 2929, 2857, 2253, 1728, 1599, 1471, 1415, 1328, 1255, 1159, 1094, 1007, 911, and 837 cm<sup>-1</sup>.

**HRMS** (ESI-TOF): Calcd for C<sub>21</sub>H<sub>31</sub>NNaO<sub>3</sub>SSi<sup>+</sup> [M+Na<sup>+</sup>] requires 428.1686; found 428.1695.

**m.p.** 26–29 °C.

**7-(*tert*-Butyldimethylsilyl)-1-methyl-4-tosyl-5,6,9,10-tetrahydro-4H-benzofuro[6,5,4-de]quinoline (**42**)**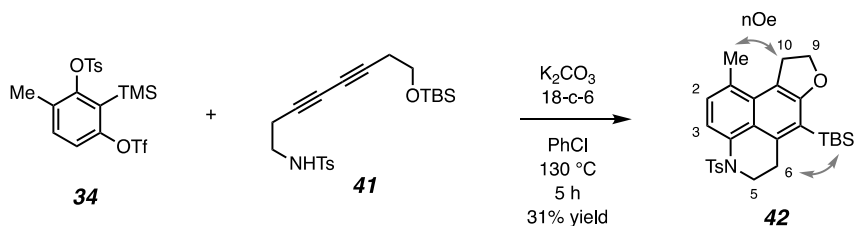

Following general procedure C, diyne **41** (20 mg, 0.050 mmol), benzyne precursor **34**<sup>7</sup> (72 mg, 0.15 mmol), K<sub>2</sub>CO<sub>3</sub> (55 mg, 0.40 mmol), 18-crown-6 (26 mg, 0.10 mmol), and chlorobenzene (2.5 mL) were used to prepare naphthalene **42**. Purification of the crude material by MPLC (hexanes:EtOAc, 20:1) provided **42** (7.7 mg, 0.016 mmol, 31%) as a pale yellow amorphous foam.



Naphthalene **42** slowly decomposed when held in solution under ambient light and air, which resulted in an increase of a few resonances from unidentified species in the  $^1\text{H}$  NMR spectrum.

The constitution of **42** was assigned on the basis of the nOe correlations indicated in structure **42**.

$^1\text{H}$  NMR (500 MHz,  $\text{CDCl}_3$ )  $\delta$  7.47 (d,  $J = 7.7$  Hz, 1H,  $H3$ ), 7.43 (nfod,  $J = 8.3$  Hz, 2H,  $\text{SO}_2\text{Ar}H_o$ ), 7.16 (d,  $J = 7.8$  Hz, 1H,  $H2$ ), 7.08 (nfod,  $J = 8.3$  Hz, 2H,  $\text{SO}_2\text{Ar}H_m$ ), 4.48 (t,  $J = 9.3$ , 8.9 Hz, 2H,  $H9$ ), 3.96 (t,  $J = 6.2$  Hz, 2H,  $H5$ ), 3.78 (t,  $J = 8.9$  Hz, 2H,  $H10$ ), 2.79 (t,  $J = 6.1$  Hz, 2H,  $H6$ ), 2.74 (s, 3H,  $\text{Ar}CH_3$ ), 2.30 (s, 3H,  $\text{SO}_2\text{Ar}CH_3$ ), 0.81 [s, 9H,  $\text{Si}(\text{CH}_3)_3$ ], and 0.25 [s, 6H,  $\text{Si}(\text{CH}_3)_2$ ].

$^{13}\text{C}$  NMR (126 MHz,  $\text{CDCl}_3$ )  $\delta$  143.5, 140.1, 132.9, 130.8, 130.0, 129.7, 128.8, 128.7, 128.5, 127.2, 121.5, 120.8, 118.8, 116.0, 69.7, 45.4, 32.9, 31.0, 27.2, 23.4, 21.6, 18.8, and -0.5.

IR (neat): 2953, 2927, 2855, 1598, 1551, 1471, 1352, 1336, 1290, 1258, 1194, 1091, 1014, 961, 909, and 807  $\text{cm}^{-1}$ .

HRMS (ESI-TOF): Calcd for  $\text{C}_{28}\text{H}_{35}\text{NNaO}_3\text{SSi}^+$  [ $\text{M}+\text{Na}^+$ ] requires 516.1999; found 516.1983.

### III. Computational methods and results

The DFT calculations were performed using Gaussian 09.<sup>16</sup> The geometry of each structure was optimized at the SMD(chlorobenzene)/B3LYP/6-31G(d,p) level of theory in the gas phase. The nature of the optimized structure was verified by frequency calculation (298K, at the same level of theory). For data presented in Figure S1 (Page S42), a single point calculation at SMD(chlorobenzene)/B3LYP-D3BJ/6-311+G(d,p) level of theory was also performed on each optimized geometry to obtain more accurate energies.

Listed are the sum of the electronic and thermal free energies (in Hartree), the Cartesian coordinates at SMD(chlorobenzene)/B3LYP/ 6-31G(d,p) for each structure shown in Figure 4. The sum of the electronic and thermal free energies (in Hartree), the Cartesian coordinates at SMD(chlorobenzene)/B3LYP/ 6-31G(d,p), as well as the electronic energy at SMD(chlorobenzene)/B3LYP-D3BJ/6-311+G(d,p) for each structure shown in Figure S1 are also presented. Three dimensional views were prepared using CYLview.<sup>17</sup>

---

#### Data in Figure 4:

##### 5-Tf

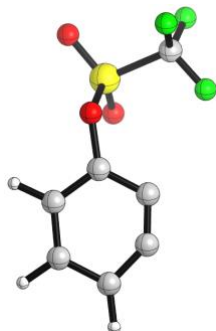

Sum of electronic and thermal Free Energies= -1191.670983

| Center Number | Atomic Number | Atomic Type | Coordinates (Angstroms) |           |           |
|---------------|---------------|-------------|-------------------------|-----------|-----------|
|               |               |             | X                       | Y         | Z         |
| 1             | 6             | 0           | 1.409473                | -0.167664 | -0.374474 |
| 2             | 6             | 0           | 1.658495                | 1.139167  | 0.014584  |
| 3             | 6             | 0           | 2.856180                | 1.415273  | 0.272001  |
| 4             | 6             | 0           | 4.057774                | 0.759727  | 0.259755  |
| 5             | 6             | 0           | 3.805577                | -0.573821 | -0.144778 |
| 6             | 6             | 0           | 2.514762                | -1.032807 | -0.450228 |
| 7             | 16            | 0           | -1.074256               | -0.829693 | 0.285667  |
| 8             | 8             | 0           | -1.856719               | -1.967804 | -0.164372 |
| 9             | 8             | 0           | -0.596847               | -0.692194 | 1.652720  |
| 10            | 6             | 0           | -2.058757               | 0.706737  | -0.141156 |
| 11            | 9             | 0           | -2.346973               | 0.701993  | -1.437936 |

|    |   |   |           |           |           |
|----|---|---|-----------|-----------|-----------|
| 12 | 9 | 0 | -3.181274 | 0.682533  | 0.573643  |
| 13 | 9 | 0 | -1.354126 | 1.792846  | 0.163518  |
| 14 | 1 | 0 | 5.041041  | 1.137818  | 0.506659  |
| 15 | 1 | 0 | 4.644412  | -1.261261 | -0.212572 |
| 16 | 1 | 0 | 2.361908  | -2.063077 | -0.755147 |
| 17 | 8 | 0 | 0.156197  | -0.666802 | -0.790454 |

---

**26h**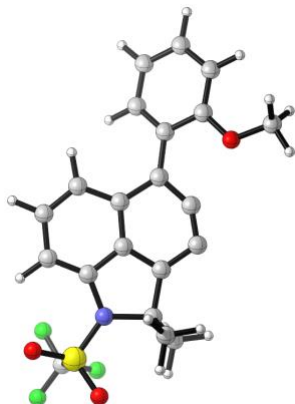

Sum of electronic and thermal Free Energies= -1787.571837

---

| Center Number | Atomic Number | Atomic Type | Coordinates (Angstroms) |           |           |
|---------------|---------------|-------------|-------------------------|-----------|-----------|
|               |               |             | X                       | Y         | Z         |
| 1             | 6             | 0           | -1.186793               | -0.647500 | -0.573950 |
| 2             | 6             | 0           | 0.064366                | -0.067999 | -0.266210 |
| 3             | 6             | 0           | 1.295894                | -0.790533 | -0.301110 |
| 4             | 6             | 0           | 1.186909                | -2.147581 | -0.728085 |
| 5             | 6             | 0           | -0.048125               | -2.689569 | -1.034034 |
| 6             | 6             | 0           | -1.268635               | -1.967707 | -0.954501 |
| 7             | 6             | 0           | -0.080379               | 1.305341  | 0.034821  |
| 8             | 6             | 0           | 1.108520                | 1.969005  | 0.290119  |
| 9             | 6             | 0           | 2.141275                | 1.236671  | 0.253763  |
| 10            | 6             | 0           | 2.520298                | -0.060807 | 0.050824  |
| 11            | 7             | 0           | -2.173438               | 0.377090  | -0.414582 |
| 12            | 6             | 0           | -1.536891               | 1.733050  | -0.038232 |
| 13            | 6             | 0           | -2.035761               | 2.248839  | 1.316218  |
| 14            | 6             | 0           | -1.745214               | 2.761842  | -1.158808 |
| 15            | 16            | 0           | -3.792412               | 0.124291  | -0.613910 |
| 16            | 8             | 0           | -4.480879               | 1.411684  | -0.606550 |
| 17            | 8             | 0           | -4.017408               | -0.863091 | -1.667161 |
| 18            | 6             | 0           | -4.341058               | -0.741815 | 0.962316  |
| 19            | 9             | 0           | -4.127714               | 0.039421  | 2.022176  |
| 20            | 9             | 0           | -5.645285               | -1.003053 | 0.863338  |

|    |   |   |           |           |           |
|----|---|---|-----------|-----------|-----------|
| 21 | 9 | 0 | -3.669136 | -1.885391 | 1.115474  |
| 22 | 6 | 0 | 3.894008  | -0.563877 | 0.168258  |
| 23 | 6 | 0 | 4.957295  | 0.374869  | 0.072111  |
| 24 | 6 | 0 | 6.287661  | -0.038056 | 0.176206  |
| 25 | 6 | 0 | 6.580362  | -1.384205 | 0.406140  |
| 26 | 6 | 0 | 5.552420  | -2.314258 | 0.549166  |
| 27 | 6 | 0 | 4.225373  | -1.901086 | 0.435605  |
| 28 | 8 | 0 | 4.579737  | 1.668633  | -0.112810 |
| 29 | 6 | 0 | 5.574884  | 2.693703  | -0.142518 |
| 30 | 1 | 0 | 2.070225  | -2.758362 | -0.855451 |
| 31 | 1 | 0 | -0.092810 | -3.722782 | -1.366128 |
| 32 | 1 | 0 | -2.203928 | -2.446828 | -1.209480 |
| 33 | 1 | 0 | -1.449431 | 3.133180  | 1.583063  |
| 34 | 1 | 0 | -3.088005 | 2.537001  | 1.272276  |
| 35 | 1 | 0 | -1.897761 | 1.498728  | 2.098378  |
| 36 | 1 | 0 | -1.120489 | 3.635491  | -0.949053 |
| 37 | 1 | 0 | -1.443221 | 2.349304  | -2.125353 |
| 38 | 1 | 0 | -2.786665 | 3.081933  | -1.215394 |
| 39 | 1 | 0 | 7.092685  | 0.681151  | 0.085104  |
| 40 | 1 | 0 | 7.617577  | -1.695514 | 0.487505  |
| 41 | 1 | 0 | 5.776635  | -3.355216 | 0.758927  |
| 42 | 1 | 0 | 3.434879  | -2.622842 | 0.595865  |
| 43 | 1 | 0 | 5.029259  | 3.630992  | -0.258668 |
| 44 | 1 | 0 | 6.149299  | 2.717818  | 0.790065  |
| 45 | 1 | 0 | 6.253564  | 2.561112  | -0.992333 |

---

**26i**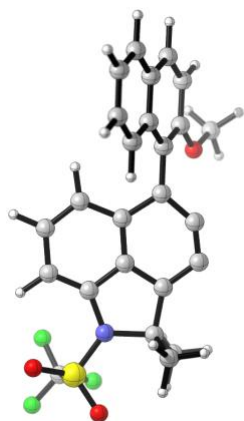

Sum of electronic and thermal Free Energies= -1941.174211

---

| Center<br>Number | Atomic<br>Number | Atomic<br>Type | Coordinates (Angstroms) |   |   |
|------------------|------------------|----------------|-------------------------|---|---|
|                  |                  |                | X                       | Y | Z |

---

|    |    |   |           |           |           |
|----|----|---|-----------|-----------|-----------|
| 1  | 6  | 0 | 1.571133  | -0.687210 | -0.264966 |
| 2  | 6  | 0 | 0.457329  | -0.040211 | 0.313538  |
| 3  | 6  | 0 | -0.870186 | -0.170292 | -0.184245 |
| 4  | 6  | 0 | -1.017559 | -0.996297 | -1.337469 |
| 5  | 6  | 0 | 0.085793  | -1.619153 | -1.888491 |
| 6  | 6  | 0 | 1.405501  | -1.489467 | -1.371100 |
| 7  | 6  | 0 | 0.850260  | 0.742620  | 1.423861  |
| 8  | 6  | 0 | -0.213705 | 1.397182  | 2.002741  |
| 9  | 6  | 0 | -1.372540 | 1.246939  | 1.523314  |
| 10 | 6  | 0 | -1.946864 | 0.544584  | 0.499070  |
| 11 | 7  | 0 | 2.719060  | -0.303604 | 0.501228  |
| 12 | 6  | 0 | 2.342459  | 0.627798  | 1.677550  |
| 13 | 6  | 0 | 3.034862  | 1.991643  | 1.576146  |
| 14 | 6  | 0 | 2.613618  | -0.056887 | 3.025188  |
| 15 | 16 | 0 | 4.253387  | -0.810276 | 0.162609  |
| 16 | 8  | 0 | 5.129801  | -0.460397 | 1.276512  |
| 17 | 8  | 0 | 4.216546  | -2.159703 | -0.395920 |
| 18 | 6  | 0 | 4.811658  | 0.272267  | -1.269940 |
| 19 | 9  | 0 | 4.906293  | 1.544805  | -0.882118 |
| 20 | 9  | 0 | 6.008187  | -0.153956 | -1.676470 |
| 21 | 9  | 0 | 3.940668  | 0.182056  | -2.277941 |
| 22 | 6  | 0 | -3.373347 | 0.508227  | 0.088268  |
| 23 | 6  | 0 | -3.963241 | 1.673220  | -0.408032 |
| 24 | 6  | 0 | -5.320150 | 1.678929  | -0.822366 |
| 25 | 6  | 0 | -6.073565 | 0.532475  | -0.732117 |
| 26 | 6  | 0 | -5.529107 | -0.669992 | -0.217083 |
| 27 | 6  | 0 | -4.157883 | -0.683266 | 0.208136  |
| 28 | 8  | 0 | -3.167506 | 2.774076  | -0.477446 |
| 29 | 6  | 0 | -3.713094 | 3.998534  | -0.967513 |
| 30 | 1  | 0 | -1.996682 | -1.133313 | -1.781471 |
| 31 | 1  | 0 | -0.051361 | -2.243983 | -2.766381 |
| 32 | 1  | 0 | 2.227673  | -2.007965 | -1.845412 |
| 33 | 1  | 0 | 2.626915  | 2.642529  | 2.355241  |
| 34 | 1  | 0 | 4.111633  | 1.904788  | 1.733962  |
| 35 | 1  | 0 | 2.846541  | 2.459664  | 0.607162  |
| 36 | 1  | 0 | 2.163954  | 0.547021  | 3.819298  |
| 37 | 1  | 0 | 2.161130  | -1.051820 | 3.053166  |
| 38 | 1  | 0 | 3.684020  | -0.144647 | 3.215783  |
| 39 | 1  | 0 | -5.764965 | 2.584429  | -1.216133 |
| 40 | 1  | 0 | -7.110791 | 0.542482  | -1.055934 |
| 41 | 1  | 0 | -2.898434 | 4.722890  | -0.918935 |
| 42 | 1  | 0 | -4.047958 | 3.905299  | -2.007052 |
| 43 | 1  | 0 | -4.543394 | 4.350175  | -0.344534 |
| 44 | 6  | 0 | -6.311641 | -1.851270 | -0.102578 |
| 45 | 6  | 0 | -3.644104 | -1.893113 | 0.759369  |
| 46 | 6  | 0 | -4.431240 | -3.018645 | 0.860435  |

|    |   |   |           |           |           |
|----|---|---|-----------|-----------|-----------|
| 47 | 6 | 0 | -5.777677 | -3.005800 | 0.421149  |
| 48 | 1 | 0 | -6.383331 | -3.903125 | 0.505517  |
| 49 | 1 | 0 | -4.014973 | -3.927135 | 1.286457  |
| 50 | 1 | 0 | -7.346102 | -1.820317 | -0.434914 |
| 51 | 1 | 0 | -2.618830 | -1.922165 | 1.110232  |

---

A

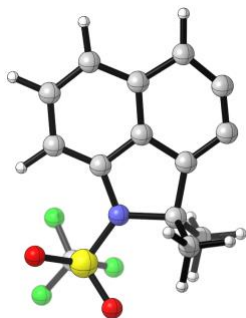

Sum of electronic and thermal Free Energies= -1442.080983

---

| Center Number | Atomic Number | Atomic Type | Coordinates (Angstroms) |           |           |
|---------------|---------------|-------------|-------------------------|-----------|-----------|
|               |               |             | X                       | Y         | Z         |
| 1             | 6             | 0           | -0.700534               | 0.739842  | -0.362583 |
| 2             | 6             | 0           | -1.929070               | 0.139112  | -0.013652 |
| 3             | 6             | 0           | -3.138412               | 0.870044  | 0.150963  |
| 4             | 6             | 0           | -3.048530               | 2.277696  | -0.056150 |
| 5             | 6             | 0           | -1.836618               | 2.846309  | -0.397129 |
| 6             | 6             | 0           | -0.633525               | 2.100799  | -0.560708 |
| 7             | 6             | 0           | -1.785084               | -1.260310 | 0.136855  |
| 8             | 6             | 0           | -2.972239               | -1.868280 | 0.472346  |
| 9             | 6             | 0           | -4.027304               | -1.187215 | 0.613777  |
| 10            | 6             | 0           | -4.333519               | 0.137309  | 0.505601  |
| 11            | 7             | 0           | 0.271080                | -0.310215 | -0.423732 |
| 12            | 6             | 0           | -0.357106               | -1.695553 | -0.139469 |
| 13            | 6             | 0           | 0.269991                | -2.369555 | 1.085787  |
| 14            | 6             | 0           | -0.294561               | -2.590006 | -1.386313 |
| 15            | 16            | 0           | 1.867455                | -0.059003 | -0.765464 |
| 16            | 8             | 0           | 2.510410                | -1.344531 | -1.020296 |
| 17            | 8             | 0           | 2.002520                | 1.067804  | -1.685193 |
| 18            | 6             | 0           | 2.612411                | 0.560579  | 0.846395  |
| 19            | 9             | 0           | 2.571828                | -0.395177 | 1.775533  |
| 20            | 9             | 0           | 3.881874                | 0.898332  | 0.617571  |
| 21            | 9             | 0           | 1.938529                | 1.627963  | 1.281363  |
| 22            | 1             | 0           | -3.933939               | 2.896042  | 0.052857  |
| 23            | 1             | 0           | -1.786853               | 3.919996  | -0.553951 |
| 24            | 1             | 0           | 0.282950                | 2.605666  | -0.834553 |

|    |   |   |           |           |           |
|----|---|---|-----------|-----------|-----------|
| 25 | 1 | 0 | -0.300539 | -3.275634 | 1.310583  |
| 26 | 1 | 0 | 1.305459  | -2.657589 | 0.894641  |
| 27 | 1 | 0 | 0.230584  | -1.715031 | 1.959505  |
| 28 | 1 | 0 | -0.906869 | -3.479302 | -1.208076 |
| 29 | 1 | 0 | -0.693772 | -2.067795 | -2.259983 |
| 30 | 1 | 0 | 0.728490  | -2.905723 | -1.594588 |
| 31 | 1 | 0 | -5.291271 | 0.624057  | 0.646493  |

---

**B**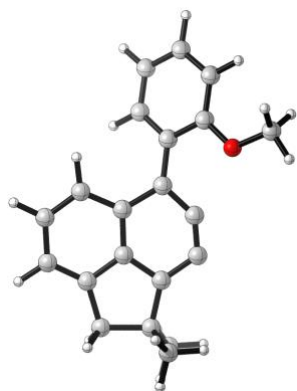

Sum of electronic and thermal Free Energies= -885.952070

---

| Center Number | Atomic Number | Atomic Type | Coordinates (Angstroms) |           |           |
|---------------|---------------|-------------|-------------------------|-----------|-----------|
|               |               |             | X                       | Y         | Z         |
| 1             | 6             | 0           | 2.819121                | 1.288357  | -0.271680 |
| 2             | 6             | 0           | 1.686345                | 0.475094  | -0.031112 |
| 3             | 6             | 0           | 0.336755                | 0.950208  | -0.095445 |
| 4             | 6             | 0           | 0.198287                | 2.315063  | -0.486090 |
| 5             | 6             | 0           | 1.311281                | 3.100806  | -0.732639 |
| 6             | 6             | 0           | 2.637865                | 2.609076  | -0.616274 |
| 7             | 6             | 0           | 2.081038                | -0.867005 | 0.245552  |
| 8             | 6             | 0           | 0.990653                | -1.694347 | 0.438262  |
| 9             | 6             | 0           | -0.175638               | -1.214378 | 0.385467  |
| 10            | 6             | 0           | -0.756015               | 0.009322  | 0.184155  |
| 11            | 6             | 0           | 3.594212                | -1.015149 | 0.221485  |
| 12            | 6             | 0           | 4.123992                | -1.499921 | 1.584343  |
| 13            | 6             | 0           | 4.023995                | -1.998887 | -0.884390 |
| 14            | 6             | 0           | -2.195708               | 0.312311  | 0.243544  |
| 15            | 6             | 0           | -3.137341               | -0.685388 | -0.128609 |
| 16            | 6             | 0           | -4.509900               | -0.423814 | -0.068887 |
| 17            | 6             | 0           | -4.966970               | 0.817943  | 0.378777  |
| 18            | 6             | 0           | -4.061863               | 1.797594  | 0.780501  |
| 19            | 6             | 0           | -2.692836               | 1.537358  | 0.714429  |

|    |   |   |           |           |           |
|----|---|---|-----------|-----------|-----------|
| 20 | 8 | 0 | -2.615264 | -1.875940 | -0.529896 |
| 21 | 6 | 0 | -3.501514 | -2.939503 | -0.874588 |
| 22 | 1 | 0 | -0.786763 | 2.743639  | -0.622653 |
| 23 | 1 | 0 | 1.161058  | 4.133442  | -1.036582 |
| 24 | 1 | 0 | 3.478971  | 3.267476  | -0.816258 |
| 25 | 1 | 0 | 3.725296  | -2.491211 | 1.825860  |
| 26 | 1 | 0 | 5.217752  | -1.568562 | 1.570647  |
| 27 | 1 | 0 | 3.836003  | -0.815474 | 2.389150  |
| 28 | 1 | 0 | 3.614468  | -2.997423 | -0.696655 |
| 29 | 1 | 0 | 3.671695  | -1.669447 | -1.867489 |
| 30 | 1 | 0 | 5.116124  | -2.081990 | -0.923503 |
| 31 | 1 | 0 | -5.224482 | -1.181827 | -0.365976 |
| 32 | 1 | 0 | -6.035813 | 1.006358  | 0.421188  |
| 33 | 1 | 0 | -4.413266 | 2.754421  | 1.153642  |
| 34 | 1 | 0 | -1.994206 | 2.287343  | 1.066358  |
| 35 | 1 | 0 | -2.862213 | -3.783916 | -1.136495 |
| 36 | 1 | 0 | -4.142641 | -3.218424 | -0.030347 |
| 37 | 1 | 0 | -4.124874 | -2.677182 | -1.737214 |
| 38 | 6 | 0 | 4.075975  | 0.454475  | -0.098497 |
| 39 | 1 | 0 | 4.698275  | 0.478018  | -1.000424 |
| 40 | 1 | 0 | 4.696329  | 0.847004  | 0.716085  |

---

C

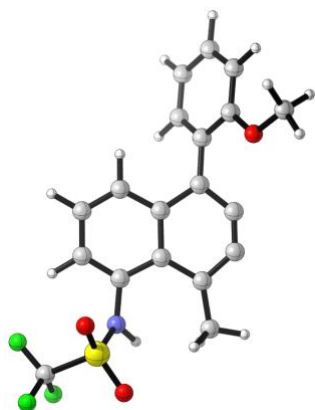

Sum of electronic and thermal Free Energies= -1710.178196

---

| Center Number | Atomic Number | Atomic Type | Coordinates (Angstroms) |           |           |
|---------------|---------------|-------------|-------------------------|-----------|-----------|
|               |               |             | X                       | Y         | Z         |
| 1             | 6             | 0           | -1.284440               | -0.395055 | 0.425930  |
| 2             | 6             | 0           | -0.072590               | 0.371370  | 0.578427  |
| 3             | 6             | 0           | 1.175340                | -0.347860 | 0.289585  |
| 4             | 6             | 0           | 1.111677                | -1.681358 | -0.199594 |
| 5             | 6             | 0           | -0.079331               | -2.349931 | -0.342652 |



|    |    |   |           |           |           |
|----|----|---|-----------|-----------|-----------|
| 6  | 6  | 0 | -1.278740 | -1.709576 | 0.004871  |
| 7  | 6  | 0 | -0.054461 | 1.779412  | 0.989191  |
| 8  | 6  | 0 | 1.241194  | 2.217573  | 0.990960  |
| 9  | 6  | 0 | 2.301442  | 1.593357  | 0.755620  |
| 10 | 6  | 0 | 2.492217  | 0.279990  | 0.437738  |
| 11 | 7  | 0 | -2.575469 | 0.179764  | 0.685500  |
| 12 | 6  | 0 | -1.209032 | 2.662392  | 1.396744  |
| 13 | 16 | 0 | -3.682449 | 0.545032  | -0.495386 |
| 14 | 8  | 0 | -4.295028 | 1.837974  | -0.187298 |
| 15 | 8  | 0 | -3.146472 | 0.222900  | -1.813224 |
| 16 | 6  | 0 | -5.045912 | -0.693107 | -0.166025 |
| 17 | 9  | 0 | -5.447807 | -0.586057 | 1.102339  |
| 18 | 9  | 0 | -6.068373 | -0.431108 | -0.980727 |
| 19 | 9  | 0 | -4.616117 | -1.938290 | -0.388371 |
| 20 | 6  | 0 | 3.800538  | -0.396202 | 0.299119  |
| 21 | 6  | 0 | 4.854217  | 0.238281  | -0.409869 |
| 22 | 6  | 0 | 6.108863  | -0.375271 | -0.505056 |
| 23 | 6  | 0 | 6.334415  | -1.608684 | 0.109576  |
| 24 | 6  | 0 | 5.318901  | -2.236864 | 0.827347  |
| 25 | 6  | 0 | 4.067645  | -1.626571 | 0.917781  |
| 26 | 8  | 0 | 4.560233  | 1.440824  | -0.971479 |
| 27 | 6  | 0 | 5.582740  | 2.138550  | -1.680642 |
| 28 | 1  | 0 | 2.034526  | -2.172243 | -0.480466 |
| 29 | 1  | 0 | -0.097634 | -3.367820 | -0.718456 |
| 30 | 1  | 0 | -2.221577 | -2.237143 | -0.073913 |
| 31 | 1  | 0 | 6.911139  | 0.102563  | -1.053828 |
| 32 | 1  | 0 | 7.314306  | -2.070051 | 0.027200  |
| 33 | 1  | 0 | 5.496574  | -3.187002 | 1.321022  |
| 34 | 1  | 0 | 3.283026  | -2.099959 | 1.498935  |
| 35 | 1  | 0 | 5.125190  | 3.069782  | -2.018162 |
| 36 | 1  | 0 | 6.437076  | 2.369319  | -1.033626 |
| 37 | 1  | 0 | 5.926979  | 1.569694  | -2.552274 |
| 38 | 1  | 0 | -2.715137 | 0.733337  | 1.523487  |
| 39 | 1  | 0 | -1.702722 | 2.304492  | 2.308775  |
| 40 | 1  | 0 | -0.821001 | 3.658049  | 1.620572  |
| 41 | 1  | 0 | -1.970581 | 2.770956  | 0.620932  |

---

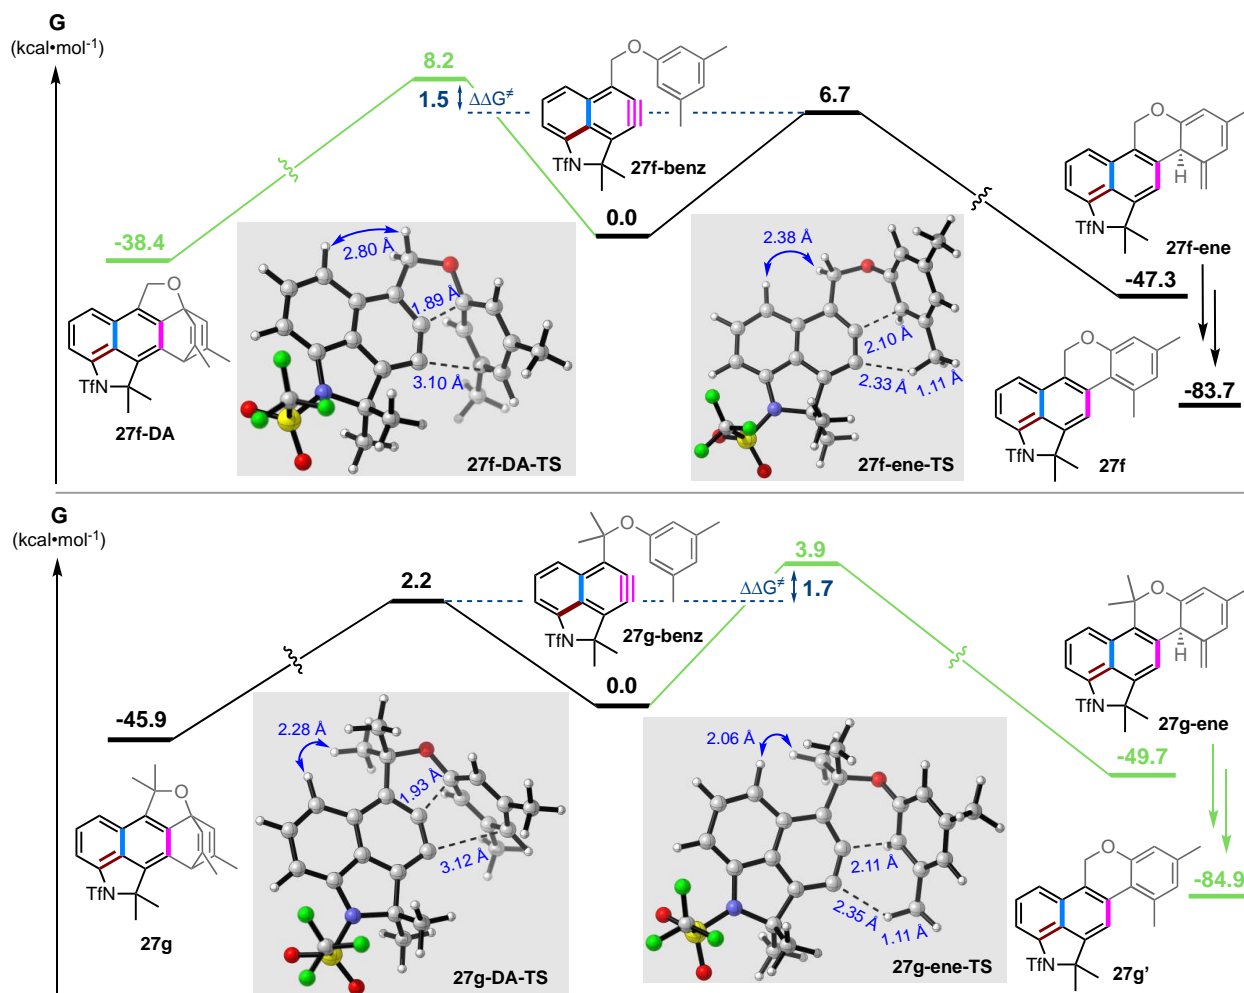

**Figure S1.** DFT-Calculated energy profiles of reactions leading to **27f** (the ene product for the CH<sub>2</sub> linker) and **27g** (the Diels-Alder product for the CMe<sub>2</sub> linker). Full conformational analyses were not performed for the benzyne intermediates **27f-benz** and **27g-benz**.

### Data for Figure S1:

#### 27f-benz

Thermal correction to Gibbs Free Energy= 0.320925

Sum of electronic and thermal Free Energies= -1866.164850

E[SMD(chlorobenzene)/B3LYP-D3BJ/6-311+G(d,p)] = -1867.00993708

| Center Number | Atomic Number | Atomic Type | Coordinates (Angstroms) |          |           |
|---------------|---------------|-------------|-------------------------|----------|-----------|
|               |               |             | X                       | Y        | Z         |
| 1             | 6             | 0           | -0.975729               | 2.781193 | -0.613851 |
| 2             | 6             | 0           | -2.213780               | 2.080233 | -0.631657 |
| 3             | 6             | 0           | -2.165271               | 0.709335 | -0.506540 |
| 4             | 6             | 0           | -0.921559               | 0.055916 | -0.373022 |
| 5             | 6             | 0           | 0.324099                | 0.742643 | -0.351305 |

|    |    |   |           |           |           |
|----|----|---|-----------|-----------|-----------|
| 6  | 6  | 0 | 0.252416  | 2.161425  | -0.479397 |
| 7  | 6  | 0 | -1.095993 | -1.345601 | -0.271255 |
| 8  | 6  | 0 | 0.105790  | -1.997492 | -0.140177 |
| 9  | 6  | 0 | 1.196993  | -1.361887 | -0.118111 |
| 10 | 6  | 0 | 1.537206  | -0.042233 | -0.204108 |
| 11 | 7  | 0 | -3.174068 | -0.305404 | -0.469200 |
| 12 | 6  | 0 | -2.563388 | -1.723453 | -0.358000 |
| 13 | 6  | 0 | -3.028828 | -2.458892 | 0.903783  |
| 14 | 6  | 0 | -2.844707 | -2.532564 | -1.632715 |
| 15 | 16 | 0 | -4.793383 | 0.015309  | -0.530714 |
| 16 | 8  | 0 | -5.031859 | 1.190151  | -1.365561 |
| 17 | 8  | 0 | -5.520598 | -1.234290 | -0.731929 |
| 18 | 6  | 0 | -5.234617 | 0.579826  | 1.207992  |
| 19 | 9  | 0 | -6.510638 | 0.966565  | 1.212961  |
| 20 | 9  | 0 | -5.073550 | -0.419548 | 2.075994  |
| 21 | 9  | 0 | -4.456453 | 1.604206  | 1.565871  |
| 22 | 6  | 0 | 2.911704  | 0.556296  | -0.158162 |
| 23 | 8  | 0 | 3.834771  | -0.511921 | 0.012931  |
| 24 | 6  | 0 | 5.169658  | -0.213687 | 0.086896  |
| 25 | 6  | 0 | 5.694772  | 1.076328  | 0.009557  |
| 26 | 6  | 0 | 7.085660  | 1.270344  | 0.097817  |
| 27 | 6  | 0 | 7.919673  | 0.165103  | 0.262693  |
| 28 | 6  | 0 | 7.397778  | -1.139322 | 0.341692  |
| 29 | 6  | 0 | 6.019896  | -1.318586 | 0.252400  |
| 30 | 6  | 0 | 8.322750  | -2.319431 | 0.522464  |
| 31 | 6  | 0 | 7.651136  | 2.668266  | 0.006871  |
| 32 | 1  | 0 | -1.008222 | 3.862287  | -0.713439 |
| 33 | 1  | 0 | -3.142424 | 2.622873  | -0.744591 |
| 34 | 1  | 0 | 1.159117  | 2.757187  | -0.475797 |
| 35 | 1  | 0 | -2.459994 | -3.389795 | 0.986119  |
| 36 | 1  | 0 | -2.841810 | -1.864007 | 1.800699  |
| 37 | 1  | 0 | -4.089582 | -2.711150 | 0.849733  |
| 38 | 1  | 0 | -2.251518 | -3.451700 | -1.602243 |
| 39 | 1  | 0 | -3.899939 | -2.800205 | -1.704709 |
| 40 | 1  | 0 | -2.556263 | -1.967321 | -2.523018 |
| 41 | 1  | 0 | 5.047663  | 1.936861  | -0.118092 |
| 42 | 1  | 0 | 8.994783  | 0.313504  | 0.331098  |
| 43 | 1  | 0 | 5.579713  | -2.309575 | 0.309355  |
| 44 | 1  | 0 | 8.890193  | -2.238516 | 1.457177  |
| 45 | 1  | 0 | 7.770424  | -3.262749 | 0.545545  |
| 46 | 1  | 0 | 9.055434  | -2.377064 | -0.290973 |
| 47 | 1  | 0 | 7.214784  | 3.325654  | 0.767964  |
| 48 | 1  | 0 | 8.735954  | 2.669367  | 0.143463  |
| 49 | 1  | 0 | 7.435422  | 3.121747  | -0.968106 |
| 50 | 1  | 0 | 2.989011  | 1.273554  | 0.672050  |
| 51 | 1  | 0 | 3.123187  | 1.106853  | -1.086569 |

---

**27f-ene-TS**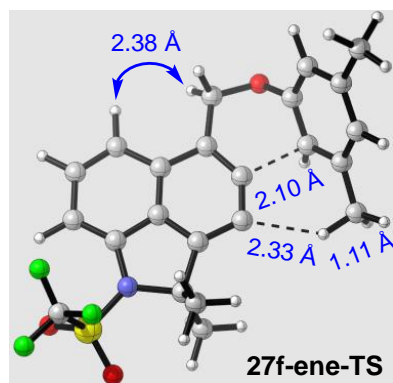

One imaginary frequency:  $-182.85 \text{ cm}^{-1}$   
 Thermal correction to Gibbs Free Energy=  $0.326623$   
 Sum of electronic and thermal Free Energies=  $-1866.148841$   
 $E[\text{SMD}(\text{chlorobenzene})/\text{B3LYP-D3BJ}/6\text{-}311+\text{G}(\text{d},\text{p})] = -1867.00501394$

| Center Number | Atomic Number | Atomic Type | Coordinates (Angstroms) |           |           |
|---------------|---------------|-------------|-------------------------|-----------|-----------|
|               |               |             | X                       | Y         | Z         |
| 1             | 6             | 0           | -1.764973               | 1.101528  | -0.364203 |
| 2             | 6             | 0           | -0.377262               | 0.863060  | -0.448398 |
| 3             | 6             | 0           | -2.236491               | 2.381246  | -0.173322 |
| 4             | 7             | 0           | -2.407815               | -0.170356 | -0.498777 |
| 5             | 6             | 0           | 0.596299                | 1.885891  | -0.344256 |
| 6             | 6             | 0           | -0.086411               | -0.499856 | -0.641946 |
| 7             | 6             | 0           | -1.268615               | 3.420566  | -0.064706 |
| 8             | 1             | 0           | -3.291109               | 2.613018  | -0.108221 |
| 9             | 6             | 0           | -1.379328               | -1.307687 | -0.717926 |
| 10            | 16            | 0           | -4.041137               | -0.378330 | -0.432882 |
| 11            | 6             | 0           | 0.094756                | 3.206745  | -0.141075 |
| 12            | 6             | 0           | 1.977430                | 1.484010  | -0.451037 |
| 13            | 6             | 0           | 1.243213                | -0.863459 | -0.742640 |
| 14            | 1             | 0           | -1.632628               | 4.432996  | 0.085612  |
| 15            | 6             | 0           | -1.549518               | -1.930137 | -2.110003 |
| 16            | 6             | 0           | -1.446541               | -2.359261 | 0.393393  |
| 17            | 8             | 0           | -4.716143               | 0.789502  | -0.996010 |
| 18            | 8             | 0           | -4.372177               | -1.735919 | -0.857223 |
| 19            | 6             | 0           | -4.462781               | -0.316816 | 1.397903  |
| 20            | 1             | 0           | 0.774597                | 4.047101  | -0.046582 |
| 21            | 6             | 0           | 2.103550                | 0.124133  | -0.636120 |
| 22            | 6             | 0           | 3.082571                | 2.499752  | -0.313675 |
| 23            | 1             | 0           | -0.691532               | -2.581639 | -2.302599 |
| 24            | 1             | 0           | -2.463195               | -2.522950 | -2.176098 |
| 25            | 1             | 0           | -1.568763               | -1.155348 | -2.881726 |
| 26            | 1             | 0           | -0.608050               | -3.049290 | 0.259681  |

|    |   |   |           |           |           |
|----|---|---|-----------|-----------|-----------|
| 27 | 1 | 0 | -1.351664 | -1.897083 | 1.378916  |
| 28 | 1 | 0 | -2.374319 | -2.933802 | 0.350771  |
| 29 | 9 | 0 | -4.057886 | 0.842665  | 1.922562  |
| 30 | 9 | 0 | -5.786266 | -0.424714 | 1.529004  |
| 31 | 9 | 0 | -3.874245 | -1.322130 | 2.048213  |
| 32 | 8 | 0 | 4.372409  | 2.023265  | -0.753432 |
| 33 | 1 | 0 | 3.161026  | 2.831612  | 0.732001  |
| 34 | 1 | 0 | 2.879603  | 3.381001  | -0.927729 |
| 35 | 6 | 0 | 4.670249  | 0.773403  | -0.283326 |
| 36 | 6 | 0 | 4.126150  | -0.325440 | -1.000678 |
| 37 | 6 | 0 | 5.394604  | 0.592519  | 0.880576  |
| 38 | 6 | 0 | 4.386395  | -1.646579 | -0.529661 |
| 39 | 1 | 0 | 3.880541  | -0.174844 | -2.047582 |
| 40 | 6 | 0 | 5.636566  | -0.711012 | 1.354664  |
| 41 | 1 | 0 | 5.770114  | 1.458172  | 1.418031  |
| 42 | 6 | 0 | 5.108545  | -1.805675 | 0.652500  |
| 43 | 6 | 0 | 3.760258  | -2.788135 | -1.246788 |
| 44 | 6 | 0 | 6.440414  | -0.914270 | 2.611556  |
| 45 | 1 | 0 | 5.286921  | -2.808836 | 1.030304  |
| 46 | 1 | 0 | 4.061520  | -3.757860 | -0.843553 |
| 47 | 1 | 0 | 2.659816  | -2.665679 | -1.135891 |
| 48 | 1 | 0 | 3.960413  | -2.763225 | -2.323290 |
| 49 | 1 | 0 | 5.977275  | -0.398091 | 3.460548  |
| 50 | 1 | 0 | 6.530956  | -1.973297 | 2.864597  |
| 51 | 1 | 0 | 7.449739  | -0.500520 | 2.500671  |

**27f-DA-TS**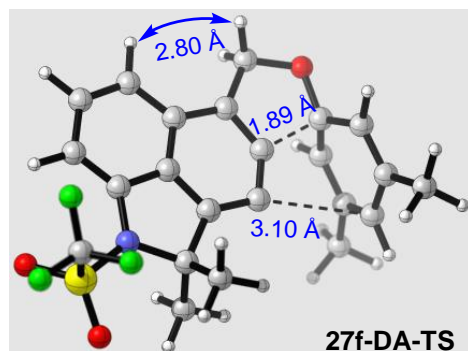

One imaginary frequency:  $-210.03 \text{ cm}^{-1}$   
 Thermal correction to Gibbs Free Energy=  $0.324869$   
 Sum of electronic and thermal Free Energies=  $-1866.143613$   
 $E[\text{SMD}(\text{chlorobenzene})/\text{B3LYP-D3BJ}/6-311+\text{G}(\text{d,p})] = -1867.00076976$

| Center Number | Atomic Number | Atomic Type | Coordinates (Angstroms) |   |   |
|---------------|---------------|-------------|-------------------------|---|---|
|               |               |             | X                       | Y | Z |

|    |    |   |           |           |           |
|----|----|---|-----------|-----------|-----------|
| 1  | 6  | 0 | -1.626770 | 1.152157  | -0.396204 |
| 2  | 6  | 0 | -0.232373 | 1.068918  | -0.212951 |
| 3  | 6  | 0 | 0.592405  | 2.209193  | -0.044254 |
| 4  | 6  | 0 | -0.062268 | 3.474578  | -0.061812 |
| 5  | 6  | 0 | -1.431921 | 3.533285  | -0.241342 |
| 6  | 6  | 0 | -2.251044 | 2.381177  | -0.414933 |
| 7  | 6  | 0 | 0.232496  | -0.264869 | -0.239990 |
| 8  | 6  | 0 | 1.585301  | -0.504556 | -0.090469 |
| 9  | 6  | 0 | 2.309564  | 0.598249  | 0.087617  |
| 10 | 6  | 0 | 1.986455  | 1.932386  | 0.119396  |
| 11 | 7  | 0 | -2.104408 | -0.191328 | -0.529104 |
| 12 | 6  | 0 | -0.942245 | -1.214342 | -0.476227 |
| 13 | 6  | 0 | -0.797577 | -1.933385 | -1.823947 |
| 14 | 6  | 0 | -1.101288 | -2.202064 | 0.683516  |
| 15 | 16 | 0 | -3.694078 | -0.580874 | -0.707349 |
| 16 | 8  | 0 | -4.382105 | 0.461494  | -1.467119 |
| 17 | 8  | 0 | -3.808877 | -1.992470 | -1.064456 |
| 18 | 6  | 0 | -4.423939 | -0.448065 | 1.020008  |
| 19 | 9  | 0 | -4.216150 | 0.776154  | 1.512128  |
| 20 | 9  | 0 | -5.736316 | -0.677439 | 0.942923  |
| 21 | 9  | 0 | -3.869150 | -1.348045 | 1.834006  |
| 22 | 6  | 0 | 3.125829  | 2.888926  | 0.287218  |
| 23 | 8  | 0 | 4.301339  | 2.102080  | 0.588457  |
| 24 | 6  | 0 | 4.172950  | 0.736744  | 0.352402  |
| 25 | 6  | 0 | 4.305758  | -0.120644 | 1.496983  |
| 26 | 6  | 0 | 4.314039  | -1.486483 | 1.315166  |
| 27 | 6  | 0 | 4.310419  | -1.971033 | -0.014724 |
| 28 | 6  | 0 | 4.560172  | -1.145942 | -1.135273 |
| 29 | 6  | 0 | 4.550919  | 0.219255  | -0.936613 |
| 30 | 6  | 0 | 4.751521  | -1.754148 | -2.501357 |
| 31 | 6  | 0 | 4.257974  | -2.448943 | 2.473794  |
| 32 | 1  | 0 | 0.510145  | 4.388800  | 0.062068  |
| 33 | 1  | 0 | -1.919787 | 4.503818  | -0.255083 |
| 34 | 1  | 0 | -3.317410 | 2.492314  | -0.558965 |
| 35 | 1  | 0 | 0.144441  | -2.490505 | -1.816313 |
| 36 | 1  | 0 | -1.618139 | -2.631533 | -1.998556 |
| 37 | 1  | 0 | -0.760145 | -1.213017 | -2.646112 |
| 38 | 1  | 0 | -0.183756 | -2.794352 | 0.750284  |
| 39 | 1  | 0 | -1.236088 | -1.678445 | 1.633063  |
| 40 | 1  | 0 | -1.940095 | -2.882865 | 0.523874  |
| 41 | 1  | 0 | 4.249237  | 0.329233  | 2.482993  |
| 42 | 1  | 0 | 4.248773  | -3.046078 | -0.170454 |
| 43 | 1  | 0 | 4.678186  | 0.917805  | -1.758021 |
| 44 | 1  | 0 | 5.490002  | -2.562400 | -2.482204 |
| 45 | 1  | 0 | 3.809094  | -2.181612 | -2.864881 |
| 46 | 1  | 0 | 5.081328  | -1.005559 | -3.226467 |

|    |   |   |          |           |           |
|----|---|---|----------|-----------|-----------|
| 47 | 1 | 0 | 5.033180 | -3.218497 | 2.394585  |
| 48 | 1 | 0 | 4.386130 | -1.929942 | 3.427210  |
| 49 | 1 | 0 | 3.289627 | -2.963154 | 2.497497  |
| 50 | 1 | 0 | 2.981937 | 3.591300  | 1.116628  |
| 51 | 1 | 0 | 3.302870 | 3.480750  | -0.622426 |

---

**27f-ene**

Thermal correction to Gibbs Free Energy= 0.332044

Sum of electronic and thermal Free Energies= -1866.233065

E[SMD(chlorobenzene)/B3LYP-D3BJ/6-311+G(d,p)] = -1867.09638085

---

| Center<br>Number | Atomic<br>Number | Atomic<br>Type | Coordinates (Angstroms) |           |           |
|------------------|------------------|----------------|-------------------------|-----------|-----------|
|                  |                  |                | X                       | Y         | Z         |
| 1                | 6                | 0              | 1.824031                | 1.116542  | 0.252450  |
| 2                | 6                | 0              | 0.438011                | 0.865912  | 0.244841  |
| 3                | 6                | 0              | -0.533554               | 1.849234  | -0.027968 |
| 4                | 6                | 0              | -0.035316               | 3.152761  | -0.316030 |
| 5                | 6                | 0              | 1.328527                | 3.384214  | -0.311407 |
| 6                | 6                | 0              | 2.295833                | 2.381043  | -0.026832 |
| 7                | 6                | 0              | 0.140954                | -0.464428 | 0.571841  |
| 8                | 6                | 0              | -1.172992               | -0.863711 | 0.604892  |
| 9                | 6                | 0              | -2.195806               | 0.082860  | 0.290391  |
| 10               | 6                | 0              | -1.895567               | 1.414019  | 0.019659  |
| 11               | 7                | 0              | 2.464060                | -0.118806 | 0.576528  |
| 12               | 6                | 0              | 1.425431                | -1.232953 | 0.858901  |
| 13               | 6                | 0              | 1.495323                | -1.660721 | 2.332020  |
| 14               | 6                | 0              | 1.594005                | -2.423191 | -0.091424 |
| 15               | 16               | 0              | 4.101088                | -0.314334 | 0.629038  |
| 16               | 8                | 0              | 4.732818                | 0.920425  | 1.088498  |
| 17               | 8                | 0              | 4.410346                | -1.607771 | 1.231698  |
| 18               | 6                | 0              | 4.625735                | -0.463154 | -1.170434 |
| 19               | 9                | 0              | 4.238127                | 0.618857  | -1.850322 |
| 20               | 9                | 0              | 5.954898                | -0.563426 | -1.214037 |
| 21               | 9                | 0              | 4.084187                | -1.548767 | -1.725315 |
| 22               | 6                | 0              | -3.020538               | 2.397260  | -0.180829 |
| 23               | 8                | 0              | -4.210196               | 2.021720  | 0.538887  |
| 24               | 6                | 0              | -4.649299               | 0.760669  | 0.269657  |
| 25               | 6                | 0              | -3.641561               | -0.377103 | 0.329821  |
| 26               | 6                | 0              | -4.062374               | -1.491629 | -0.637546 |
| 27               | 6                | 0              | -5.497257               | -1.792554 | -0.581806 |
| 28               | 6                | 0              | -6.407202               | -0.854565 | -0.214693 |
| 29               | 6                | 0              | -5.958011               | 0.503837  | 0.092818  |
| 30               | 6                | 0              | -7.887397               | -1.125765 | -0.209322 |

|    |   |   |           |           |           |
|----|---|---|-----------|-----------|-----------|
| 31 | 6 | 0 | -3.228849 | -2.174553 | -1.440466 |
| 32 | 1 | 0 | -0.713792 | 3.967143  | -0.546461 |
| 33 | 1 | 0 | 1.691512  | 4.383504  | -0.533719 |
| 34 | 1 | 0 | 3.349672  | 2.623971  | -0.029207 |
| 35 | 1 | 0 | -1.454114 | -1.880279 | 0.860689  |
| 36 | 1 | 0 | 0.652725  | -2.325449 | 2.546755  |
| 37 | 1 | 0 | 2.422008  | -2.196153 | 2.544580  |
| 38 | 1 | 0 | 1.423762  | -0.792587 | 2.992855  |
| 39 | 1 | 0 | 0.769806  | -3.122241 | 0.079420  |
| 40 | 1 | 0 | 1.559684  | -2.102803 | -1.135155 |
| 41 | 1 | 0 | 2.530123  | -2.953570 | 0.093681  |
| 42 | 1 | 0 | -5.828888 | -2.765192 | -0.937722 |
| 43 | 1 | 0 | -6.680875 | 1.312897  | 0.141971  |
| 44 | 1 | 0 | -8.414320 | -0.443375 | -0.888510 |
| 45 | 1 | 0 | -8.111275 | -2.151888 | -0.513248 |
| 46 | 1 | 0 | -8.313567 | -0.962978 | 0.788935  |
| 47 | 1 | 0 | -3.603674 | -2.996640 | -2.044977 |
| 48 | 1 | 0 | -2.174634 | -1.941378 | -1.530972 |
| 49 | 1 | 0 | -2.754015 | 3.381174  | 0.210349  |
| 50 | 1 | 0 | -3.270738 | 2.514408  | -1.245386 |
| 51 | 1 | 0 | -3.796642 | -0.826691 | 1.328992  |

**27f**

Thermal correction to Gibbs Free Energy= 0.331793

Sum of electronic and thermal Free Energies= -1866.295931

E[SMD(chlorobenzene)/B3LYP-D3BJ/6-311+G(d,p)] = -1867.15414149

| Center<br>Number | Atomic<br>Number | Atomic<br>Type | Coordinates (Angstroms) |           |           |
|------------------|------------------|----------------|-------------------------|-----------|-----------|
|                  |                  |                | X                       | Y         | Z         |
| 1                | 6                | 0              | 1.826129                | 1.097686  | 0.286628  |
| 2                | 6                | 0              | 0.442774                | 0.871771  | 0.147116  |
| 3                | 6                | 0              | -0.499746               | 1.893005  | -0.091225 |
| 4                | 6                | 0              | 0.032278                | 3.211942  | -0.208066 |
| 5                | 6                | 0              | 1.392726                | 3.418385  | -0.077543 |
| 6                | 6                | 0              | 2.328573                | 2.375693  | 0.176165  |
| 7                | 6                | 0              | 0.106939                | -0.476838 | 0.311932  |
| 8                | 6                | 0              | -1.208430               | -0.863266 | 0.215083  |
| 9                | 6                | 0              | -2.207174               | 0.119367  | -0.078427 |
| 10               | 6                | 0              | -1.856870               | 1.473483  | -0.189518 |
| 11               | 7                | 0              | 2.426234                | -0.175430 | 0.532357  |
| 12               | 6                | 0              | 1.357418                | -1.293304 | 0.618276  |
| 13               | 6                | 0              | 1.302615                | -1.868540 | 2.040940  |
| 14               | 6                | 0              | 1.592851                | -2.382431 | -0.433765 |
| 15               | 16               | 0              | 4.048251                | -0.400935 | 0.724421  |



|    |   |   |           |           |           |
|----|---|---|-----------|-----------|-----------|
| 16 | 8 | 0 | 4.639369  | 0.764862  | 1.377426  |
| 17 | 8 | 0 | 4.289974  | -1.758232 | 1.205777  |
| 18 | 6 | 0 | 4.745766  | -0.361733 | -1.020765 |
| 19 | 9 | 0 | 4.472104  | 0.811484  | -1.596332 |
| 20 | 9 | 0 | 6.067623  | -0.523684 | -0.948234 |
| 21 | 9 | 0 | 4.221569  | -1.344755 | -1.754781 |
| 22 | 6 | 0 | -2.982852 | 2.449068  | -0.394919 |
| 23 | 8 | 0 | -4.116616 | 2.080837  | 0.407078  |
| 24 | 6 | 0 | -4.560672 | 0.809464  | 0.166481  |
| 25 | 6 | 0 | -3.648964 | -0.220620 | -0.171962 |
| 26 | 6 | 0 | -4.196838 | -1.482008 | -0.521234 |
| 27 | 6 | 0 | -5.579539 | -1.677414 | -0.413971 |
| 28 | 6 | 0 | -6.456729 | -0.678526 | 0.024247  |
| 29 | 6 | 0 | -5.928348 | 0.584883  | 0.296893  |
| 30 | 6 | 0 | -7.932529 | -0.950115 | 0.178558  |
| 31 | 6 | 0 | -3.377087 | -2.636488 | -1.058201 |
| 32 | 1 | 0 | -0.618613 | 4.057304  | -0.403358 |
| 33 | 1 | 0 | 1.780217  | 4.429055  | -0.168174 |
| 34 | 1 | 0 | 3.380790  | 2.602727  | 0.280943  |
| 35 | 1 | 0 | -1.494152 | -1.891861 | 0.386489  |
| 36 | 1 | 0 | 0.433544  | -2.528708 | 2.121443  |
| 37 | 1 | 0 | 2.199376  | -2.446141 | 2.270295  |
| 38 | 1 | 0 | 1.193182  | -1.068612 | 2.778248  |
| 39 | 1 | 0 | 0.753759  | -3.083869 | -0.400703 |
| 40 | 1 | 0 | 1.642661  | -1.955919 | -1.438269 |
| 41 | 1 | 0 | 2.508709  | -2.941680 | -0.232476 |
| 42 | 1 | 0 | -5.985927 | -2.646723 | -0.692059 |
| 43 | 1 | 0 | -6.566584 | 1.414854  | 0.584842  |
| 44 | 1 | 0 | -8.532973 | -0.078957 | -0.101940 |
| 45 | 1 | 0 | -8.249823 | -1.797987 | -0.435578 |
| 46 | 1 | 0 | -8.179651 | -1.189946 | 1.220793  |
| 47 | 1 | 0 | -4.006174 | -3.274731 | -1.685444 |
| 48 | 1 | 0 | -2.530856 | -2.301359 | -1.663086 |
| 49 | 1 | 0 | -2.980273 | -3.273425 | -0.258153 |
| 50 | 1 | 0 | -2.717819 | 3.457201  | -0.074227 |
| 51 | 1 | 0 | -3.292271 | 2.493827  | -1.451274 |

**27f-DA**

Thermal correction to Gibbs Free Energy= 0.332166

Sum of electronic and thermal Free Energies= -1866.217687

E[SMD(chlorobenzene)/B3LYP-D3BJ/6-311+G(d,p)] = -1867.08232050

---

| Center<br>Number | Atomic<br>Number | Atomic<br>Type | Coordinates (Angstroms) |   |   |
|------------------|------------------|----------------|-------------------------|---|---|
|                  |                  |                | X                       | Y | Z |

---

|    |    |   |           |           |           |
|----|----|---|-----------|-----------|-----------|
| 1  | 6  | 0 | -1.409650 | 1.223298  | -0.424295 |
| 2  | 6  | 0 | -0.016138 | 1.152342  | -0.235634 |
| 3  | 6  | 0 | 0.784301  | 2.319673  | -0.076086 |
| 4  | 6  | 0 | 0.113453  | 3.569362  | -0.114850 |
| 5  | 6  | 0 | -1.257058 | 3.609841  | -0.305015 |
| 6  | 6  | 0 | -2.052007 | 2.445591  | -0.465226 |
| 7  | 6  | 0 | 0.440656  | -0.196230 | -0.237080 |
| 8  | 6  | 0 | 1.790235  | -0.417295 | -0.066346 |
| 9  | 6  | 0 | 2.556025  | 0.748498  | 0.095130  |
| 10 | 6  | 0 | 2.175266  | 2.051475  | 0.103048  |
| 11 | 7  | 0 | -1.891469 | -0.119323 | -0.534982 |
| 12 | 6  | 0 | -0.734601 | -1.141941 | -0.461982 |
| 13 | 6  | 0 | -0.600086 | -1.881514 | -1.802103 |
| 14 | 6  | 0 | -0.911787 | -2.113584 | 0.711382  |
| 15 | 16 | 0 | -3.484335 | -0.509633 | -0.706299 |
| 16 | 8  | 0 | -4.166907 | 0.515471  | -1.492653 |
| 17 | 8  | 0 | -3.600443 | -1.928899 | -1.031031 |
| 18 | 6  | 0 | -4.216349 | -0.337349 | 1.017391  |
| 19 | 9  | 0 | -4.010828 | 0.897218  | 1.482118  |
| 20 | 9  | 0 | -5.527427 | -0.571012 | 0.942140  |
| 21 | 9  | 0 | -3.660135 | -1.218804 | 1.850248  |
| 22 | 6  | 0 | 3.428672  | 2.875367  | 0.310012  |
| 23 | 8  | 0 | 4.519120  | 1.912302  | 0.419477  |
| 24 | 6  | 0 | 4.027266  | 0.578838  | 0.285828  |
| 25 | 6  | 0 | 4.156447  | -0.345615 | 1.502848  |
| 26 | 6  | 0 | 3.482005  | -1.495396 | 1.365800  |
| 27 | 6  | 0 | 2.749590  | -1.623983 | 0.000642  |
| 28 | 6  | 0 | 3.815396  | -1.369492 | -1.101983 |
| 29 | 6  | 0 | 4.486498  | -0.221282 | -0.939399 |
| 30 | 6  | 0 | 3.993891  | -2.368533 | -2.203579 |
| 31 | 6  | 0 | 3.373594  | -2.600919 | 2.370560  |
| 32 | 1  | 0 | 0.676507  | 4.490224  | 0.001804  |
| 33 | 1  | 0 | -1.758571 | 4.572779  | -0.336574 |
| 34 | 1  | 0 | -3.118774 | 2.535247  | -0.617792 |
| 35 | 1  | 0 | 0.304039  | -2.497051 | -1.778468 |
| 36 | 1  | 0 | -1.456467 | -2.533124 | -1.981868 |
| 37 | 1  | 0 | -0.510761 | -1.171865 | -2.629089 |
| 38 | 1  | 0 | -0.020780 | -2.744189 | 0.777440  |
| 39 | 1  | 0 | -1.021231 | -1.576055 | 1.656082  |
| 40 | 1  | 0 | -1.775600 | -2.764474 | 0.563672  |
| 41 | 1  | 0 | 4.718457  | -0.040002 | 2.379461  |
| 42 | 1  | 0 | 2.255408  | -2.589233 | -0.115622 |
| 43 | 1  | 0 | 5.256984  | 0.162864  | -1.600008 |
| 44 | 1  | 0 | 4.264127  | -3.355539 | -1.806000 |
| 45 | 1  | 0 | 3.064377  | -2.502812 | -2.772482 |
| 46 | 1  | 0 | 4.776354  | -2.057212 | -2.901641 |

|    |   |   |          |           |           |
|----|---|---|----------|-----------|-----------|
| 47 | 1 | 0 | 3.751388 | -3.547841 | 1.963242  |
| 48 | 1 | 0 | 3.938449 | -2.371848 | 3.278862  |
| 49 | 1 | 0 | 2.327799 | -2.776673 | 2.655428  |
| 50 | 1 | 0 | 3.397786 | 3.478997  | 1.227032  |
| 51 | 1 | 0 | 3.637791 | 3.552669  | -0.529074 |

**27g-benz**

Thermal correction to Gibbs Free Energy= 0.373764

Sum of electronic and thermal Free Energies= -1944.742571

E[SMD(chlorobenzene)/B3LYP-D3BJ/6-311+G(d,p)] = -1945.67167129

| Center<br>Number | Atomic<br>Number | Atomic<br>Type | Coordinates (Angstroms) |           |           |
|------------------|------------------|----------------|-------------------------|-----------|-----------|
|                  |                  |                | X                       | Y         | Z         |
| 1                | 6                | 0              | -1.413787               | 2.848769  | -0.745691 |
| 2                | 6                | 0              | -2.588029               | 2.047998  | -0.725157 |
| 3                | 6                | 0              | -0.137387               | 2.344517  | -0.585194 |
| 4                | 1                | 0              | -1.535018               | 3.917357  | -0.898364 |
| 5                | 6                | 0              | -2.419191               | 0.696106  | -0.530105 |
| 6                | 1                | 0              | -3.559203               | 2.503094  | -0.863633 |
| 7                | 6                | 0              | 0.067598                | 0.944368  | -0.385054 |
| 8                | 1                | 0              | 0.702632                | 3.027092  | -0.614377 |
| 9                | 6                | 0              | -1.124091               | 0.156298  | -0.364516 |
| 10               | 7                | 0              | -3.341805               | -0.394804 | -0.441353 |
| 11               | 6                | 0              | 1.337825                | 0.251357  | -0.206442 |
| 12               | 6                | 0              | -1.185955               | -1.246461 | -0.189956 |
| 13               | 6                | 0              | -2.618127               | -1.747117 | -0.254667 |
| 14               | 16               | 0              | -4.980544               | -0.215961 | -0.536136 |
| 15               | 6                | 0              | 1.063302                | -1.073899 | -0.050681 |
| 16               | 6                | 0              | 2.745249                | 0.827231  | -0.196878 |
| 17               | 6                | 0              | 0.051499                | -1.831812 | -0.025825 |
| 18               | 6                | 0              | -3.025071               | -2.448045 | 1.046207  |
| 19               | 6                | 0              | -2.823714               | -2.647677 | -1.481593 |
| 20               | 8                | 0              | -5.307753               | 0.885823  | -1.438092 |
| 21               | 8                | 0              | -5.597611               | -1.531980 | -0.672264 |
| 22               | 6                | 0              | -5.494394               | 0.401343  | 1.164187  |
| 23               | 6                | 0              | 2.950740                | 1.811177  | 0.962304  |
| 24               | 8                | 0              | 3.540311                | -0.385464 | 0.019282  |
| 25               | 6                | 0              | 3.102888                | 1.461057  | -1.547761 |
| 26               | 1                | 0              | -2.379548               | -3.321063 | 1.180500  |
| 27               | 1                | 0              | -2.893161               | -1.790166 | 1.908340  |
| 28               | 1                | 0              | -4.060508               | -2.791927 | 1.007803  |
| 29               | 1                | 0              | -2.149588               | -3.505925 | -1.401009 |
| 30               | 1                | 0              | -3.850174               | -3.013049 | -1.536929 |

|    |   |   |           |           |           |
|----|---|---|-----------|-----------|-----------|
| 31 | 1 | 0 | -2.584366 | -2.109453 | -2.402808 |
| 32 | 9 | 0 | -6.806851 | 0.637164  | 1.145632  |
| 33 | 9 | 0 | -5.224981 | -0.516895 | 2.093160  |
| 34 | 9 | 0 | -4.843651 | 1.529505  | 1.458211  |
| 35 | 1 | 0 | 3.989073  | 2.152008  | 0.992037  |
| 36 | 1 | 0 | 2.313577  | 2.690329  | 0.843450  |
| 37 | 1 | 0 | 2.706264  | 1.337696  | 1.916870  |
| 38 | 6 | 0 | 4.917678  | -0.316626 | 0.123446  |
| 39 | 1 | 0 | 4.139003  | 1.809636  | -1.542955 |
| 40 | 1 | 0 | 2.976222  | 0.736445  | -2.356533 |
| 41 | 1 | 0 | 2.461299  | 2.320381  | -1.755049 |
| 42 | 6 | 0 | 5.710803  | -0.473575 | -1.015973 |
| 43 | 6 | 0 | 5.509377  | -0.210770 | 1.386867  |
| 44 | 6 | 0 | 7.107769  | -0.498965 | -0.906063 |
| 45 | 1 | 0 | 5.232587  | -0.588030 | -1.983760 |
| 46 | 6 | 0 | 6.902026  | -0.239094 | 1.519006  |
| 47 | 1 | 0 | 4.873981  | -0.122757 | 2.262526  |
| 48 | 6 | 0 | 7.684481  | -0.376286 | 0.363683  |
| 49 | 6 | 0 | 7.967251  | -0.642058 | -2.139951 |
| 50 | 6 | 0 | 7.546235  | -0.163051 | 2.883124  |
| 51 | 1 | 0 | 8.767831  | -0.398478 | 0.457546  |
| 52 | 1 | 0 | 7.982121  | 0.287124  | -2.723348 |
| 53 | 1 | 0 | 9.001495  | -0.884854 | -1.880213 |
| 54 | 1 | 0 | 7.588956  | -1.428852 | -2.801386 |
| 55 | 1 | 0 | 8.547011  | 0.276101  | 2.828912  |
| 56 | 1 | 0 | 6.947452  | 0.434769  | 3.577071  |
| 57 | 1 | 0 | 7.653334  | -1.162182 | 3.324613  |

### 27g-ene-TS

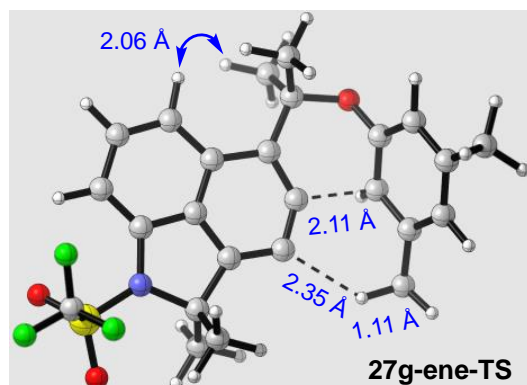

One imaginary frequency:  $-155.84 \text{ cm}^{-1}$   
 Thermal correction to Gibbs Free Energy=  $0.378926$   
 Sum of electronic and thermal Free Energies=  $-1944.732231$   
 $E[\text{SMD}(\text{chlorobenzene})/\text{B3LYP-D3BJ}/6\text{-}311+\text{G}(\text{d},\text{p})] = -1945.67063229$

| Center<br>Number | Atomic<br>Number | Atomic<br>Type | Coordinates (Angstroms) |           |           |
|------------------|------------------|----------------|-------------------------|-----------|-----------|
|                  |                  |                | X                       | Y         | Z         |
| 1                | 6                | 0              | -1.904350               | 1.044037  | -0.298631 |
| 2                | 6                | 0              | -0.524350               | 0.758707  | -0.406043 |
| 3                | 6                | 0              | -2.333490               | 2.322233  | -0.028058 |
| 4                | 7                | 0              | -2.601584               | -0.188801 | -0.505296 |
| 5                | 6                | 0              | 0.500085                | 1.731002  | -0.249681 |
| 6                | 6                | 0              | -0.302062               | -0.602220 | -0.681765 |
| 7                | 6                | 0              | -1.325990               | 3.310981  | 0.136711  |
| 8                | 1                | 0              | -3.378744               | 2.586254  | 0.057532  |
| 9                | 6                | 0              | -1.626412               | -1.348314 | -0.806578 |
| 10               | 16               | 0              | -4.242350               | -0.331979 | -0.446936 |
| 11               | 6                | 0              | 0.027333                | 3.051995  | 0.036309  |
| 12               | 6                | 0              | 1.874428                | 1.270968  | -0.391552 |
| 13               | 6                | 0              | 1.005216                | -1.024865 | -0.800298 |
| 14               | 1                | 0              | -1.644689               | 4.326592  | 0.353549  |
| 15               | 6                | 0              | -1.823650               | -1.866175 | -2.237803 |
| 16               | 6                | 0              | -1.733221               | -2.471885 | 0.228863  |
| 17               | 8                | 0              | -4.871263               | 0.895736  | -0.930385 |
| 18               | 8                | 0              | -4.629365               | -1.644449 | -0.957196 |
| 19               | 6                | 0              | -4.657285               | -0.373864 | 1.385998  |
| 20               | 1                | 0              | 0.714007                | 3.874404  | 0.181909  |
| 21               | 6                | 0              | 1.911570                | -0.087079 | -0.644545 |
| 22               | 6                | 0              | 3.069807                | 2.219123  | -0.251812 |
| 23               | 1                | 0              | 2.242113                | -2.926805 | -1.413256 |
| 24               | 1                | 0              | -0.994154               | -2.538273 | -2.478269 |
| 25               | 1                | 0              | -2.761555               | -2.414265 | -2.340138 |
| 26               | 1                | 0              | -1.811756               | -1.040343 | -2.954810 |
| 27               | 1                | 0              | -0.921859               | -3.182078 | 0.044030  |
| 28               | 1                | 0              | -1.620138               | -2.083973 | 1.244048  |
| 29               | 1                | 0              | -2.682544               | -3.005833 | 0.148867  |
| 30               | 9                | 0              | -4.210478               | 0.733599  | 1.983975  |
| 31               | 9                | 0              | -5.983518               | -0.443576 | 1.515742  |
| 32               | 9                | 0              | -4.103097               | -1.439836 | 1.966194  |
| 33               | 6                | 0              | 3.891490                | -0.739304 | -0.998272 |
| 34               | 8                | 0              | 4.345193                | 1.532158  | -0.530601 |
| 35               | 6                | 0              | 3.185231                | 2.780276  | 1.173768  |
| 36               | 6                | 0              | 3.069045                | 3.322509  | -1.316963 |
| 37               | 6                | 0              | 3.331409                | -3.124720 | -1.508882 |
| 38               | 6                | 0              | 4.473634                | 0.234195  | -0.151749 |
| 39               | 6                | 0              | 4.015985                | -2.118696 | -0.653289 |
| 40               | 1                | 0              | 3.704002                | -0.467485 | -2.032434 |
| 41               | 1                | 0              | 4.073906                | 3.414615  | 1.241727  |
| 42               | 1                | 0              | 2.313331                | 3.375805  | 1.450110  |
| 43               | 1                | 0              | 3.276536                | 1.966540  | 1.898443  |

|    |   |   |          |           |           |
|----|---|---|----------|-----------|-----------|
| 44 | 1 | 0 | 3.020571 | 2.880997  | -2.315879 |
| 45 | 1 | 0 | 2.230472 | 4.009540  | -1.202196 |
| 46 | 1 | 0 | 3.997278 | 3.895517  | -1.235075 |
| 47 | 1 | 0 | 3.541965 | -4.152721 | -1.204180 |
| 48 | 1 | 0 | 3.573294 | -3.003046 | -2.570158 |
| 49 | 6 | 0 | 5.128199 | -0.125322 | 1.020359  |
| 50 | 6 | 0 | 4.662467 | -2.454523 | 0.530871  |
| 51 | 6 | 0 | 5.239499 | -1.479851 | 1.367073  |
| 52 | 1 | 0 | 5.555809 | 0.647099  | 1.651086  |
| 53 | 1 | 0 | 4.746076 | -3.502027 | 0.809175  |
| 54 | 6 | 0 | 5.932214 | -1.888002 | 2.640582  |
| 55 | 1 | 0 | 5.202531 | -2.028492 | 3.448588  |
| 56 | 1 | 0 | 6.463161 | -2.836900 | 2.518302  |
| 57 | 1 | 0 | 6.645568 | -1.128325 | 2.971657  |

**27g-DA-TS**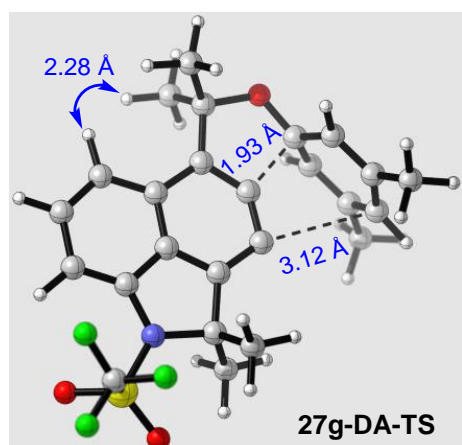

One imaginary frequency:  $-185.52 \text{ cm}^{-1}$   
 Thermal correction to Gibbs Free Energy= 0.377509  
 Sum of electronic and thermal Free Energies=  $-1944.733085$   
 $E[\text{SMD}(\text{chlorobenzene})/\text{B3LYP-D3BJ}/6\text{-}311+\text{G}(\text{d,p})] = -1945.67194673$

| Center Number | Atomic Number | Atomic Type | Coordinates (Angstroms) |           |           |
|---------------|---------------|-------------|-------------------------|-----------|-----------|
|               |               |             | X                       | Y         | Z         |
| 1             | 6             | 0           | -1.745939               | 1.068081  | -0.444702 |
| 2             | 6             | 0           | -0.359892               | 0.864441  | -0.283225 |
| 3             | 6             | 0           | 0.572091                | 1.927143  | -0.149370 |
| 4             | 6             | 0           | 0.021472                | 3.243351  | -0.187671 |
| 5             | 6             | 0           | -1.340031               | 3.420251  | -0.348573 |
| 6             | 6             | 0           | -2.262137               | 2.344734  | -0.482000 |
| 7             | 6             | 0           | -0.025003               | -0.507372 | -0.281426 |
| 8             | 6             | 0           | 1.299940                | -0.867454 | -0.135107 |

|    |    |   |           |           |           |
|----|----|---|-----------|-----------|-----------|
| 9  | 6  | 0 | 2.121598  | 0.165953  | -0.009383 |
| 10 | 6  | 0 | 1.946068  | 1.527353  | 0.003983  |
| 11 | 7  | 0 | -2.346624 | -0.228955 | -0.535718 |
| 12 | 6  | 0 | -1.283186 | -1.351165 | -0.478371 |
| 13 | 6  | 0 | -1.225025 | -2.105846 | -1.813324 |
| 14 | 6  | 0 | -1.509081 | -2.298356 | 0.703732  |
| 15 | 16 | 0 | -3.967108 | -0.477945 | -0.686623 |
| 16 | 8  | 0 | -4.570290 | 0.602984  | -1.464291 |
| 17 | 8  | 0 | -4.211590 | -1.881964 | -1.006512 |
| 18 | 6  | 0 | -4.661807 | -0.243277 | 1.044480  |
| 19 | 9  | 0 | -4.377841 | 0.982180  | 1.493296  |
| 20 | 9  | 0 | -5.986311 | -0.398717 | 0.990585  |
| 21 | 9  | 0 | -4.148985 | -1.147370 | 1.881472  |
| 22 | 6  | 0 | 3.174646  | 2.396260  | 0.169837  |
| 23 | 8  | 0 | 4.310428  | 1.465654  | 0.273315  |
| 24 | 6  | 0 | 4.034162  | 0.110726  | 0.212360  |
| 25 | 6  | 0 | 4.046123  | -0.634028 | 1.438860  |
| 26 | 6  | 0 | 3.901521  | -2.006379 | 1.400972  |
| 27 | 6  | 0 | 3.858937  | -2.626462 | 0.132065  |
| 28 | 6  | 0 | 4.191579  | -1.952020 | -1.064455 |
| 29 | 6  | 0 | 4.334370  | -0.580188 | -1.008801 |
| 30 | 6  | 0 | 3.453024  | 3.283922  | -1.048549 |
| 31 | 6  | 0 | 3.163593  | 3.213441  | 1.467493  |
| 32 | 6  | 0 | 4.315245  | -2.715258 | -2.358807 |
| 33 | 6  | 0 | 3.727906  | -2.824628 | 2.655229  |
| 34 | 1  | 0 | 0.664403  | 4.111443  | -0.096431 |
| 35 | 1  | 0 | -1.736704 | 4.431166  | -0.378095 |
| 36 | 1  | 0 | -3.316963 | 2.545557  | -0.612111 |
| 37 | 1  | 0 | -0.337450 | -2.746145 | -1.807457 |
| 38 | 1  | 0 | -2.108603 | -2.728839 | -1.962371 |
| 39 | 1  | 0 | -1.135018 | -1.407224 | -2.650084 |
| 40 | 1  | 0 | -0.644472 | -2.965446 | 0.770683  |
| 41 | 1  | 0 | -1.584934 | -1.745963 | 1.643419  |
| 42 | 1  | 0 | -2.405584 | -2.907478 | 0.569492  |
| 43 | 1  | 0 | 4.042620  | -0.084718 | 2.374899  |
| 44 | 1  | 0 | 3.686838  | -3.699981 | 0.088063  |
| 45 | 1  | 0 | 4.542276  | 0.009246  | -1.896021 |
| 46 | 1  | 0 | 2.678351  | 4.046514  | -1.165974 |
| 47 | 1  | 0 | 4.416438  | 3.788194  | -0.924962 |
| 48 | 1  | 0 | 3.486445  | 2.685699  | -1.963197 |
| 49 | 1  | 0 | 2.383134  | 3.978874  | 1.445650  |
| 50 | 1  | 0 | 2.985265  | 2.566130  | 2.330548  |
| 51 | 1  | 0 | 4.129595  | 3.711127  | 1.597348  |
| 52 | 1  | 0 | 4.976351  | -3.581875 | -2.253101 |
| 53 | 1  | 0 | 3.334996  | -3.090039 | -2.677480 |
| 54 | 1  | 0 | 4.706885  | -2.080649 | -3.157938 |

|    |   |   |          |           |          |
|----|---|---|----------|-----------|----------|
| 55 | 1 | 0 | 4.395786 | -3.692443 | 2.665295 |
| 56 | 1 | 0 | 3.928252 | -2.227862 | 3.548881 |
| 57 | 1 | 0 | 2.700993 | -3.203050 | 2.727197 |

---

**27g**

Thermal correction to Gibbs Free Energy= 0.383965

Sum of electronic and thermal Free Energies= -1944.809803

E[SMD(chlorobenzene)/B3LYP-D3BJ/6-311+G(d,p)] = -1945.75499427

---

| Center<br>Number | Atomic<br>Number | Atomic<br>Type | Coordinates (Angstroms) |           |           |
|------------------|------------------|----------------|-------------------------|-----------|-----------|
|                  |                  |                | X                       | Y         | Z         |
| 1                | 6                | 0              | -1.505617               | 1.166329  | -0.454256 |
| 2                | 6                | 0              | -0.129680               | 0.925192  | -0.274788 |
| 3                | 6                | 0              | 0.816939                | 1.984014  | -0.158260 |
| 4                | 6                | 0              | 0.303527                | 3.306188  | -0.226924 |
| 5                | 6                | 0              | -1.053317               | 3.514625  | -0.404342 |
| 6                | 6                | 0              | -1.991103               | 2.457209  | -0.523940 |
| 7                | 6                | 0              | 0.149913                | -0.469792 | -0.238401 |
| 8                | 6                | 0              | 1.460805                | -0.856631 | -0.071460 |
| 9                | 6                | 0              | 2.375166                | 0.204036  | 0.040114  |
| 10               | 6                | 0              | 2.168656                | 1.545569  | 0.011995  |
| 11               | 7                | 0              | -2.154831               | -0.106885 | -0.524122 |
| 12               | 6                | 0              | -1.136650               | -1.265660 | -0.428367 |
| 13               | 6                | 0              | -1.105638               | -2.052015 | -1.748172 |
| 14               | 6                | 0              | -1.428670               | -2.172951 | 0.772722  |
| 15               | 16               | 0              | -3.783760               | -0.297431 | -0.694199 |
| 16               | 8                | 0              | -4.330536               | 0.780280  | -1.515606 |
| 17               | 8                | 0              | -4.077291               | -1.700442 | -0.975187 |
| 18               | 6                | 0              | -4.495076               | 0.015938  | 1.018310  |
| 19               | 9                | 0              | -4.181256               | 1.245837  | 1.431921  |
| 20               | 9                | 0              | -5.822007               | -0.103238 | 0.947498  |
| 21               | 9                | 0              | -4.020693               | -0.875973 | 1.890111  |
| 22               | 6                | 0              | 3.526484                | 2.228709  | 0.179279  |
| 23               | 8                | 0              | 4.479611                | 1.099345  | 0.294088  |
| 24               | 6                | 0              | 3.813592                | -0.155125 | 0.218881  |
| 25               | 6                | 0              | 3.836886                | -1.045513 | 1.468949  |
| 26               | 6                | 0              | 3.012656                | -2.098406 | 1.384695  |
| 27               | 6                | 0              | 2.248998                | -2.177242 | 0.033342  |
| 28               | 6                | 0              | 3.321155                | -2.111276 | -1.088759 |
| 29               | 6                | 0              | 4.140962                | -1.057456 | -0.978800 |
| 30               | 6                | 0              | 3.940156                | 3.051935  | -1.044069 |
| 31               | 6                | 0              | 3.634236                | 3.046791  | 1.469543  |
| 32               | 6                | 0              | 3.347974                | -3.167373 | -2.150552 |
| 33               | 6                | 0              | 2.774314                | -3.143650 | 2.430923  |



|    |   |   |           |           |           |
|----|---|---|-----------|-----------|-----------|
| 34 | 1 | 0 | 0.975013  | 4.154436  | -0.145232 |
| 35 | 1 | 0 | -1.428439 | 4.532560  | -0.458279 |
| 36 | 1 | 0 | -3.040116 | 2.675296  | -0.669330 |
| 37 | 1 | 0 | -0.279513 | -2.768543 | -1.715440 |
| 38 | 1 | 0 | -2.034785 | -2.602368 | -1.903190 |
| 39 | 1 | 0 | -0.942370 | -1.379798 | -2.594930 |
| 40 | 1 | 0 | -0.634114 | -2.920579 | 0.848970  |
| 41 | 1 | 0 | -1.450333 | -1.600135 | 1.702646  |
| 42 | 1 | 0 | -2.376487 | -2.701046 | 0.651729  |
| 43 | 1 | 0 | 4.449869  | -0.786130 | 2.326153  |
| 44 | 1 | 0 | 1.625962  | -3.069345 | -0.038788 |
| 45 | 1 | 0 | 4.946517  | -0.806254 | -1.661243 |
| 46 | 1 | 0 | 3.283916  | 3.918960  | -1.170248 |
| 47 | 1 | 0 | 4.966360  | 3.413288  | -0.923524 |
| 48 | 1 | 0 | 3.889101  | 2.445840  | -1.952890 |
| 49 | 1 | 0 | 2.969403  | 3.916067  | 1.440250  |
| 50 | 1 | 0 | 3.365733  | 2.437389  | 2.337086  |
| 51 | 1 | 0 | 4.660205  | 3.405208  | 1.600735  |
| 52 | 1 | 0 | 3.487500  | -4.165677 | -1.715440 |
| 53 | 1 | 0 | 2.401350  | -3.196672 | -2.706244 |
| 54 | 1 | 0 | 4.155629  | -2.993291 | -2.867479 |
| 55 | 1 | 0 | 3.020522  | -4.145677 | 2.055767  |
| 56 | 1 | 0 | 3.375828  | -2.958365 | 3.325595  |
| 57 | 1 | 0 | 1.718528  | -3.171871 | 2.731259  |

**27g-ene**

Thermal correction to Gibbs Free Energy= 0.383944

Sum of electronic and thermal Free Energies= -1944.815639

E[SMD(chlorobenzene)/B3LYP-D3BJ/6-311+G(d,p)] = -1945.76098303

| Center<br>Number | Atomic<br>Number | Atomic<br>Type | Coordinates (Angstroms) |           |           |
|------------------|------------------|----------------|-------------------------|-----------|-----------|
|                  |                  |                | X                       | Y         | Z         |
| 1                | 6                | 0              | 1.967202                | 1.033937  | 0.211320  |
| 2                | 6                | 0              | 0.589964                | 0.736583  | 0.286517  |
| 3                | 6                | 0              | -0.439351               | 1.663192  | 0.004578  |
| 4                | 6                | 0              | 0.018005                | 2.946137  | -0.427395 |
| 5                | 6                | 0              | 1.370670                | 3.220548  | -0.511621 |
| 6                | 6                | 0              | 2.386037                | 2.284787  | -0.182606 |
| 7                | 6                | 0              | 0.372881                | -0.591980 | 0.676597  |
| 8                | 6                | 0              | -0.914040               | -1.058928 | 0.727238  |
| 9                | 6                | 0              | -1.993722               | -0.176872 | 0.416962  |
| 10               | 6                | 0              | -1.790825               | 1.180193  | 0.155890  |
| 11               | 7                | 0              | 2.671811                | -0.153930 | 0.577135  |
| 12               | 6                | 0              | 1.695699                | -1.288223 | 0.964197  |

|    |    |   |           |           |           |
|----|----|---|-----------|-----------|-----------|
| 13 | 6  | 0 | 1.827784  | -1.616693 | 2.459120  |
| 14 | 6  | 0 | 1.884334  | -2.529726 | 0.086015  |
| 15 | 16 | 0 | 4.316745  | -0.275074 | 0.596232  |
| 16 | 8  | 0 | 4.906446  | 1.008747  | 0.968674  |
| 17 | 8  | 0 | 4.697430  | -1.518417 | 1.260521  |
| 18 | 6  | 0 | 4.802456  | -0.507408 | -1.205227 |
| 19 | 9  | 0 | 4.370843  | 0.524895  | -1.933795 |
| 20 | 9  | 0 | 6.132636  | -0.576049 | -1.275735 |
| 21 | 9  | 0 | 4.277463  | -1.635414 | -1.686629 |
| 22 | 6  | 0 | -2.997826 | 2.127383  | 0.083519  |
| 23 | 8  | 0 | -4.172629 | 1.505474  | 0.702181  |
| 24 | 6  | 0 | -4.486303 | 0.239249  | 0.337655  |
| 25 | 6  | 0 | -3.380981 | -0.789071 | 0.408278  |
| 26 | 6  | 0 | -3.649550 | -1.908509 | -0.609301 |
| 27 | 6  | 0 | -5.050002 | -2.347216 | -0.625263 |
| 28 | 6  | 0 | -6.061449 | -1.509669 | -0.281294 |
| 29 | 6  | 0 | -5.757495 | -0.127247 | 0.086735  |
| 30 | 6  | 0 | -2.838141 | 3.373008  | 0.967719  |
| 31 | 6  | 0 | -3.366435 | 2.489638  | -1.361424 |
| 32 | 6  | 0 | -7.507645 | -1.918693 | -0.355995 |
| 33 | 6  | 0 | -2.726702 | -2.479224 | -1.402351 |
| 34 | 1  | 0 | -0.679252 | 3.716792  | -0.725869 |
| 35 | 1  | 0 | 1.681249  | 4.204404  | -0.851191 |
| 36 | 1  | 0 | 3.429281  | 2.559784  | -0.254499 |
| 37 | 1  | 0 | -1.138757 | -2.087415 | 0.990831  |
| 38 | 1  | 0 | 1.018824  | -2.296276 | 2.744391  |
| 39 | 1  | 0 | 2.780932  | -2.101865 | 2.675258  |
| 40 | 1  | 0 | 1.742208  | -0.709983 | 3.064210  |
| 41 | 1  | 0 | 1.098519  | -3.250592 | 0.330619  |
| 42 | 1  | 0 | 1.800952  | -2.279698 | -0.974151 |
| 43 | 1  | 0 | 2.848839  | -3.006783 | 0.269874  |
| 44 | 1  | 0 | -5.270155 | -3.336491 | -1.019599 |
| 45 | 1  | 0 | -6.554735 | 0.608642  | 0.133470  |
| 46 | 1  | 0 | -2.116307 | 4.085062  | 0.572272  |
| 47 | 1  | 0 | -3.808557 | 3.873214  | 1.030371  |
| 48 | 1  | 0 | -2.531415 | 3.088466  | 1.977904  |
| 49 | 1  | 0 | -2.535984 | 2.991239  | -1.865217 |
| 50 | 1  | 0 | -3.612584 | 1.589533  | -1.932686 |
| 51 | 1  | 0 | -4.233858 | 3.157132  | -1.370926 |
| 52 | 1  | 0 | -8.064759 | -1.267872 | -1.042070 |
| 53 | 1  | 0 | -7.618991 | -2.951362 | -0.697555 |
| 54 | 1  | 0 | -7.993770 | -1.827194 | 0.623851  |
| 55 | 1  | 0 | -3.001439 | -3.308308 | -2.049607 |
| 56 | 1  | 0 | -1.696233 | -2.147834 | -1.443140 |
| 57 | 1  | 0 | -3.520448 | -1.282408 | 1.389035  |

---

**27g'**

Thermal correction to Gibbs Free Energy= 0.383740

Sum of electronic and thermal Free Energies= -1944.876426

E[SMD(chlorobenzene)/B3LYP-D3BJ/6-311+G(d,p)] = -1945.81696758

| Center<br>Number | Atomic<br>Number | Atomic<br>Type | Coordinates (Angstroms) |           |           |
|------------------|------------------|----------------|-------------------------|-----------|-----------|
|                  |                  |                | X                       | Y         | Z         |
| 1                | 6                | 0              | -1.989664               | 1.017152  | -0.312067 |
| 2                | 6                | 0              | -0.607099               | 0.743417  | -0.248571 |
| 3                | 6                | 0              | 0.391465                | 1.721675  | -0.029456 |
| 4                | 6                | 0              | -0.114908               | 3.041857  | 0.189351  |
| 5                | 6                | 0              | -1.472680               | 3.293722  | 0.141467  |
| 6                | 6                | 0              | -2.452031               | 2.299596  | -0.124556 |
| 7                | 6                | 0              | -0.343131               | -0.616642 | -0.442324 |
| 8                | 6                | 0              | 0.949594                | -1.061697 | -0.354625 |
| 9                | 6                | 0              | 2.002294                | -0.131747 | -0.084379 |
| 10               | 6                | 0              | 1.749271                | 1.253618  | -0.020366 |
| 11               | 7                | 0              | -2.649205               | -0.225587 | -0.563992 |
| 12               | 6                | 0              | -1.631475               | -1.377220 | -0.725996 |
| 13               | 6                | 0              | -1.651560               | -1.906868 | -2.167576 |
| 14               | 6                | 0              | -1.864182               | -2.493237 | 0.298335  |
| 15               | 16               | 0              | -4.285883               | -0.387669 | -0.679804 |
| 16               | 8                | 0              | -4.866856               | 0.821855  | -1.258098 |
| 17               | 8                | 0              | -4.600457               | -1.715958 | -1.198539 |
| 18               | 6                | 0              | -4.894519               | -0.391003 | 1.099085  |
| 19               | 9                | 0              | -4.507138               | 0.727431  | 1.717256  |
| 20               | 9                | 0              | -6.226773               | -0.454195 | 1.087494  |
| 21               | 9                | 0              | -4.409940               | -1.446076 | 1.756014  |
| 22               | 6                | 0              | 2.964603                | 2.190286  | 0.072795  |
| 23               | 8                | 0              | 4.082000                | 1.565320  | -0.634482 |
| 24               | 6                | 0              | 4.407567                | 0.289744  | -0.290033 |
| 25               | 6                | 0              | 3.392847                | -0.622643 | 0.061135  |
| 26               | 6                | 0              | 3.796997                | -1.906633 | 0.511591  |
| 27               | 6                | 0              | 5.157936                | -2.238785 | 0.473812  |
| 28               | 6                | 0              | 6.144925                | -1.355214 | 0.021252  |
| 29               | 6                | 0              | 5.753257                | -0.064968 | -0.341762 |
| 30               | 6                | 0              | 2.842104                | 3.515304  | -0.695513 |
| 31               | 6                | 0              | 3.369200                | 2.445975  | 1.532795  |
| 32               | 6                | 0              | 7.592184                | -1.774505 | -0.052663 |
| 33               | 6                | 0              | 2.856068                | -2.940629 | 1.095680  |
| 34               | 1                | 0              | 0.548508                | 3.861260  | 0.421442  |
| 35               | 1                | 0              | -1.818750               | 4.308049  | 0.318370  |
| 36               | 1                | 0              | -3.500999               | 2.559213  | -0.164767 |
| 37               | 1                | 0              | 1.187293                | -2.103458 | -0.517237 |
| 38               | 1                | 0              | -0.813114               | -2.597175 | -2.302356 |

|    |   |   |           |           |           |
|----|---|---|-----------|-----------|-----------|
| 39 | 1 | 0 | -2.578902 | -2.441169 | -2.380195 |
| 40 | 1 | 0 | -1.538250 | -1.087727 | -2.882896 |
| 41 | 1 | 0 | -1.049119 | -3.218219 | 0.212461  |
| 42 | 1 | 0 | -1.864761 | -2.099135 | 1.317182  |
| 43 | 1 | 0 | -2.803369 | -3.018132 | 0.113119  |
| 44 | 1 | 0 | 5.457469  | -3.223370 | 0.824889  |
| 45 | 1 | 0 | 6.479009  | 0.682951  | -0.646698 |
| 46 | 1 | 0 | 2.322078  | 4.283909  | -0.124925 |
| 47 | 1 | 0 | 3.855958  | 3.878454  | -0.883300 |
| 48 | 1 | 0 | 2.341064  | 3.382366  | -1.657600 |
| 49 | 1 | 0 | 2.553123  | 2.943841  | 2.065047  |
| 50 | 1 | 0 | 3.591895  | 1.511389  | 2.054711  |
| 51 | 1 | 0 | 4.254844  | 3.088641  | 1.573244  |
| 52 | 1 | 0 | 8.262966  | -0.948495 | 0.204158  |
| 53 | 1 | 0 | 7.802253  | -2.609599 | 0.622030  |
| 54 | 1 | 0 | 7.855200  | -2.099301 | -1.067661 |
| 55 | 1 | 0 | 3.402548  | -3.578125 | 1.796720  |
| 56 | 1 | 0 | 2.020873  | -2.487876 | 1.635708  |
| 57 | 1 | 0 | 2.433537  | -3.603986 | 0.330966  |

---

## IV. References for Supporting Information

---

- <sup>1</sup> Hoye, T. R.; Hanson, P. R.; Vyvyan, J. R. A Practical Guide to First-order Multiplet Analysis in <sup>1</sup>H NMR Spectroscopy. *J. Org. Chem.* **1994**, *59*, 4096–4103.
- <sup>2</sup> Hoye, T. R.; Zhao, H. A Method for Easily Determining Coupling Constant (*J*) Values: An Addendum to "A Practical Guide to First-order Multiplet Analysis in <sup>1</sup>H NMR Spectroscopy." *J. Org. Chem.* **2002**, *67*, 4014–4016.
- <sup>3</sup> Gokel, G. W.; Cram, D. J.; Liotta, C. L.; Harris, H. P.; Cook, F. L. 18-Crown-6. *Org. Syn.* **1977**, *57*, 30–30.
- <sup>4</sup> Xiao, X.; Hoye, T. R. The Domino Hexadehydro-Diels–Alder Reaction Transforms Polyynes to Benzynes to Naphthynes to Anthracynes to Tetracynes (and Beyond?). *Nat. Chem.* **2018**, *10*, 838–844.
- <sup>5</sup> Kim, S.; Chung, Y. K. Rhodium-Catalyzed Carbonylative [3 + 2 + 1] Cycloaddition of Alkyne-Tethered Alkylidenecyclopropanes to Phenols in the Presence of Carbon Monoxide. *Org. Lett.* **2014**, *16*, 4352–4355.
- <sup>6</sup> Rentsch, A.; Kalesse, M. The Total Synthesis of Coralopyronin A and Myxopyronin B. *Angew. Chem. Int. Ed.* **2012**, *51*, 11381–11384.
- <sup>7</sup> Xu, H.; He, J.; Shi, J.; Tan, L.; Qiu, D.; Luo, X.; Li, Y. Domino Aryne Annulation via a Nucleophilic-Ene Process. *J. Am. Chem. Soc.* **2018**, *140*, 3555–3559.
- <sup>8</sup> Shi, J.; Qiu, D.; Wang, J.; Xu, H.; Li, Y. Domino Aryne Precursor: Efficient Construction of 2,4-Disubstituted Benzothiazoles. *J. Am. Chem. Soc.* **2015**, *137*, 5670–5673.
- <sup>9</sup> Dunetz, J. R.; Danheiser, R. L. Copper-Mediated N-Alkynylation of Carbamates, Ureas, and Sulfonamides. A General Method for the Synthesis of Ynamides. *Org. Lett.* **2003**, *5*, 4011–4014.
- <sup>10</sup> Morán-Poladura, P.; Rubio, E.; González, J. M. Intramolecular C–H Activation through Gold(I)-Catalyzed Reaction of Iodoalkynes. *Angew. Chem. Int. Ed.* **2015**, *54*, 3052–3055.
- <sup>11</sup> Chen, X.; Merrett, J. T.; Hong Chan, P. W. Gold-Catalyzed Formal [4+2] Cycloaddition of 5-(Ethynylamino)pent-2-yn-1-yl Esters to 1,2,3,5-Tetrahydrobenzo[g]quinolines. *Org. Lett.* **2018**, *20*, 1542–1545.
- <sup>12</sup> Nicolai, S.; Sedigh-Zadeh, R.; Waser, J. Pd(0)-Catalyzed Alkene Oxy- and Aminoalkynylation with Aliphatic Bromoacetylenes. *J. Org. Chem.* **2013**, *78*, 3783–3801.
- <sup>13</sup> Niu, D.; Hoye, T. R. The Aromatic Ene Reaction. *Nat. Chem.* **2014**, *6*, 34–40.
- <sup>14</sup> Hou, S.; Liu, Y.; Kong, Y.; Brown, M. L. Total Synthesis of 7-Hydroxymurrayazolinine, Murrayamine D, and Mahanine via m-Nitro Group Activated Pyran Annulation. *Org. Lett.* **2015**, *17*, 2298–2301.

- 
- <sup>15</sup> Zheng, S. C.; Wang, Q.; Zhu, J. Catalytic Atropenantioselective Heteroannulation between Isocyanacetates and Alkynyl Ketones: Synthesis of Enantioenriched Axially Chiral 3-Arylpyrroles. *Angew. Chem. Int. Ed.* **2019**, *58*, 1494–1498.
- <sup>16</sup> Frisch, M. J.; Trucks, G. W.; Schlegel, H. B.; Scuseria, G. E.; Robb, M. A.; Cheeseman, J. R.; Scalmani, G.; Barone, V.; Mennucci, B.; Petersson, G. A.; Nakatsuji, H.; Caricato, M.; Li, X.; Hratchian, H. P.; Izmaylov, A. F.; Bloino, J.; Zheng, G.; Sonnenberg, J. L.; Hada, M.; Ehara, M.; Toyota, K.; Fukuda, R.; Hasegawa, J.; Ishida, M.; Nakajima, T.; Honda, Y.; Kitao, O.; Nakai, H.; Vreven, T.; Montgomery, J. A.; Peralta, Jr., J. E.; Ogliaro, F.; Bearpark, M.; Heyd, J. J.; Brothers, E.; Kudin, K. N.; Staroverov, V. N.; Keith, T.; Kobayashi, R.; Normand, J.; Raghavachari, K.; Rendell, A.; Burant, J. C.; Iyengar, S. S.; Tomasi, J.; Cossi, M.; Rega, N.; Millam, J. M.; Klene, M.; Knox, J. E.; Cross, J. B.; Bakken, V.; Adamo, C.; Jaramillo, J.; Gomperts, R.; Stratmann, R. E.; Yazyev, O.; Austin, A. J.; Cammi, R.; Pomelli, C.; Ochterski, J. W.; Martin, R. L.; Morokuma, K.; Zakrzewski, V. G.; Voth, G. A.; Salvador, P.; Dannenberg, J. J.; Dapprich, S.; Daniels, A. D.; Farkas, O.; Foresman, J. B.; Ortiz, J. V.; Cioslowski, J.; Fox, D. J. *Gaussian 09*, Revision C.01, Gaussian Inc.: Wallingford, CT (2010).
- <sup>17</sup> CYLview, 1.0b; C. Y. Legault, Université de Sherbrooke, **2009** (<http://www.cylview.org>)

## V. Copies of <sup>1</sup>H, and <sup>13</sup>C NMR spectra

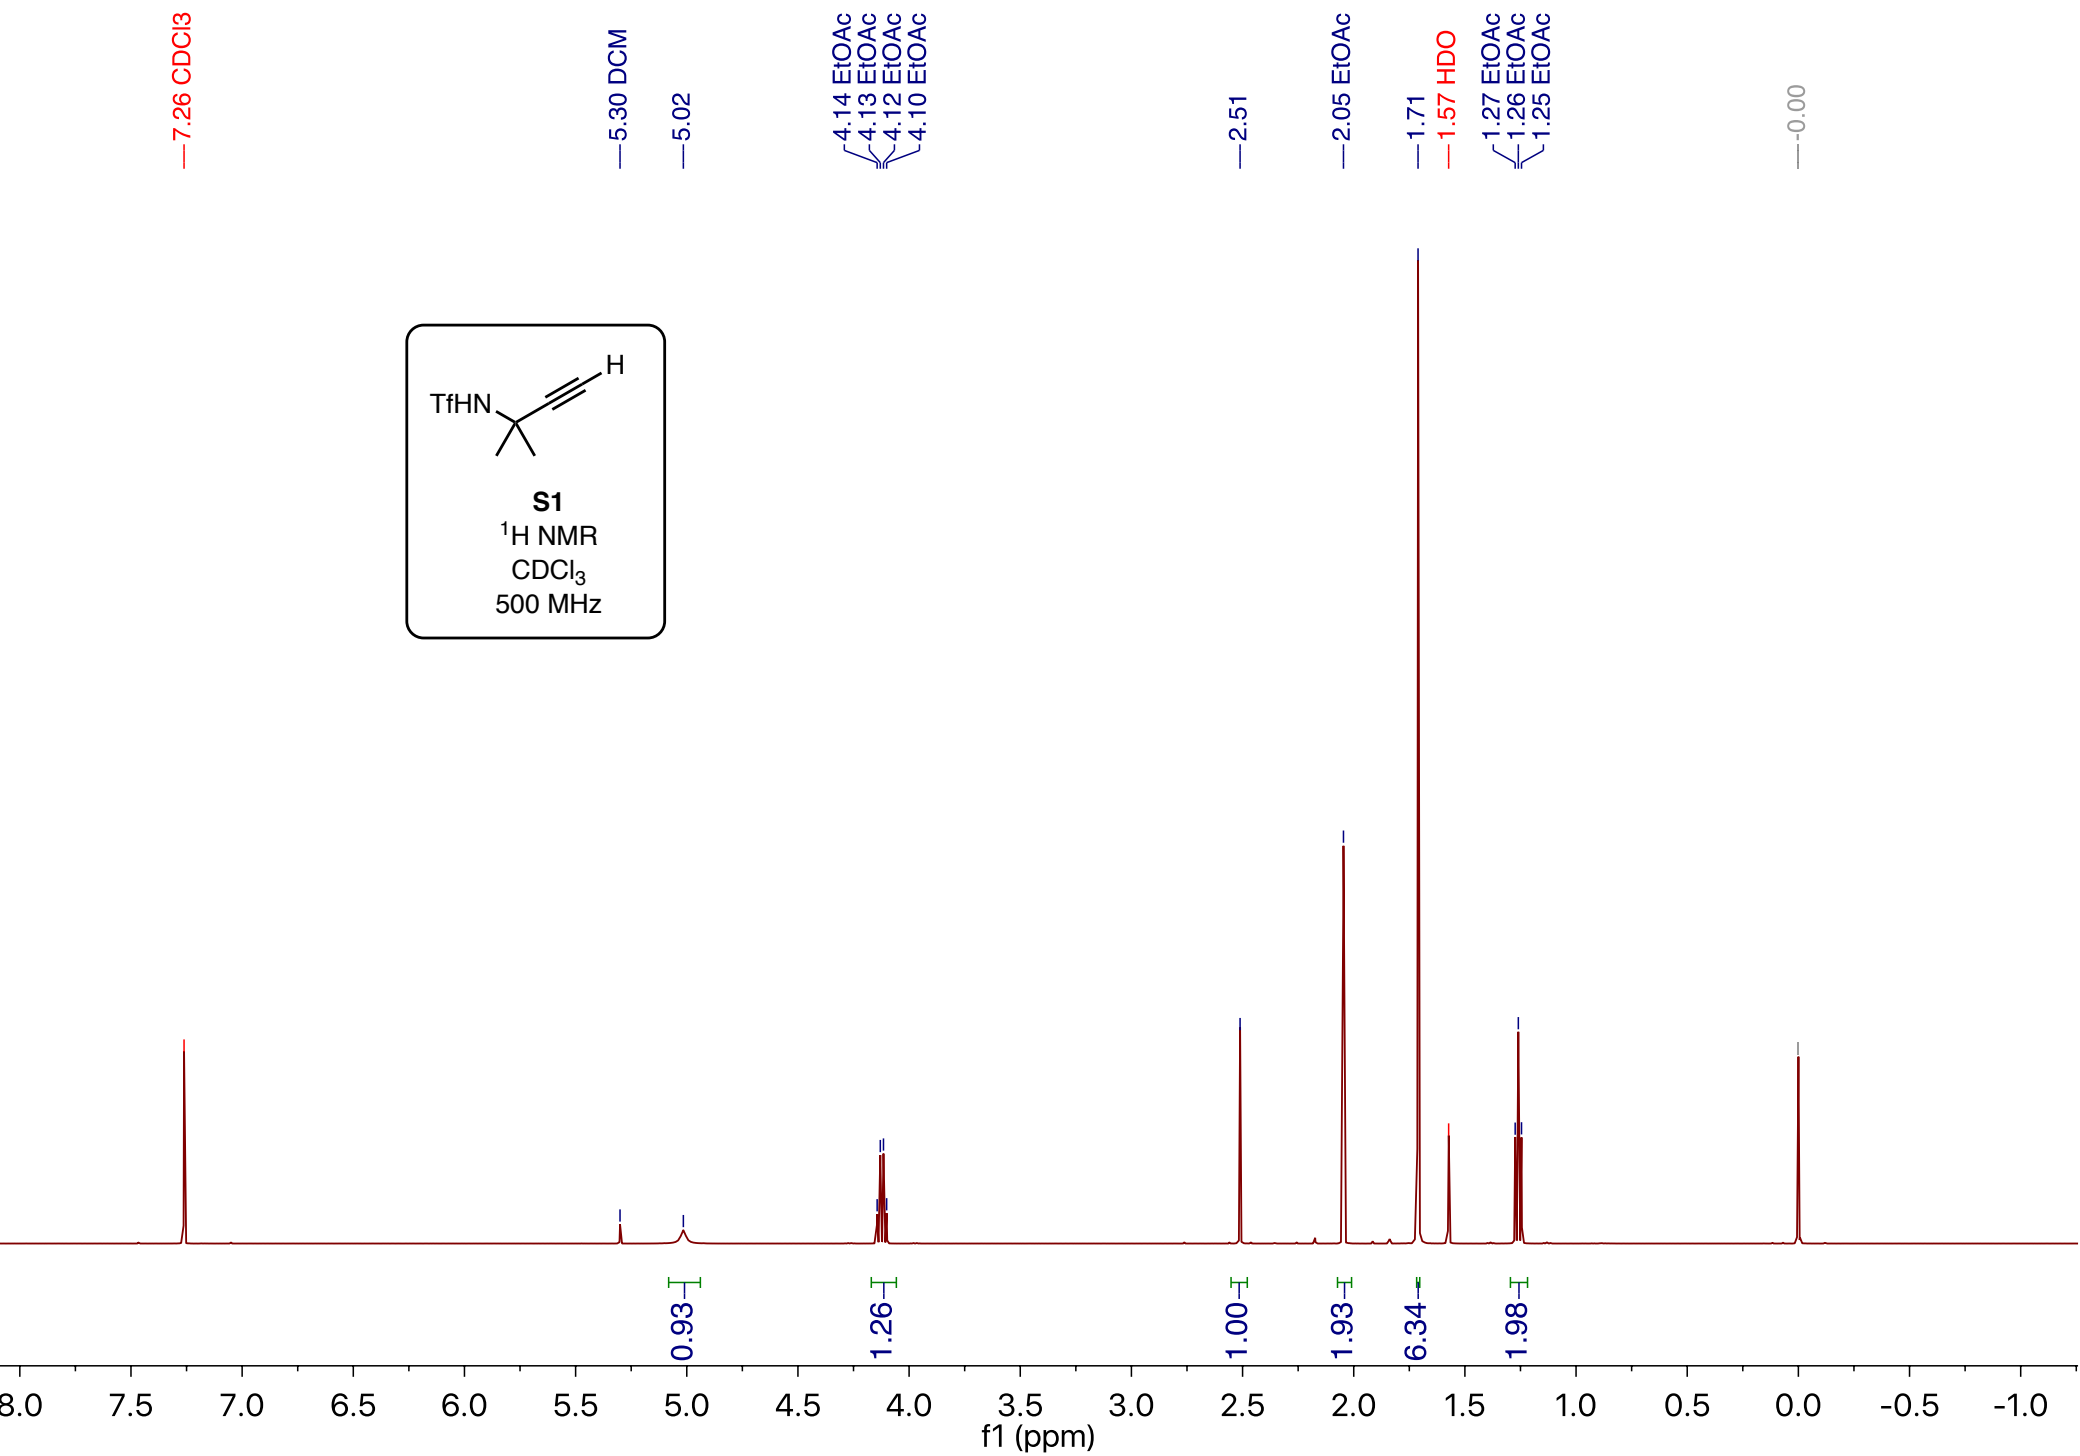

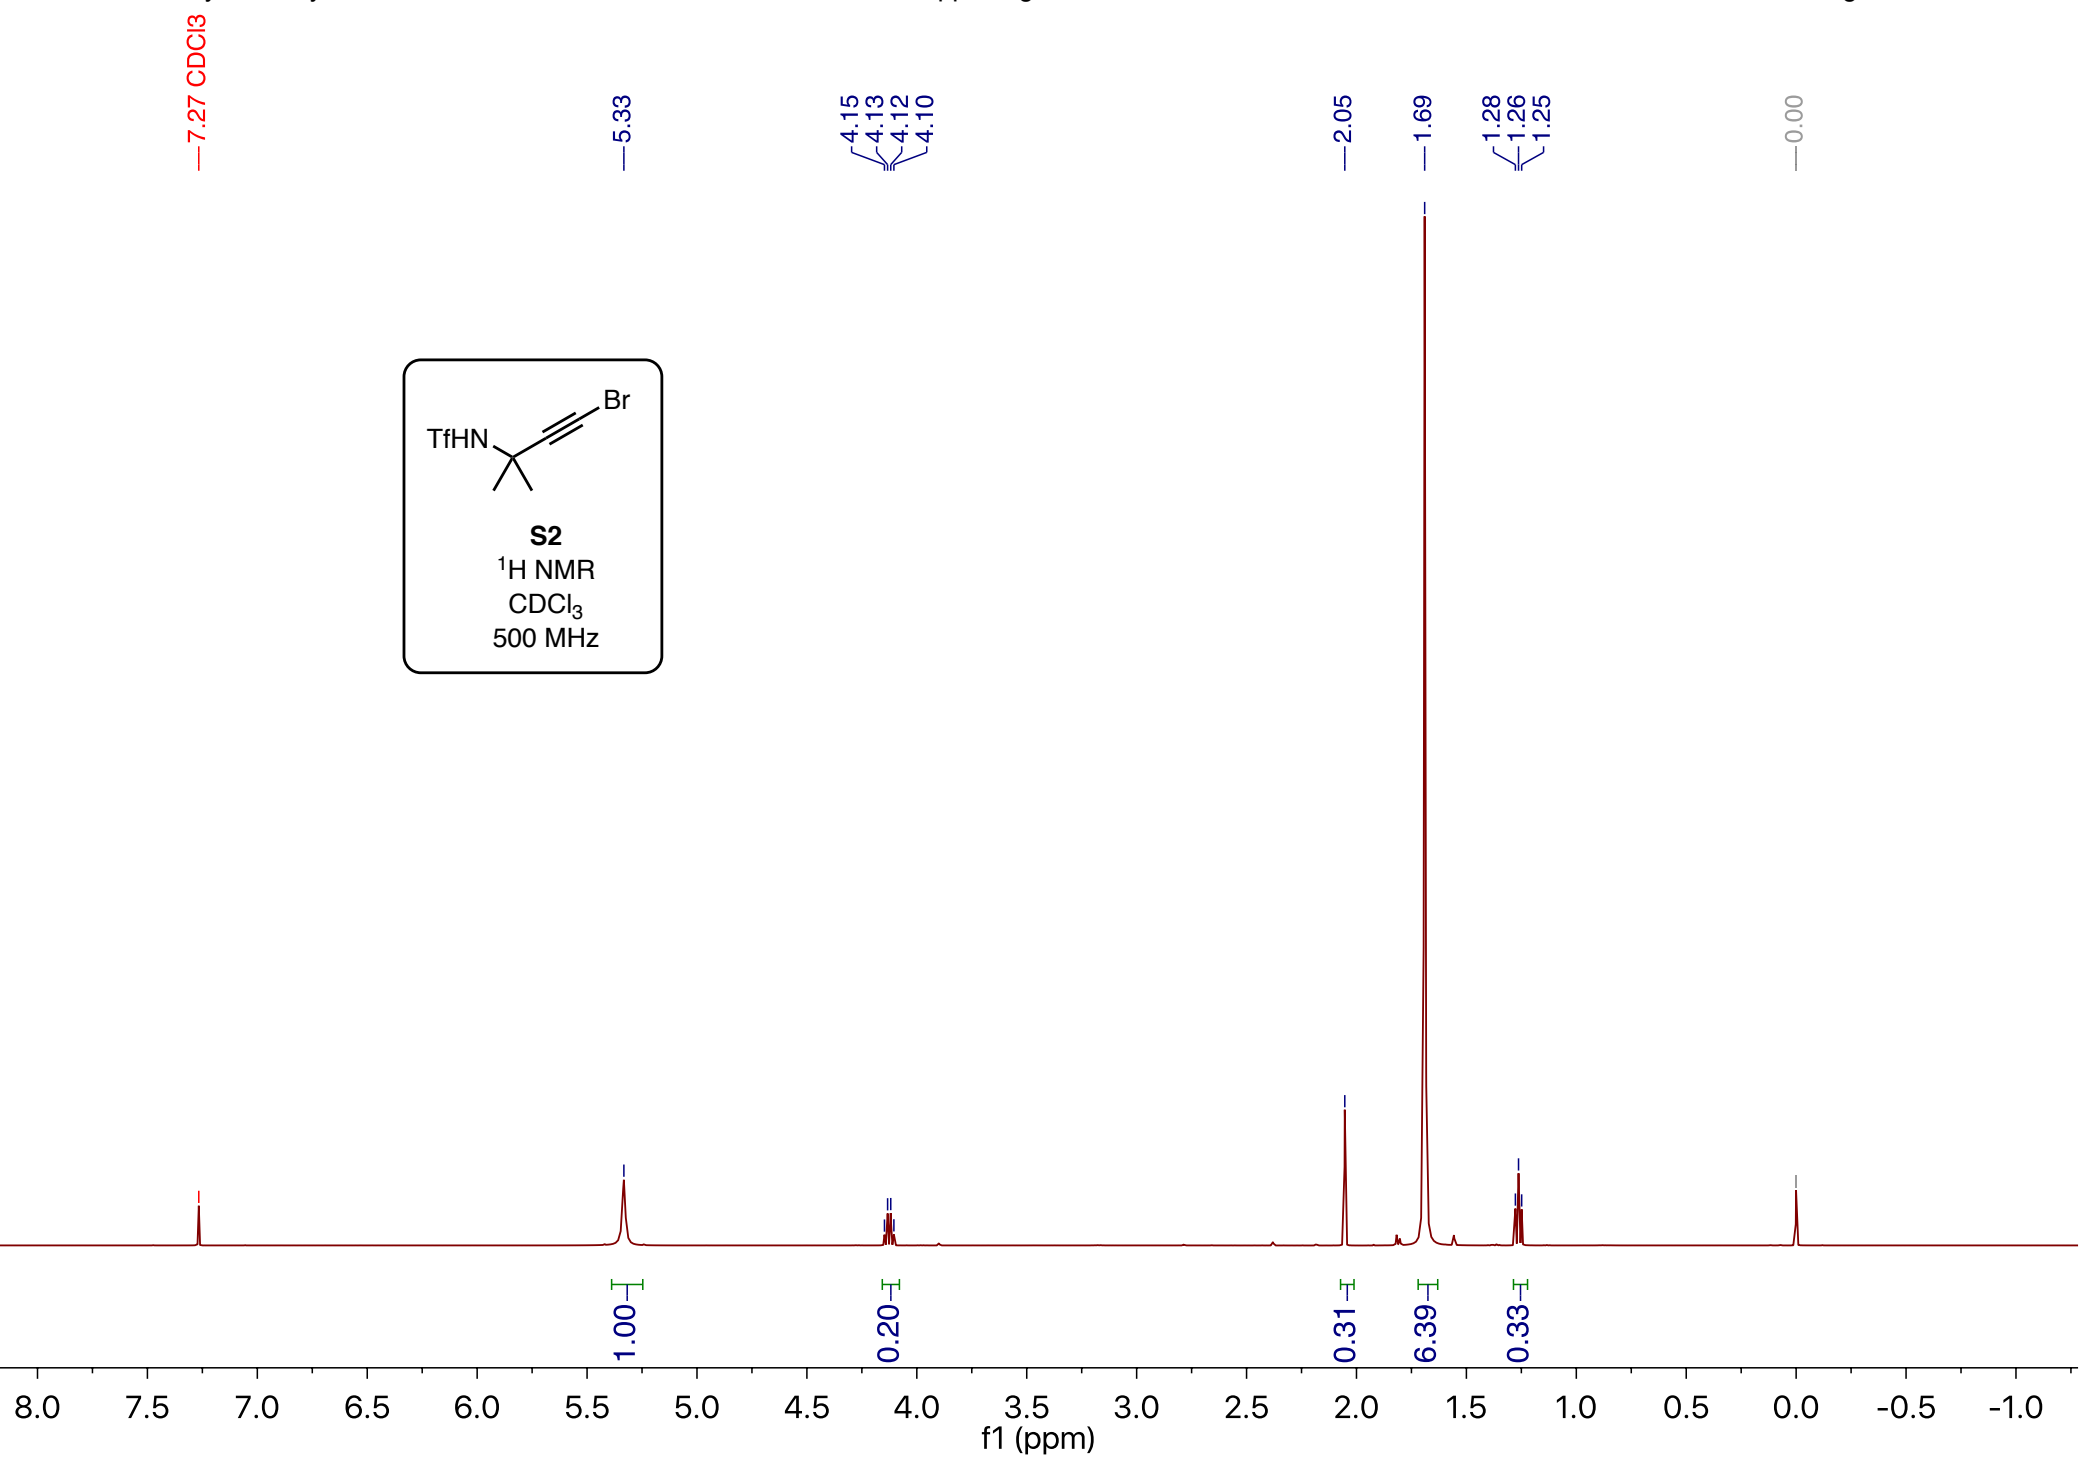



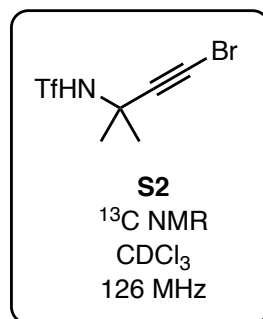

—171.9 EtOAc

—123.1  
—120.5  
—118.0  
—115.4—80.7  
—77.4  $\text{CDCl}_3$   
—77.2  $\text{CDCl}_3$   
—76.9  $\text{CDCl}_3$ 

—60.8 EtOAc

—54.0

—45.4

—30.7

—21.2 EtOAc

—14.3 EtOAc

—0.1

210 200 190 180 170 160 150 140 130 120 110 100 90 80 70 60 50 40 30 20 10 0 -10

f1 (ppm)

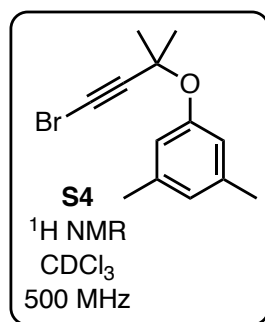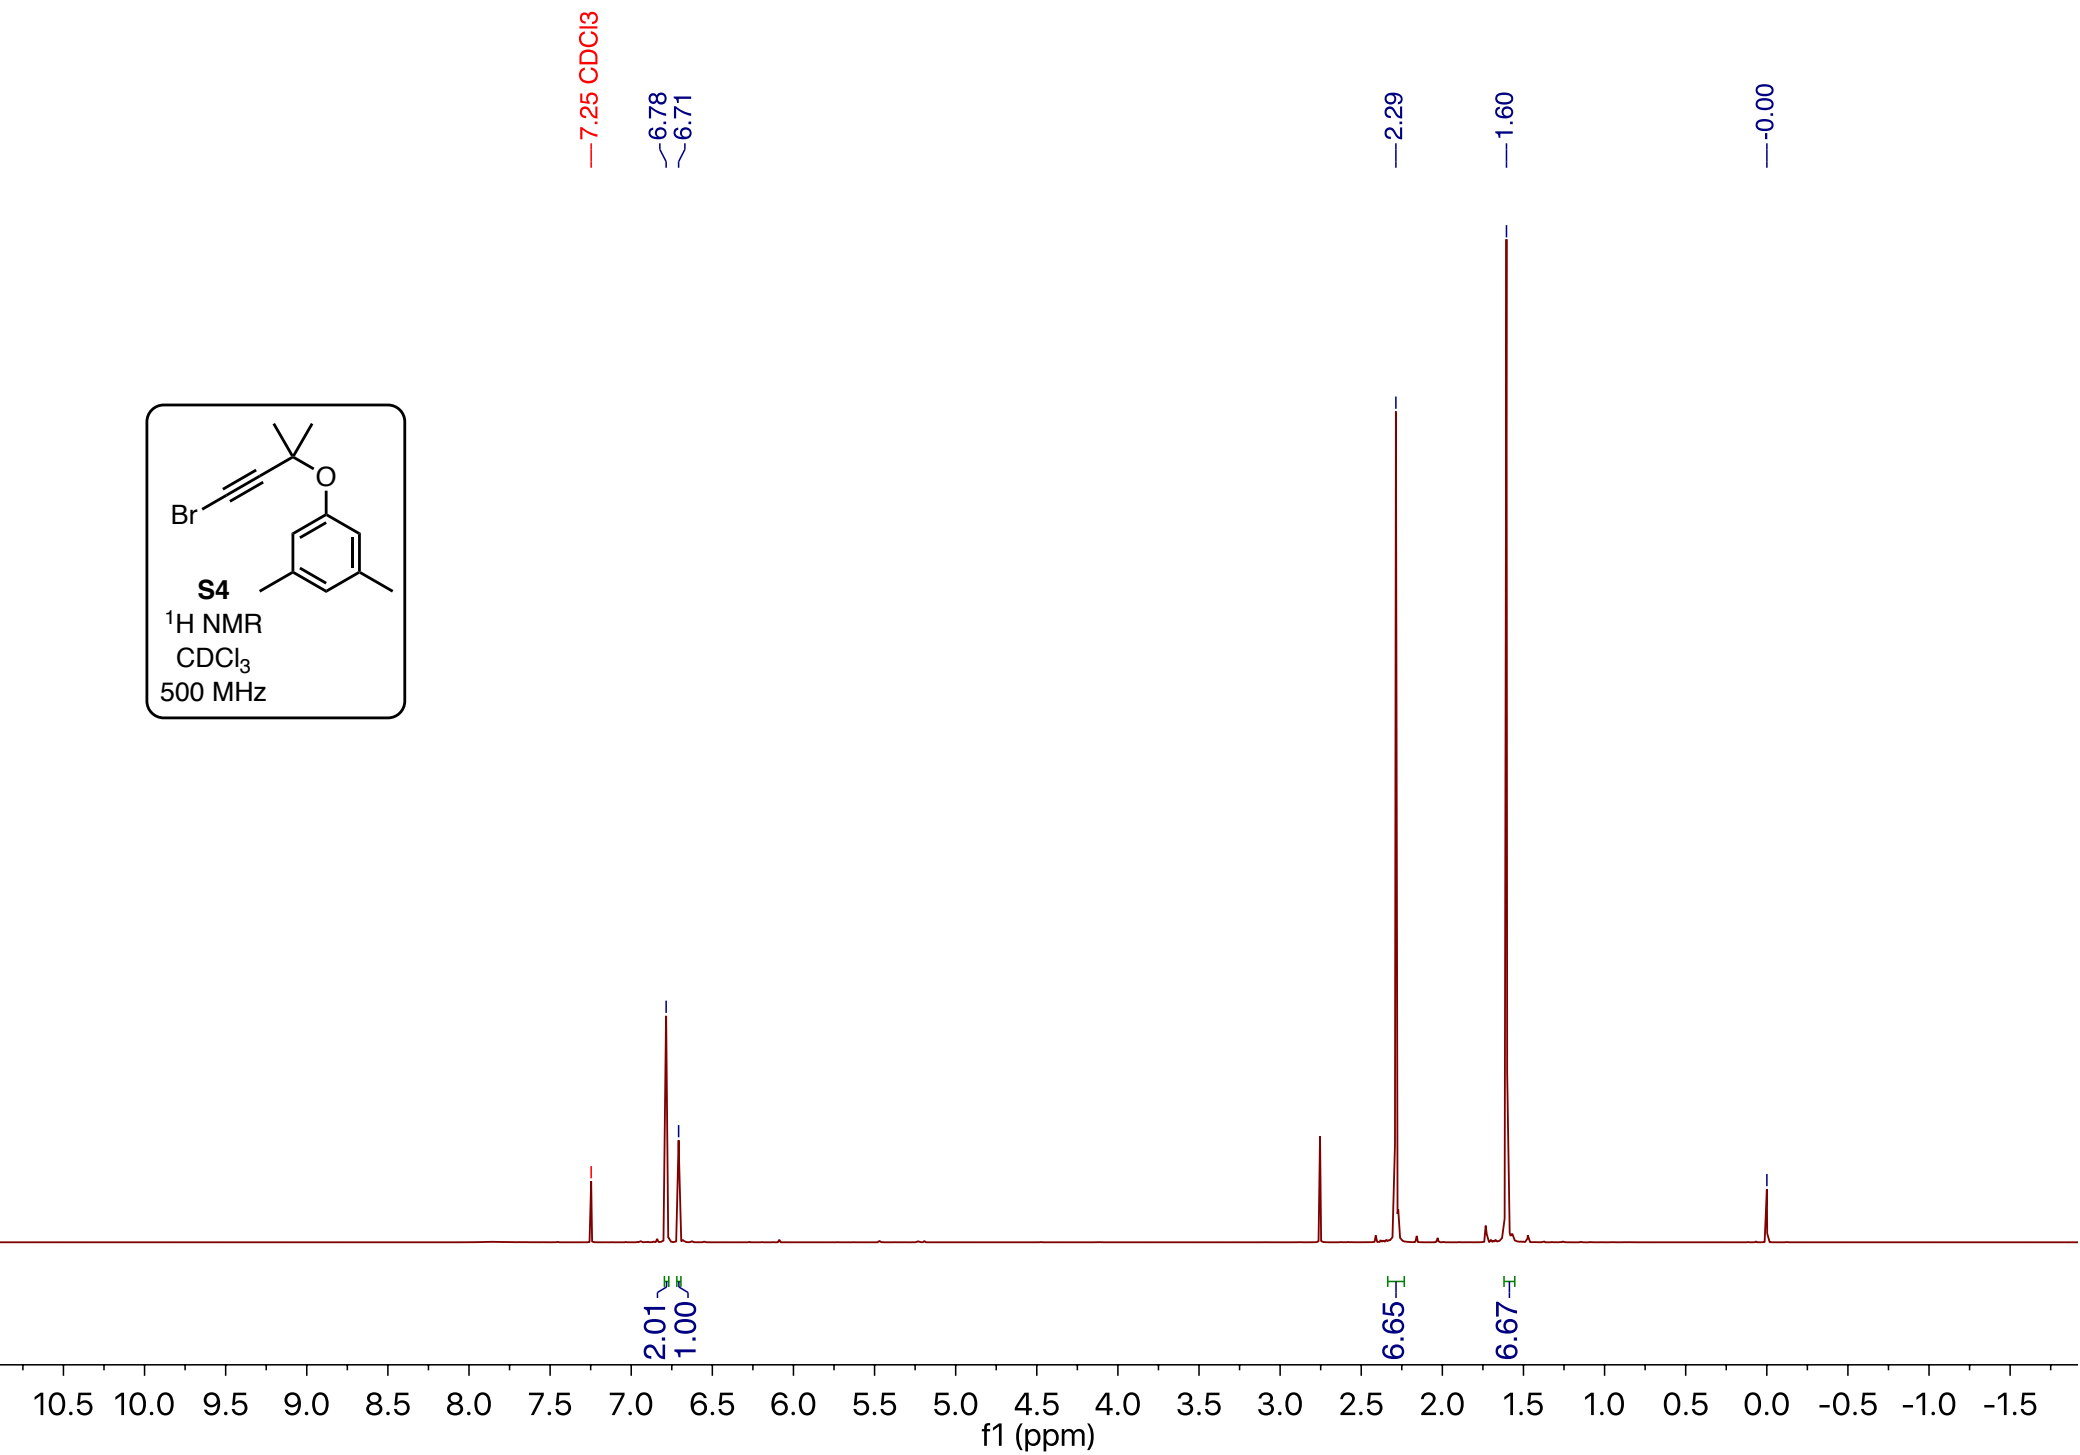

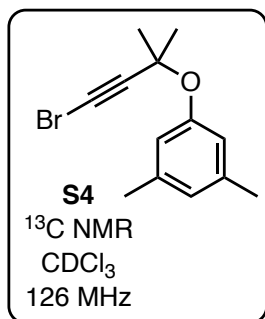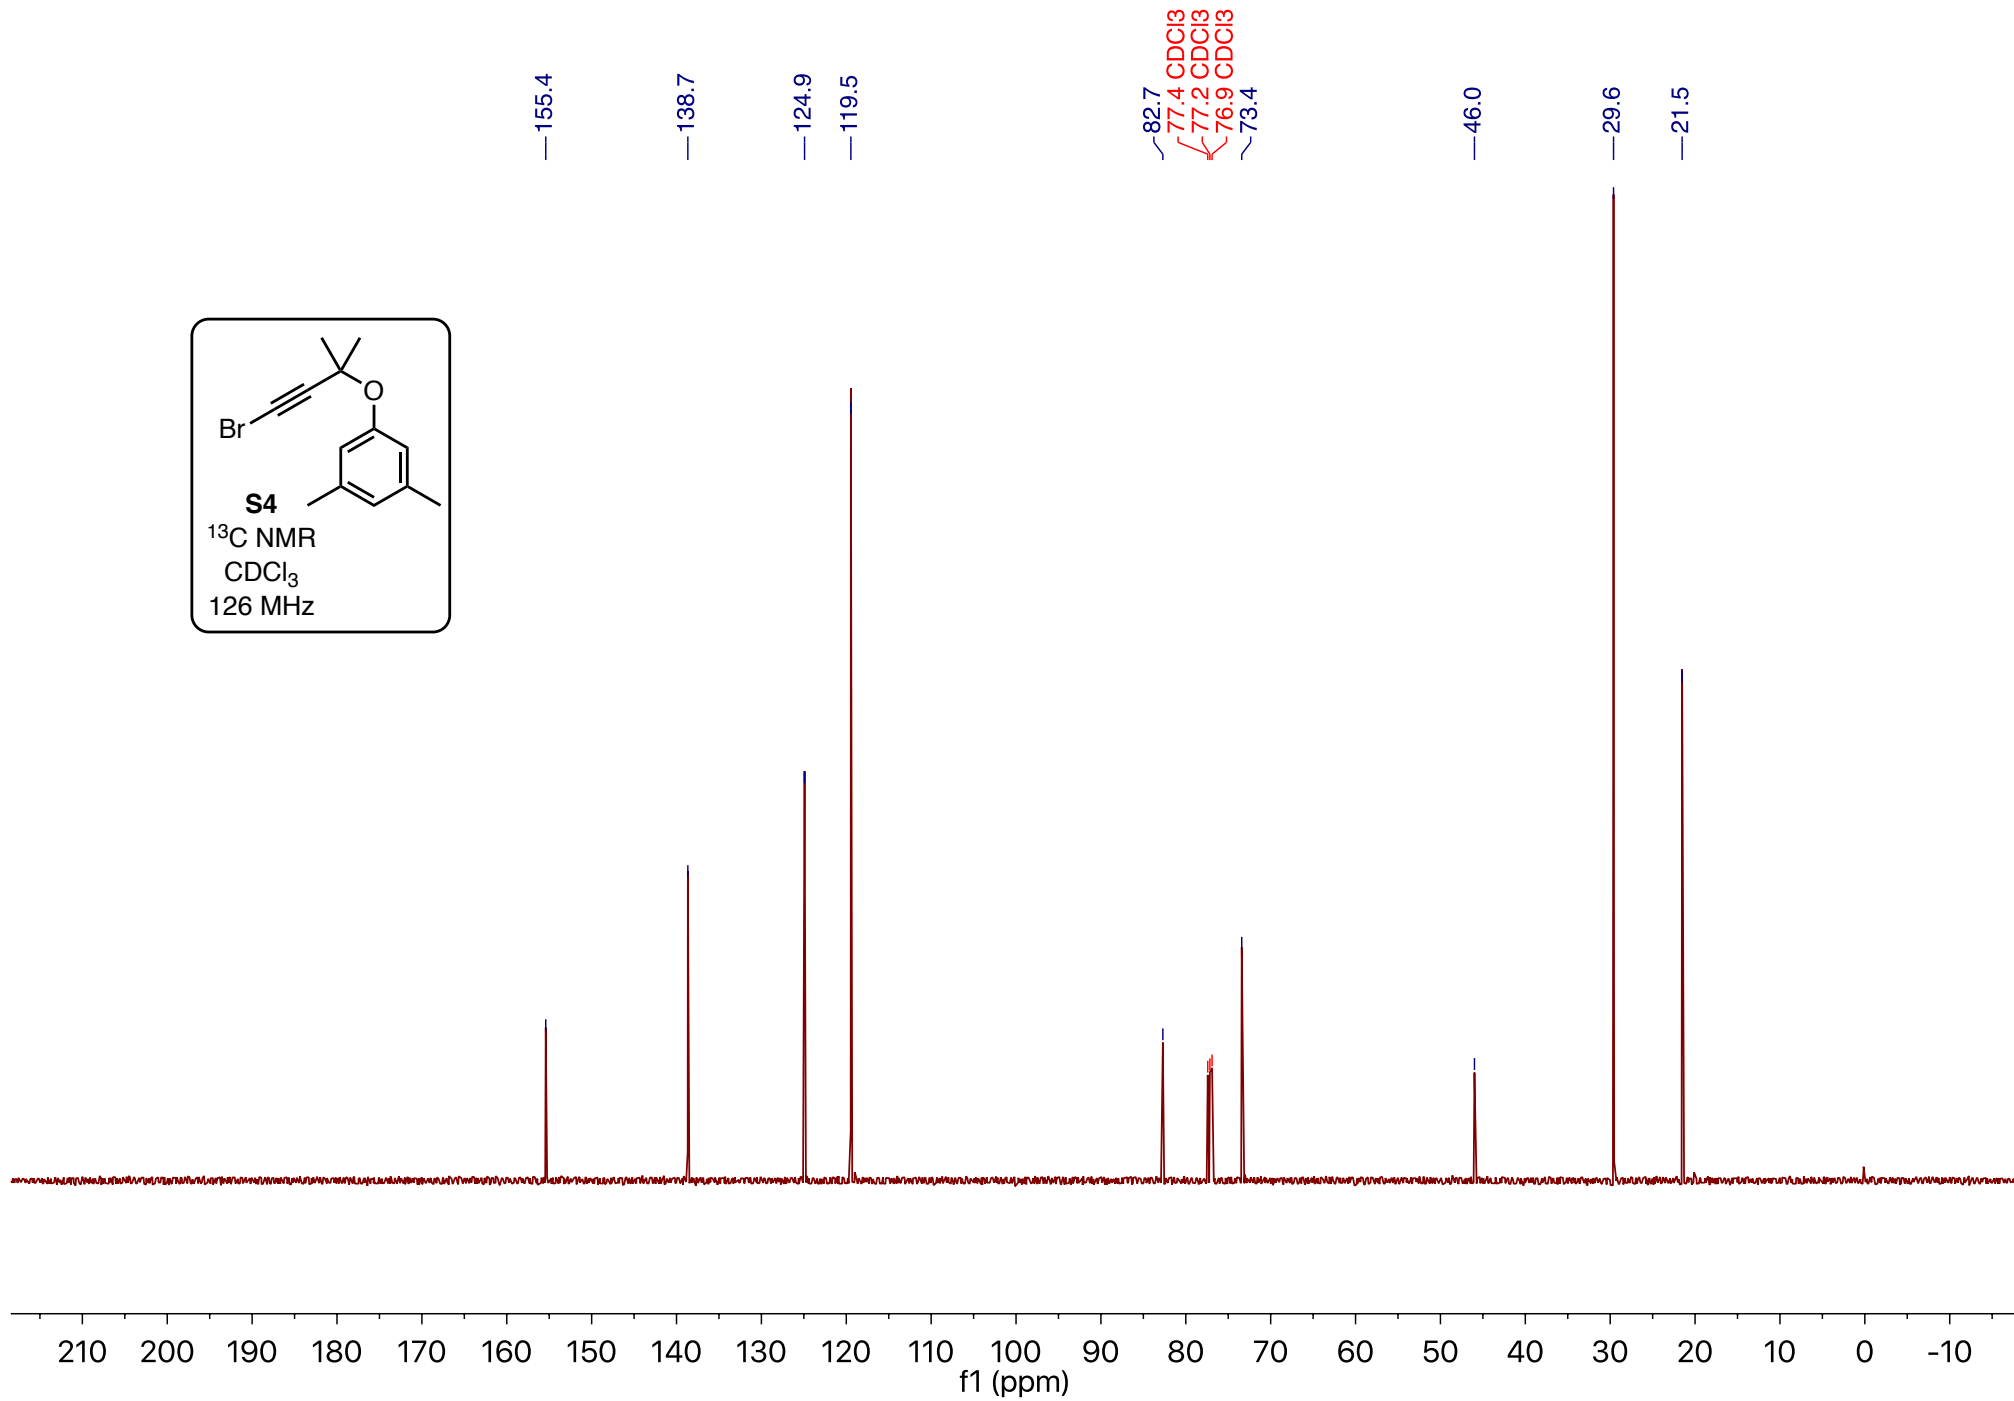



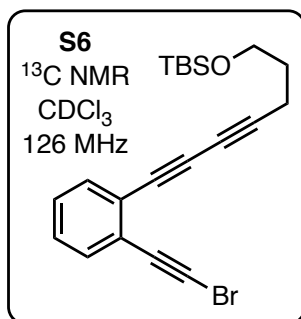

133.2  
132.7  
128.6  
128.4  
126.3  
125.3

83.2  
78.5  
78.2  
77.4 CDCI3  
77.2 CDCI3  
76.9 CDCI3  
73.1  
66.4  
61.5  
54.5

26.0  
24.3  
18.5

0.2  
-5.1

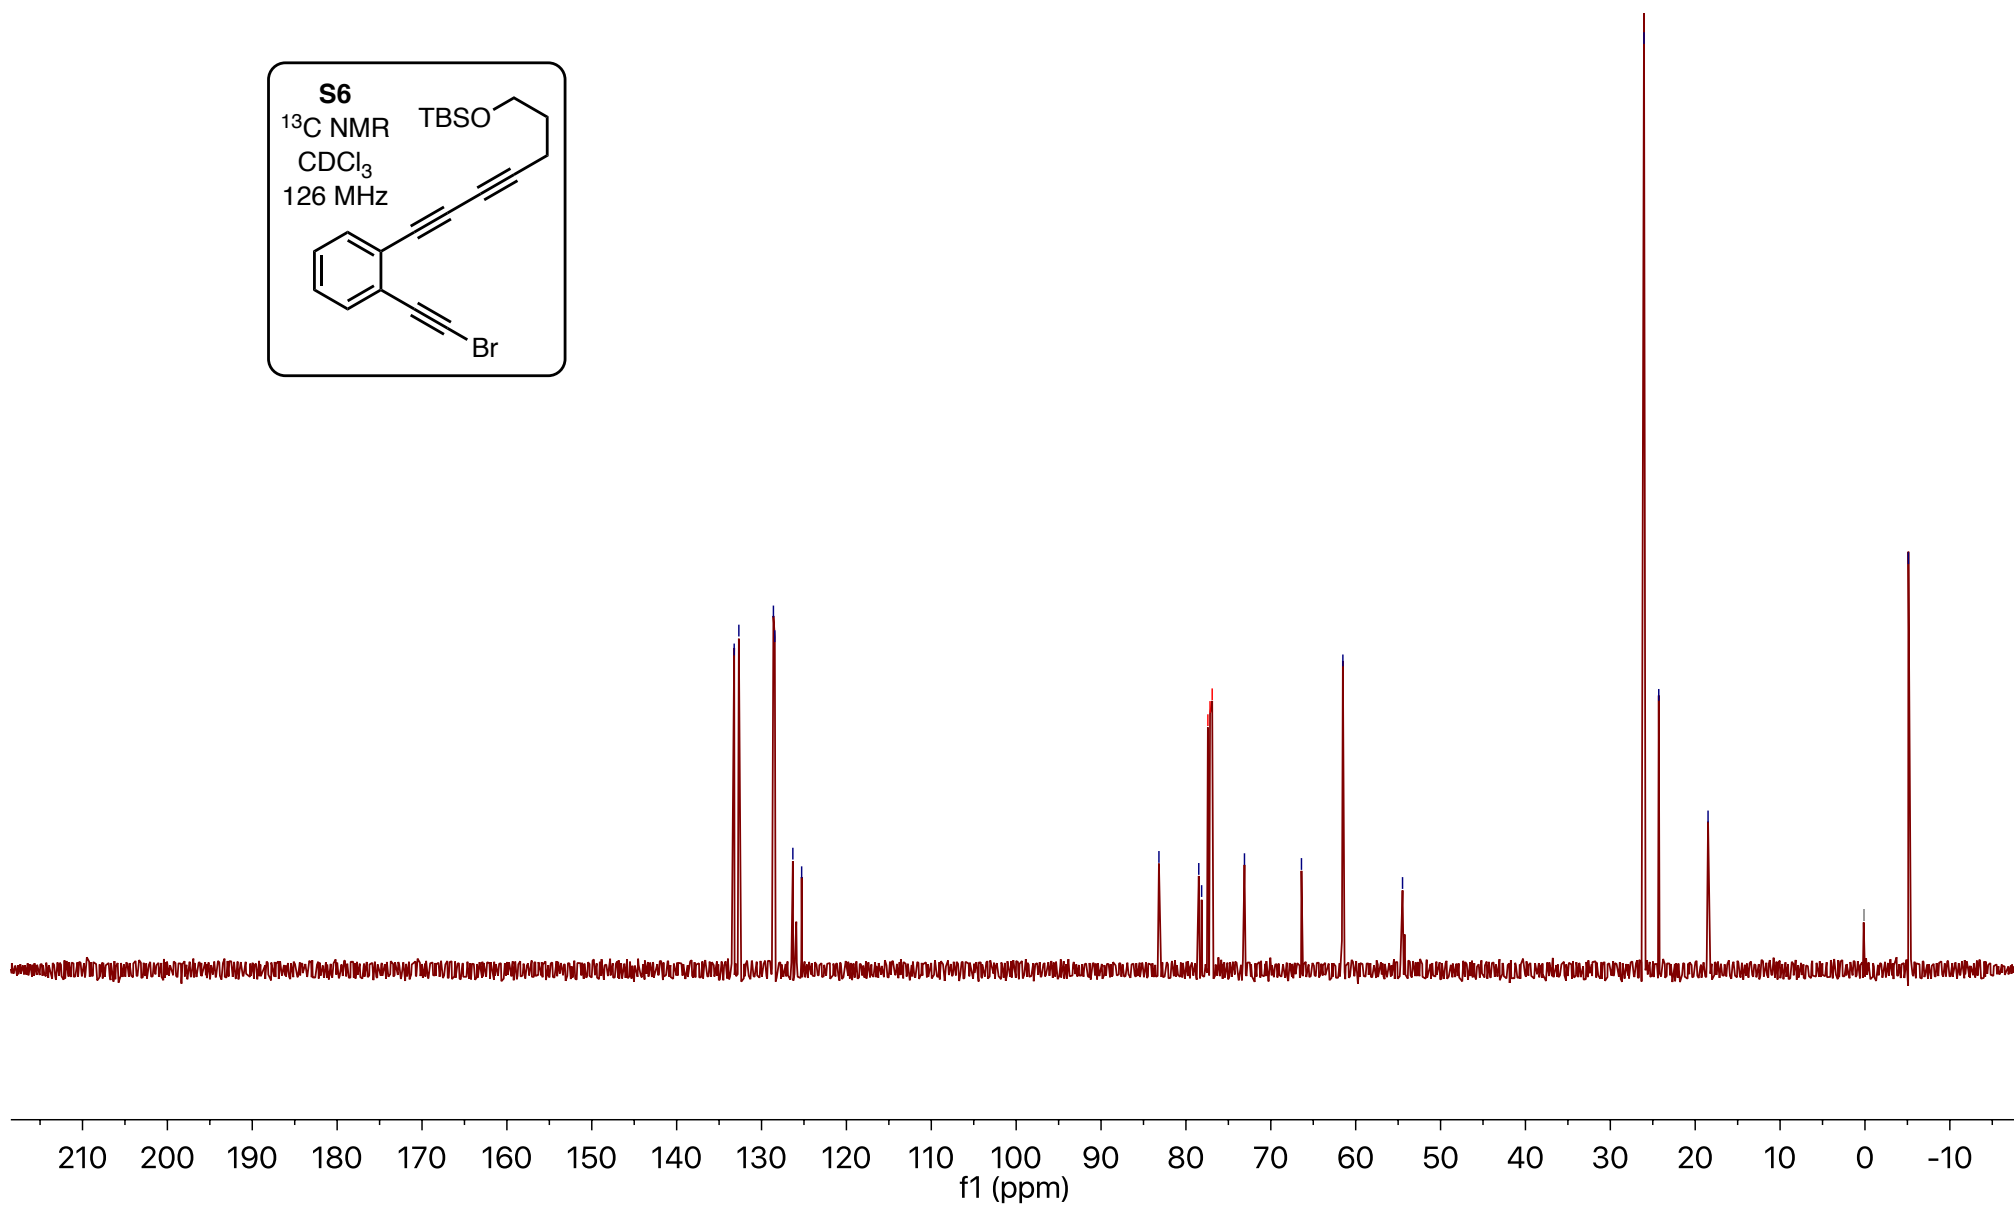

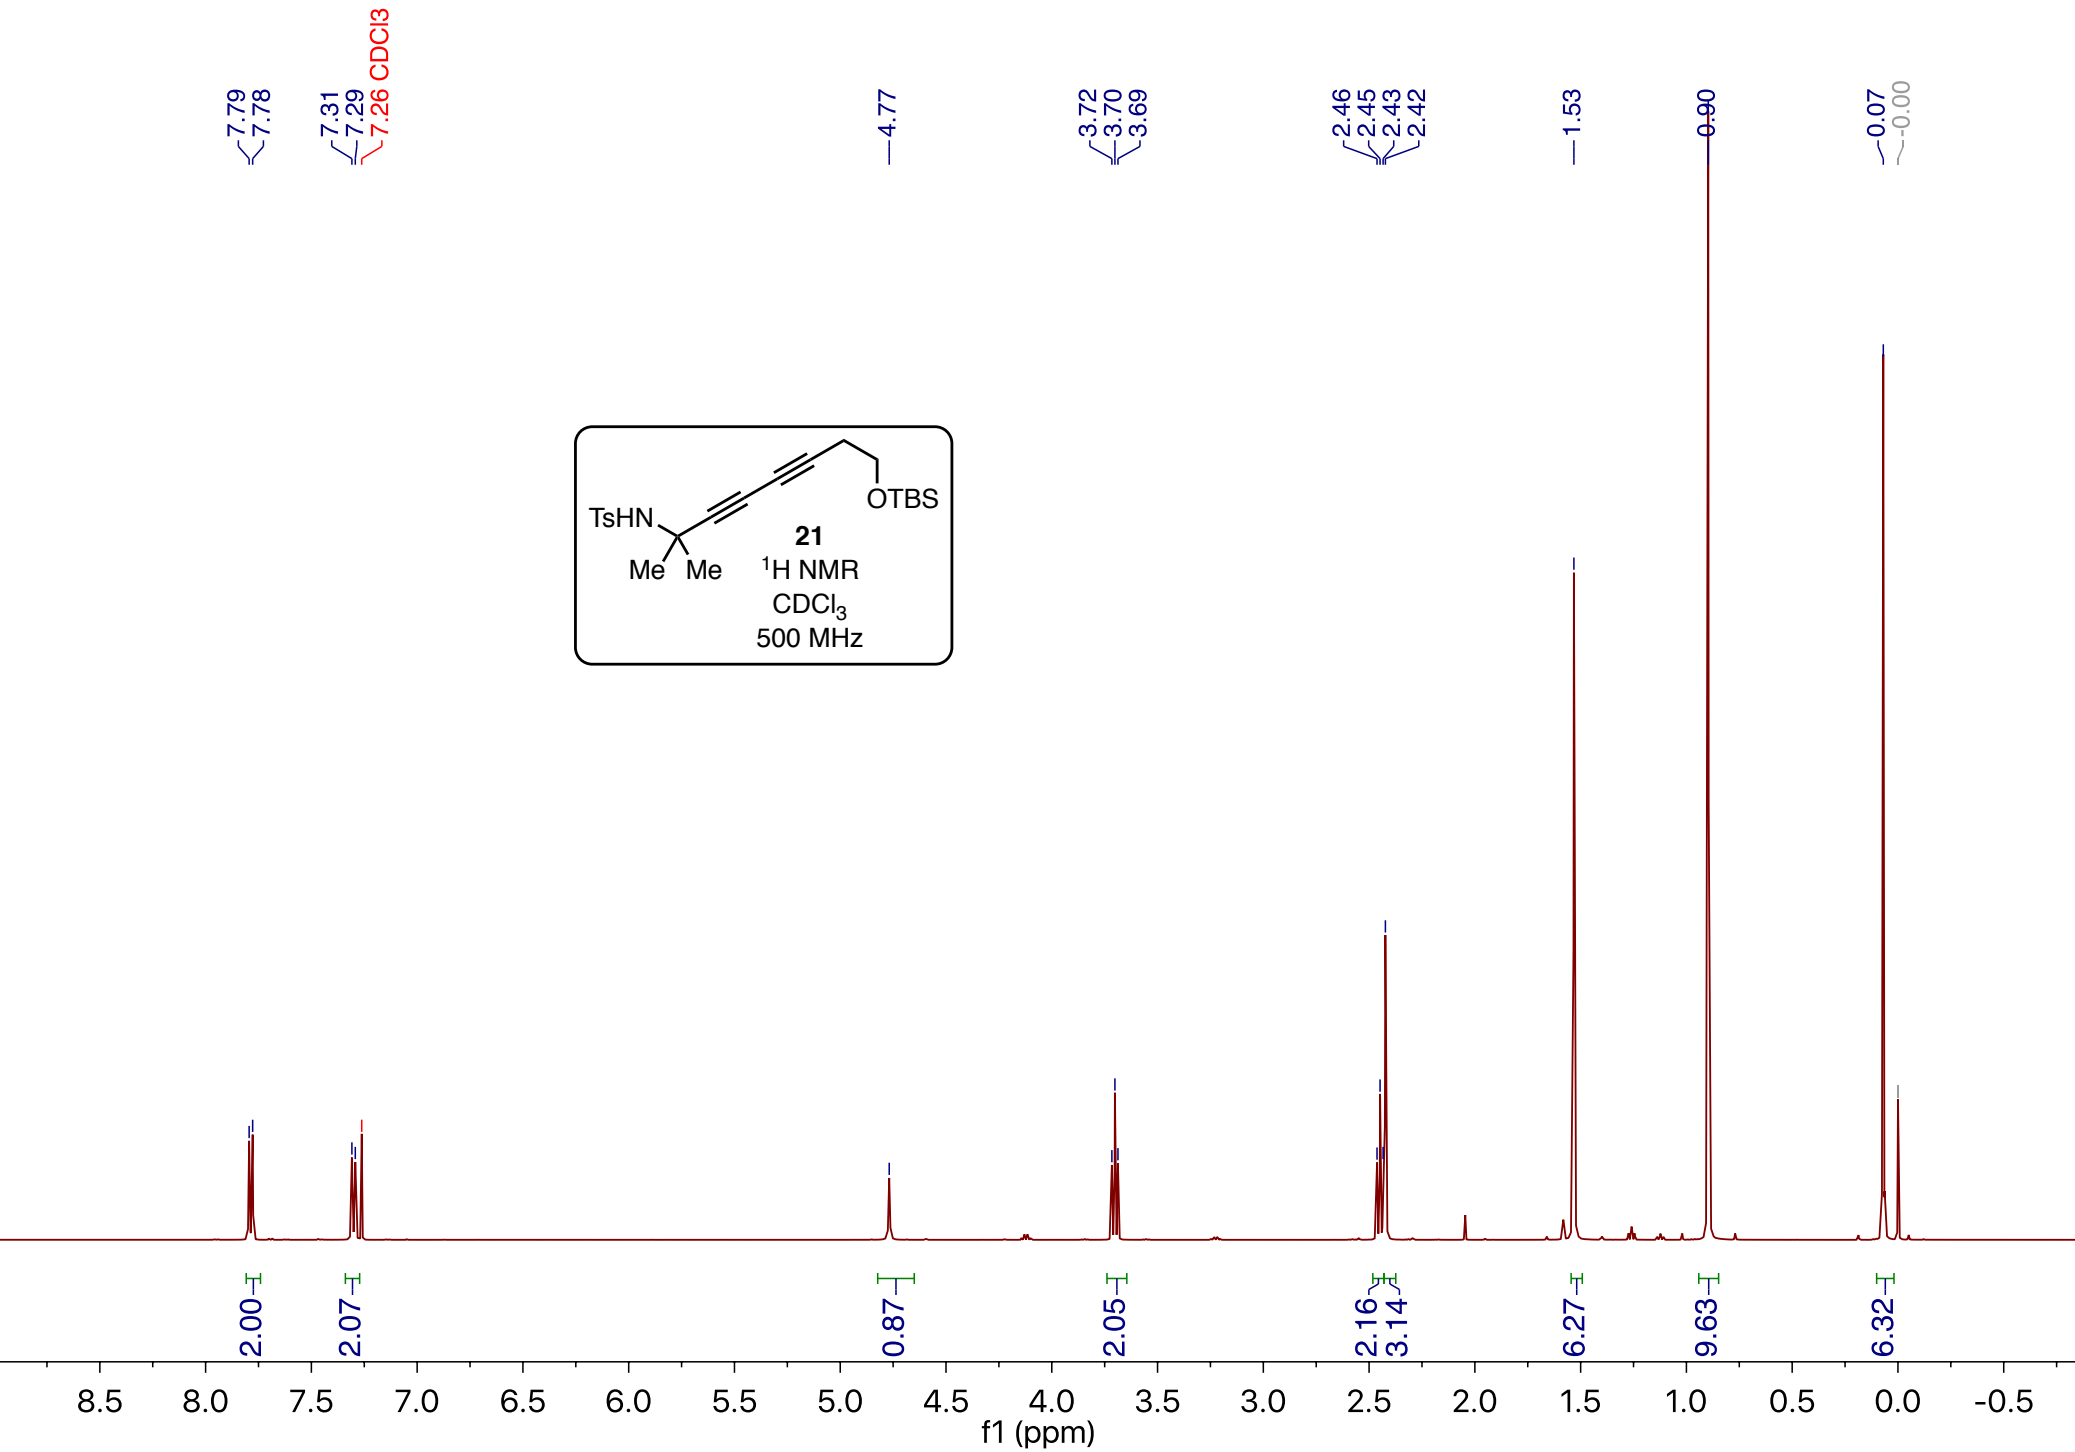

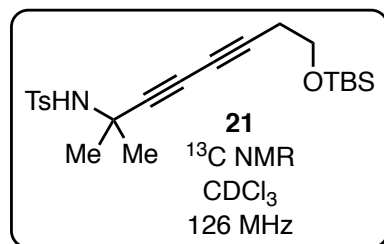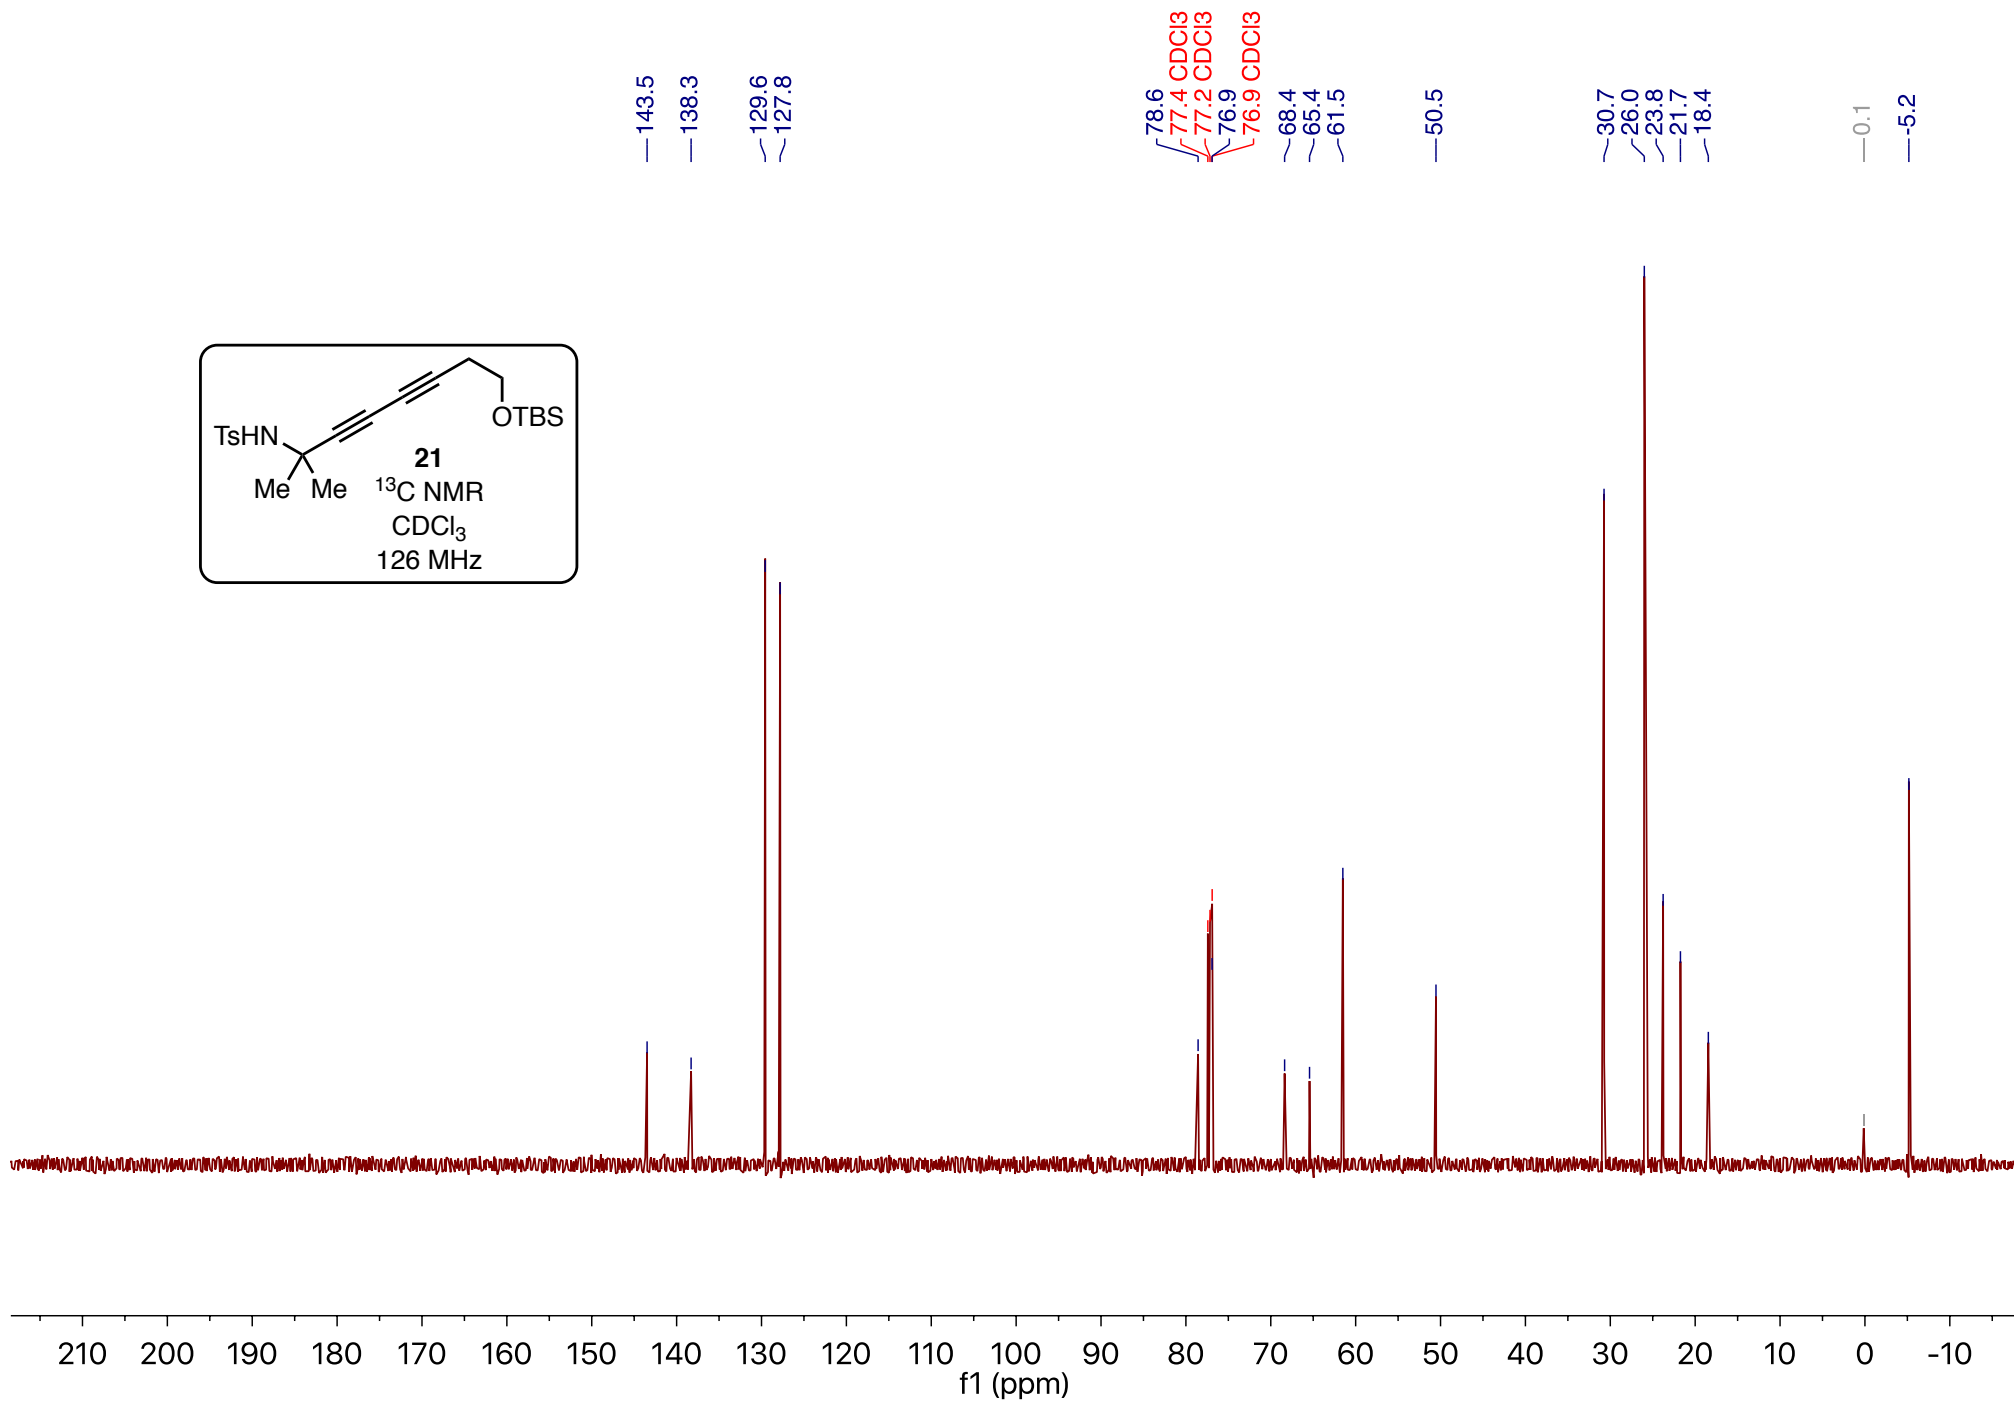

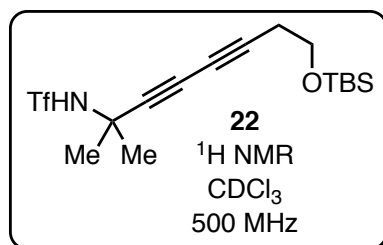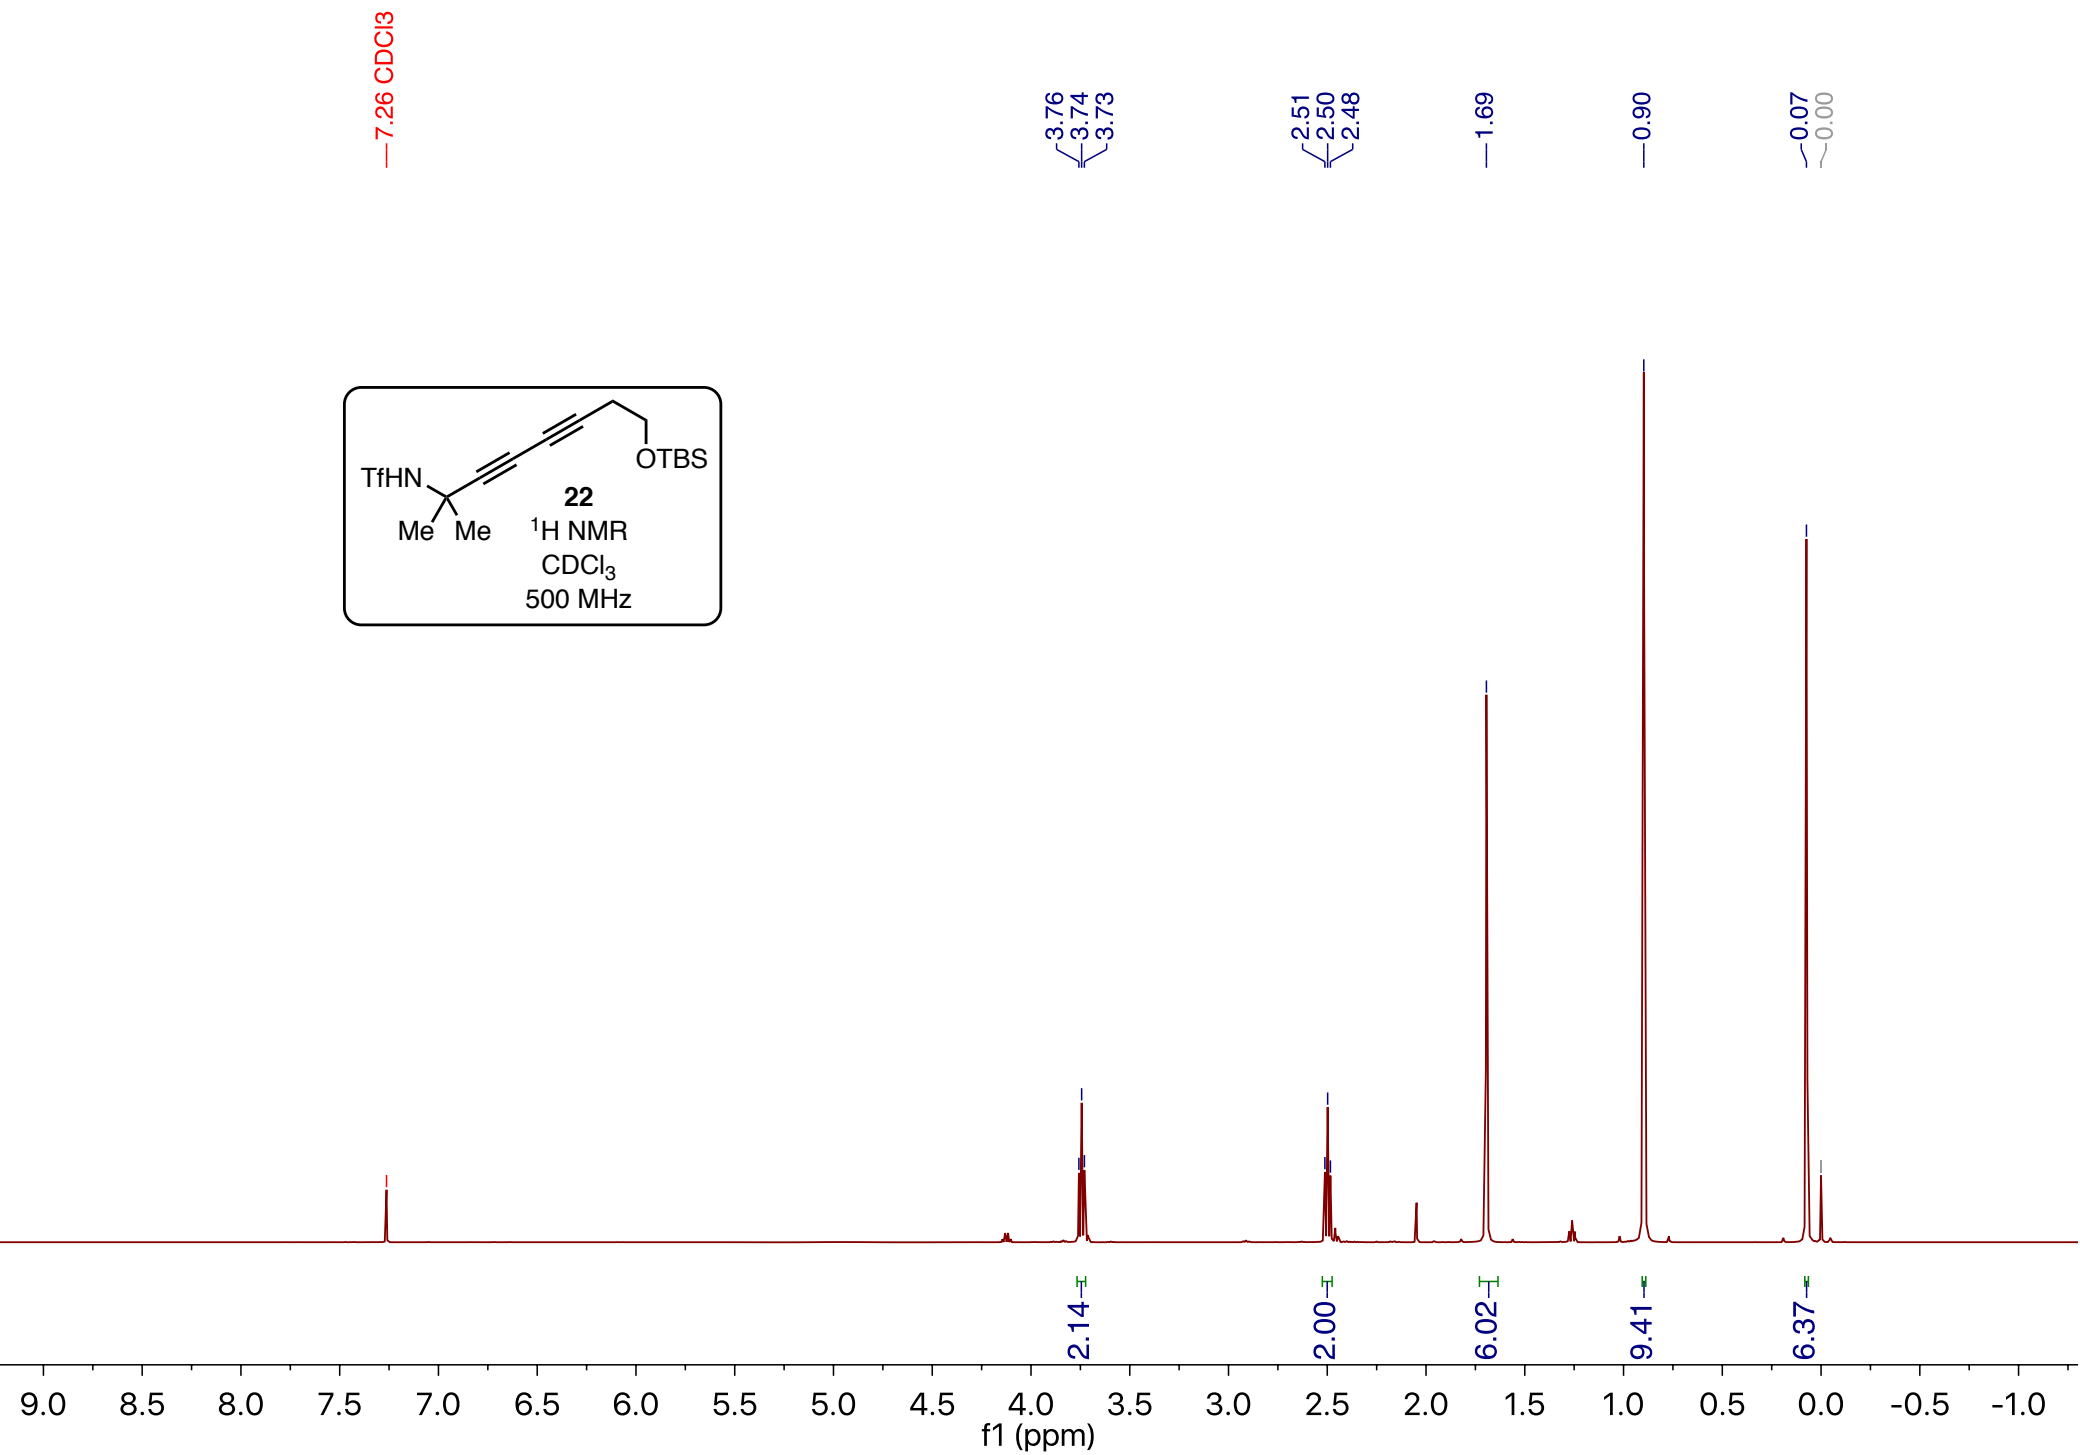



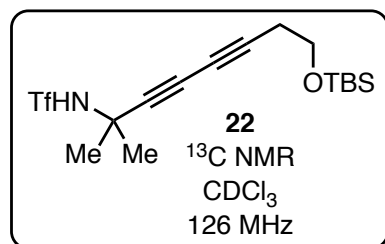

123.0  
120.5  
117.9  
115.6

80.0  
77.4 CDCI3  
77.2 CDCI3  
76.9 CDCI3  
75.9

69.0  
65.1  
61.3

53.6

30.7  
26.0  
23.8  
18.4

-5.2

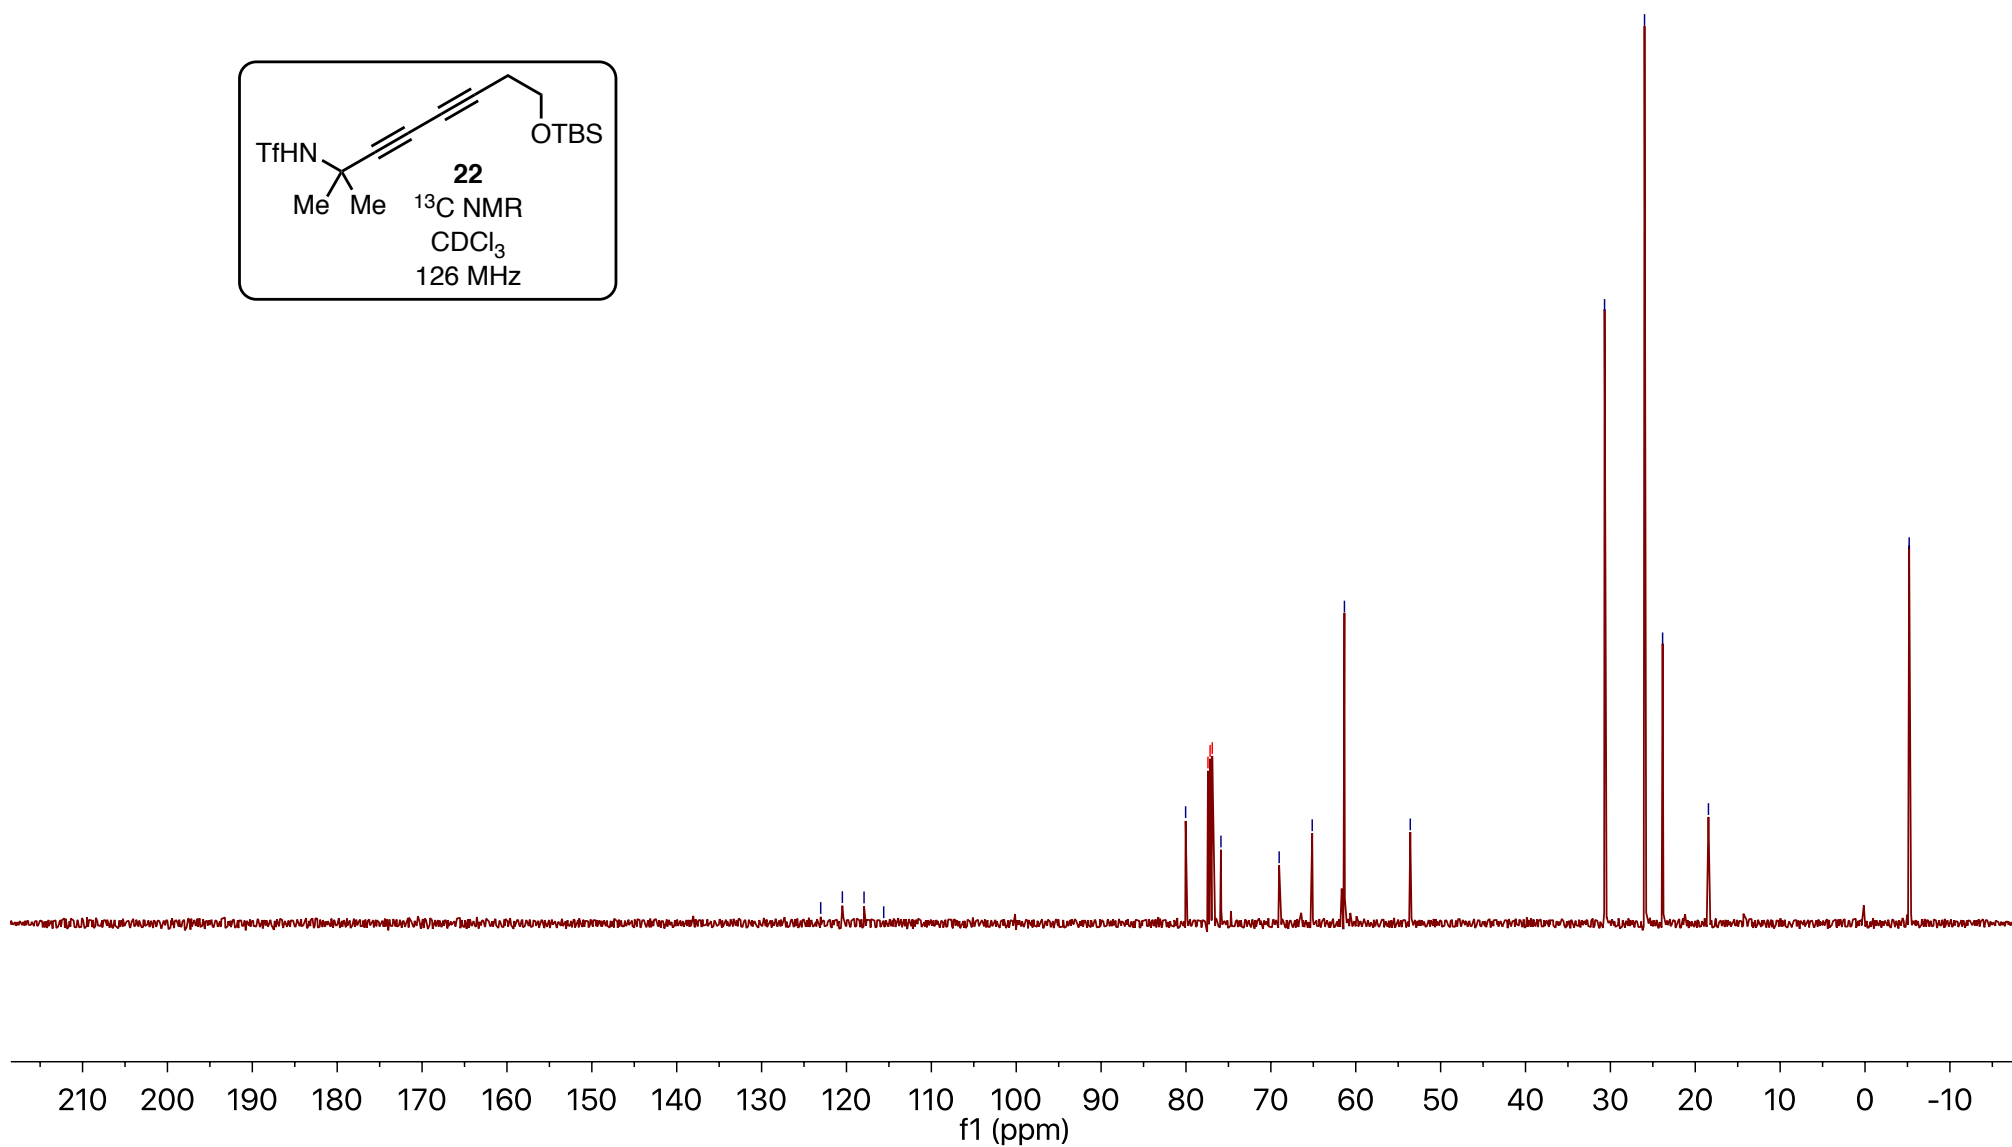

7.91  
7.89  
7.42  
7.40  
7.38  
7.26 CDCl<sub>3</sub>  
7.22  
7.20  
7.19  
7.03  
7.01

4.62  
4.60  
4.58

3.33  
3.31  
3.30

—2.35

—1.98

—1.54 H<sub>2</sub>O

—0.90

—0.50

—0.00

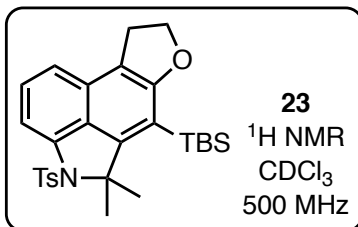

2.00

1.04

2.94

0.98

2.06

2.03

3.02

6.06

9.22

6.11

8.5 8.0 7.5 7.0 6.5 6.0 5.5 5.0 4.5 4.0 3.5 3.0 2.5 2.0 1.5 1.0 0.5 0.0 -0.5 -1.0

f1 (ppm)

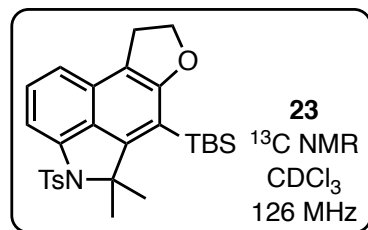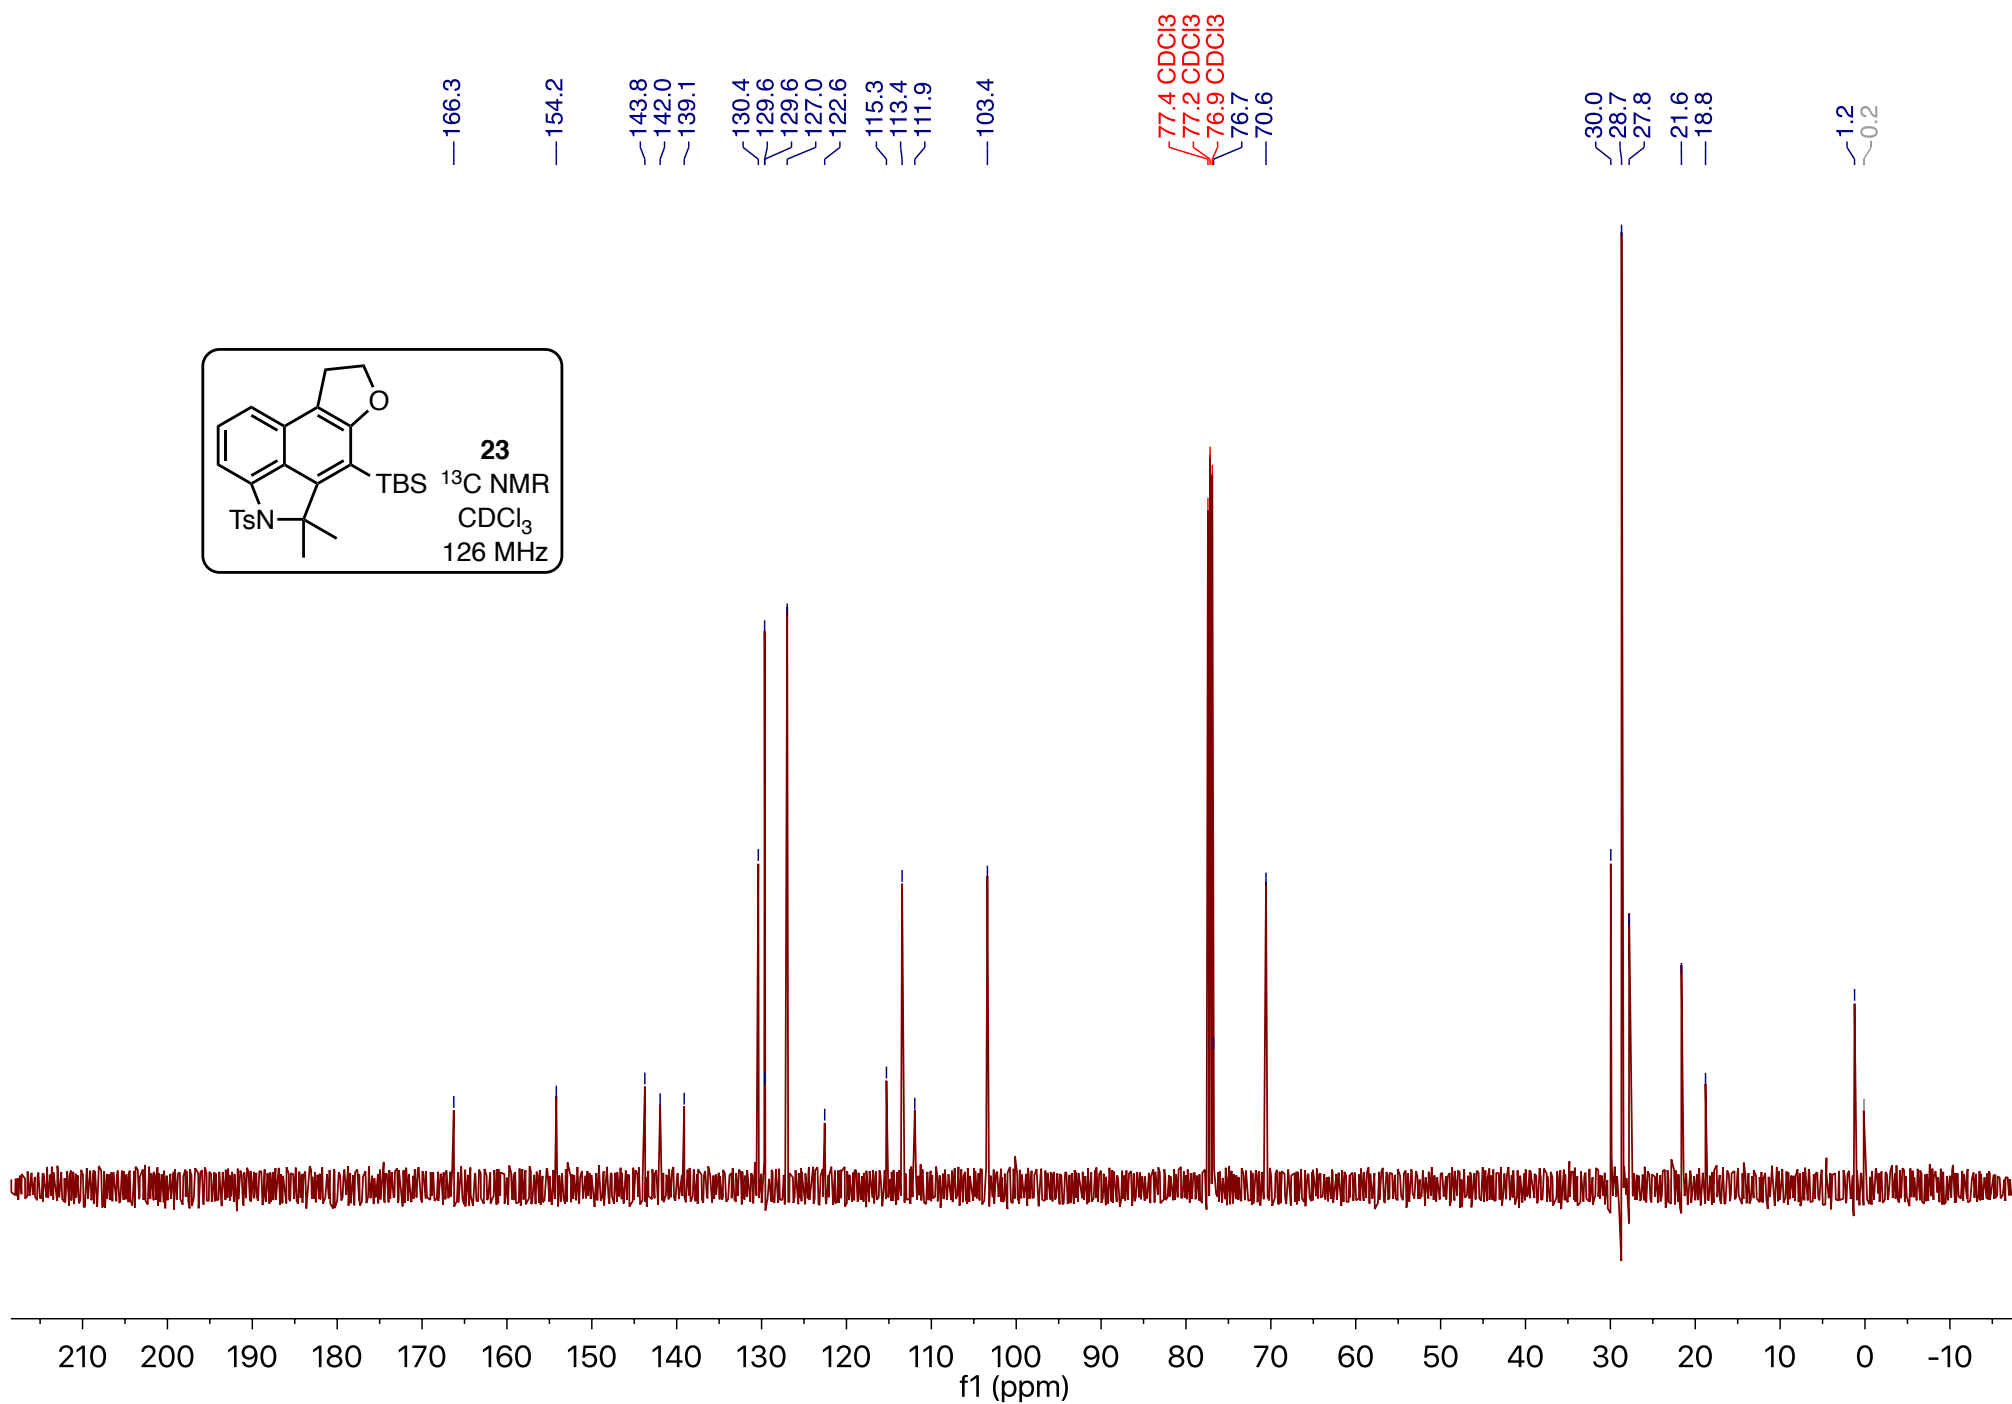

7.45  
7.44  
7.42  
7.26 CDCl<sub>3</sub>  
7.18  
7.16  
7.14  
7.12

4.69  
4.68  
4.66  
4.64  
4.62  
4.60

3.42  
3.40  
3.39  
3.38  
3.37  
3.36  
3.35  
3.35  
3.33  
3.32

2.05  
2.03

0.93

0.54  
0.50

-0.00

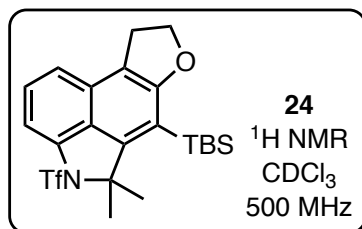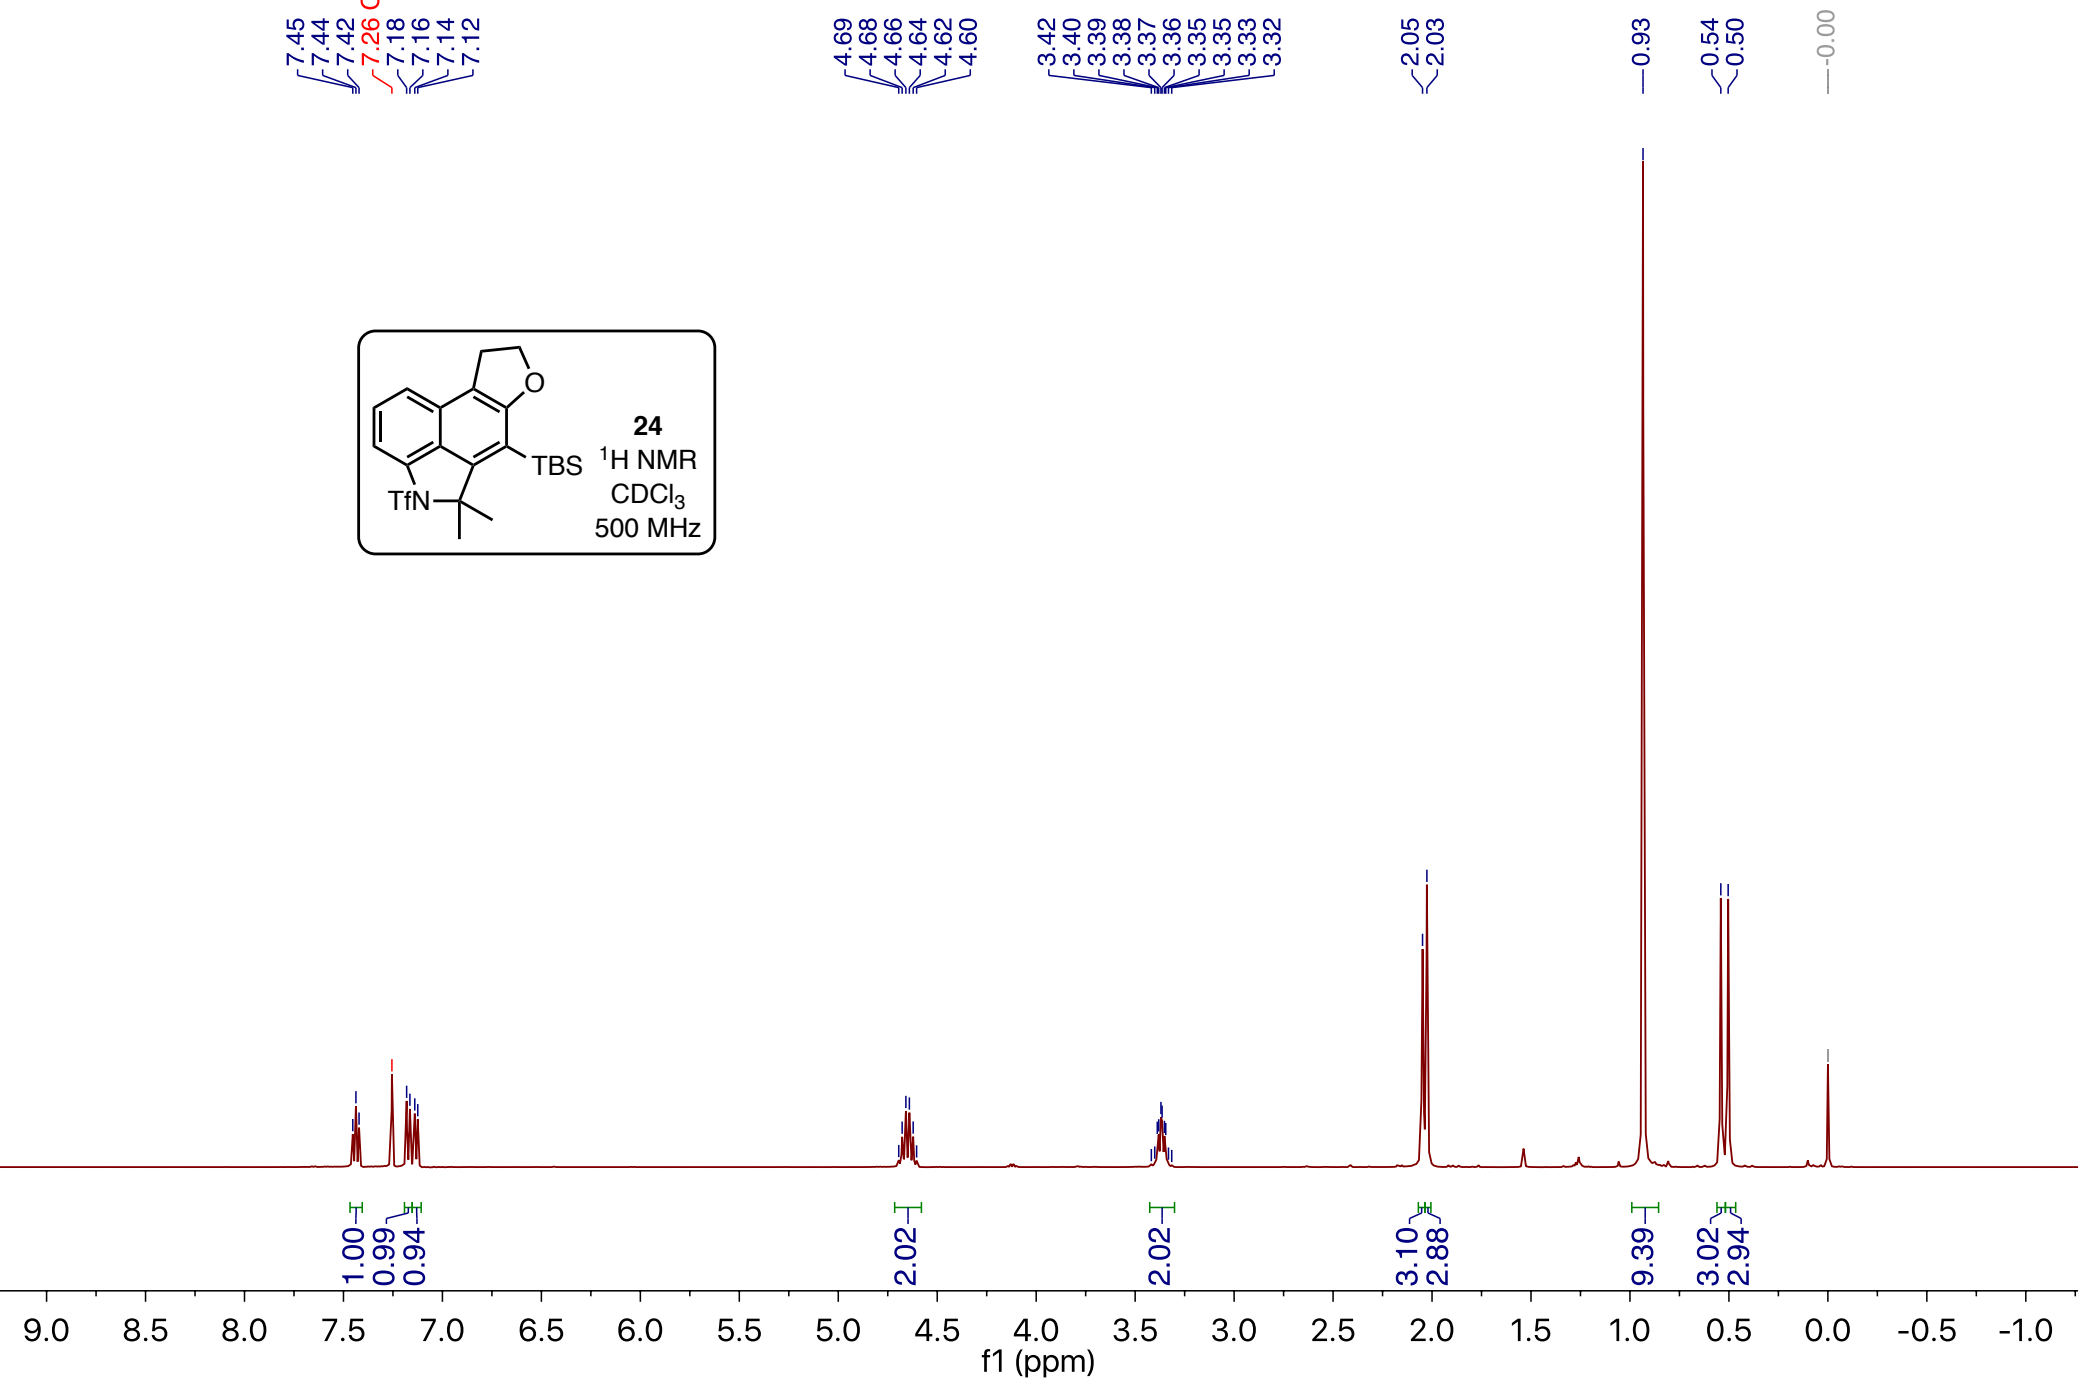

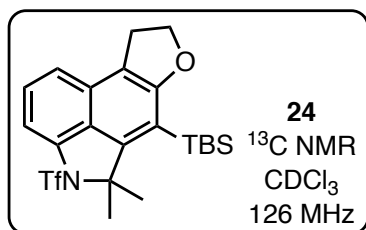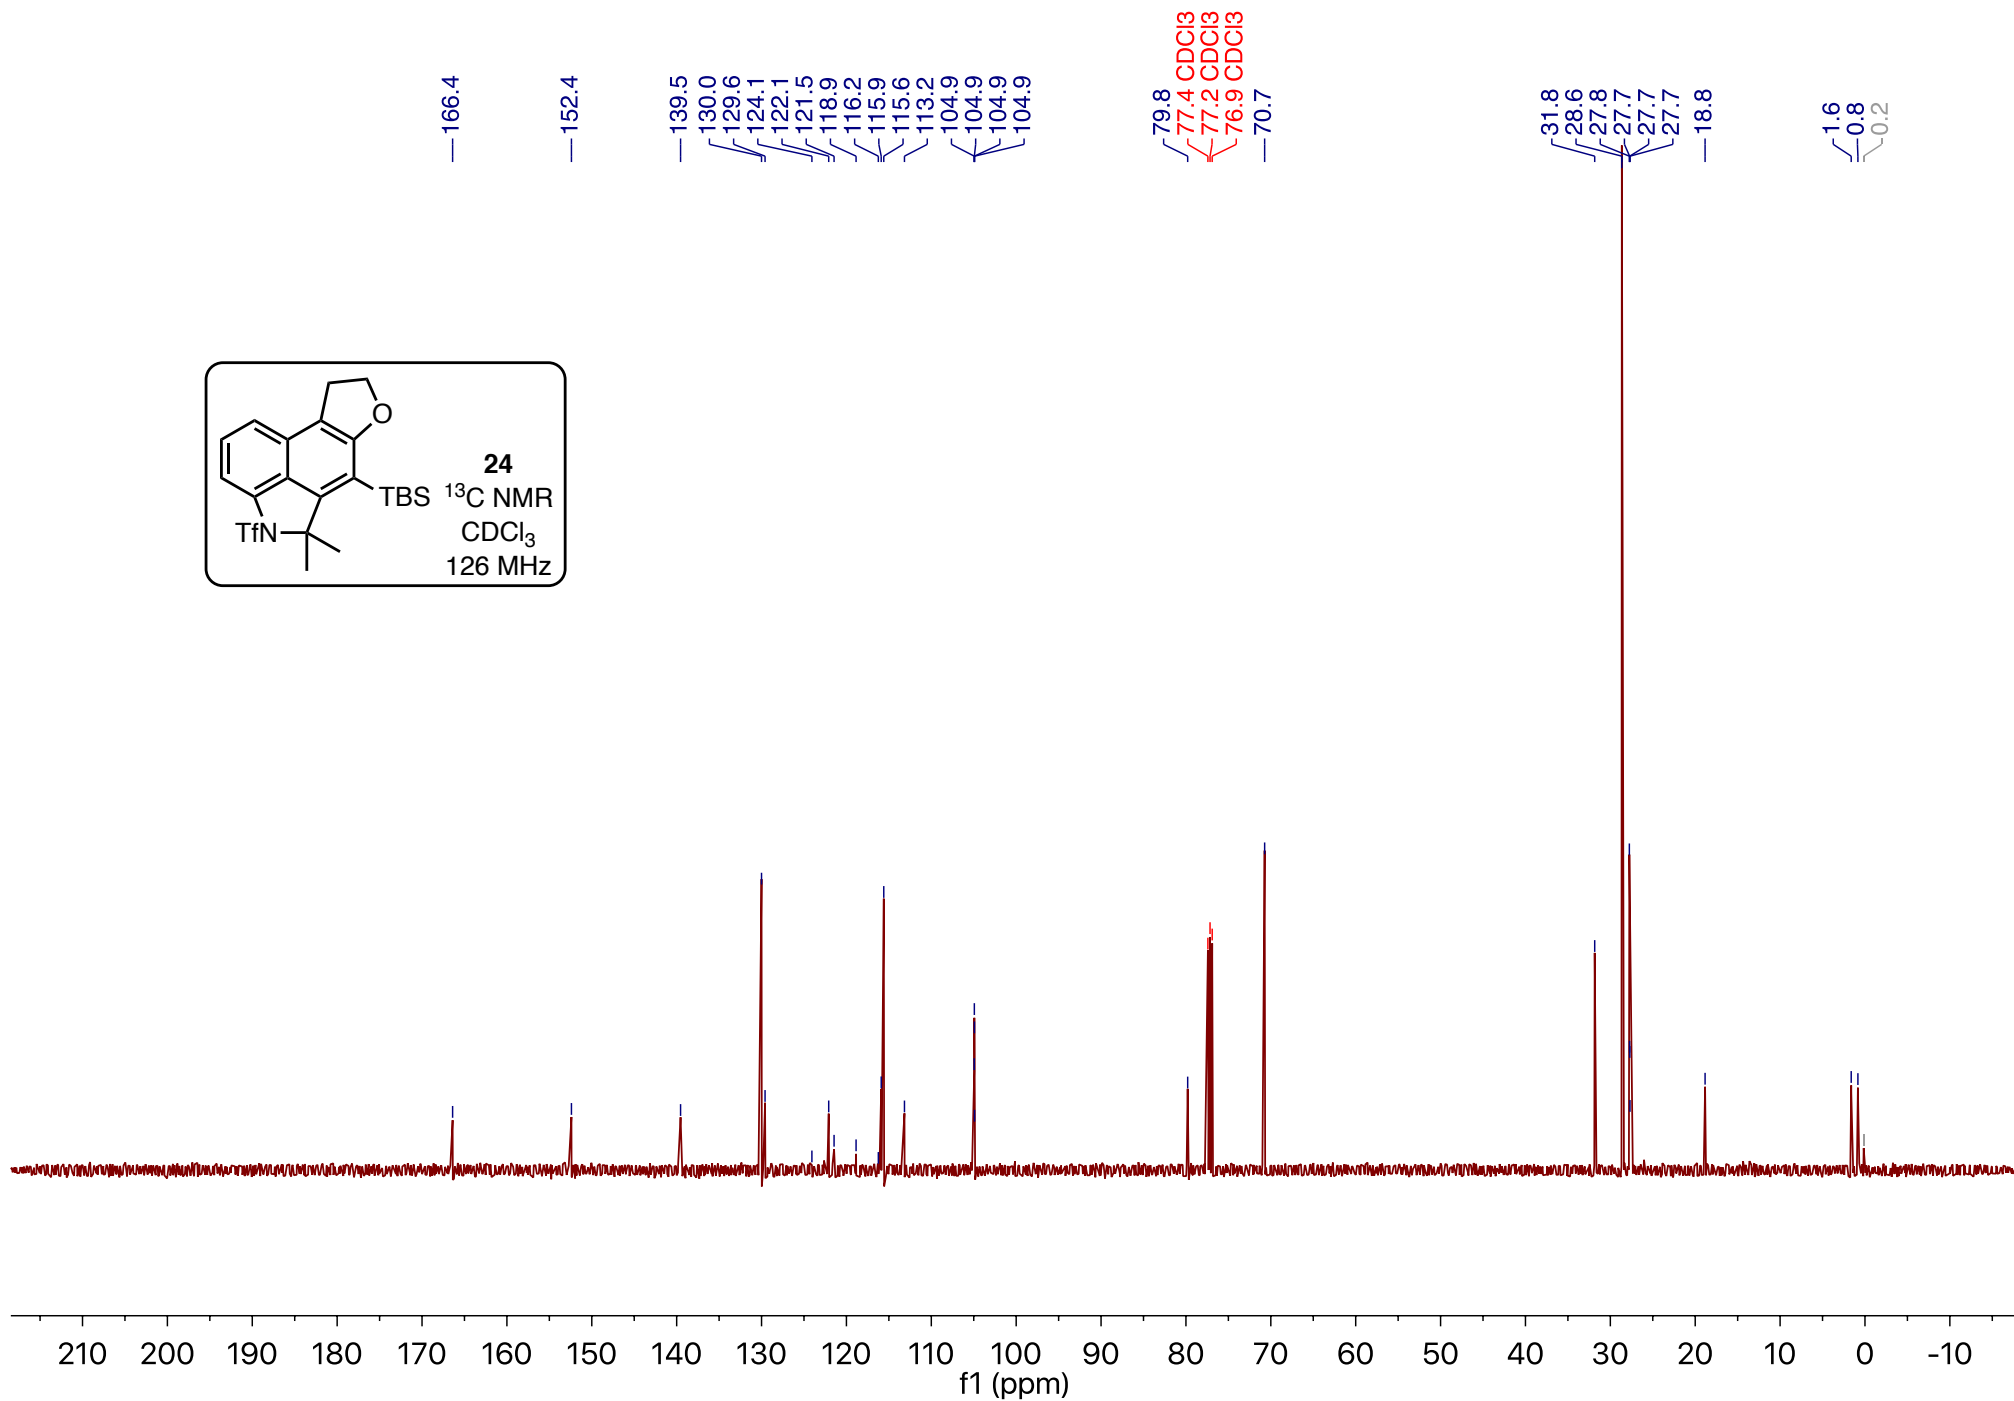

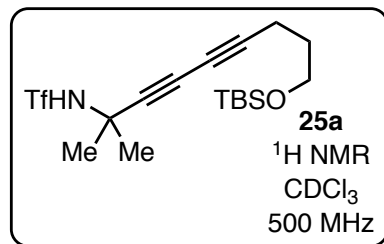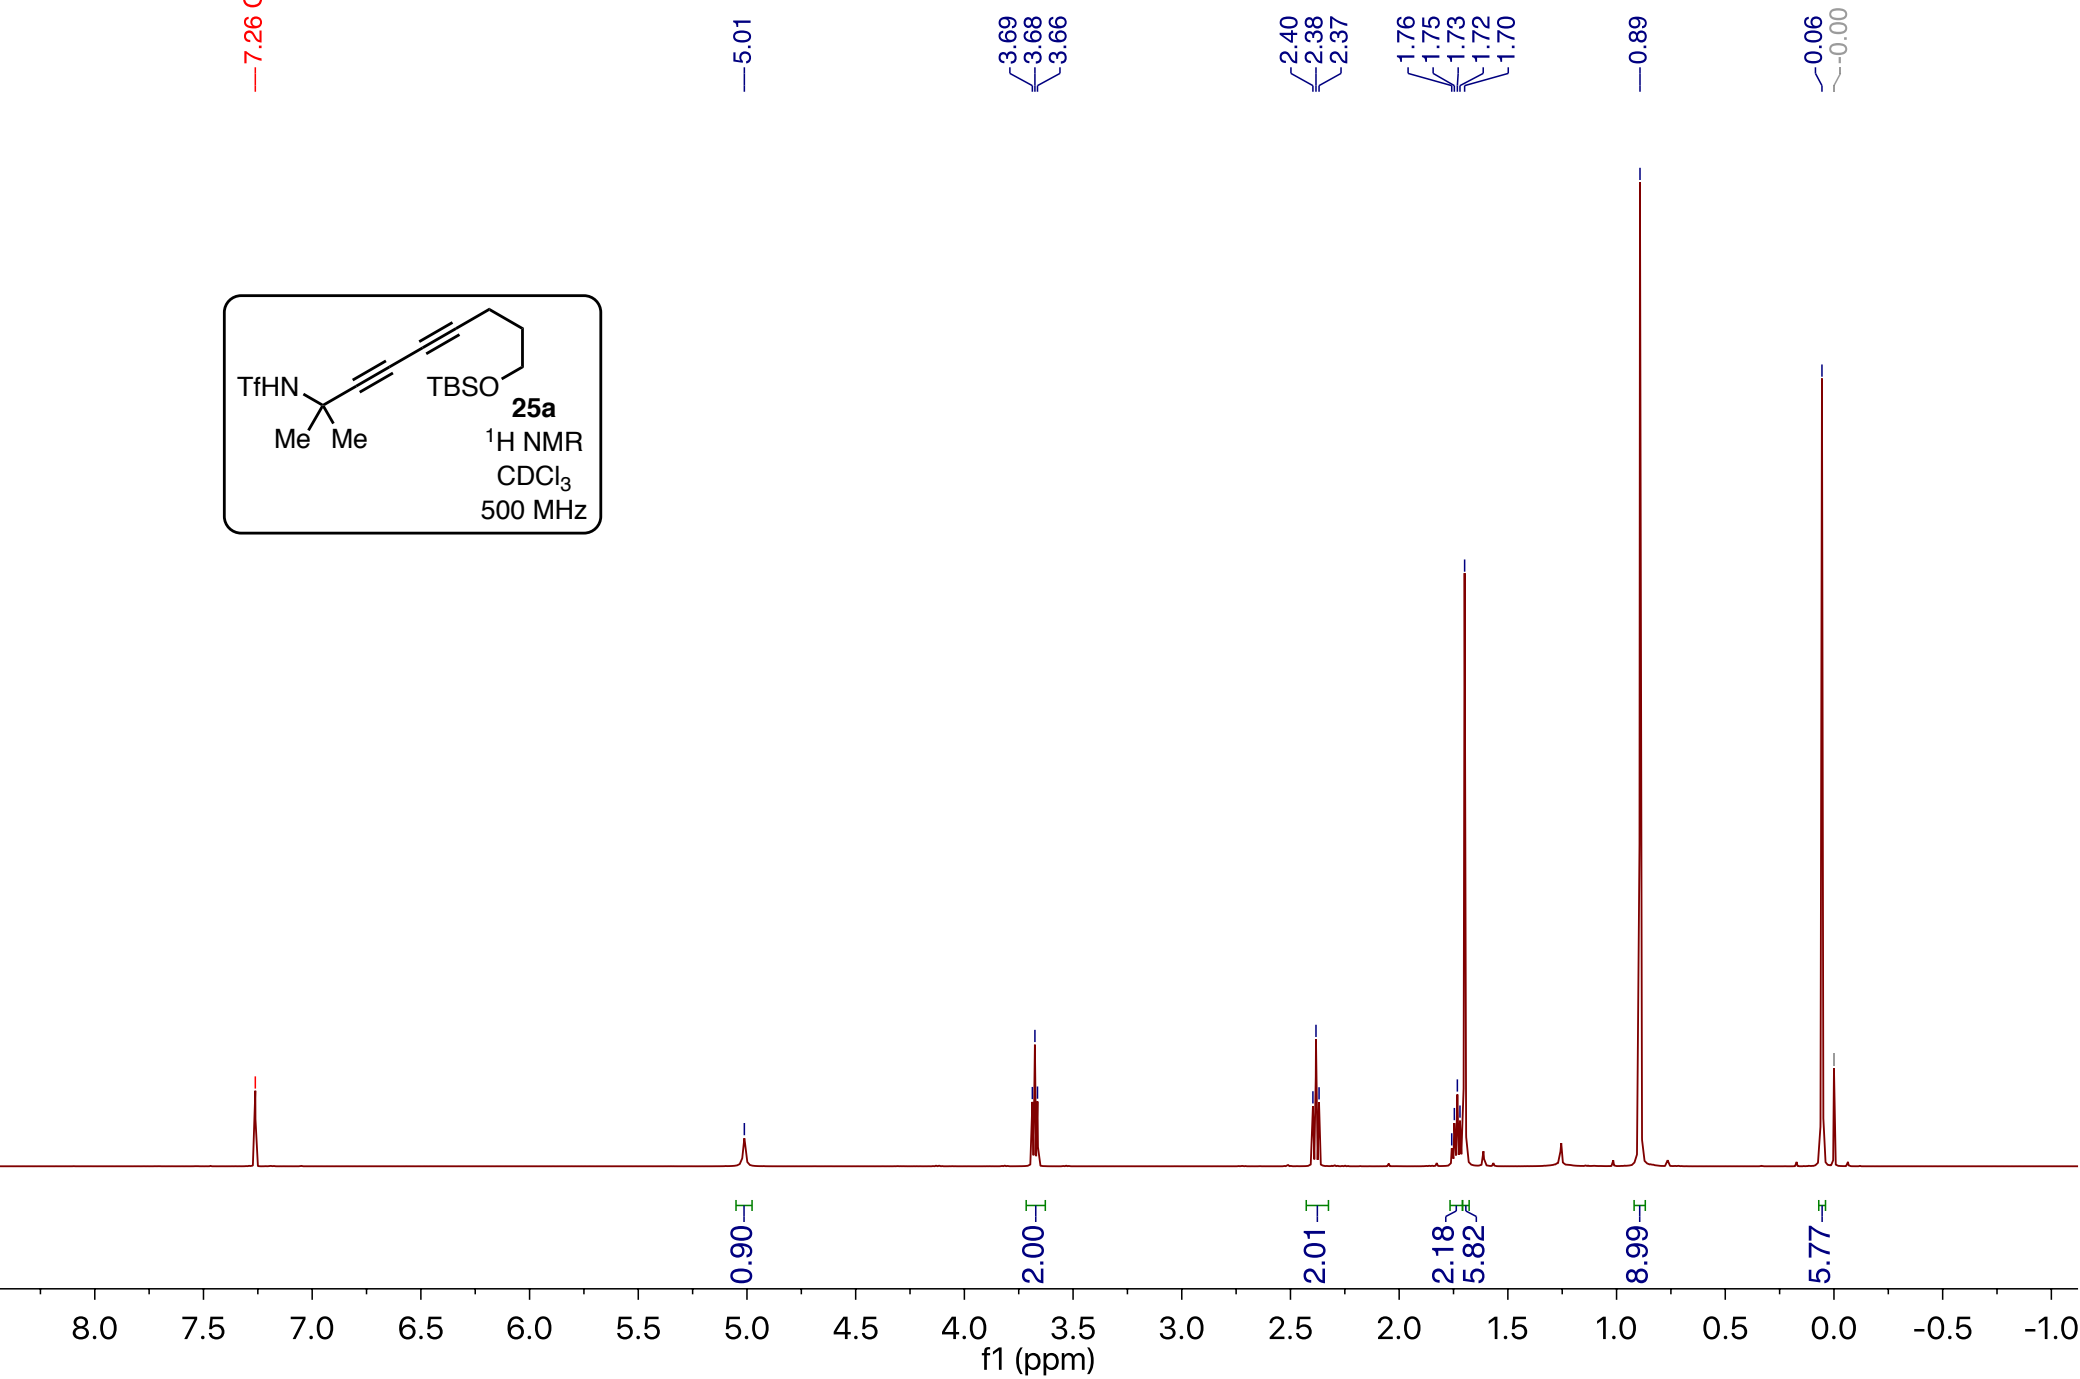

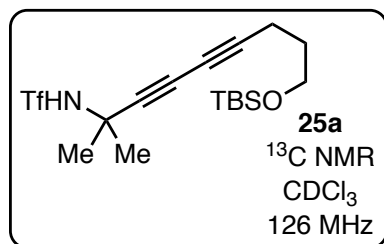

123.0  
120.5  
117.9  
115.3  
82.8  
77.4 CDCI3  
77.2 CDCI3  
76.9 CDCI3  
75.6  
69.2  
64.1  
61.4  
53.7  
31.2  
30.7  
26.0  
18.4  
15.9  
0.1  
-5.2

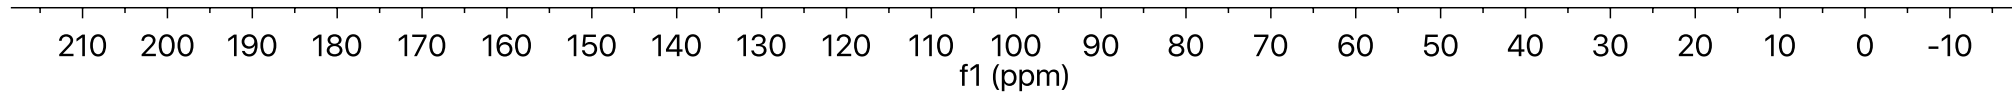

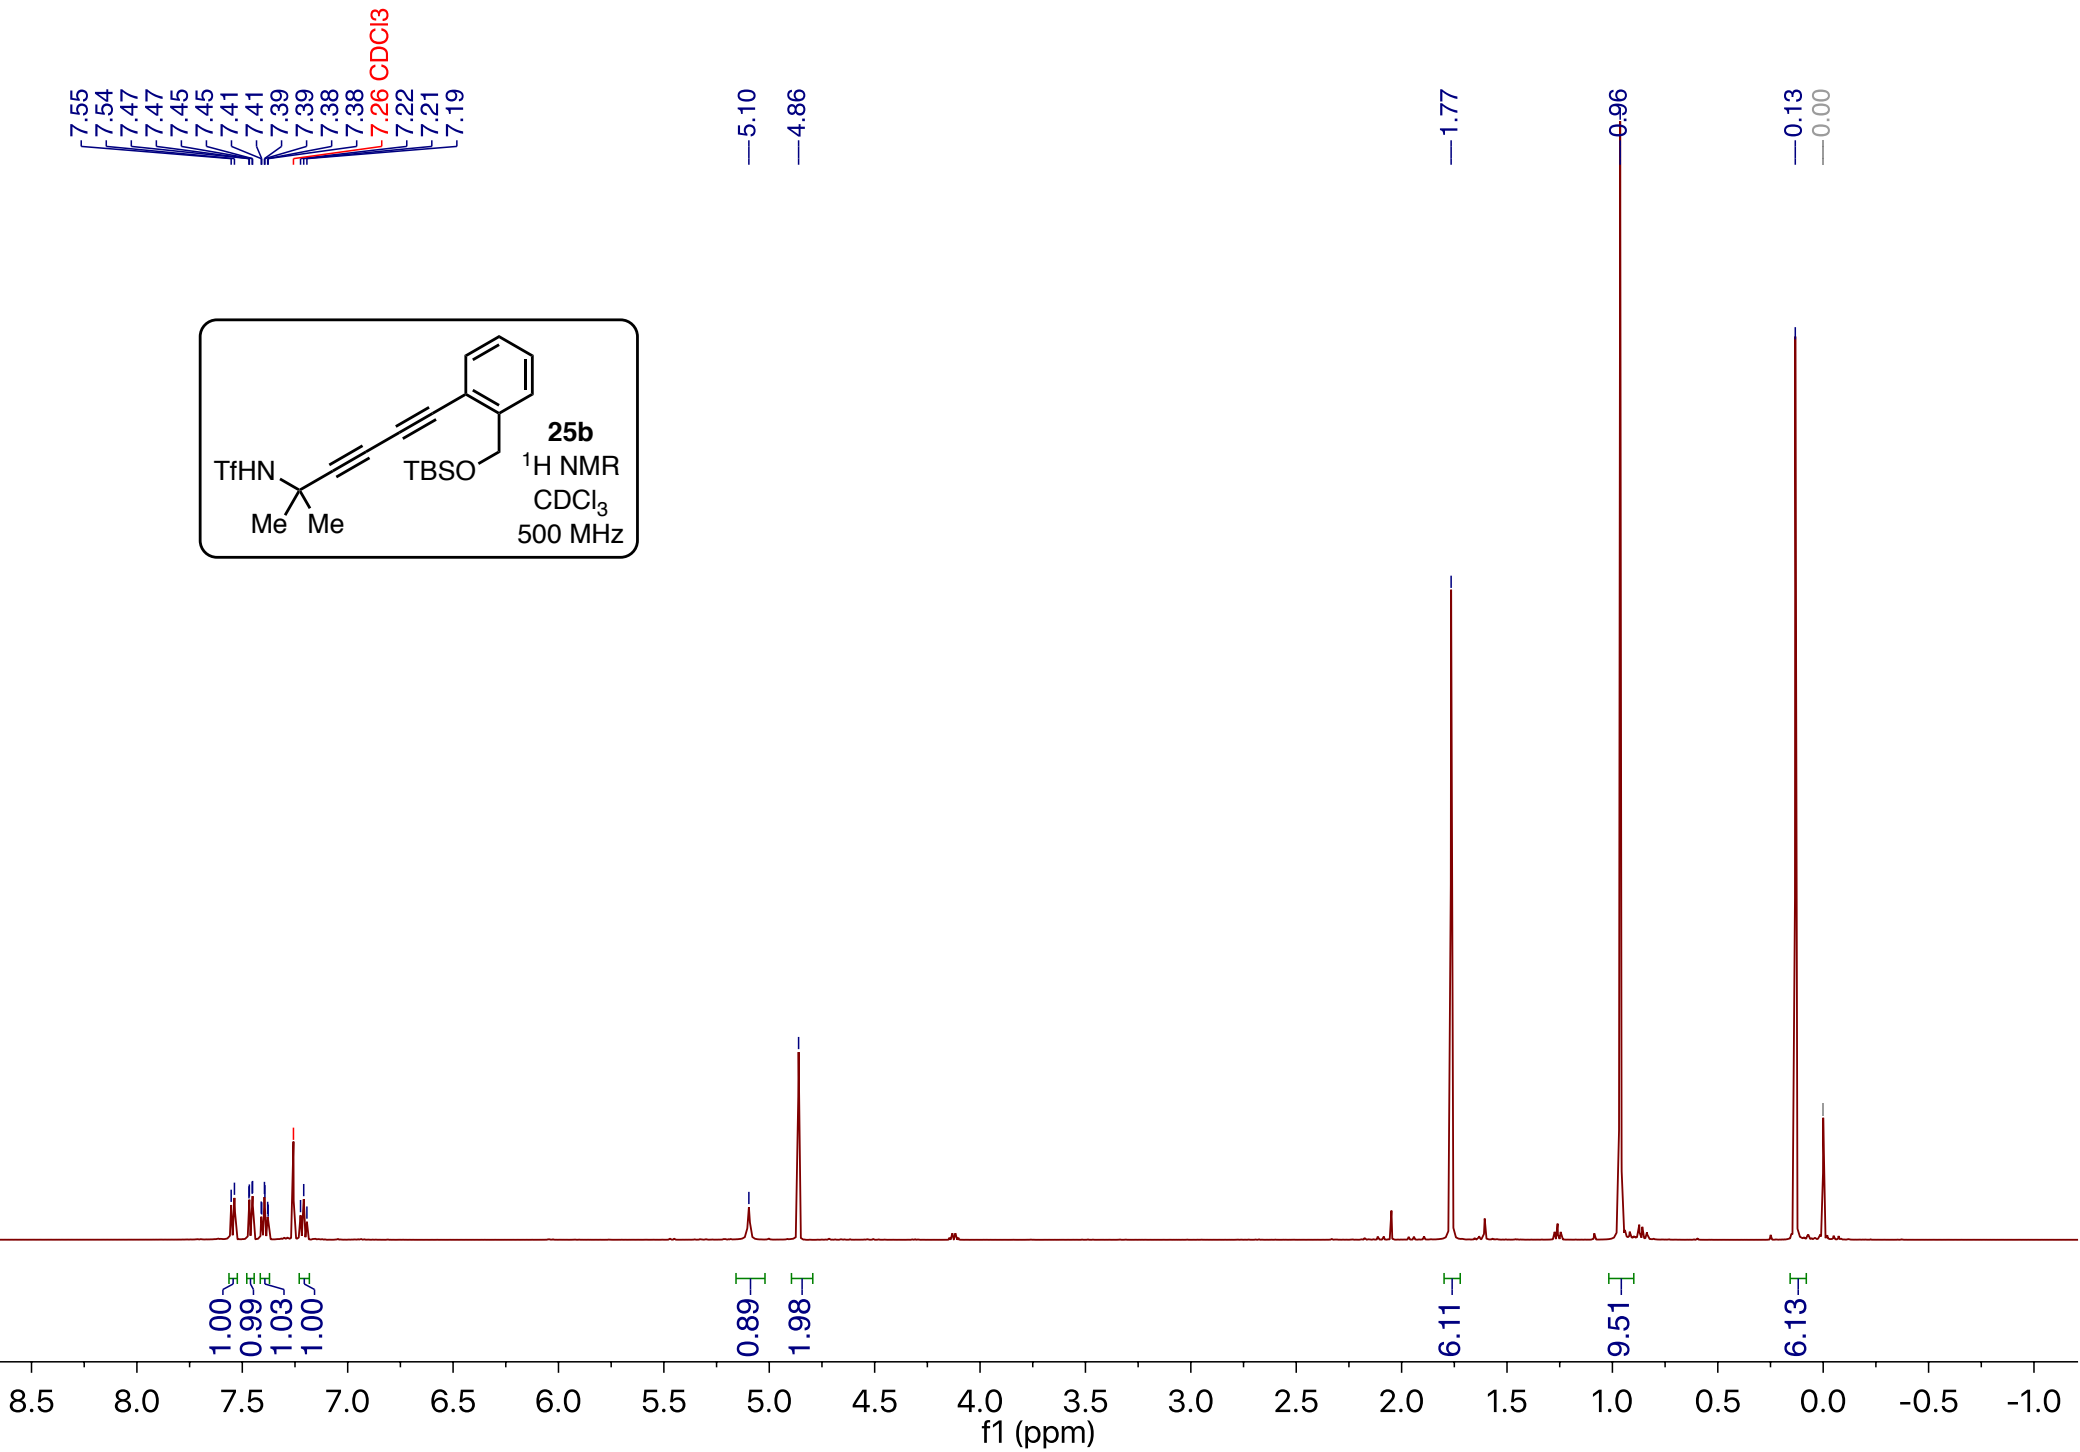



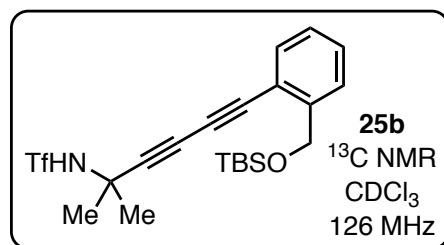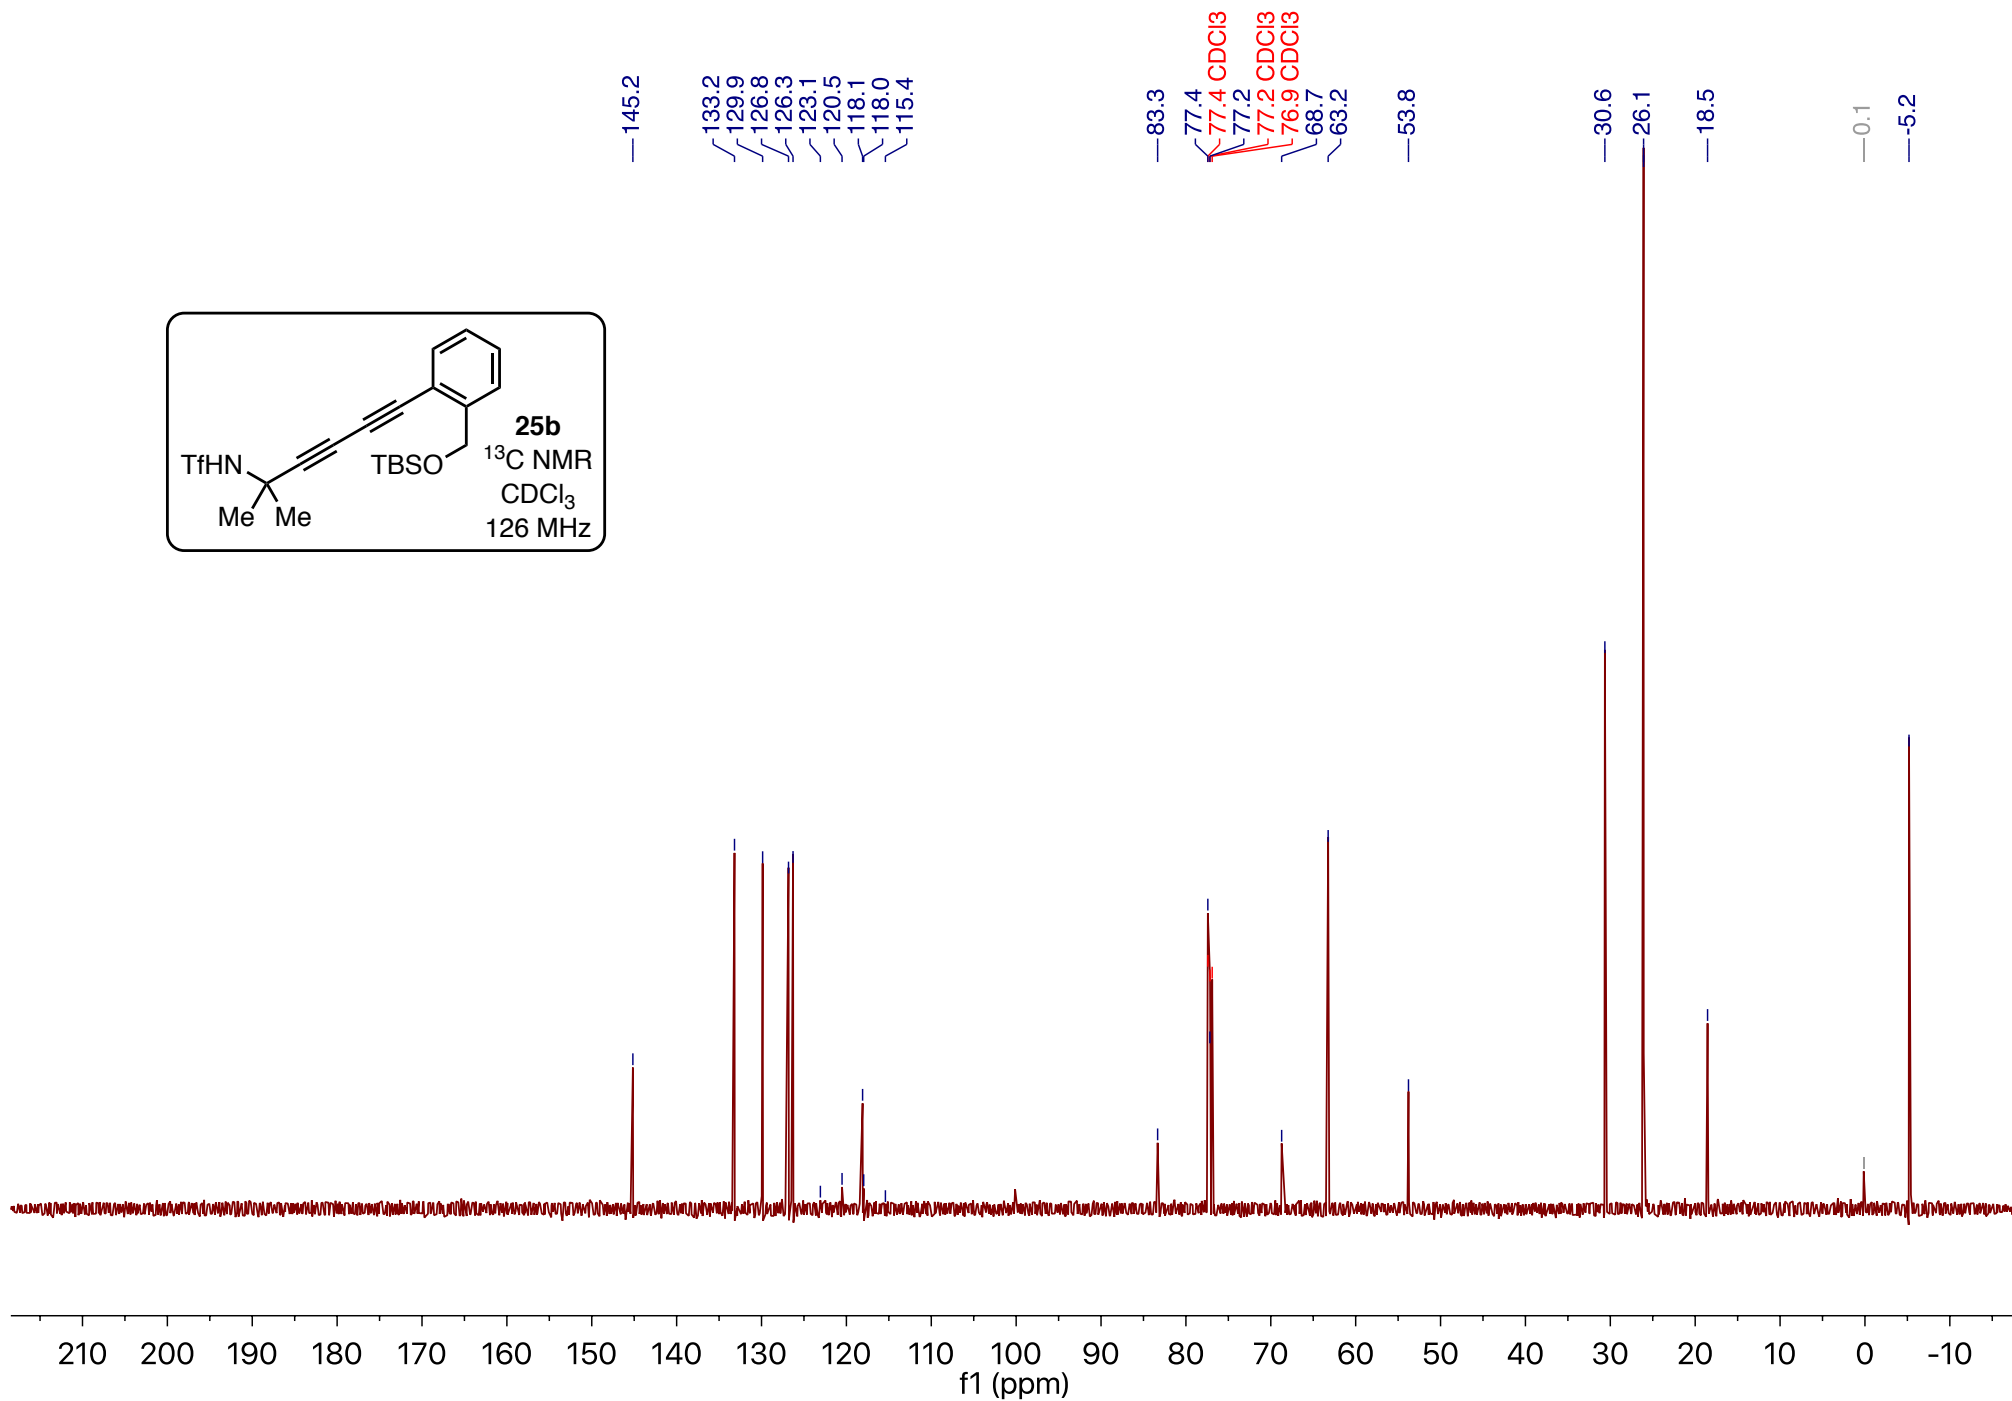

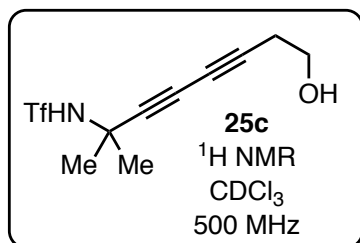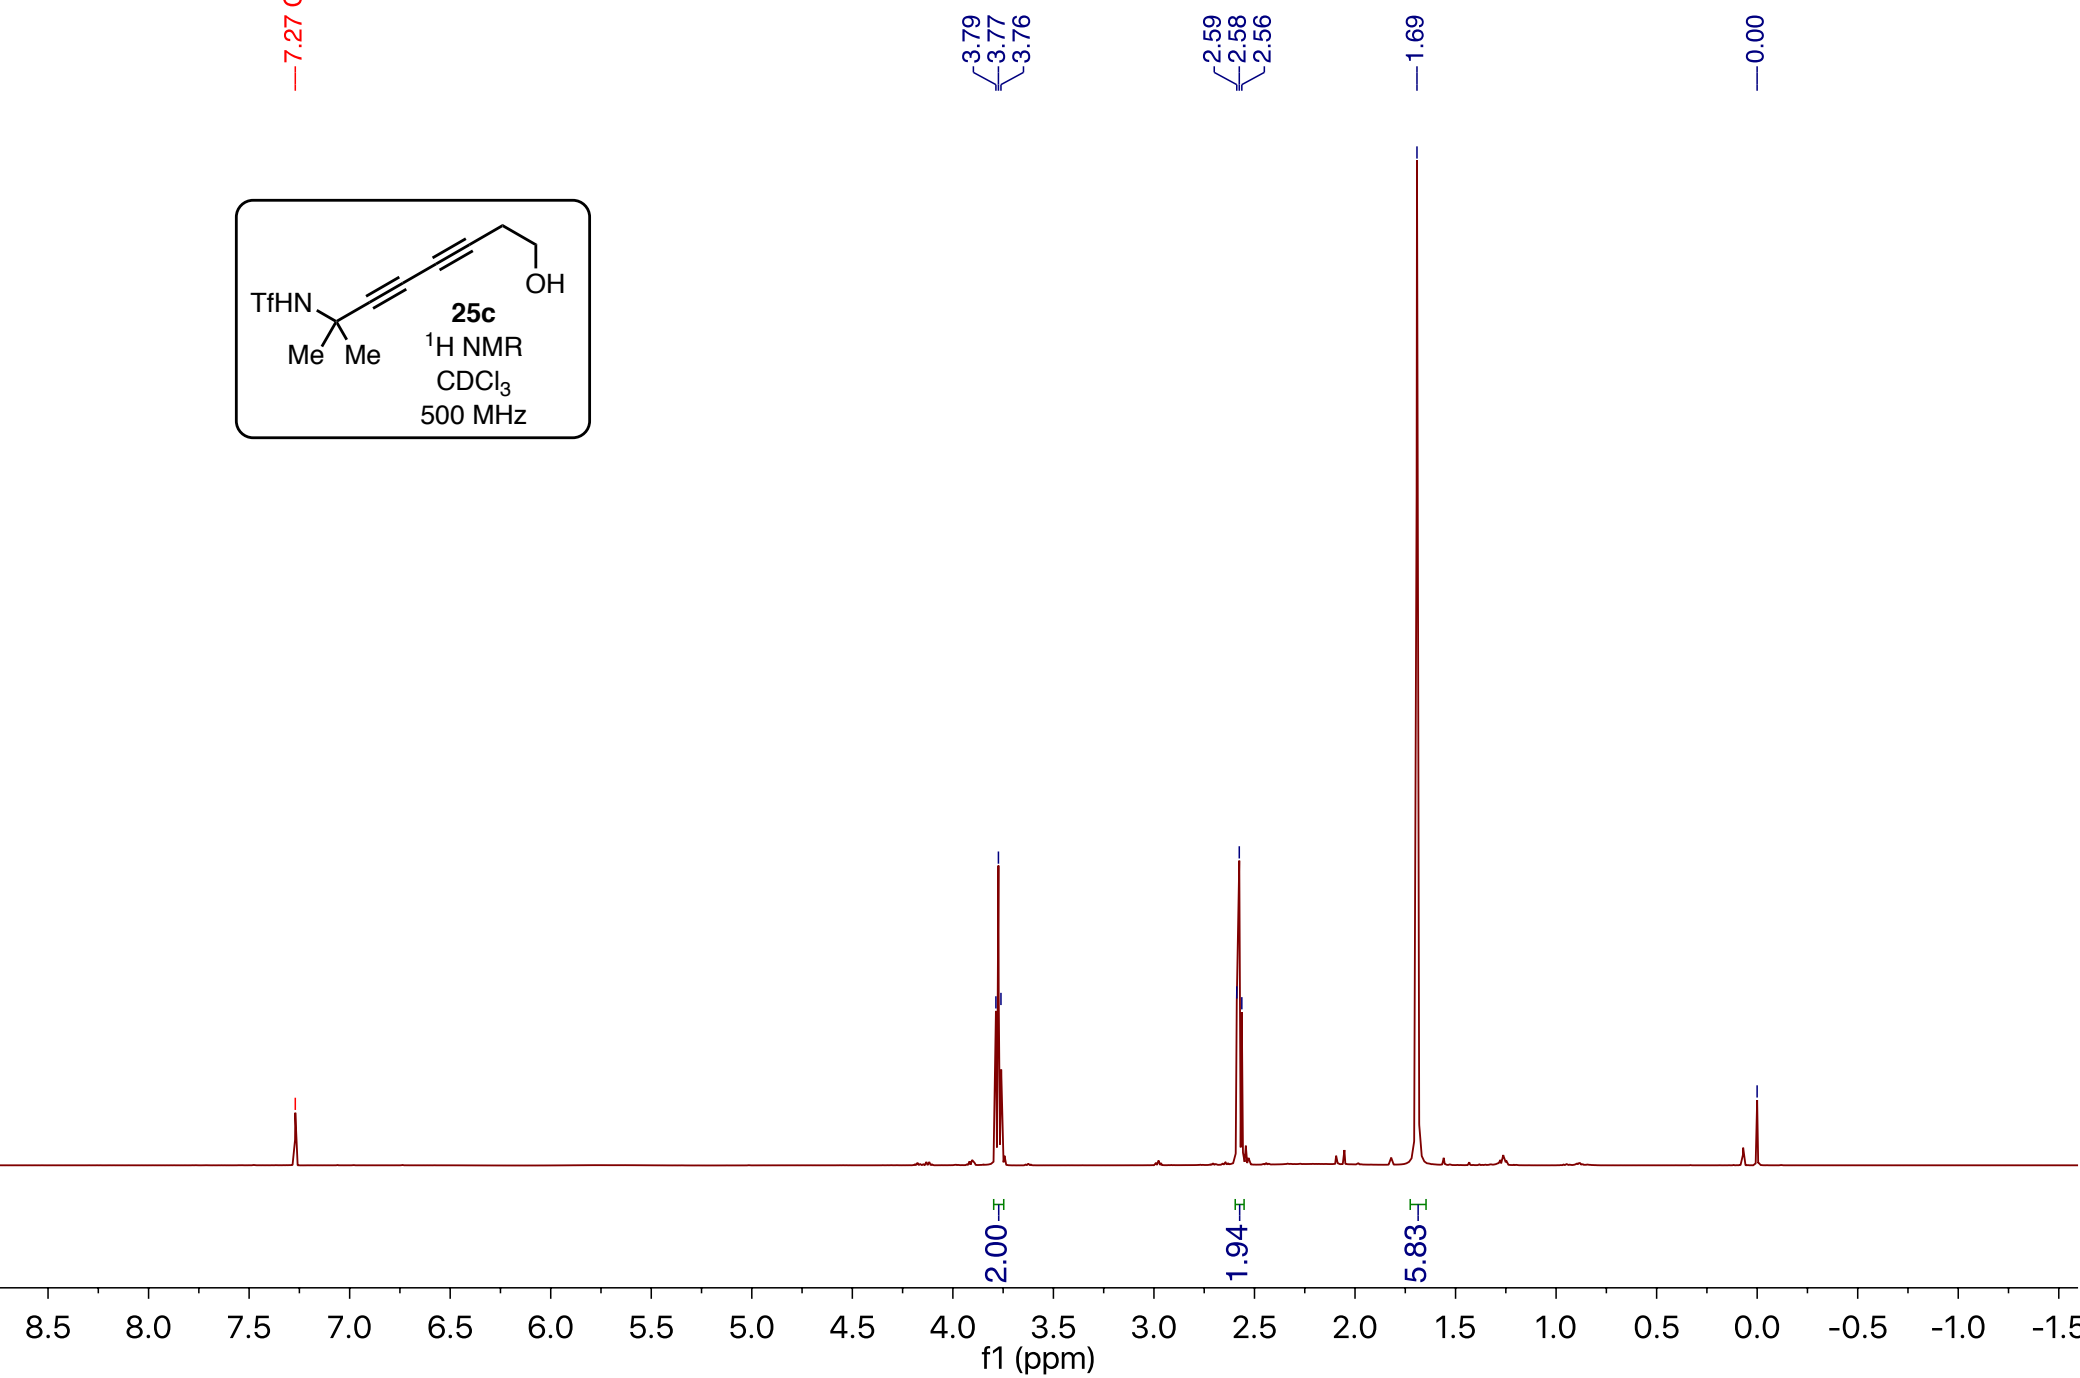

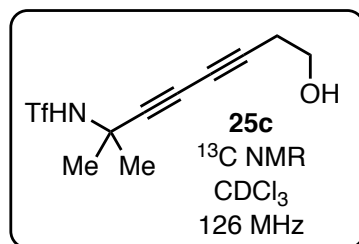

123.0  
120.5  
117.9  
115.4  
79.2  
77.4 CDCI3  
77.2 CDCI3  
76.9 CDCI3  
76.5  
68.6  
65.8  
60.7  
53.3  
30.6  
23.7  
0.1

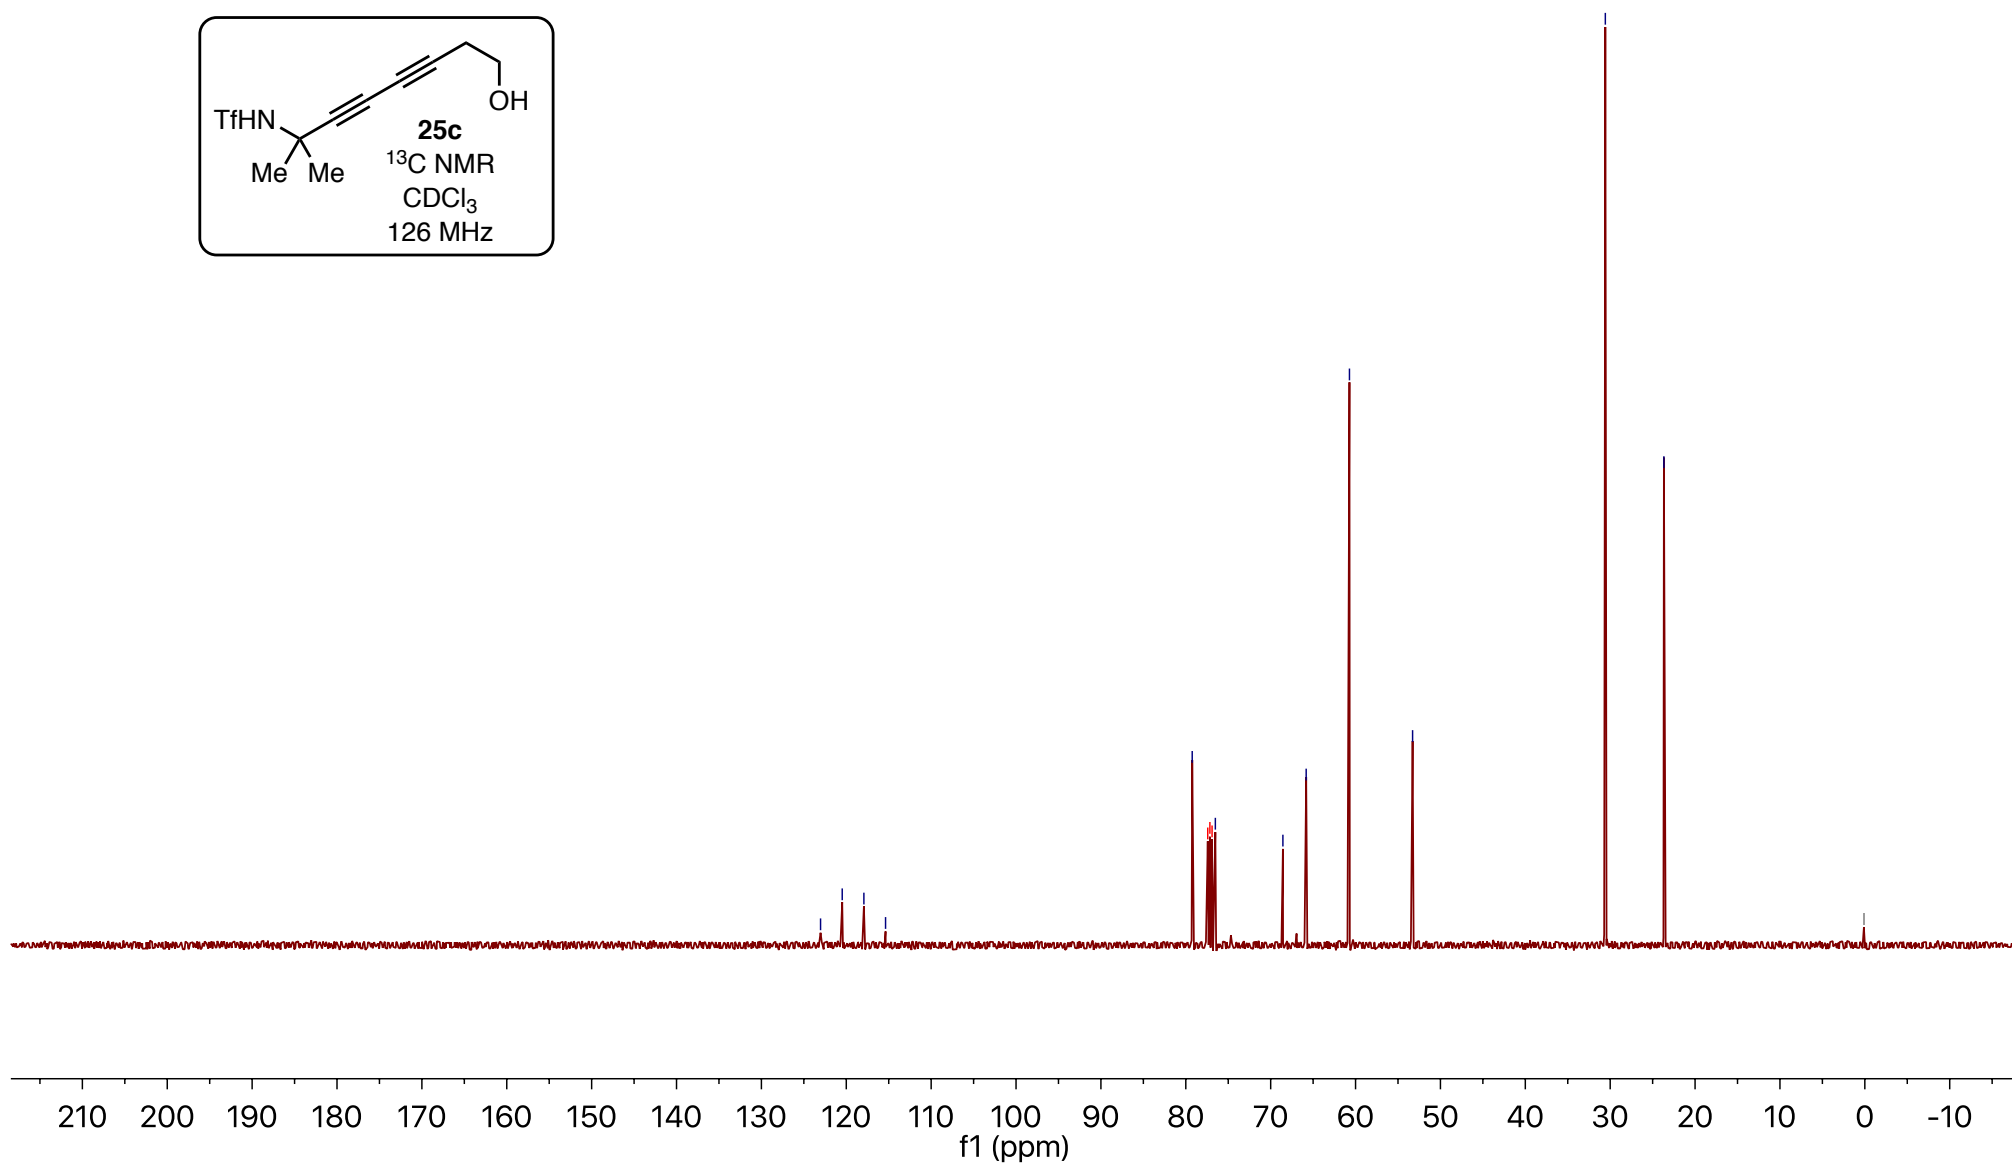

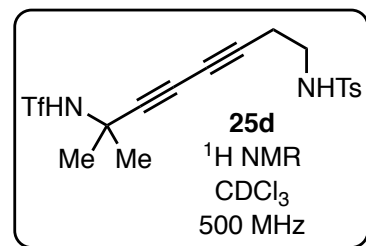

7.76  
7.75  
7.34  
7.32  
7.26 CDCl<sub>3</sub>

5.24  
4.84  
4.83  
4.82

4.11 EtOAc

3.15  
3.13  
3.12  
3.11

2.48  
2.47  
2.45  
2.44

2.05 EtOAc

1.70  
1.60 H<sub>2</sub>O

1.26 hexanes

0.88 hexanes

0.00

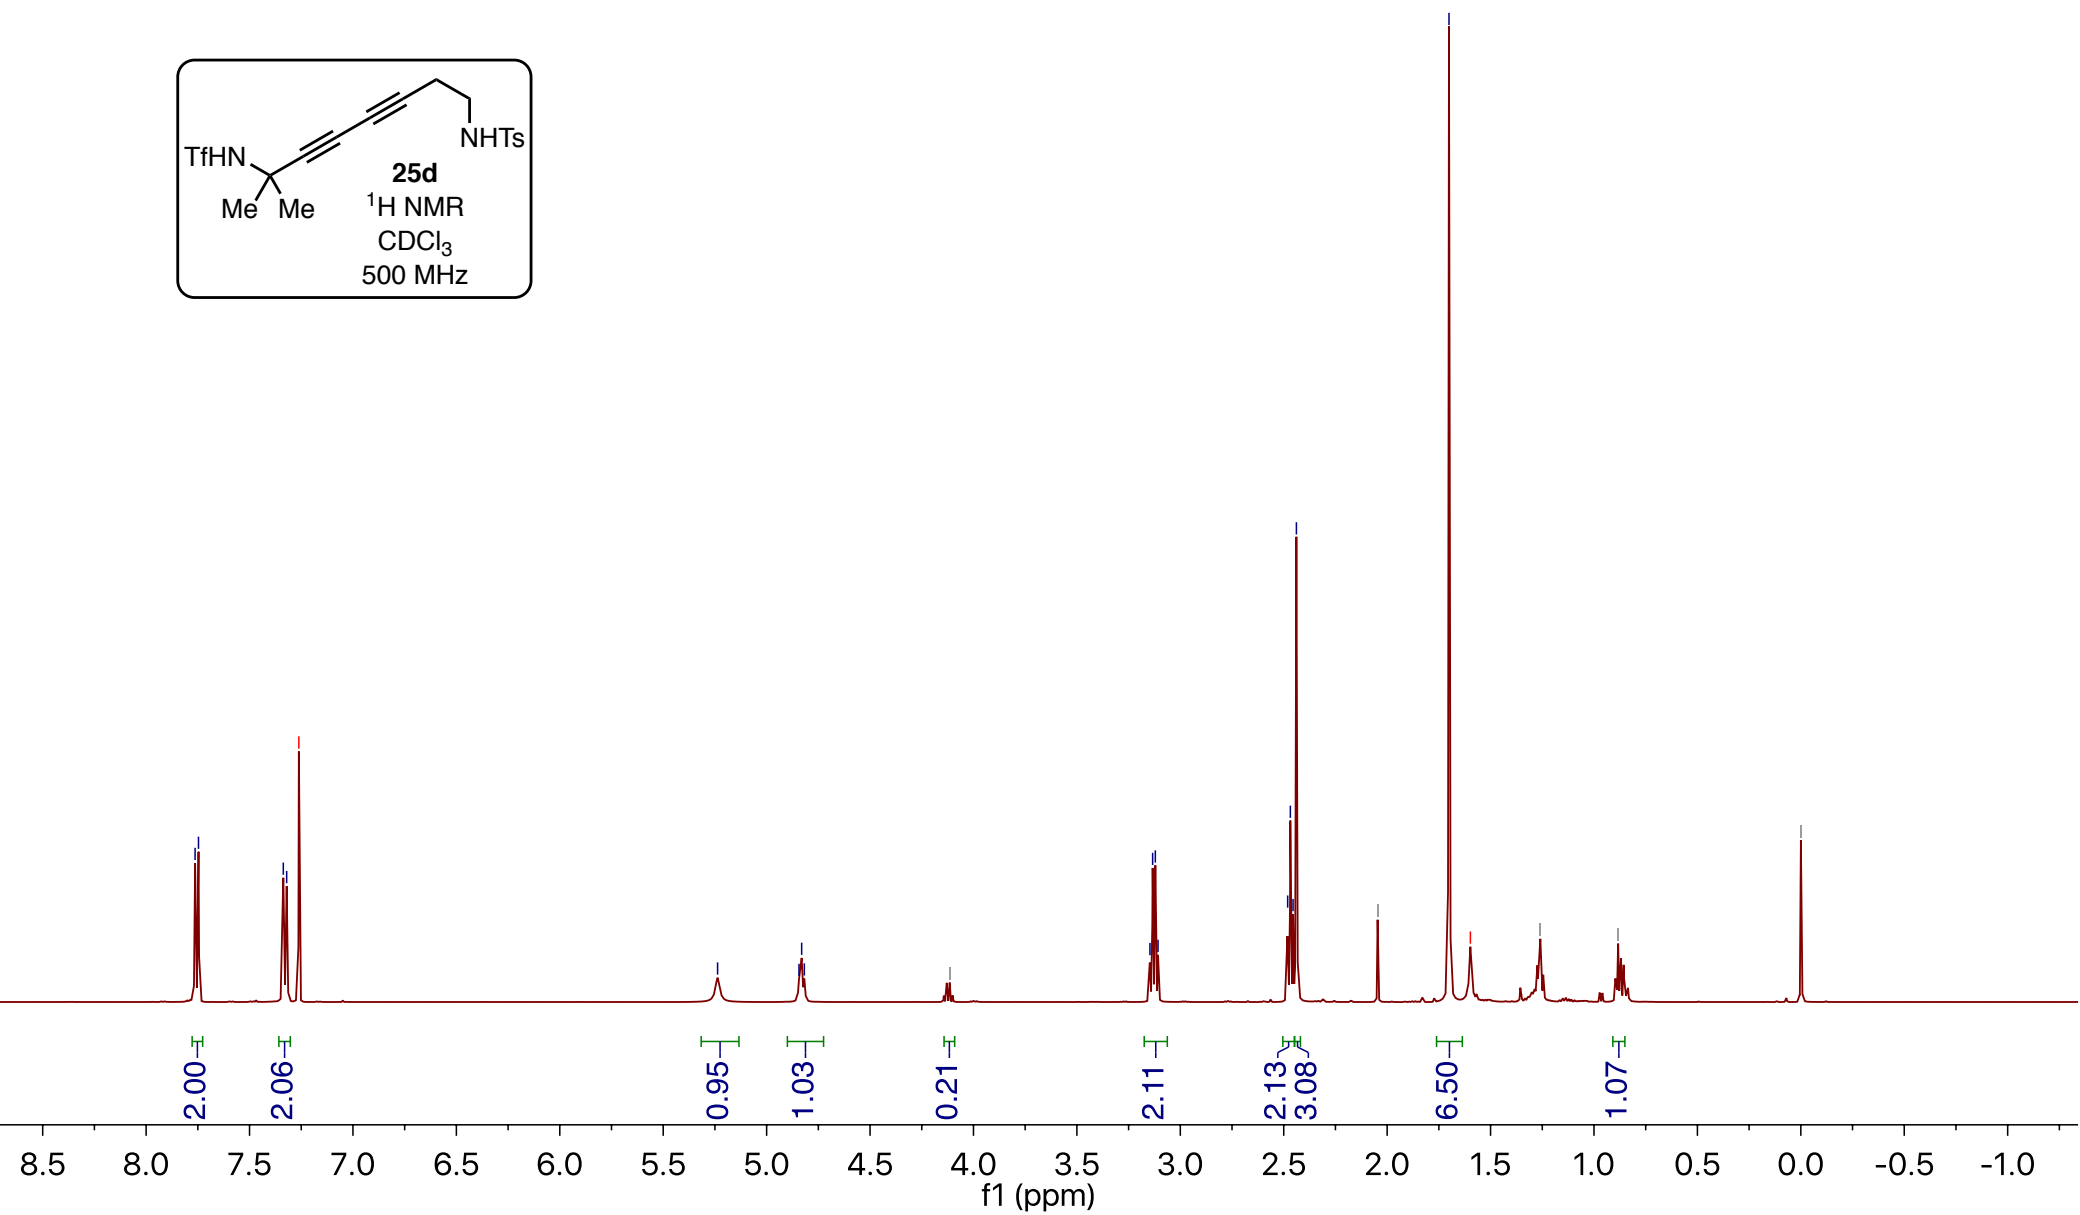

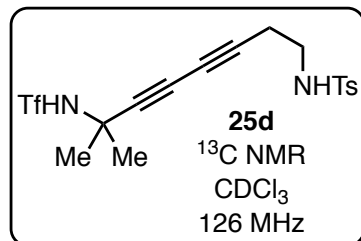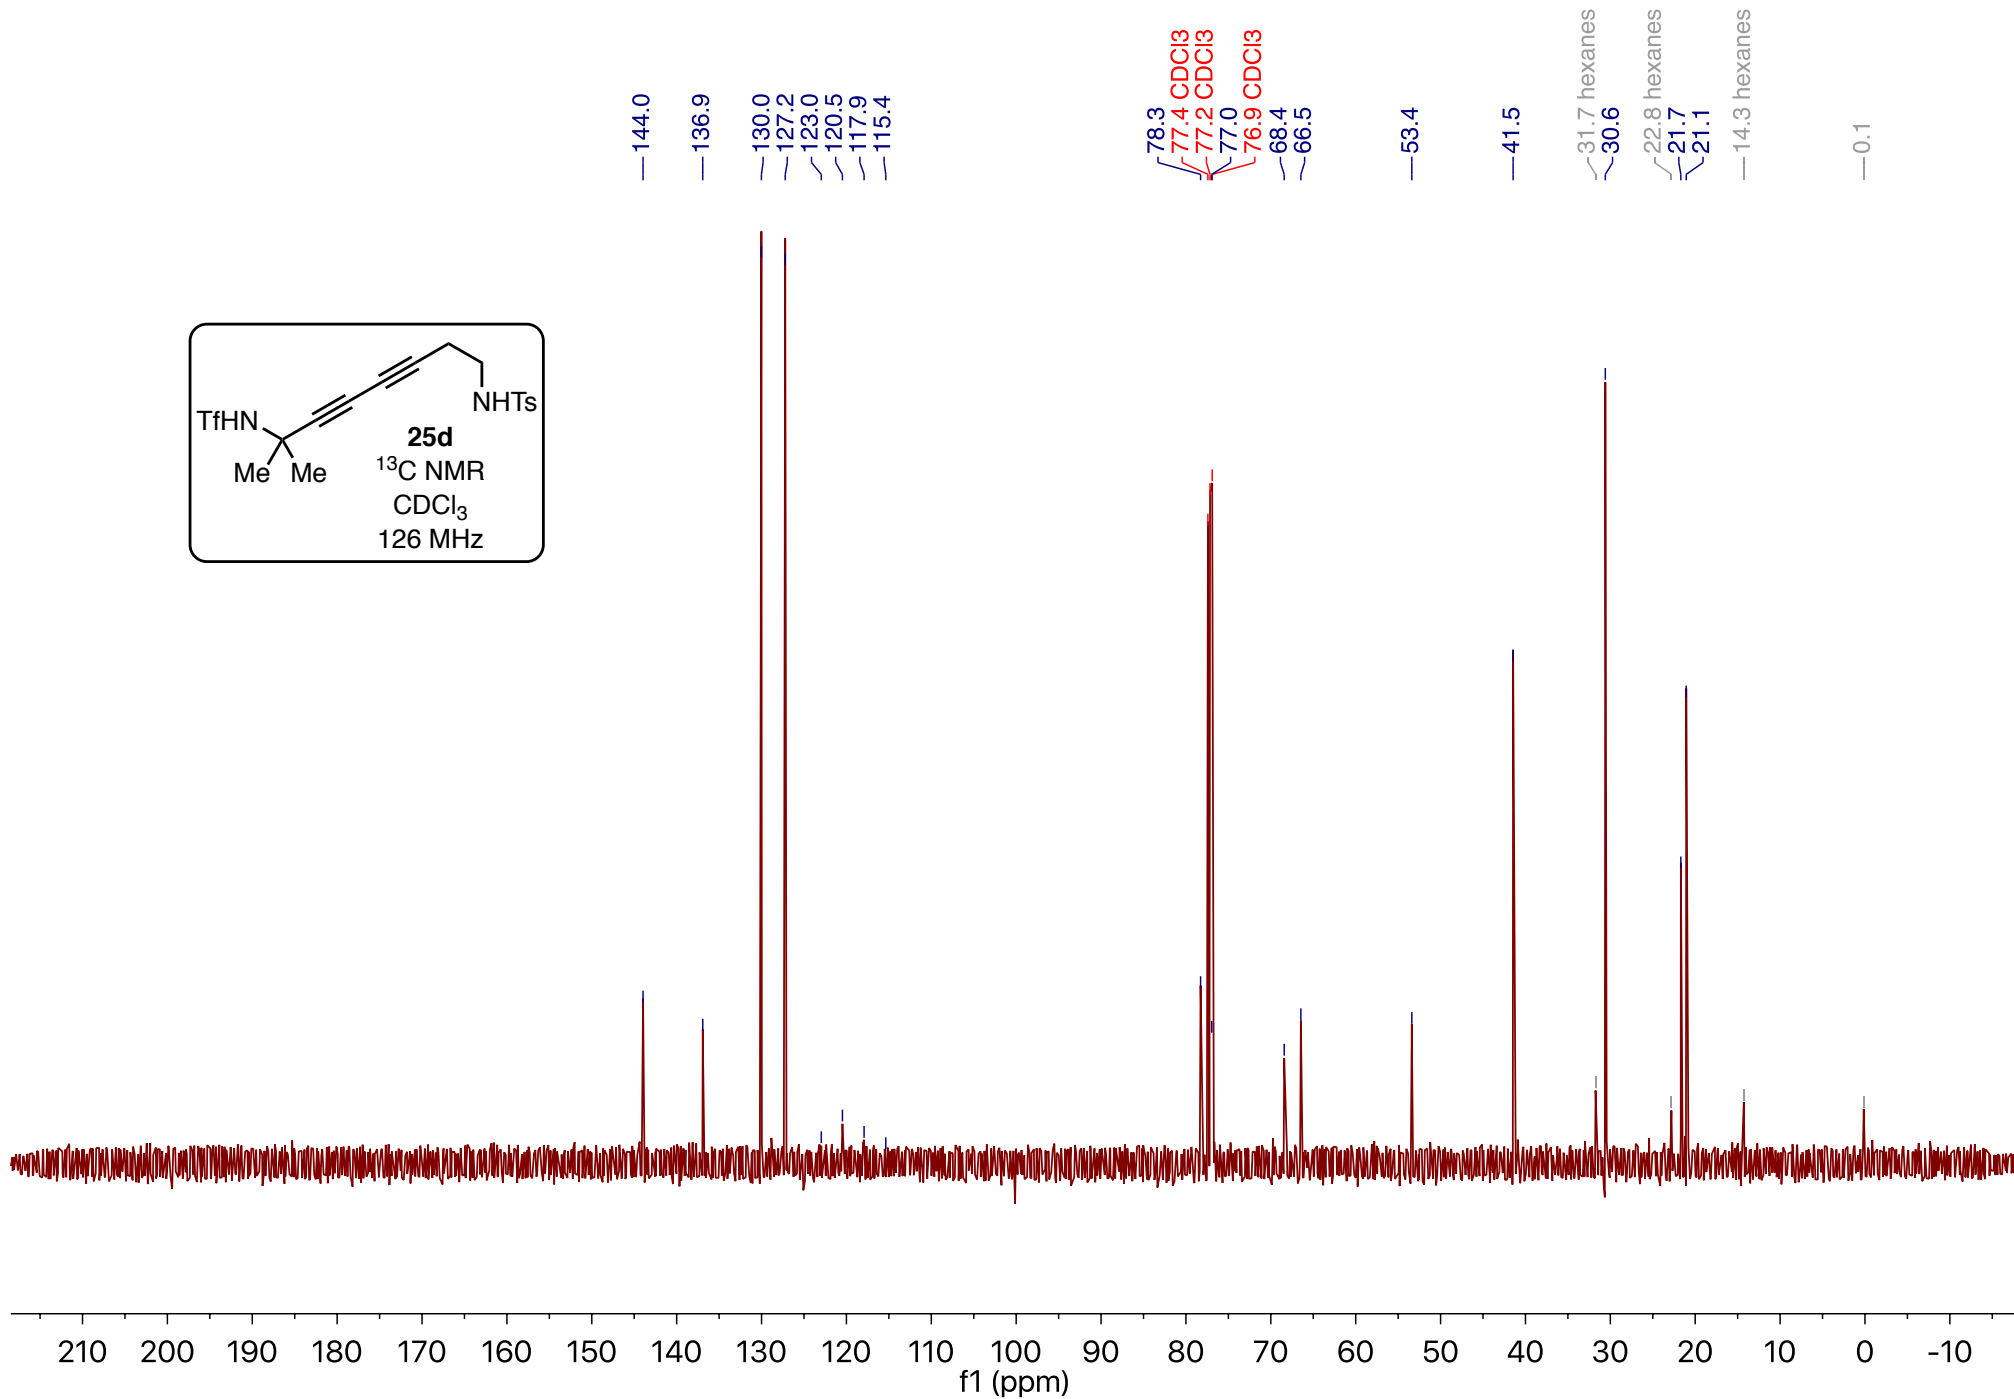

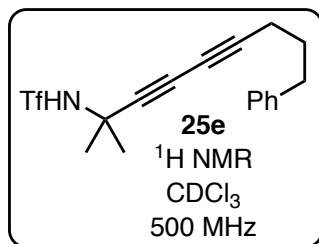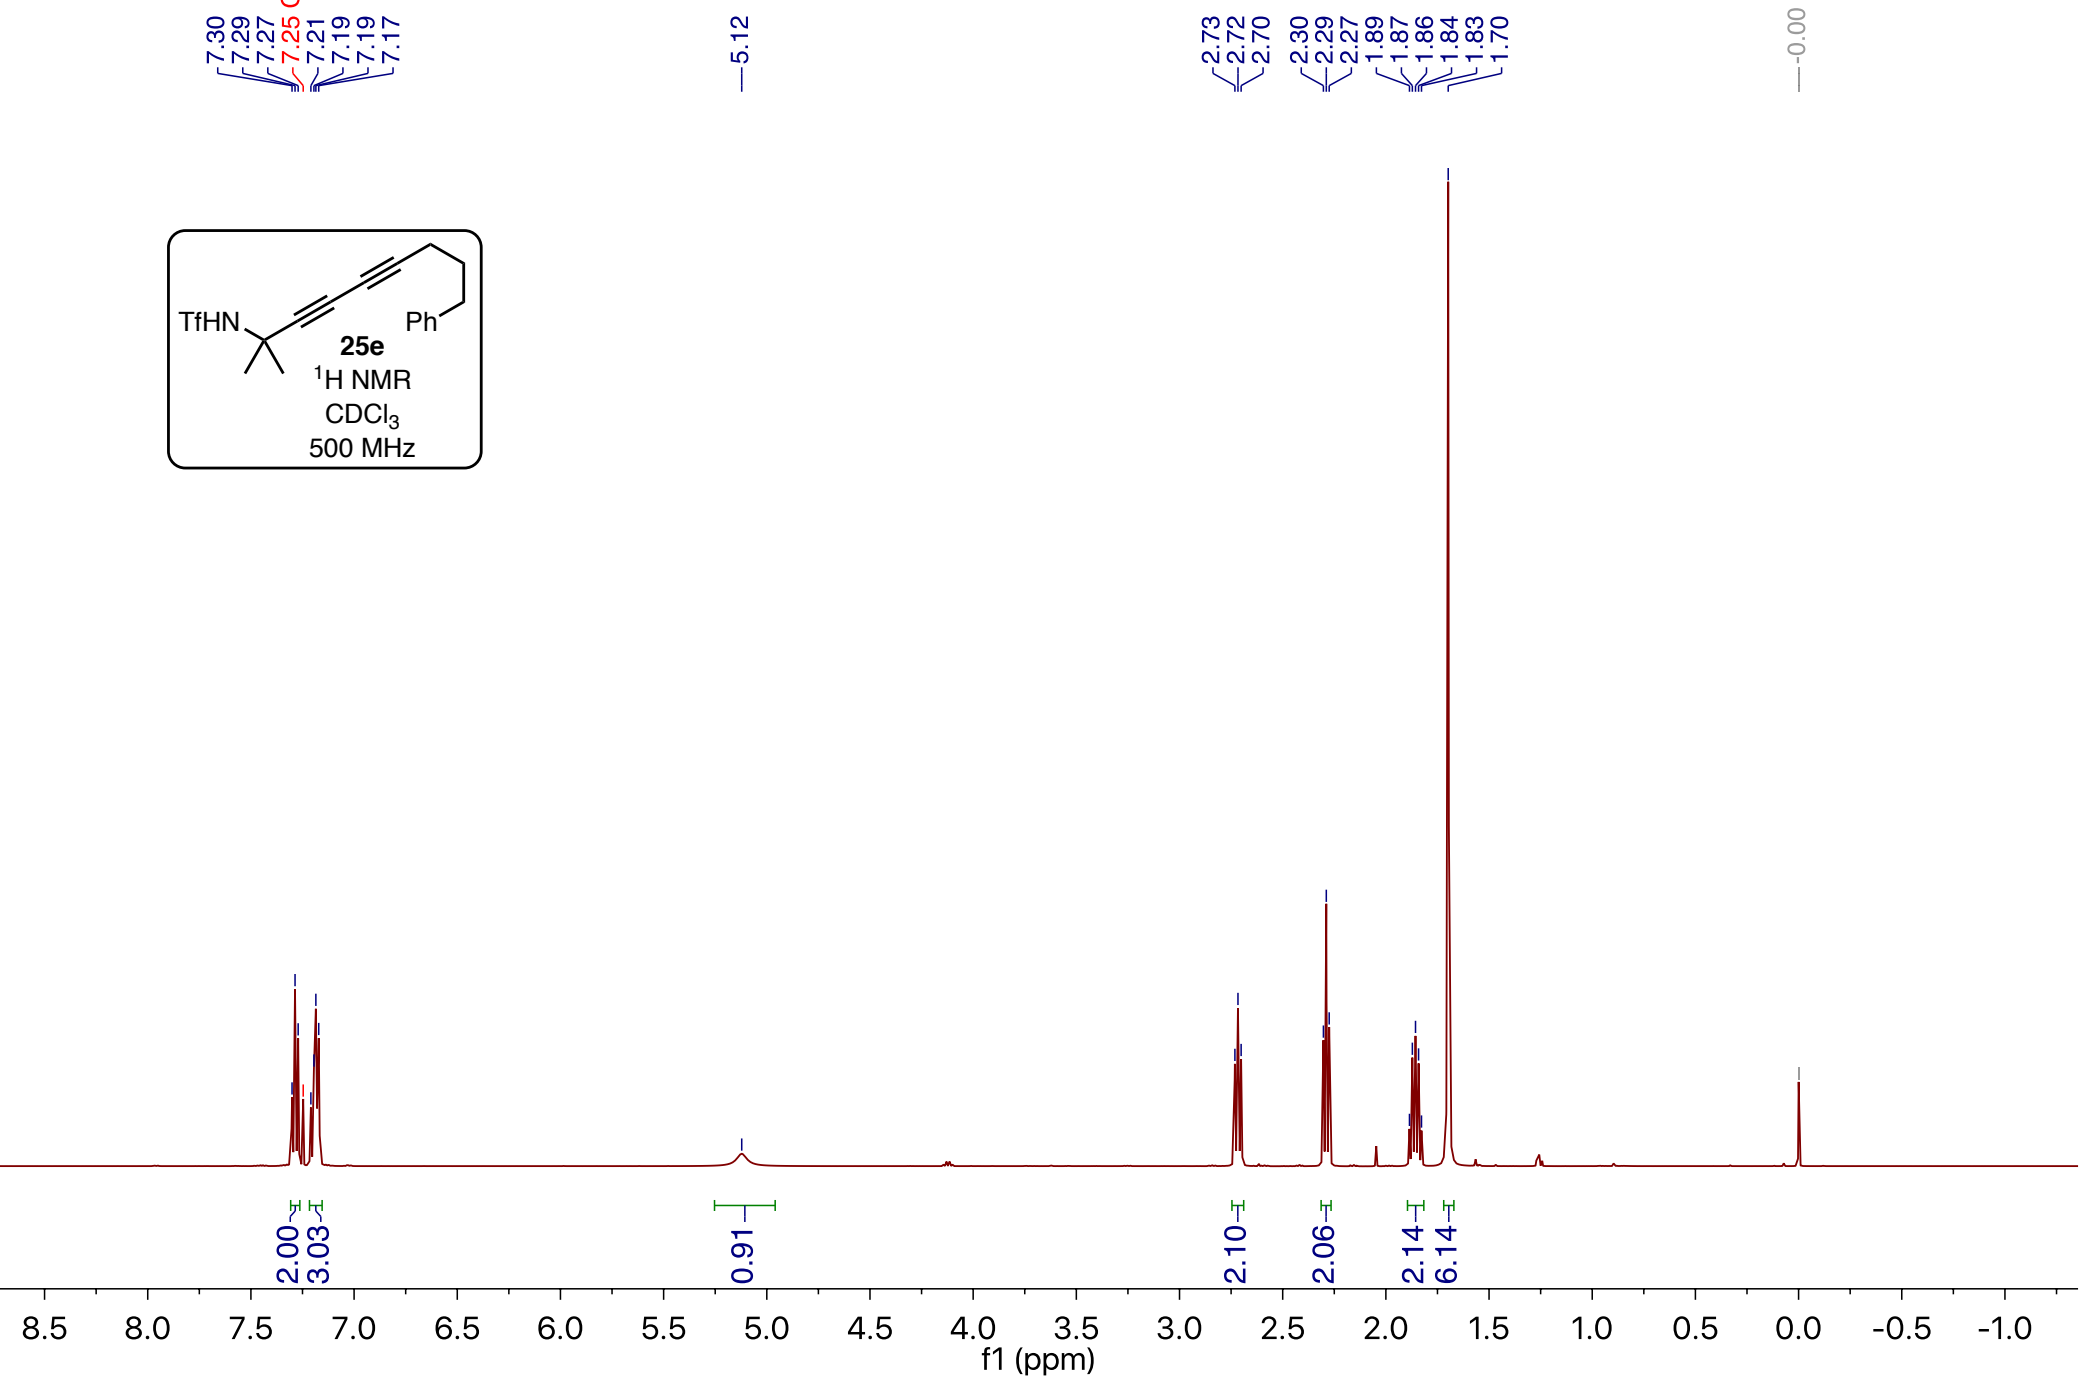

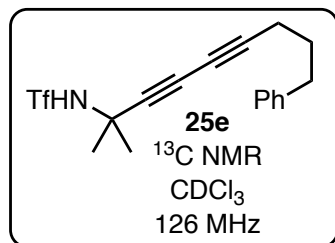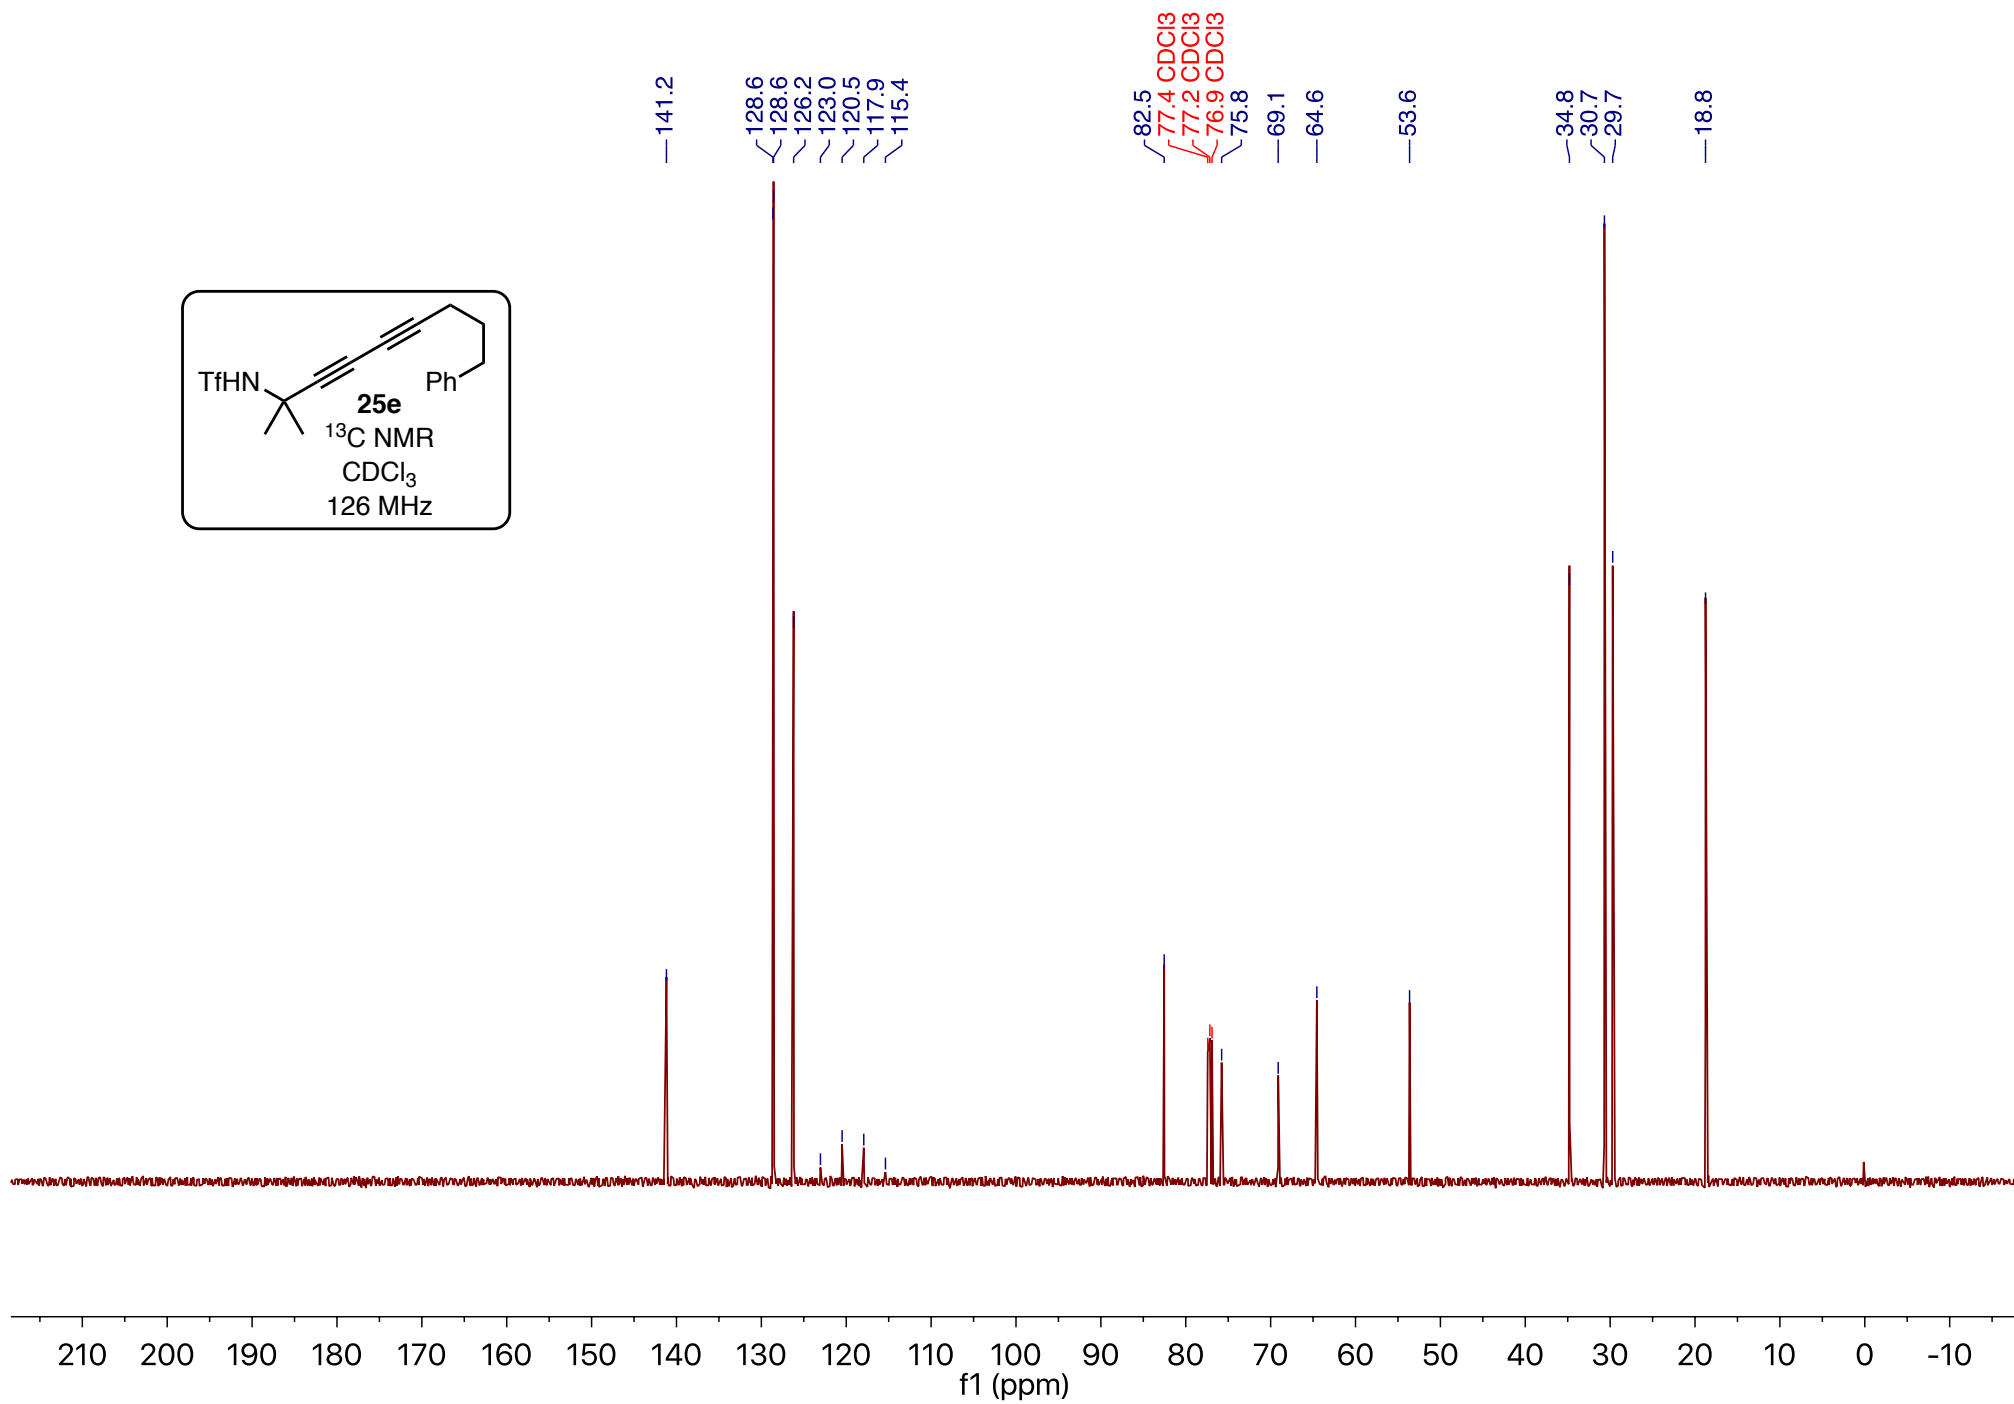

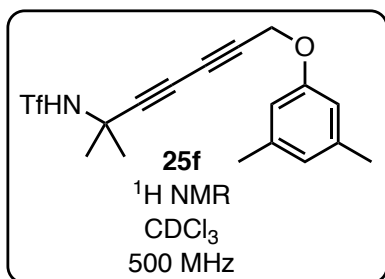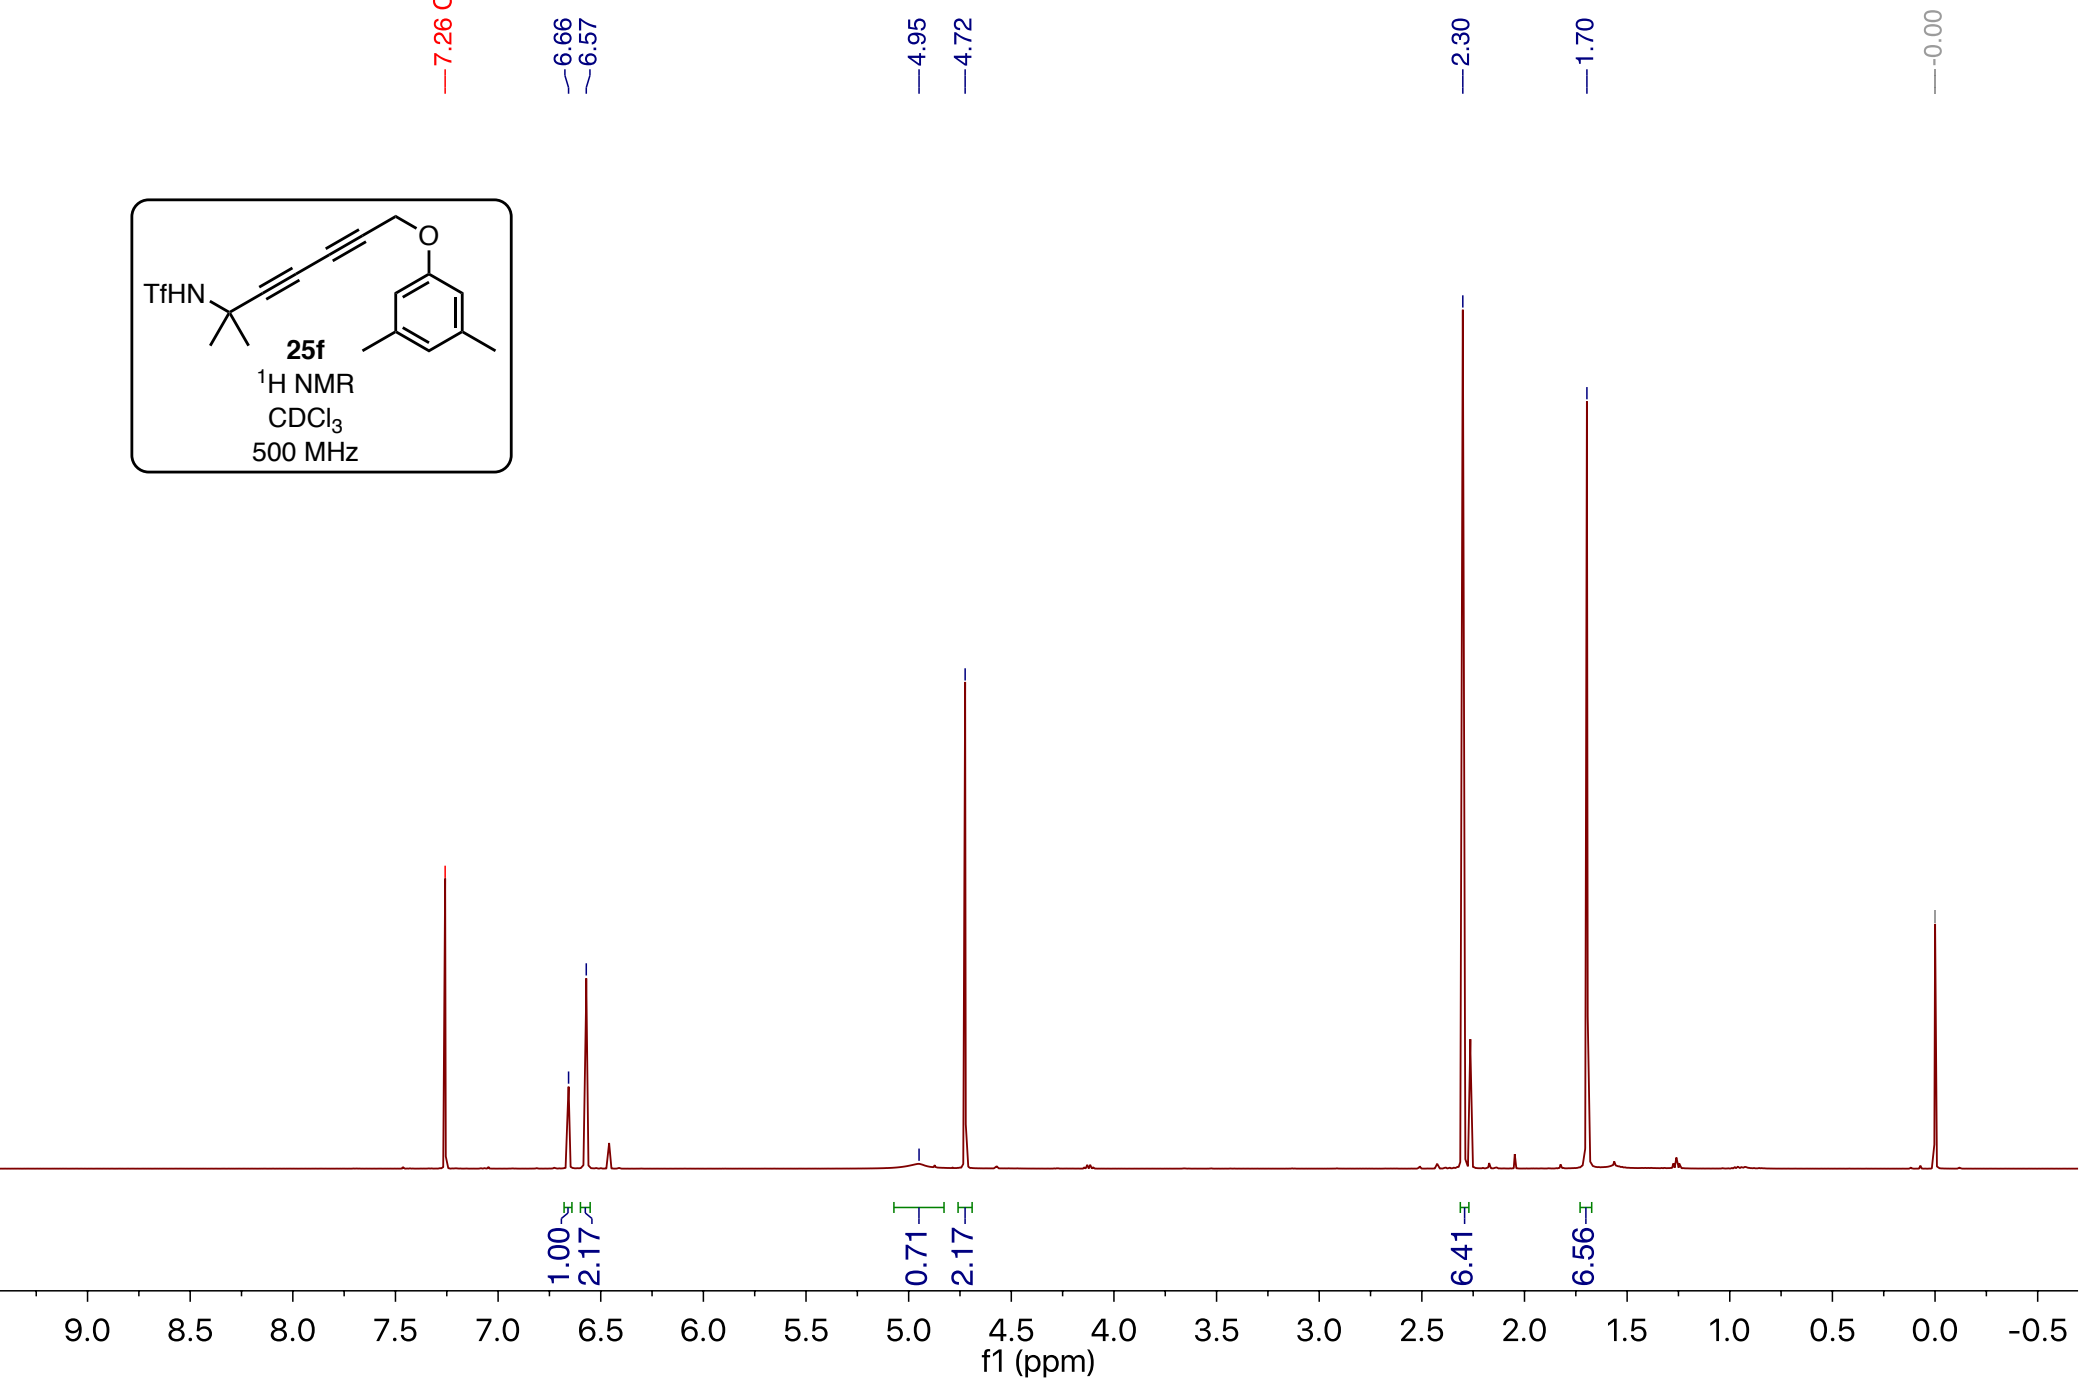



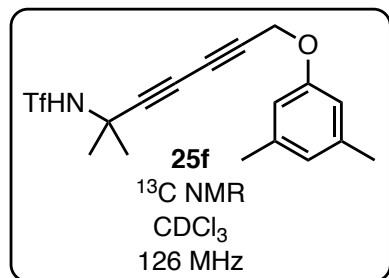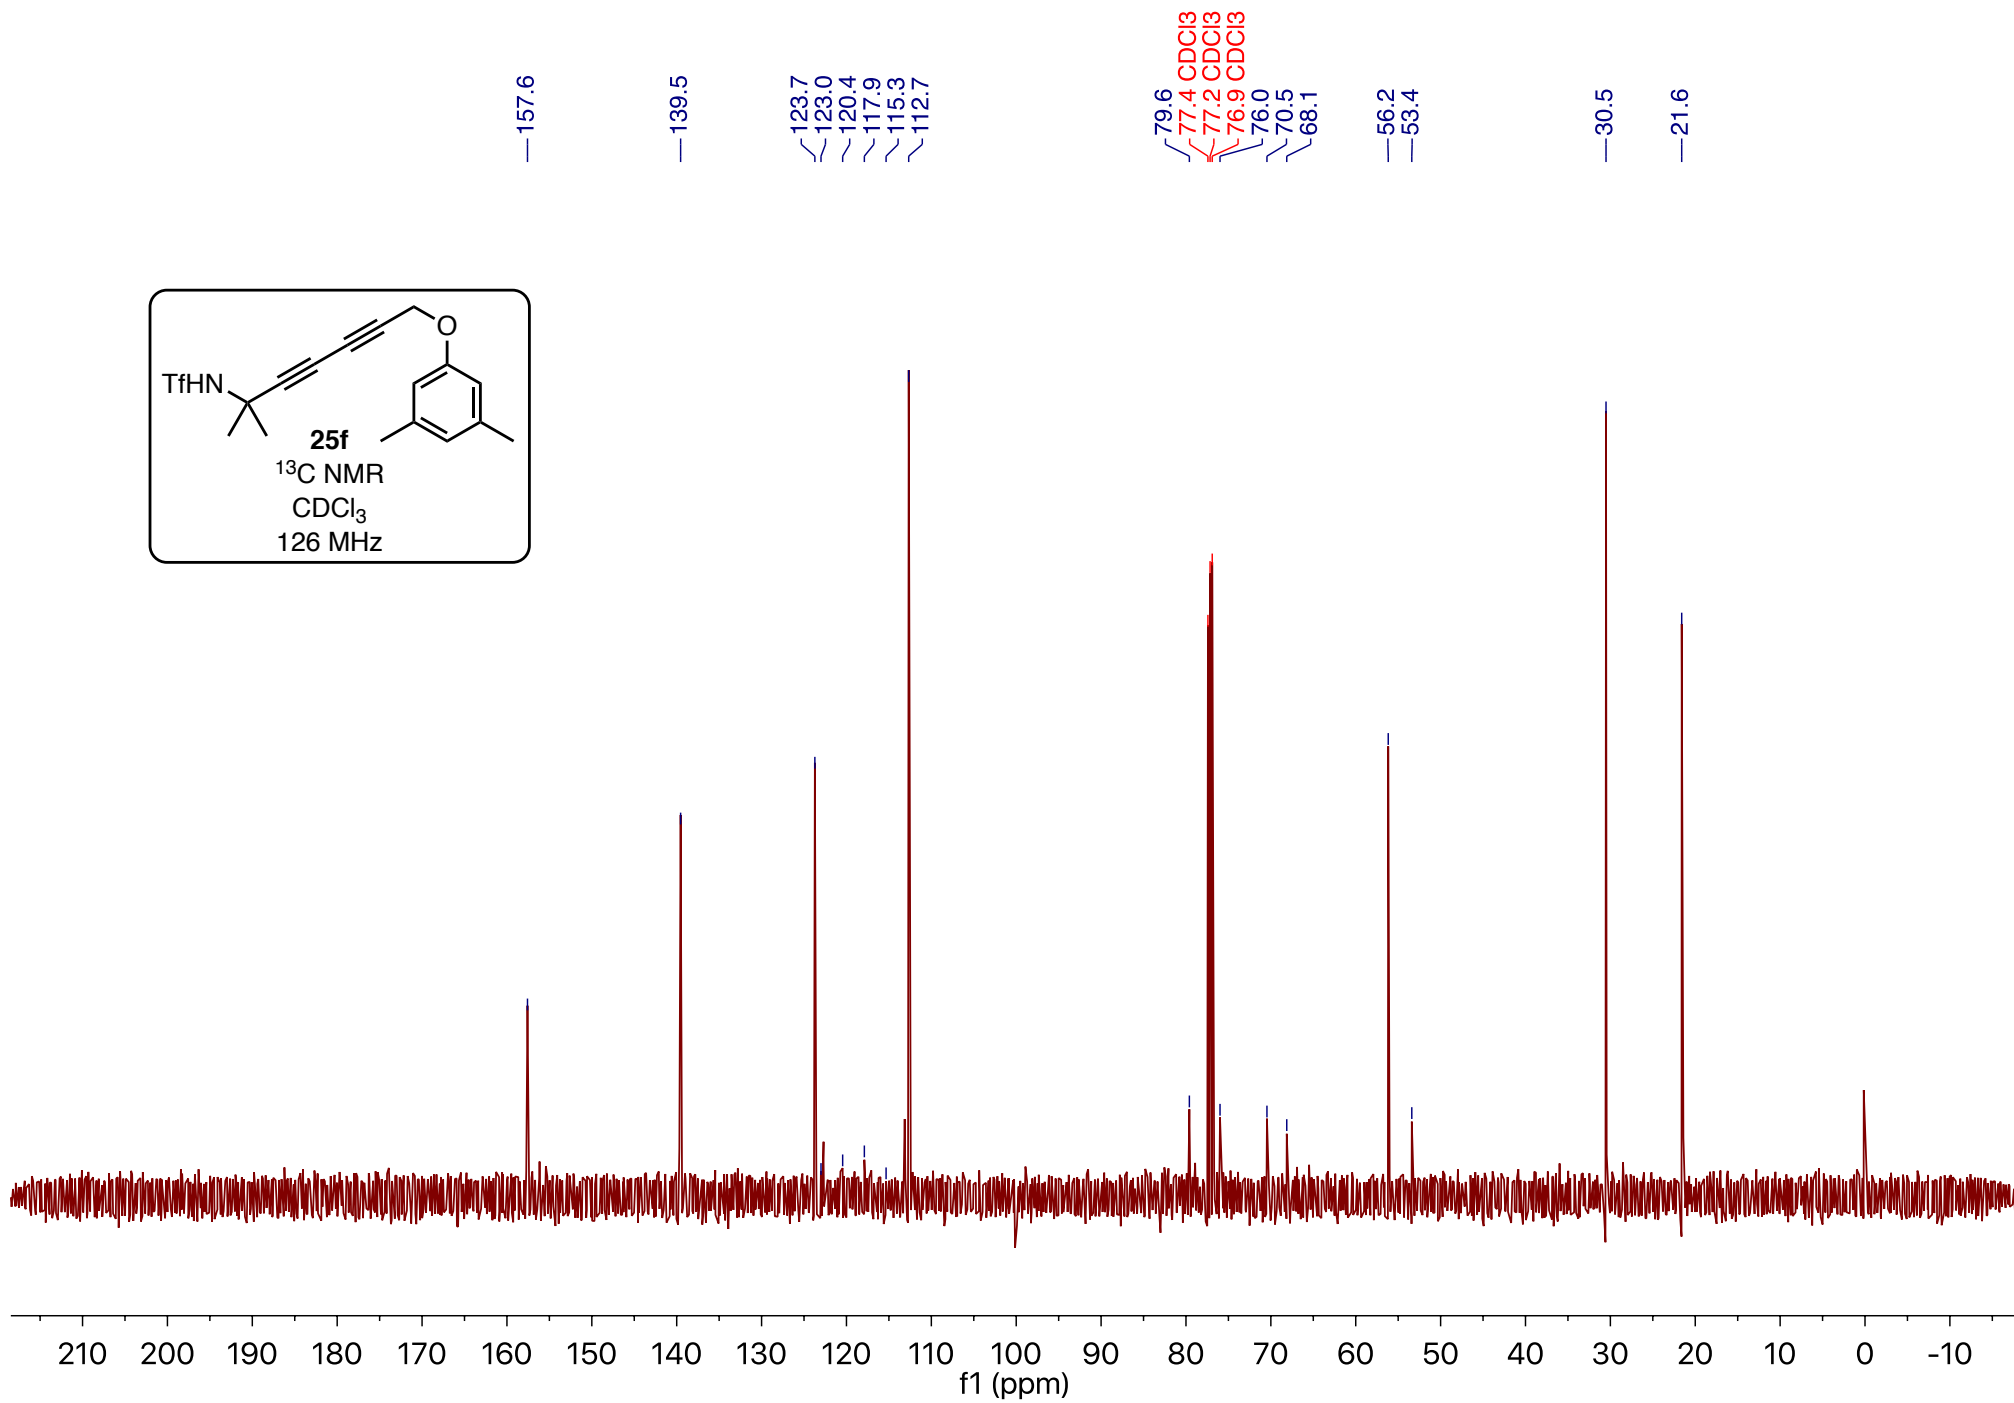

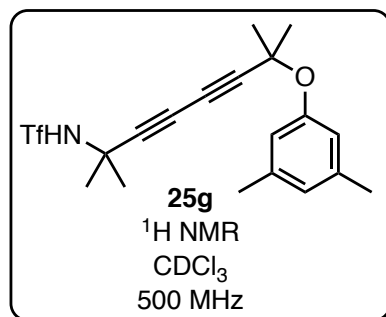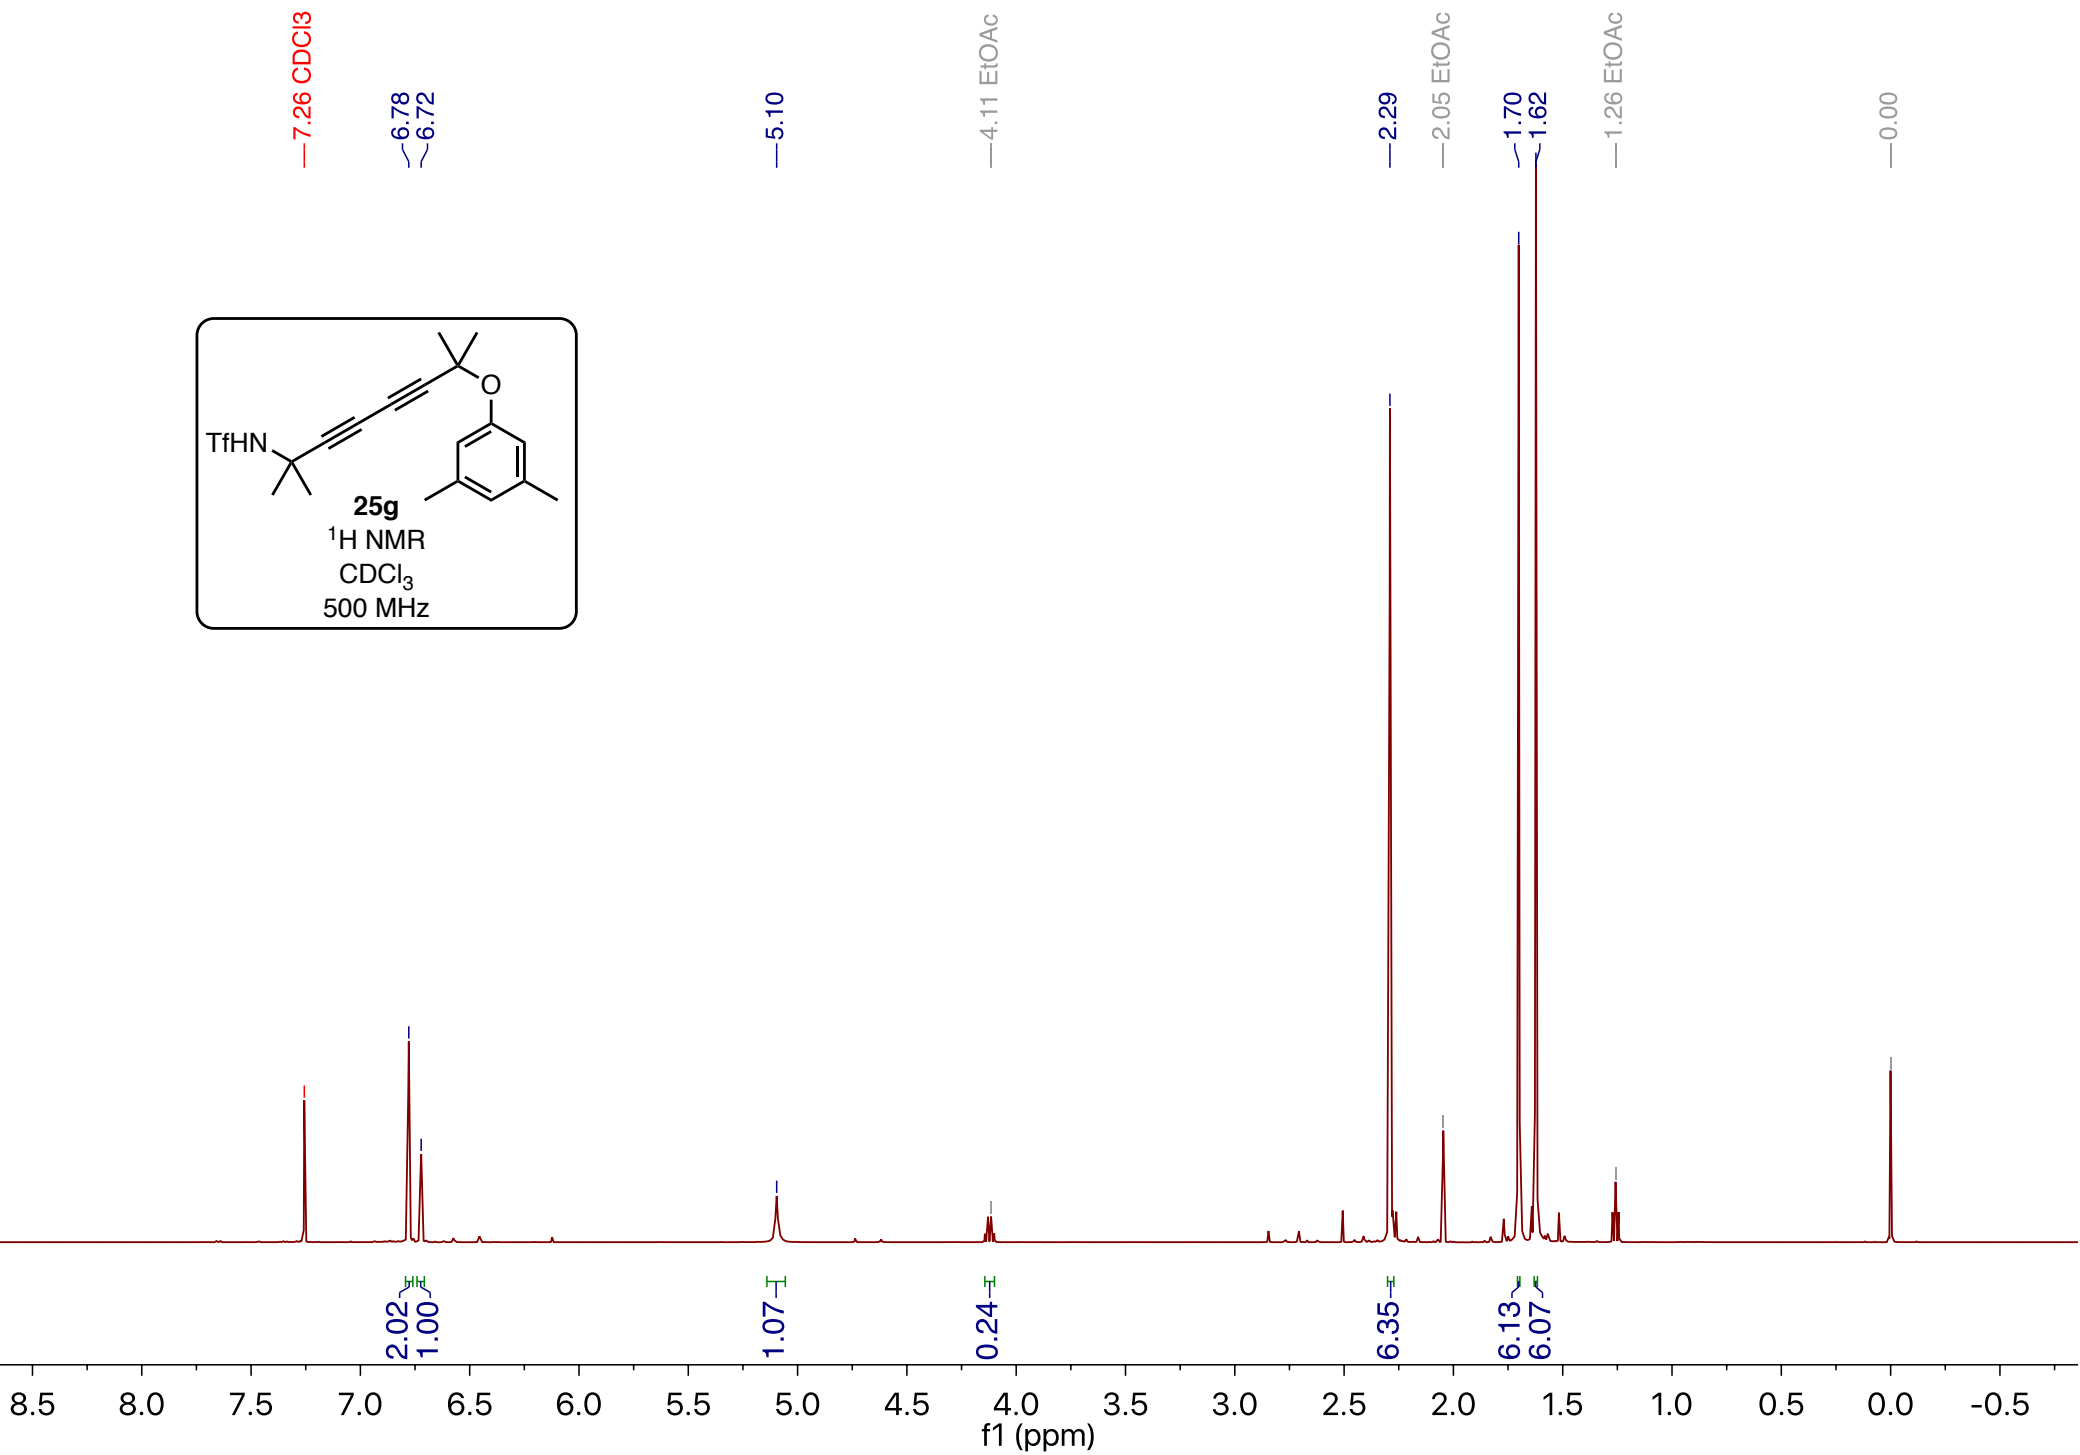

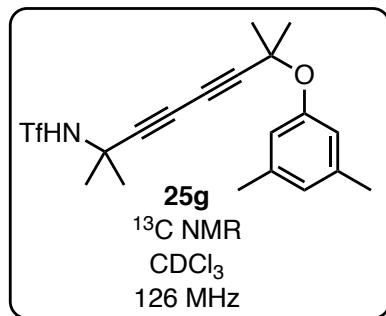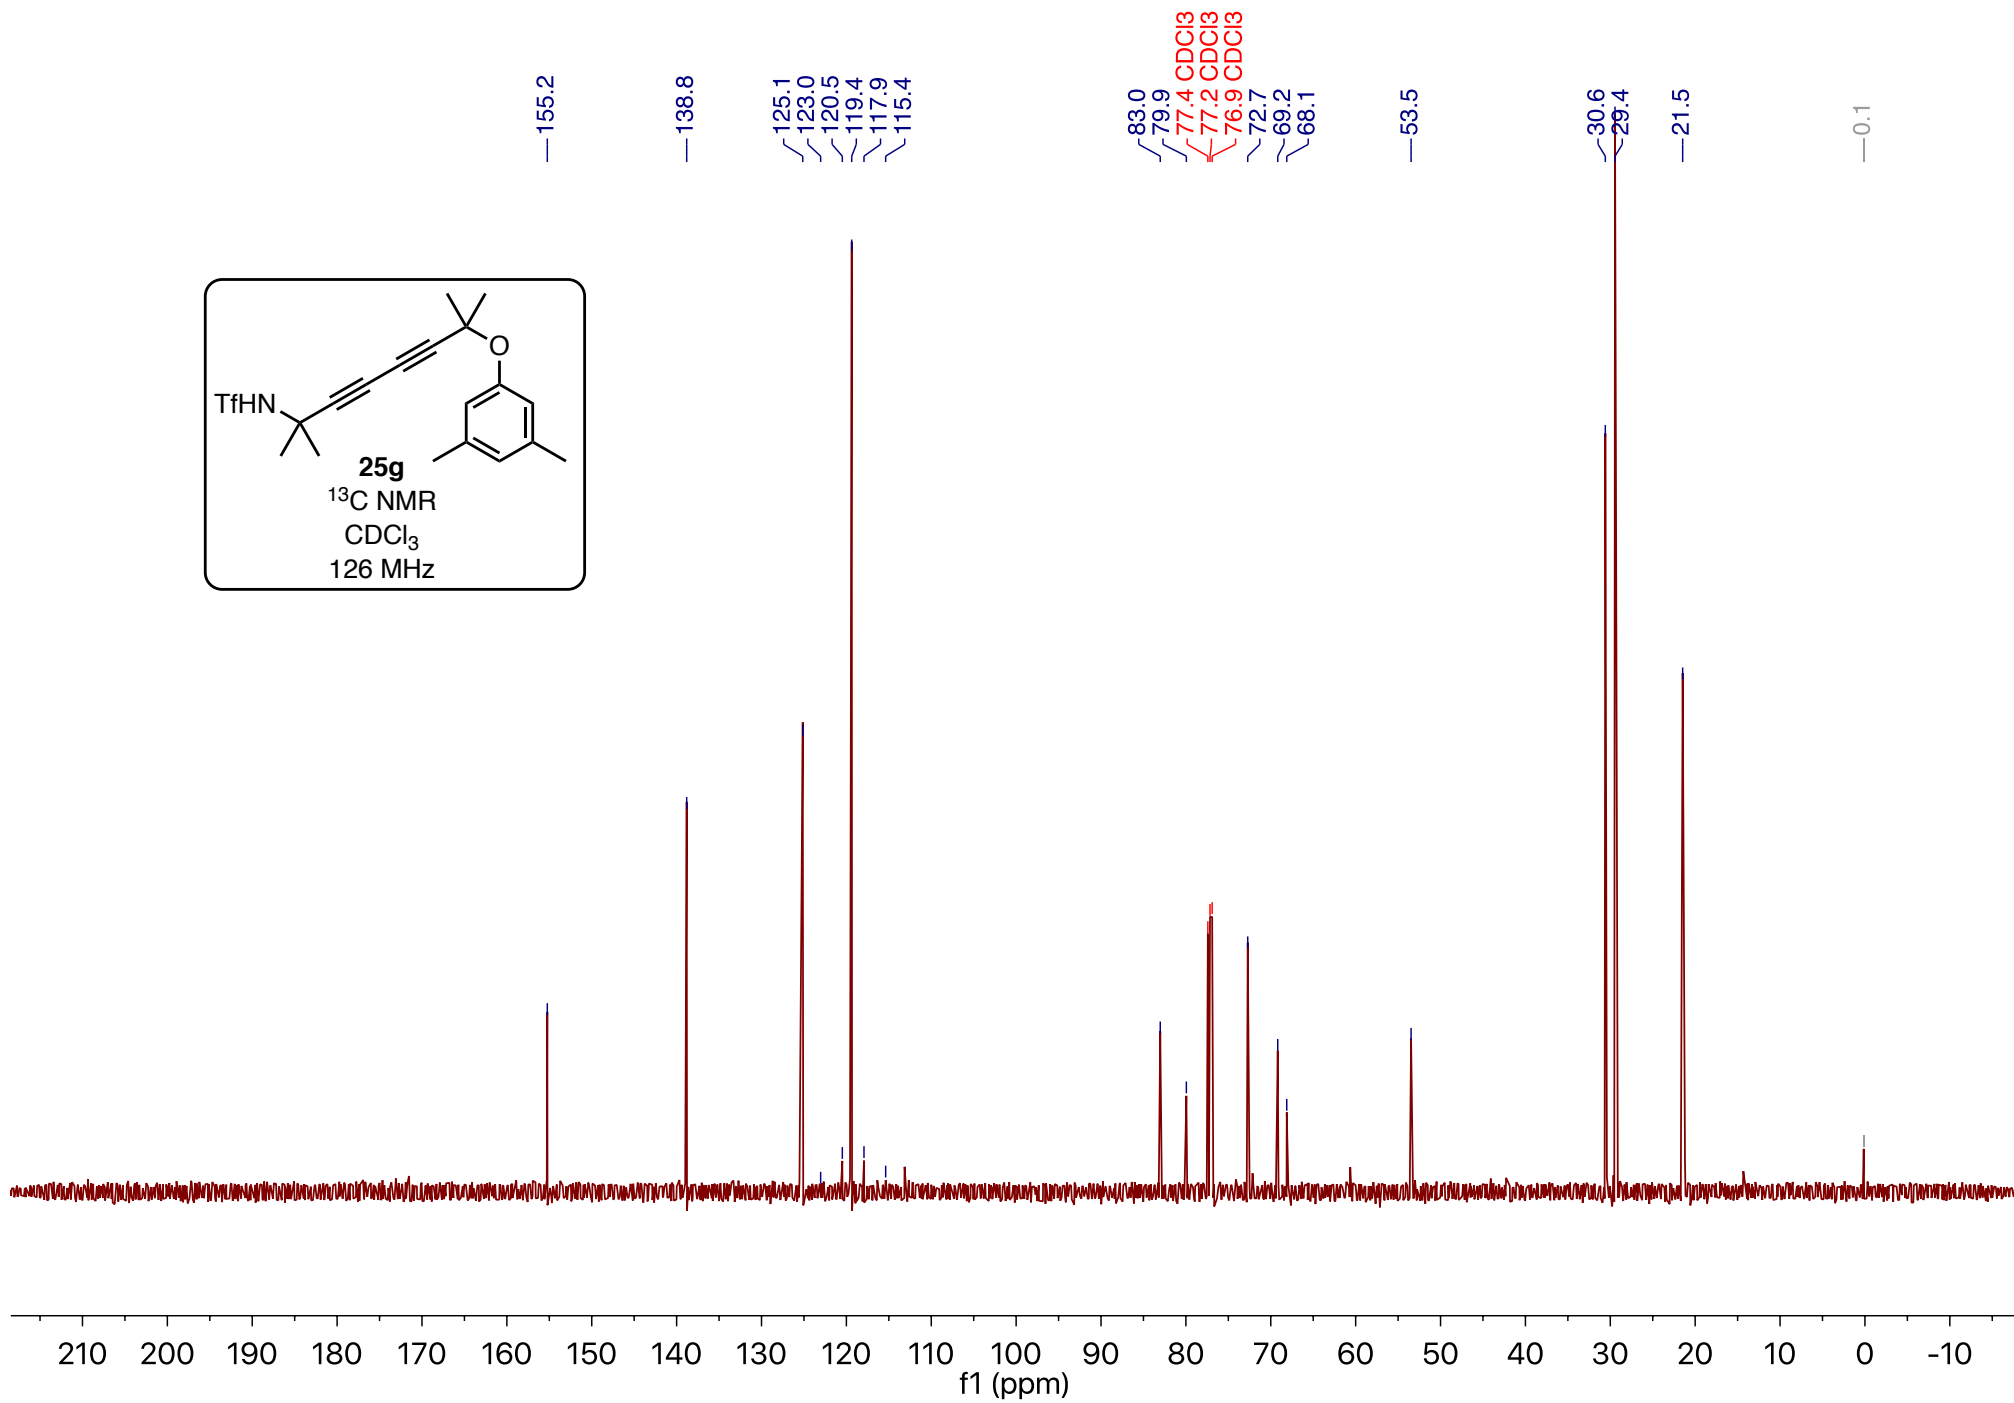

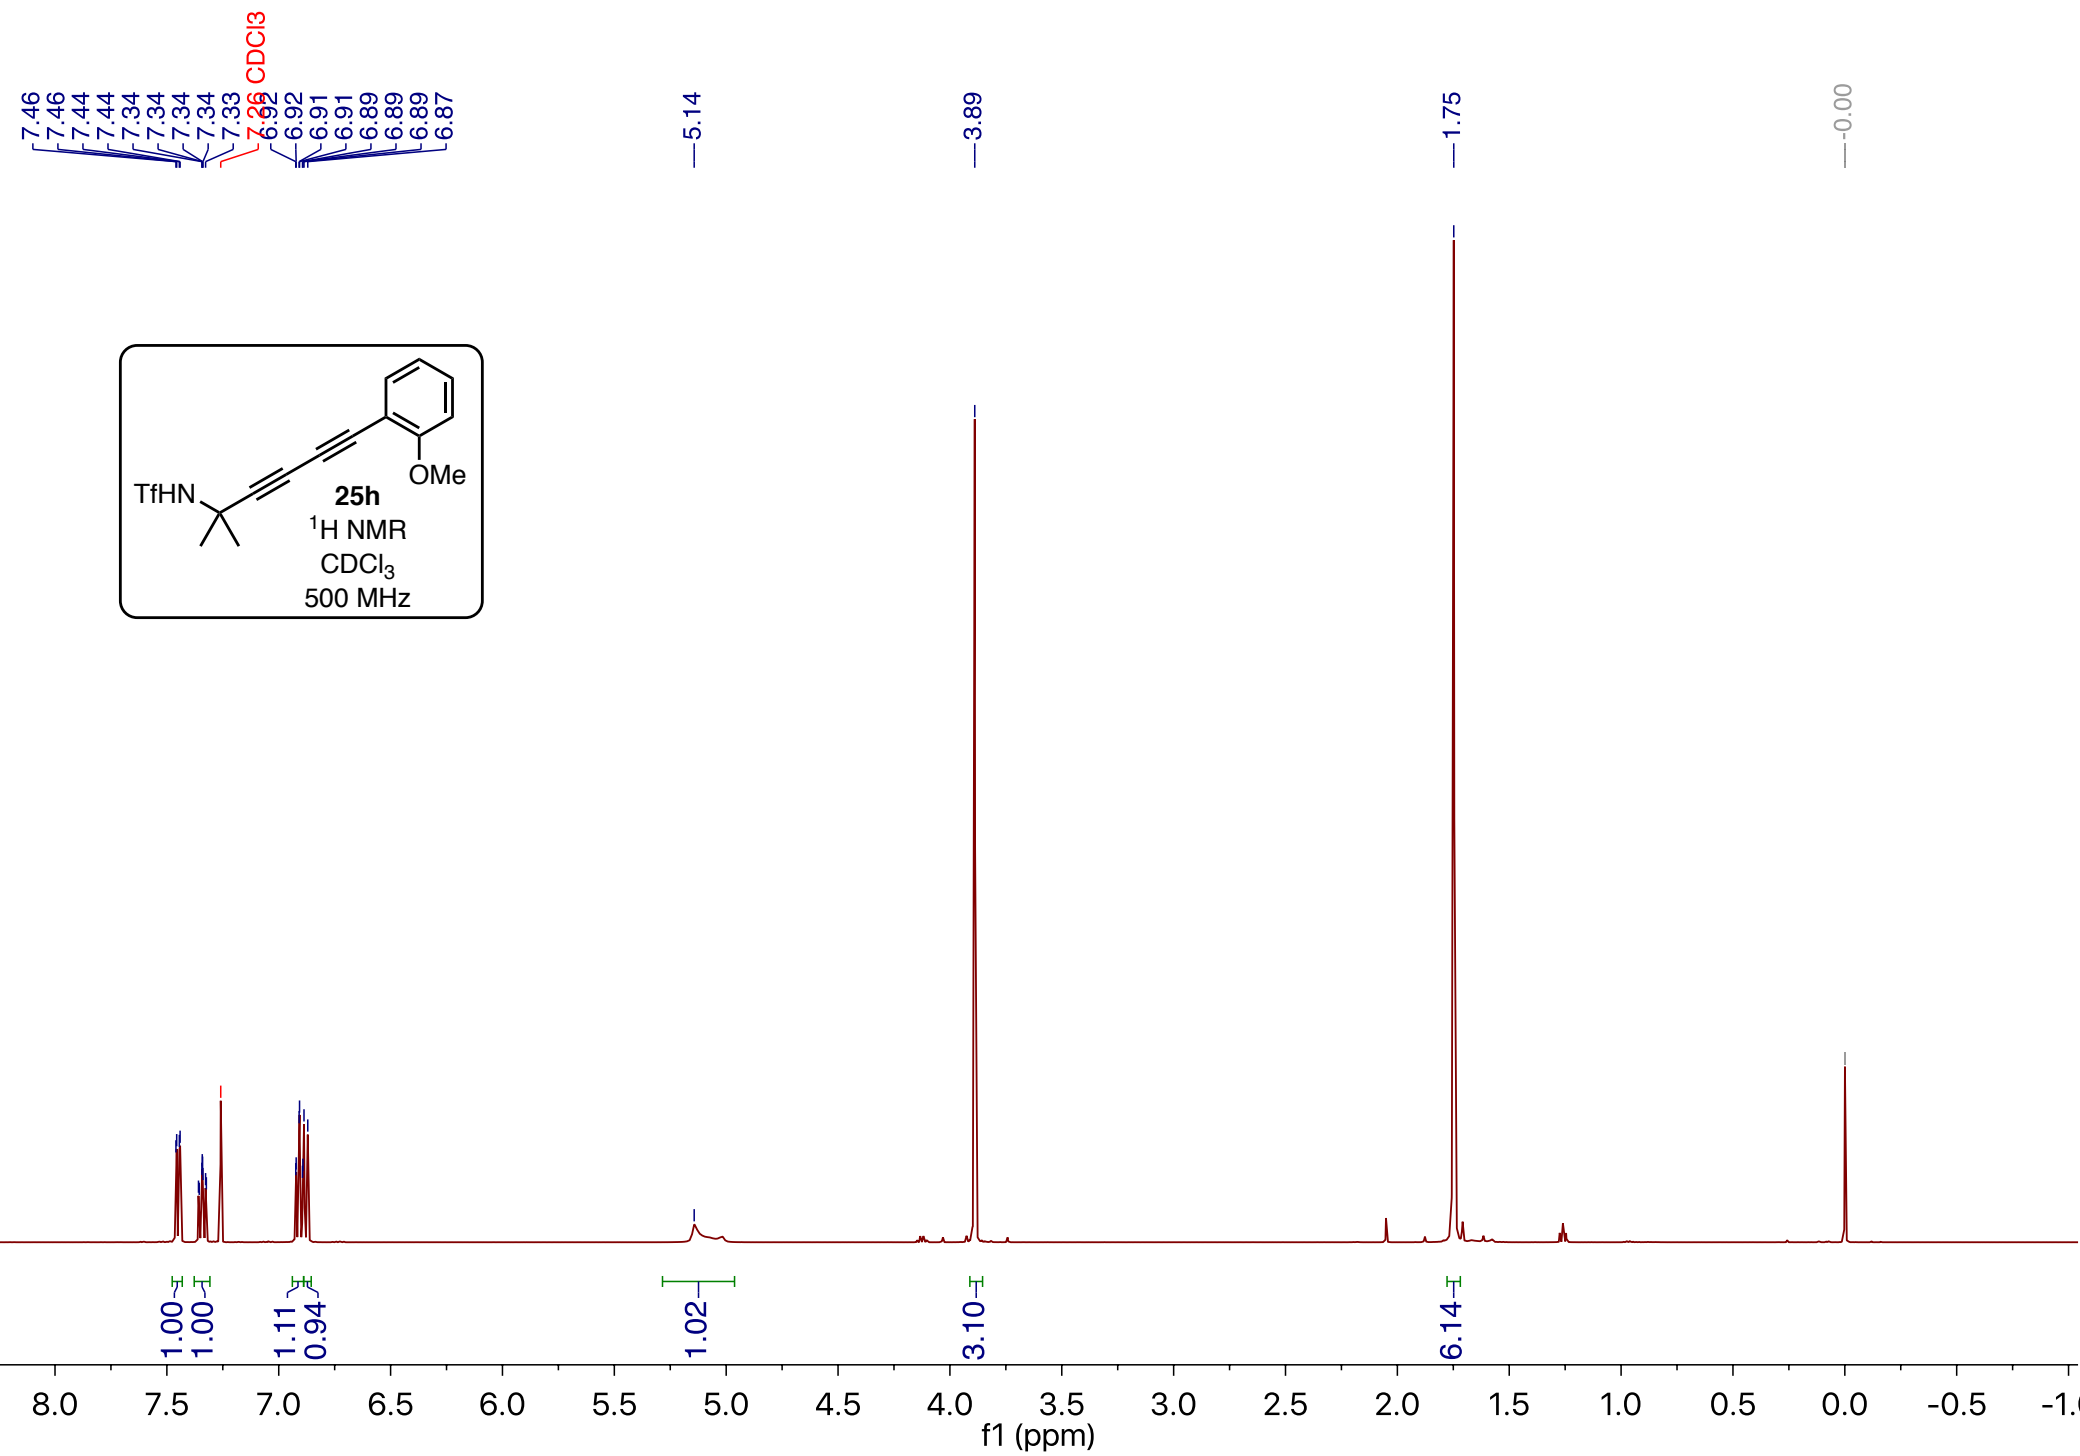

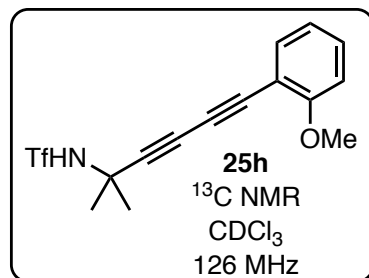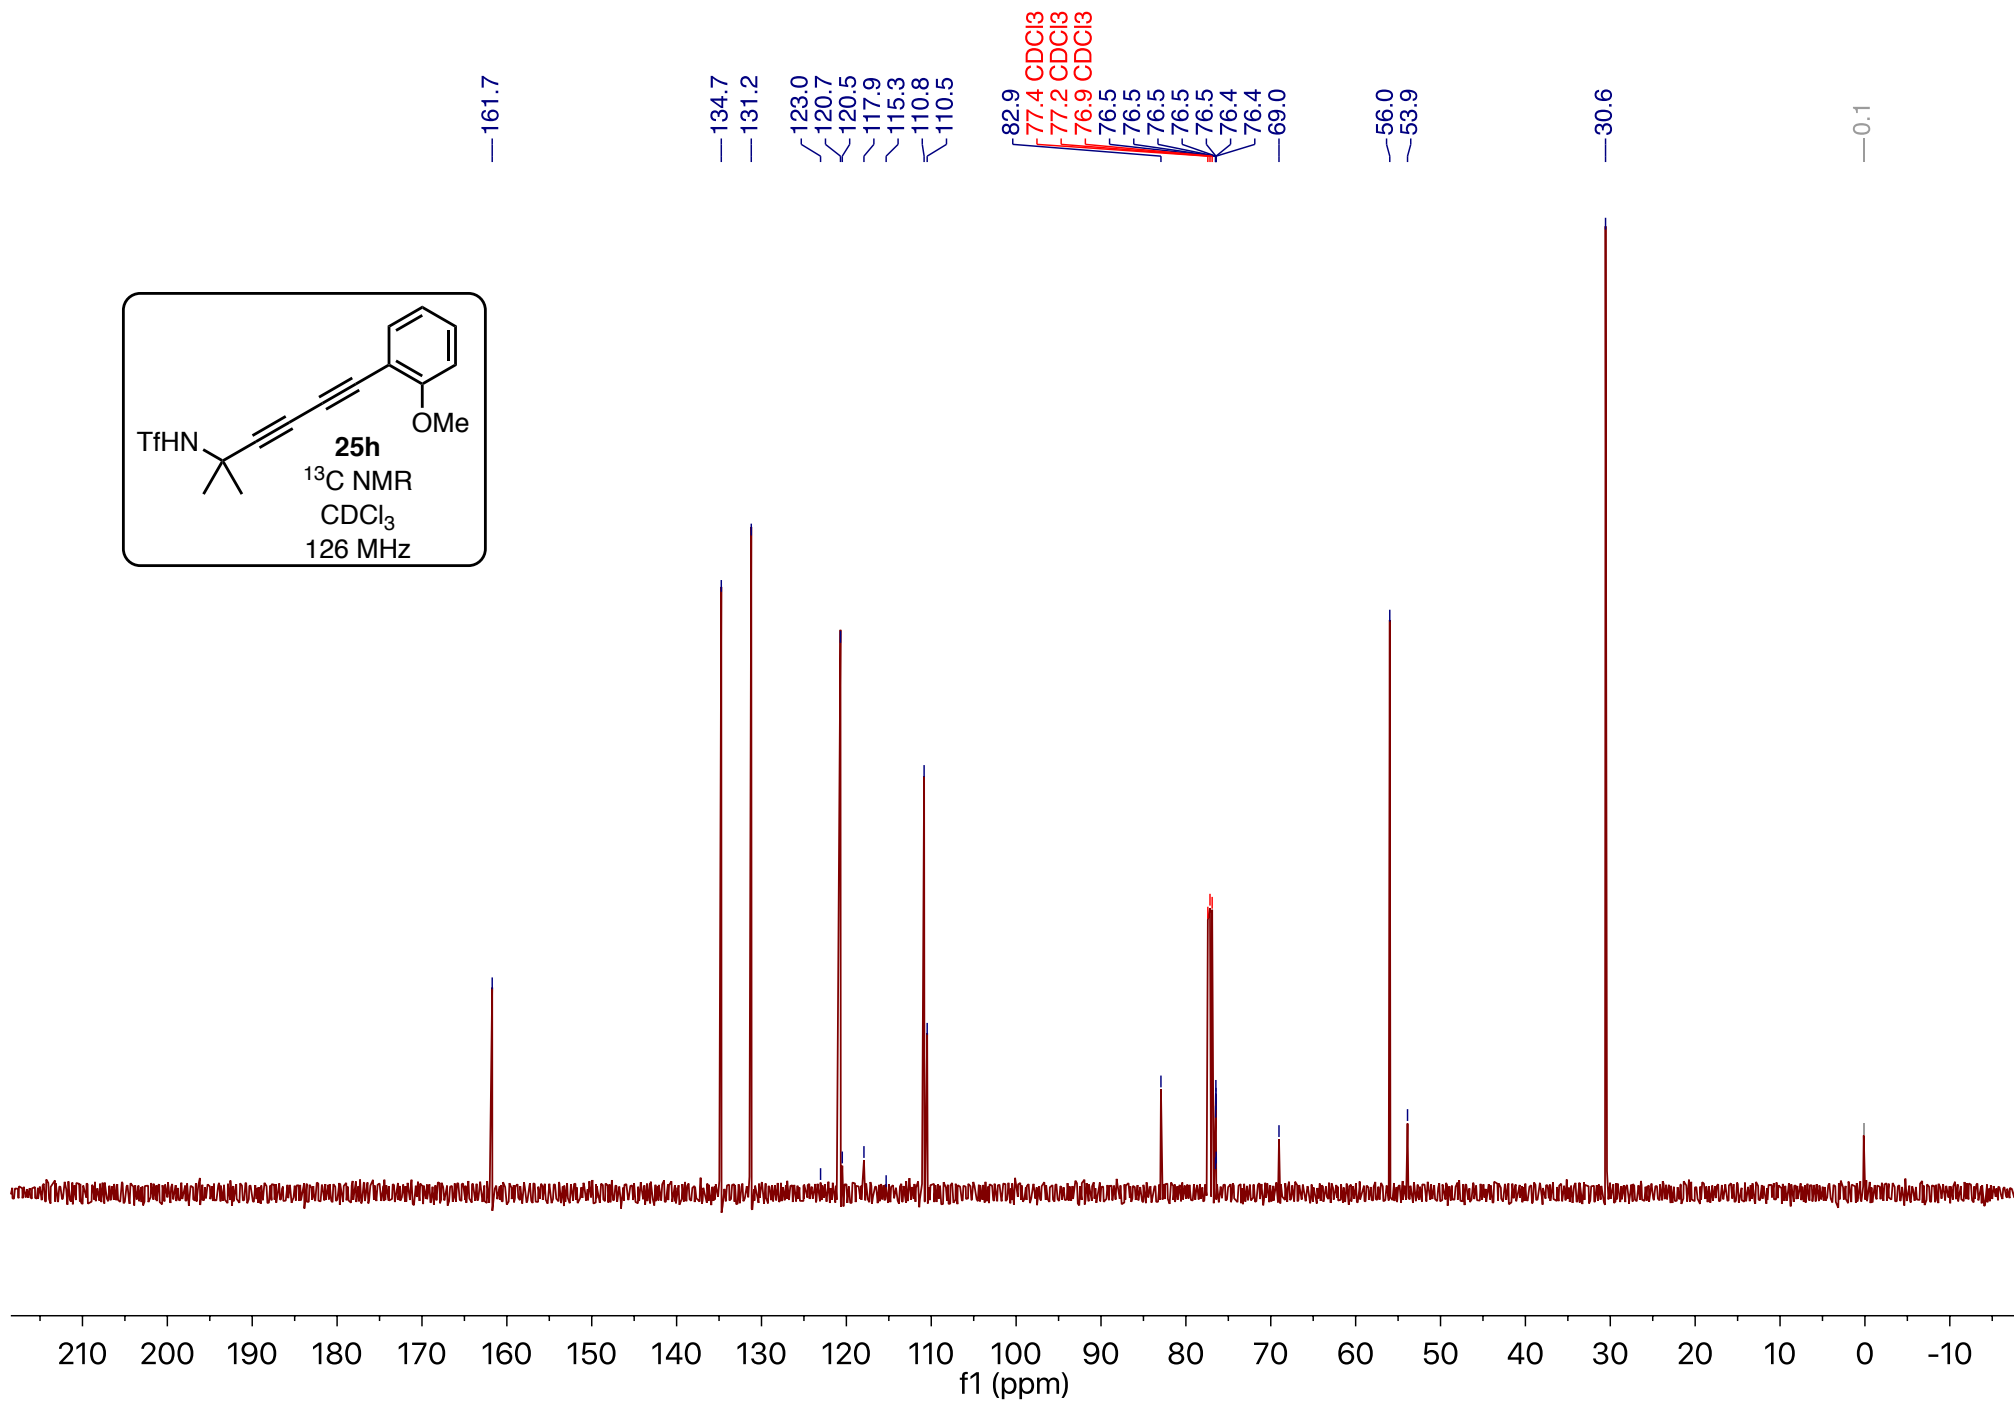

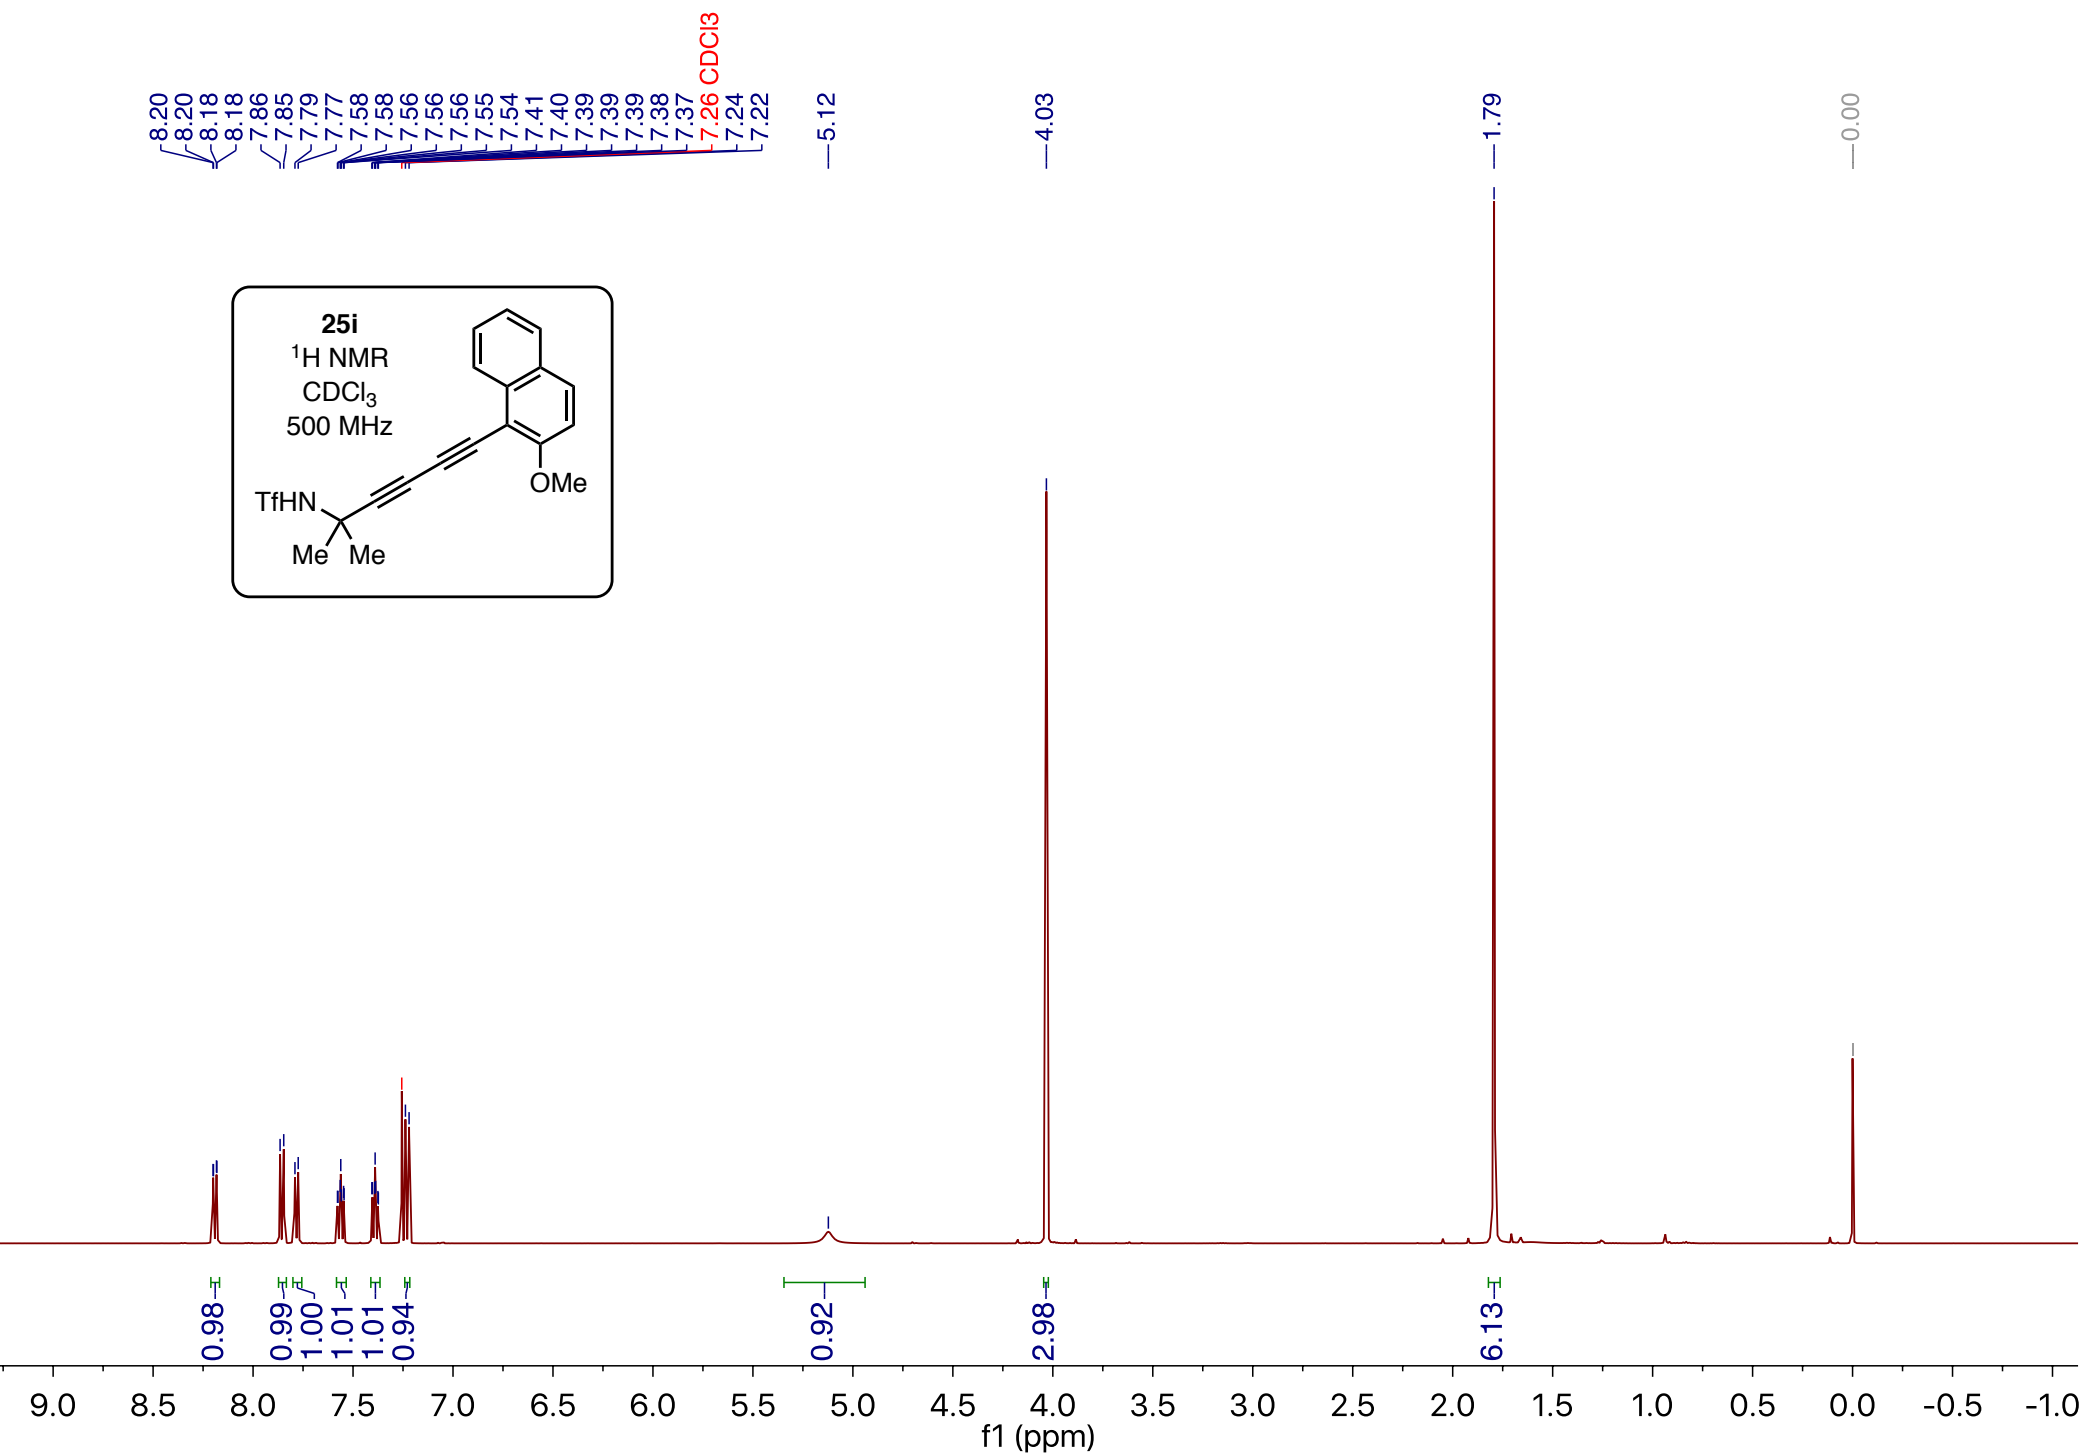

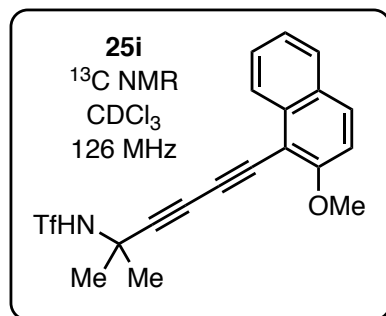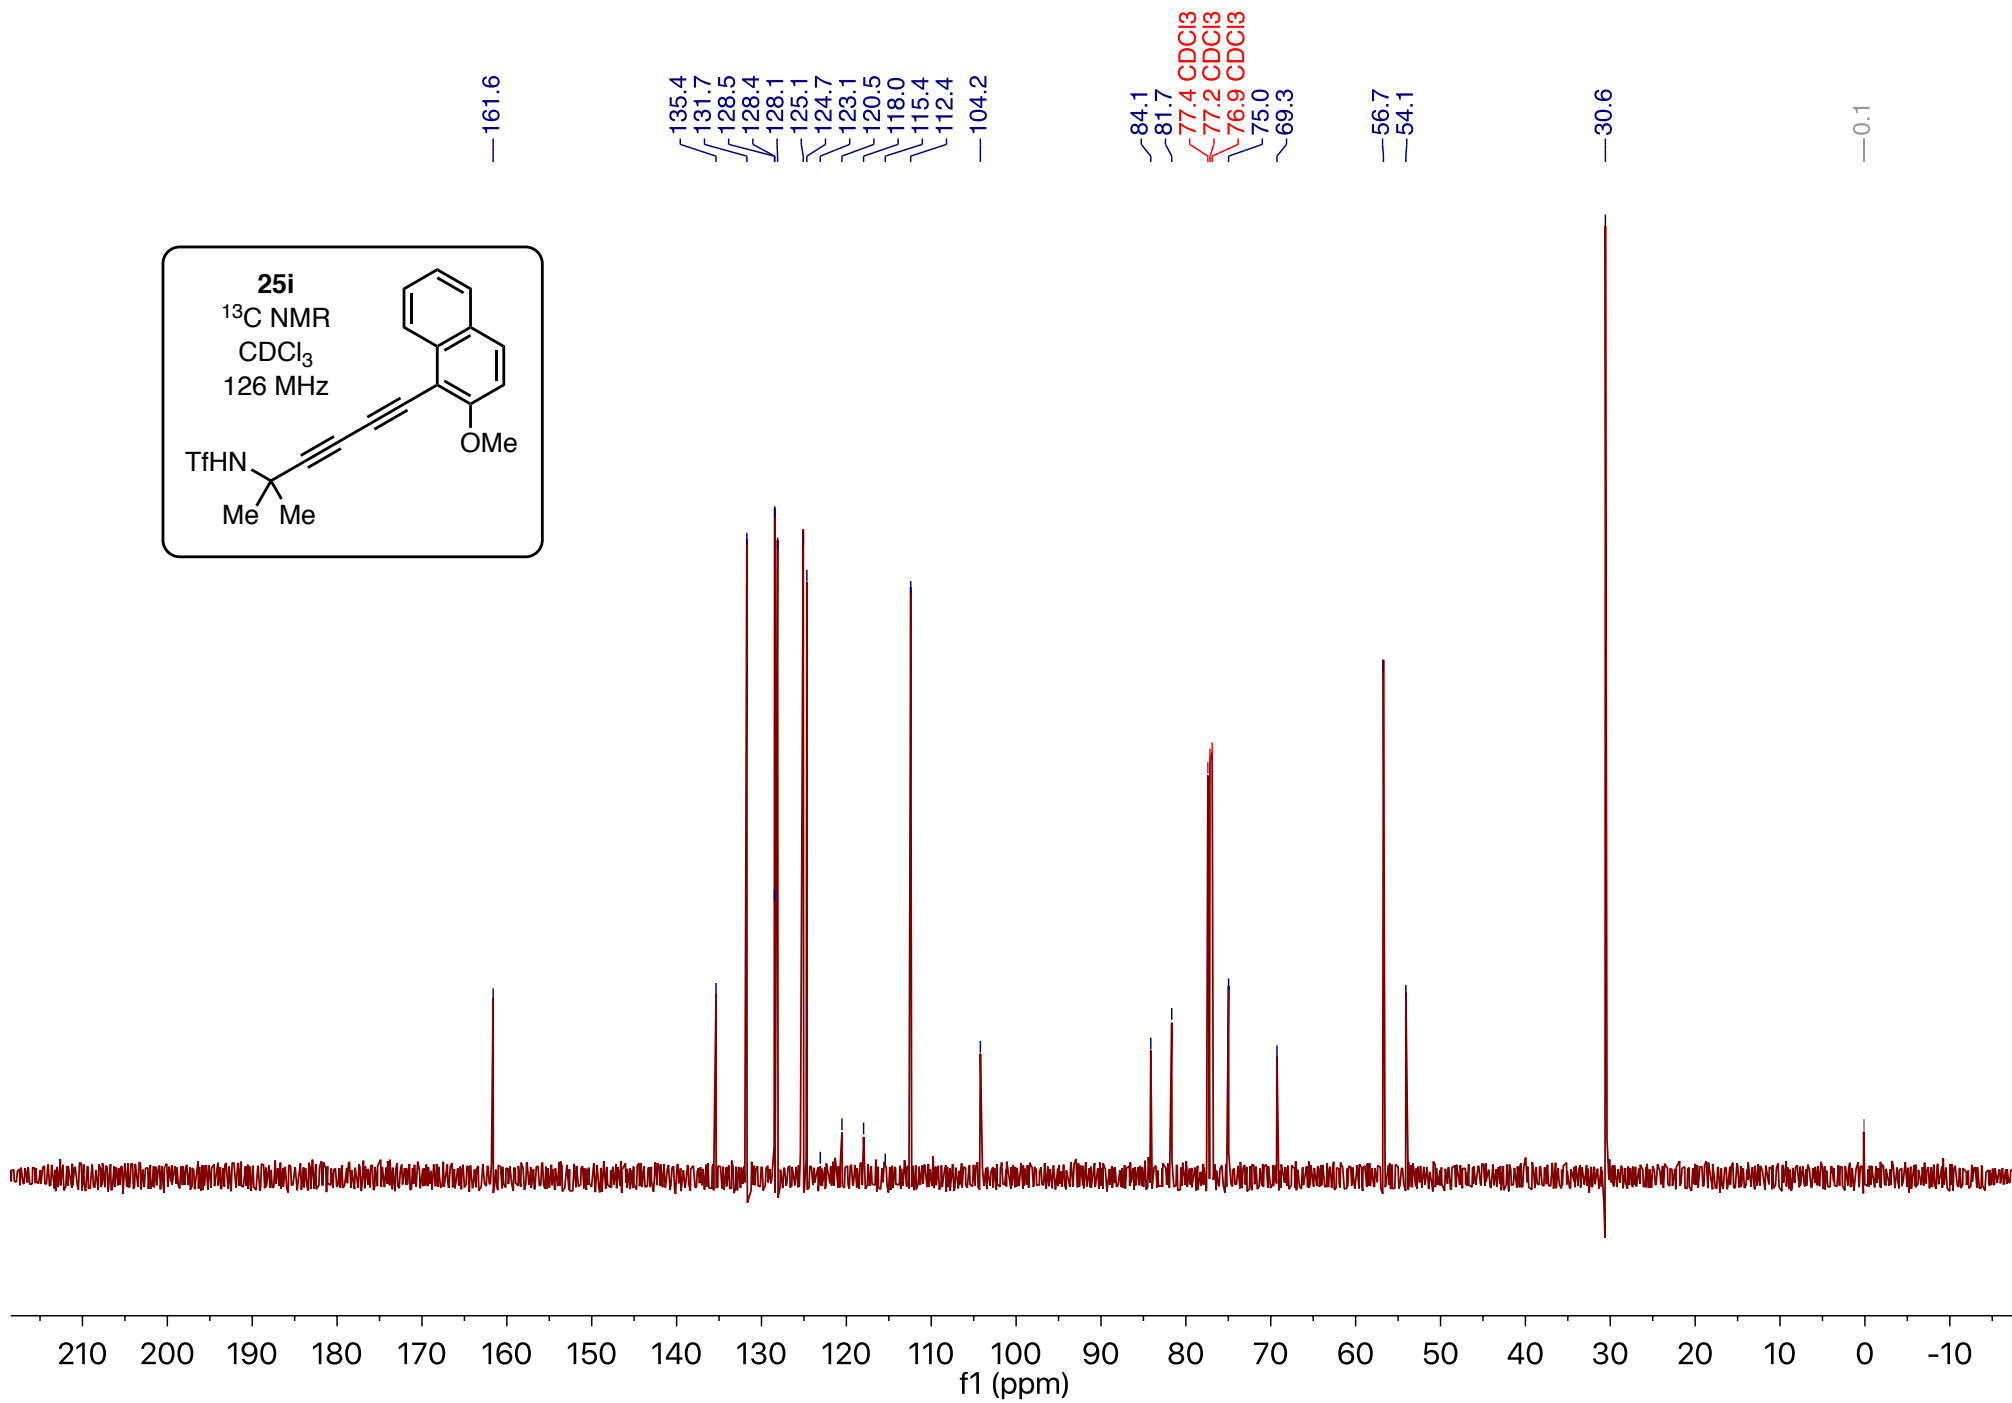

7.47  
7.46  
7.44  
7.34  
7.32  
7.26 CDCl<sub>3</sub>  
7.20  
7.19

4.24  
4.23  
4.21  
4.20  
4.19  
4.18  
4.17  
4.16  
4.15  
3.05  
3.04  
3.02  
3.02  
3.01  
3.00  
2.99  
2.99  
2.97  
2.96  
2.14  
2.12  
2.11  
2.10  
2.09  
2.06  
2.04

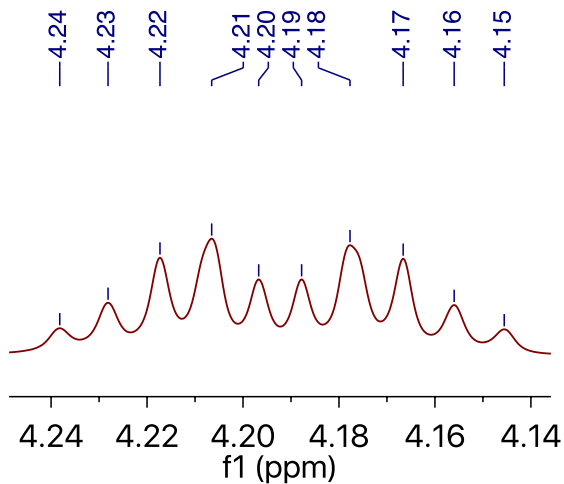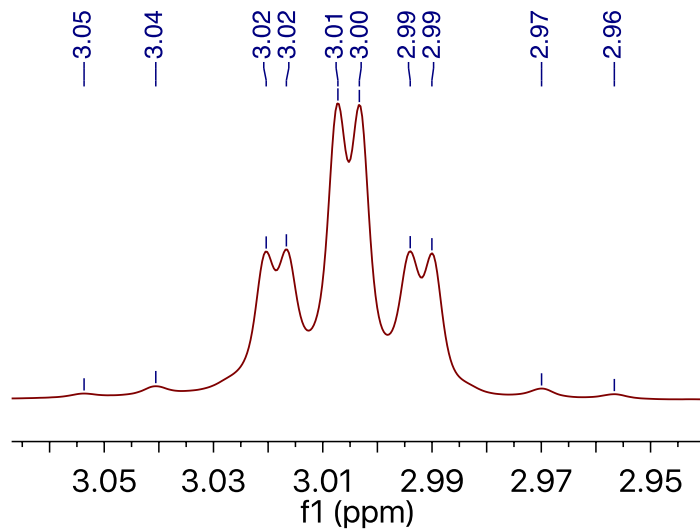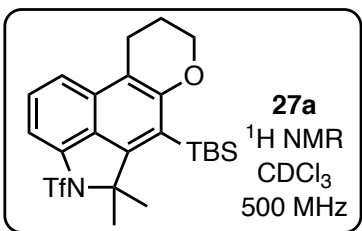

1.00  
0.96  
0.95

2.00

2.02

2.08  
6.07

9.25

3.11  
2.96

0.95

0.51  
0.46

0.00

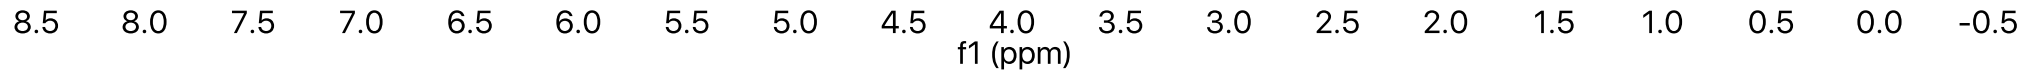



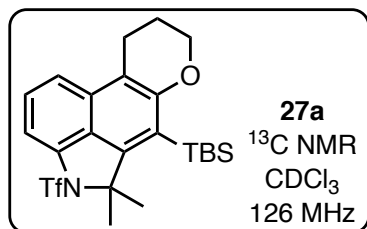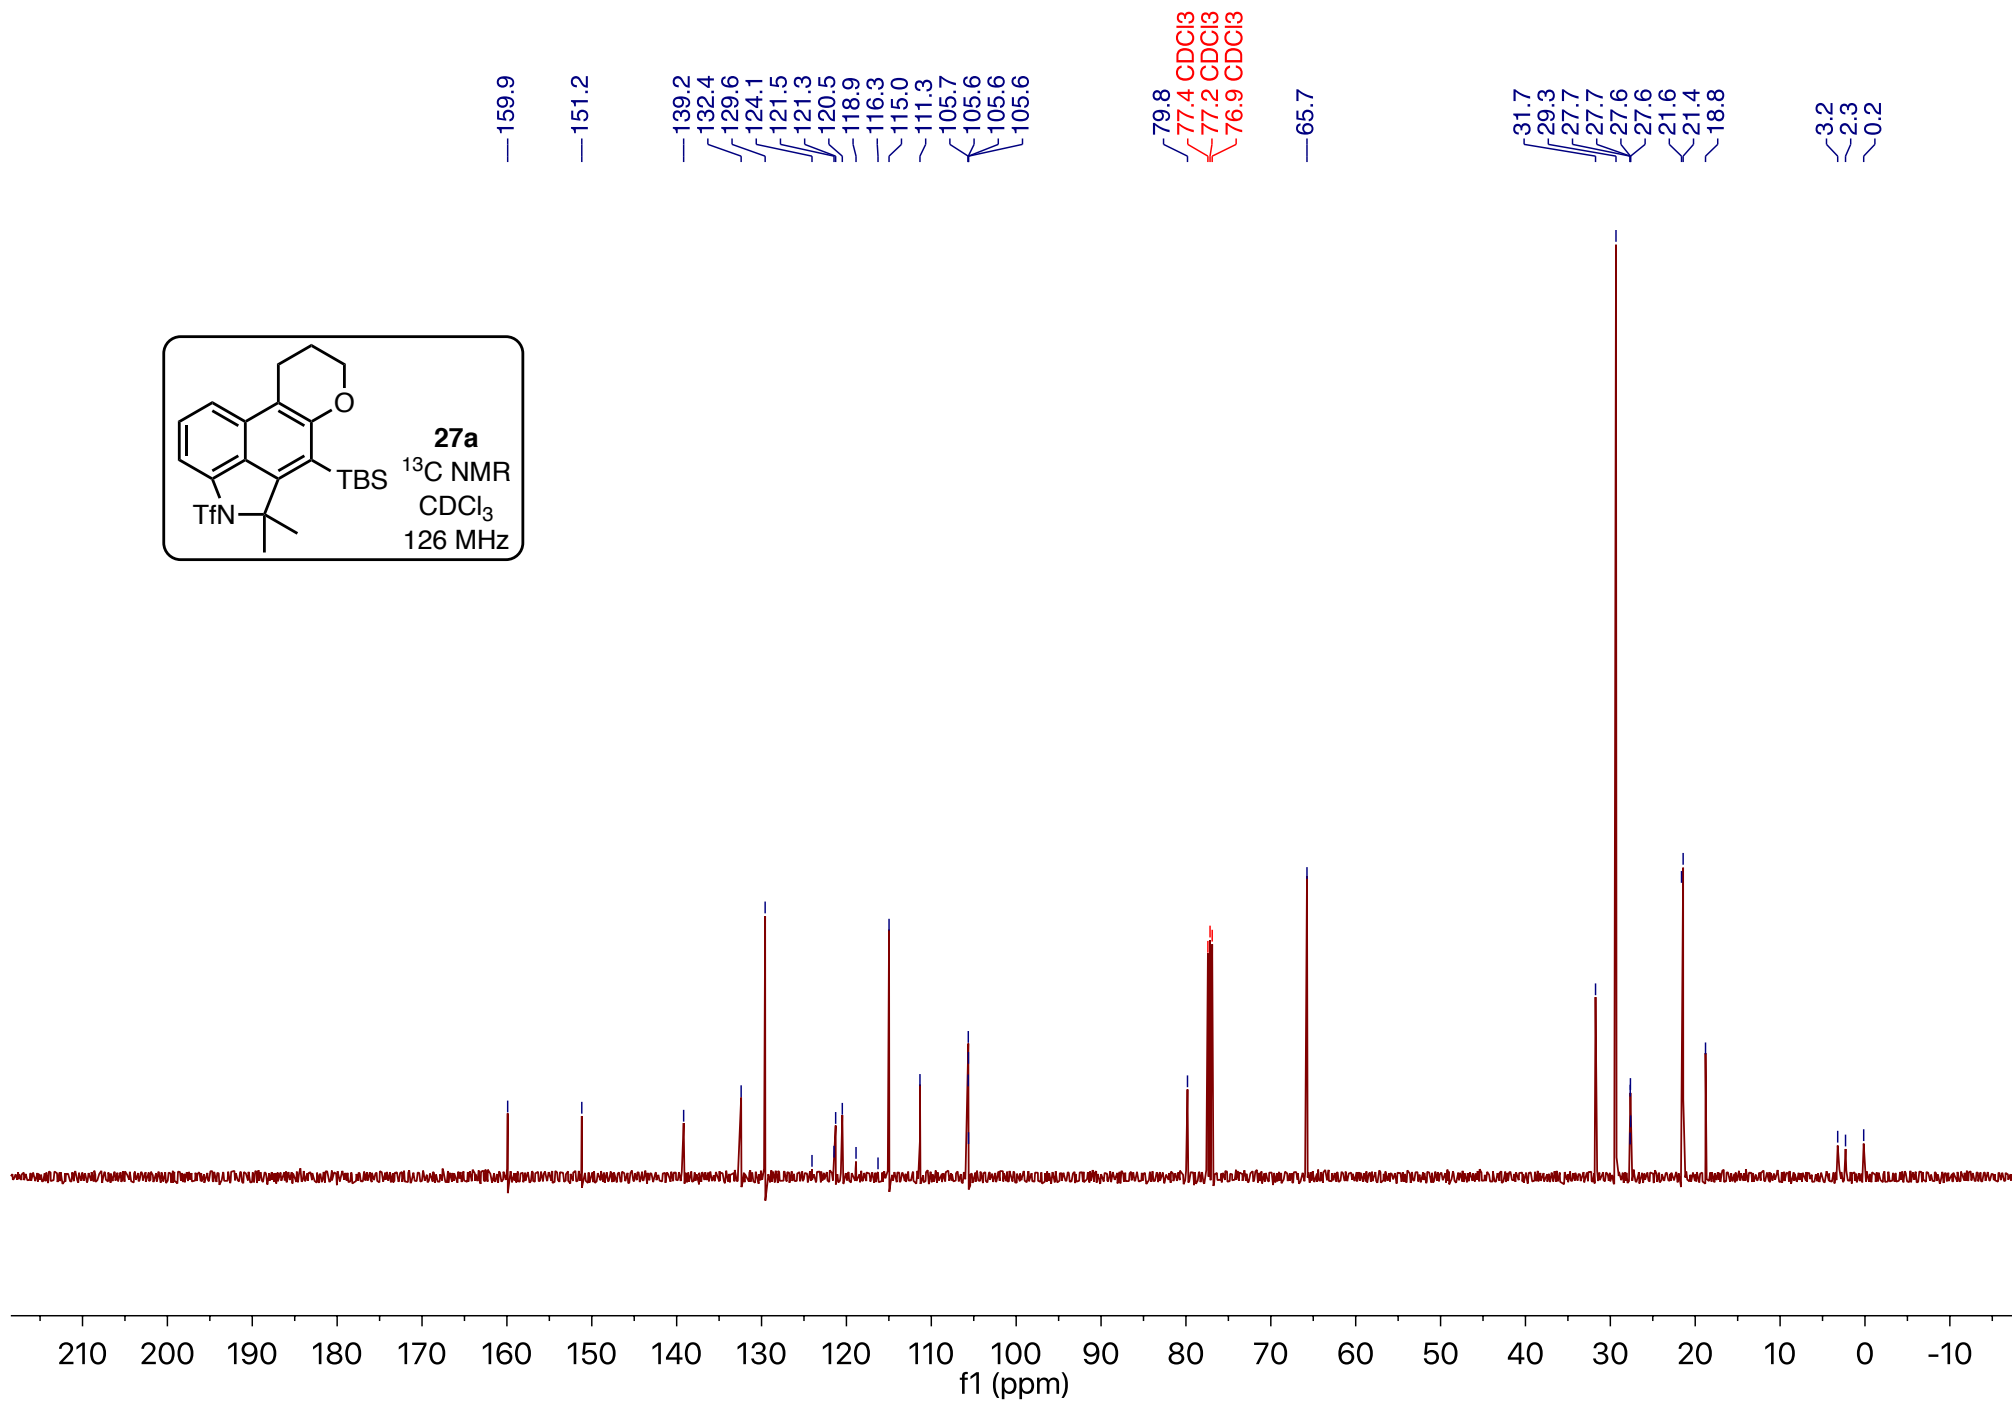

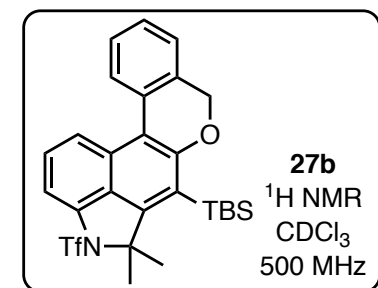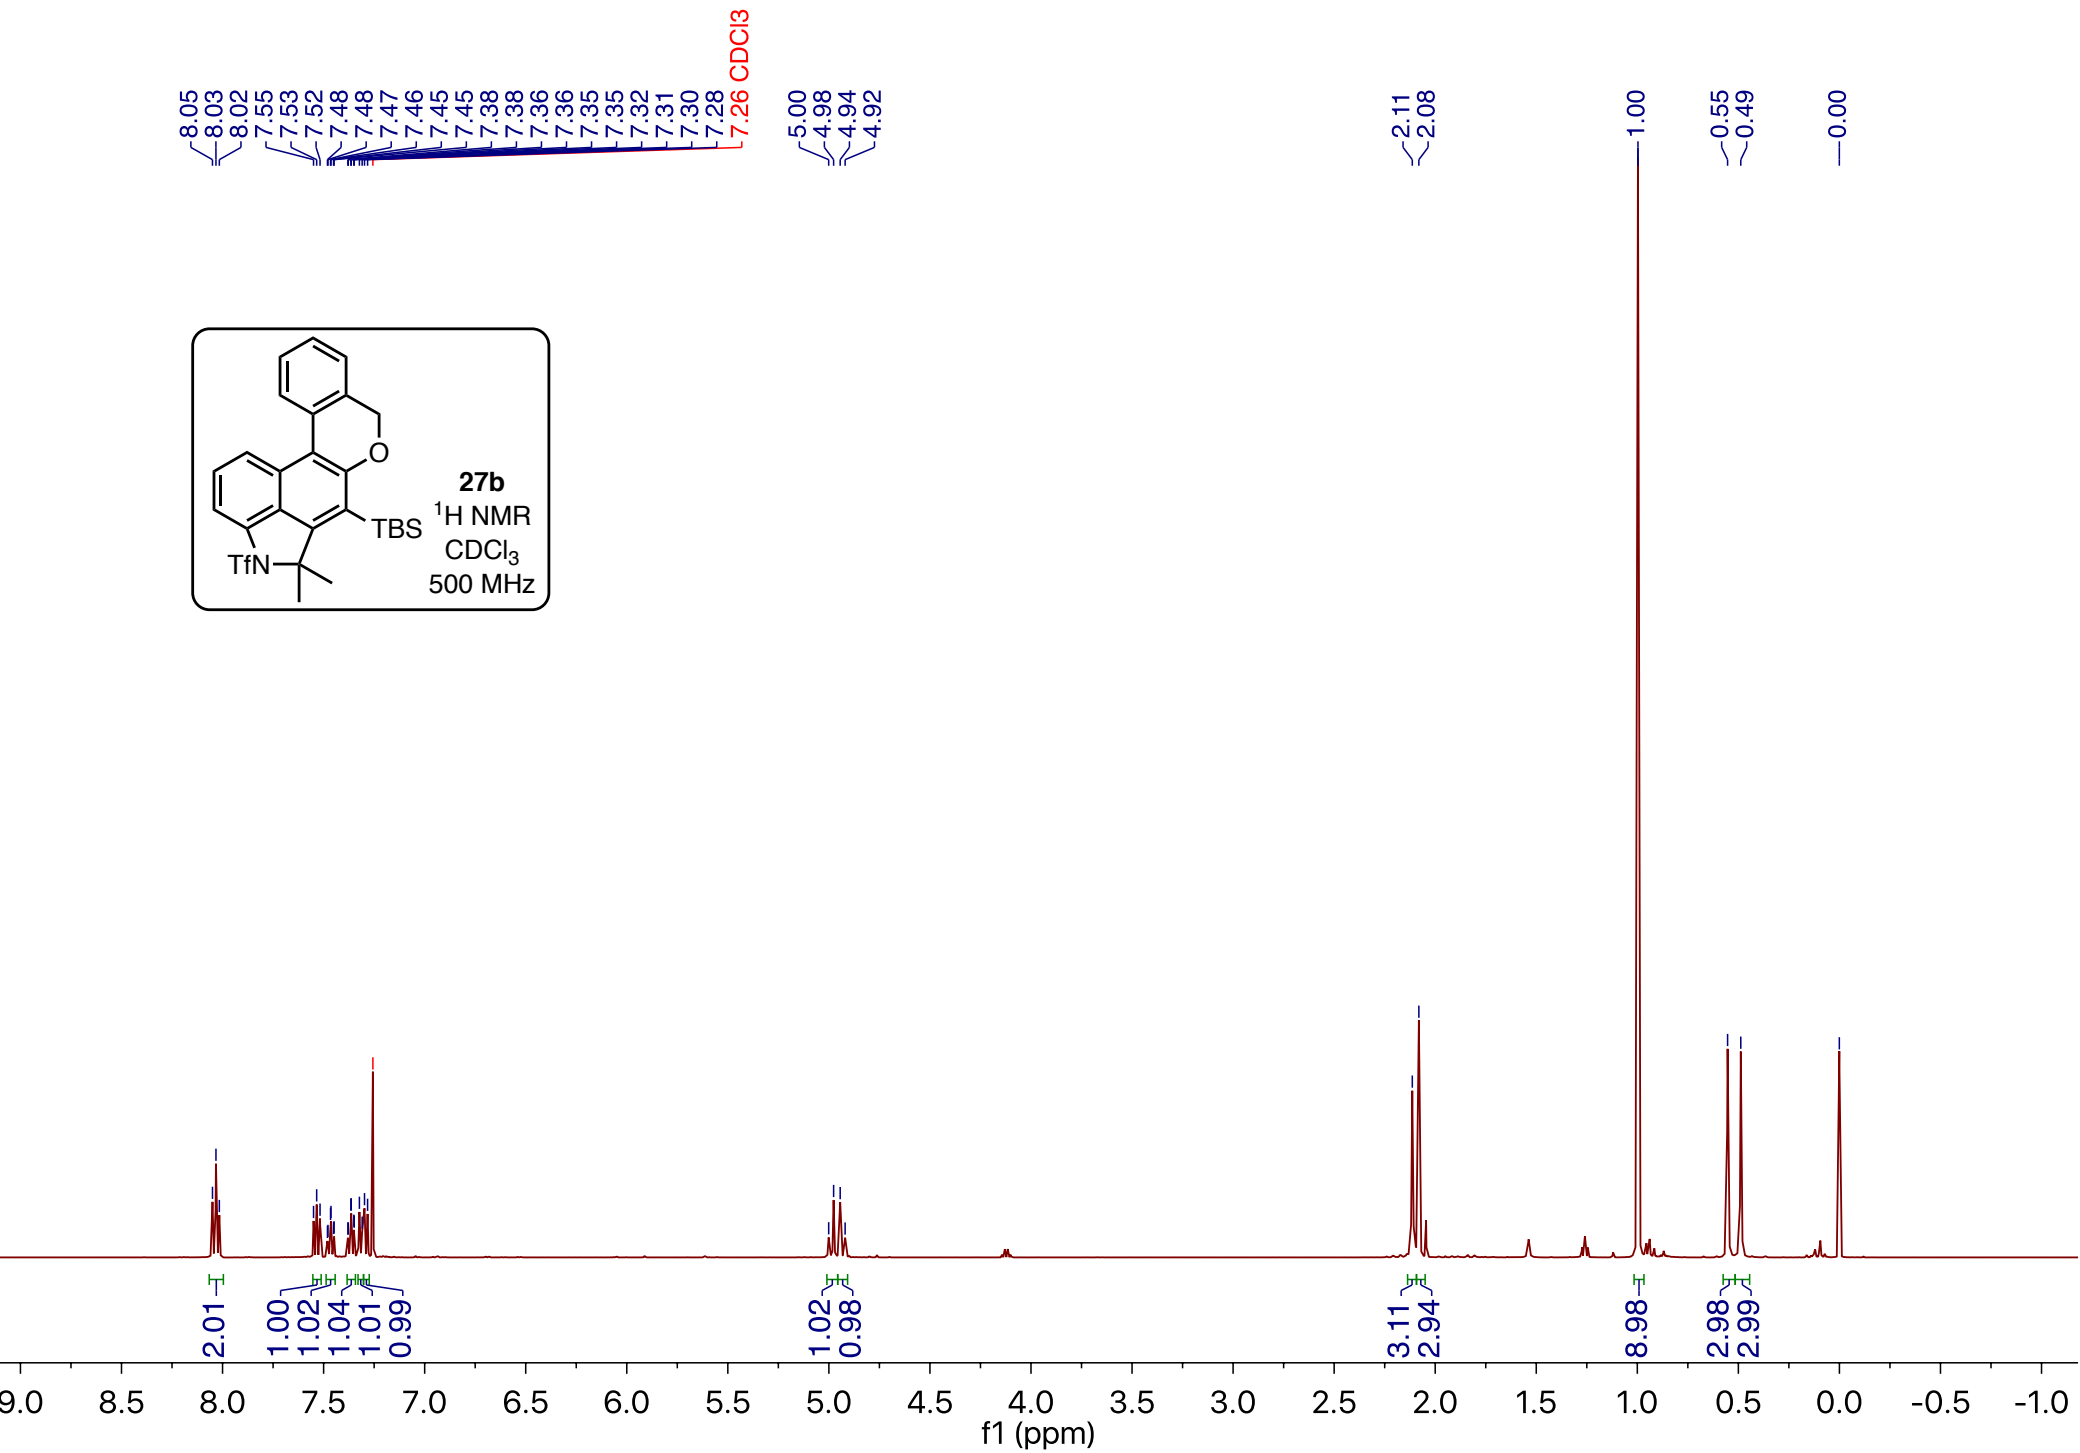

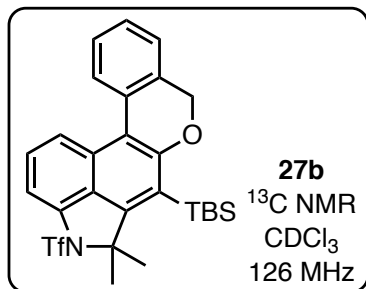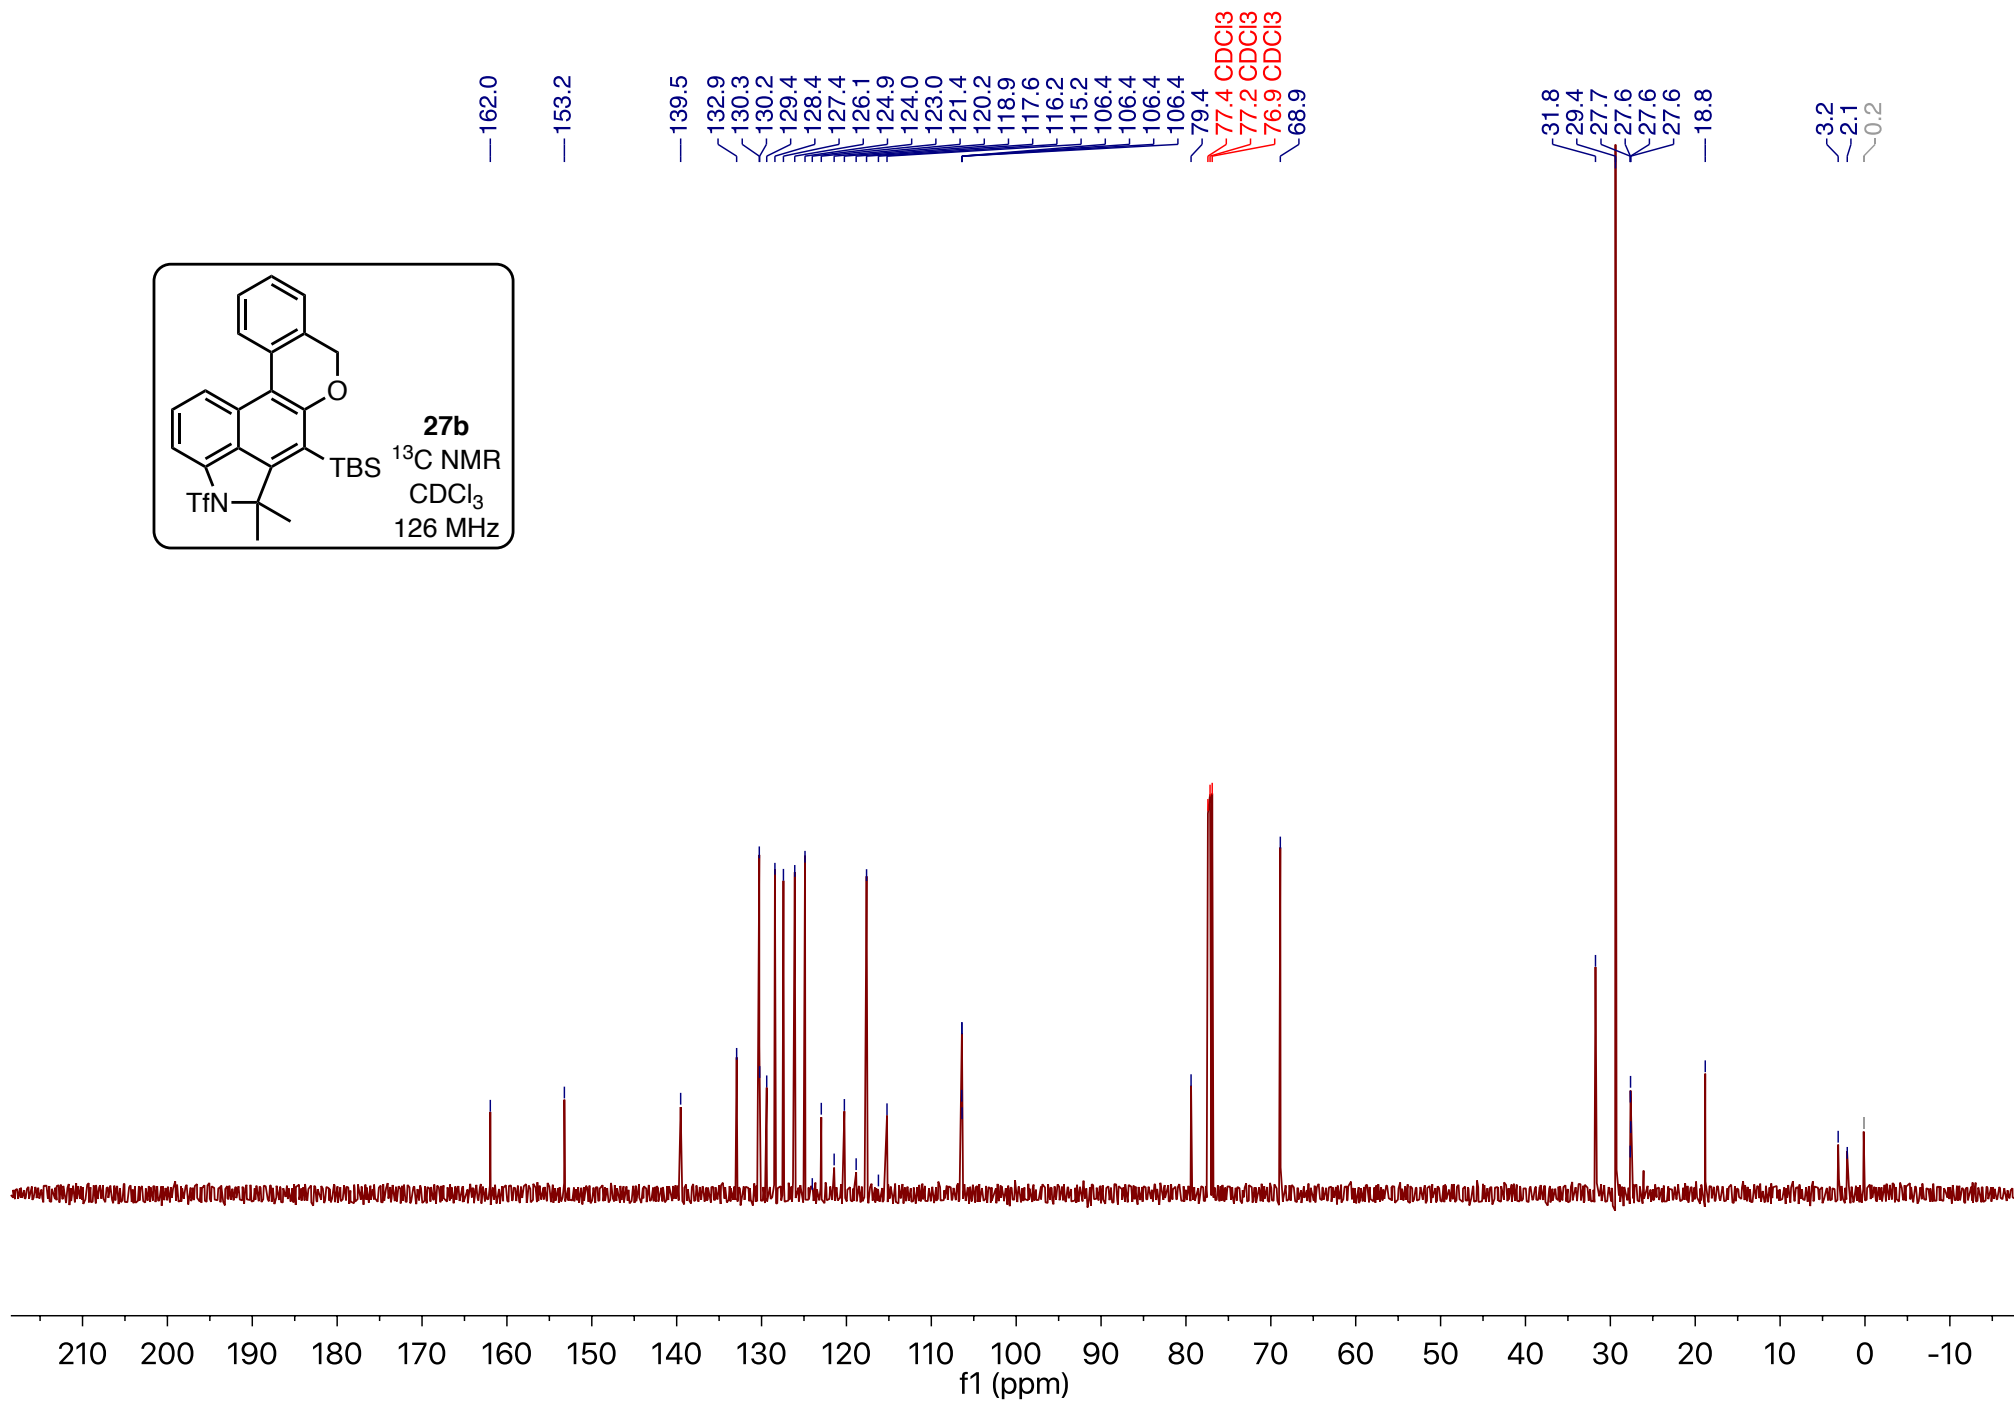

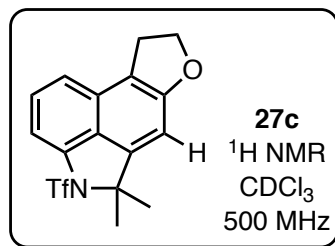

7.47  
7.46  
7.44  
7.26 CDCl<sub>3</sub>  
7.24  
7.23  
7.15  
7.13  
6.78

4.81  
4.79  
4.77

3.44  
3.44  
3.43  
3.42  
3.41  
3.41

1.91

0.00

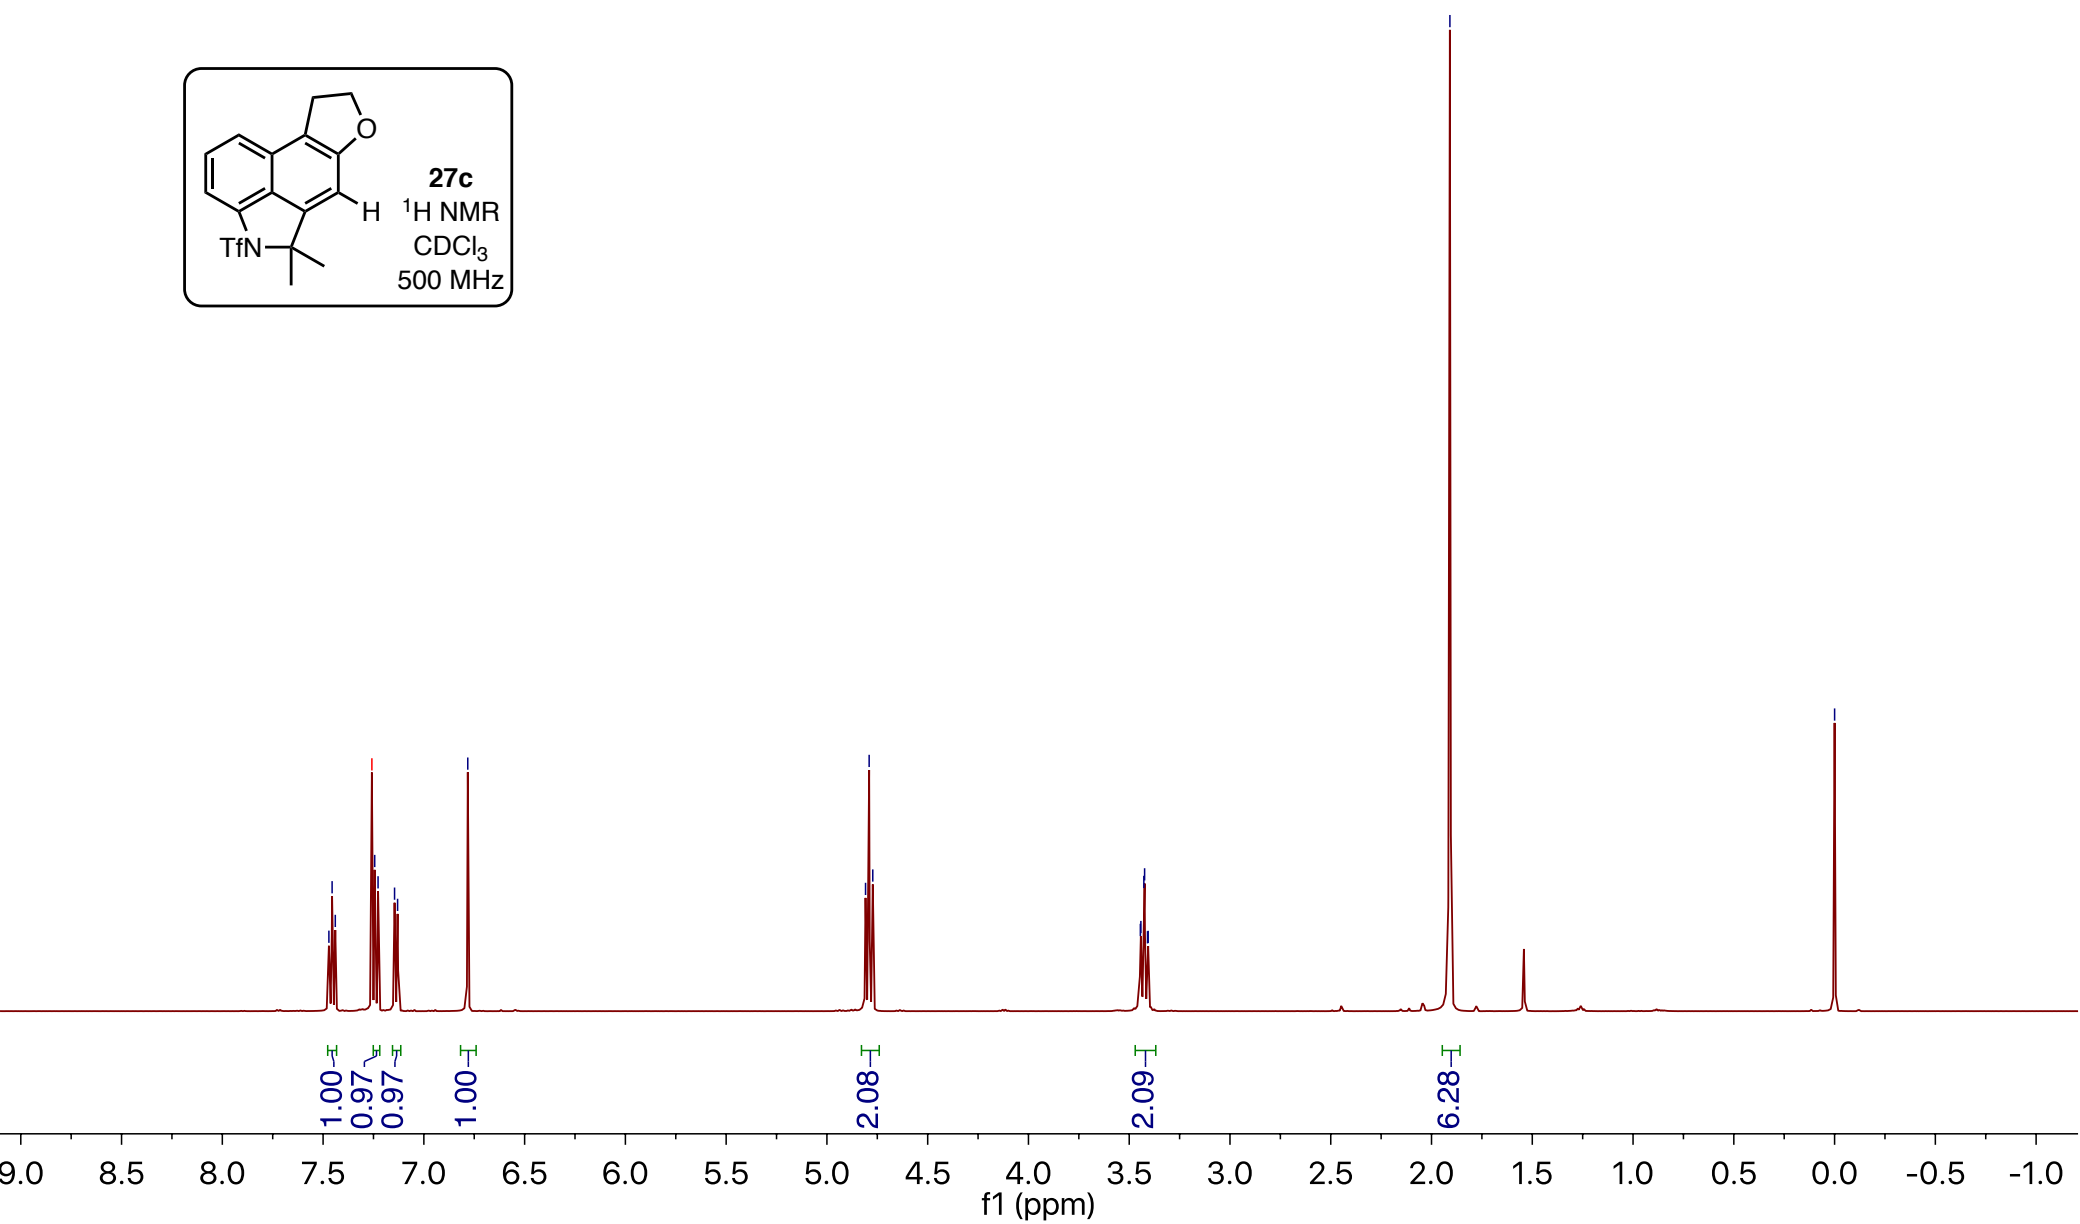

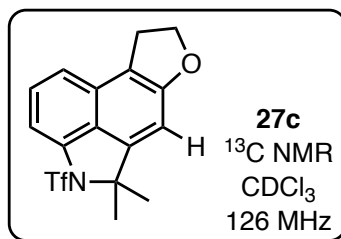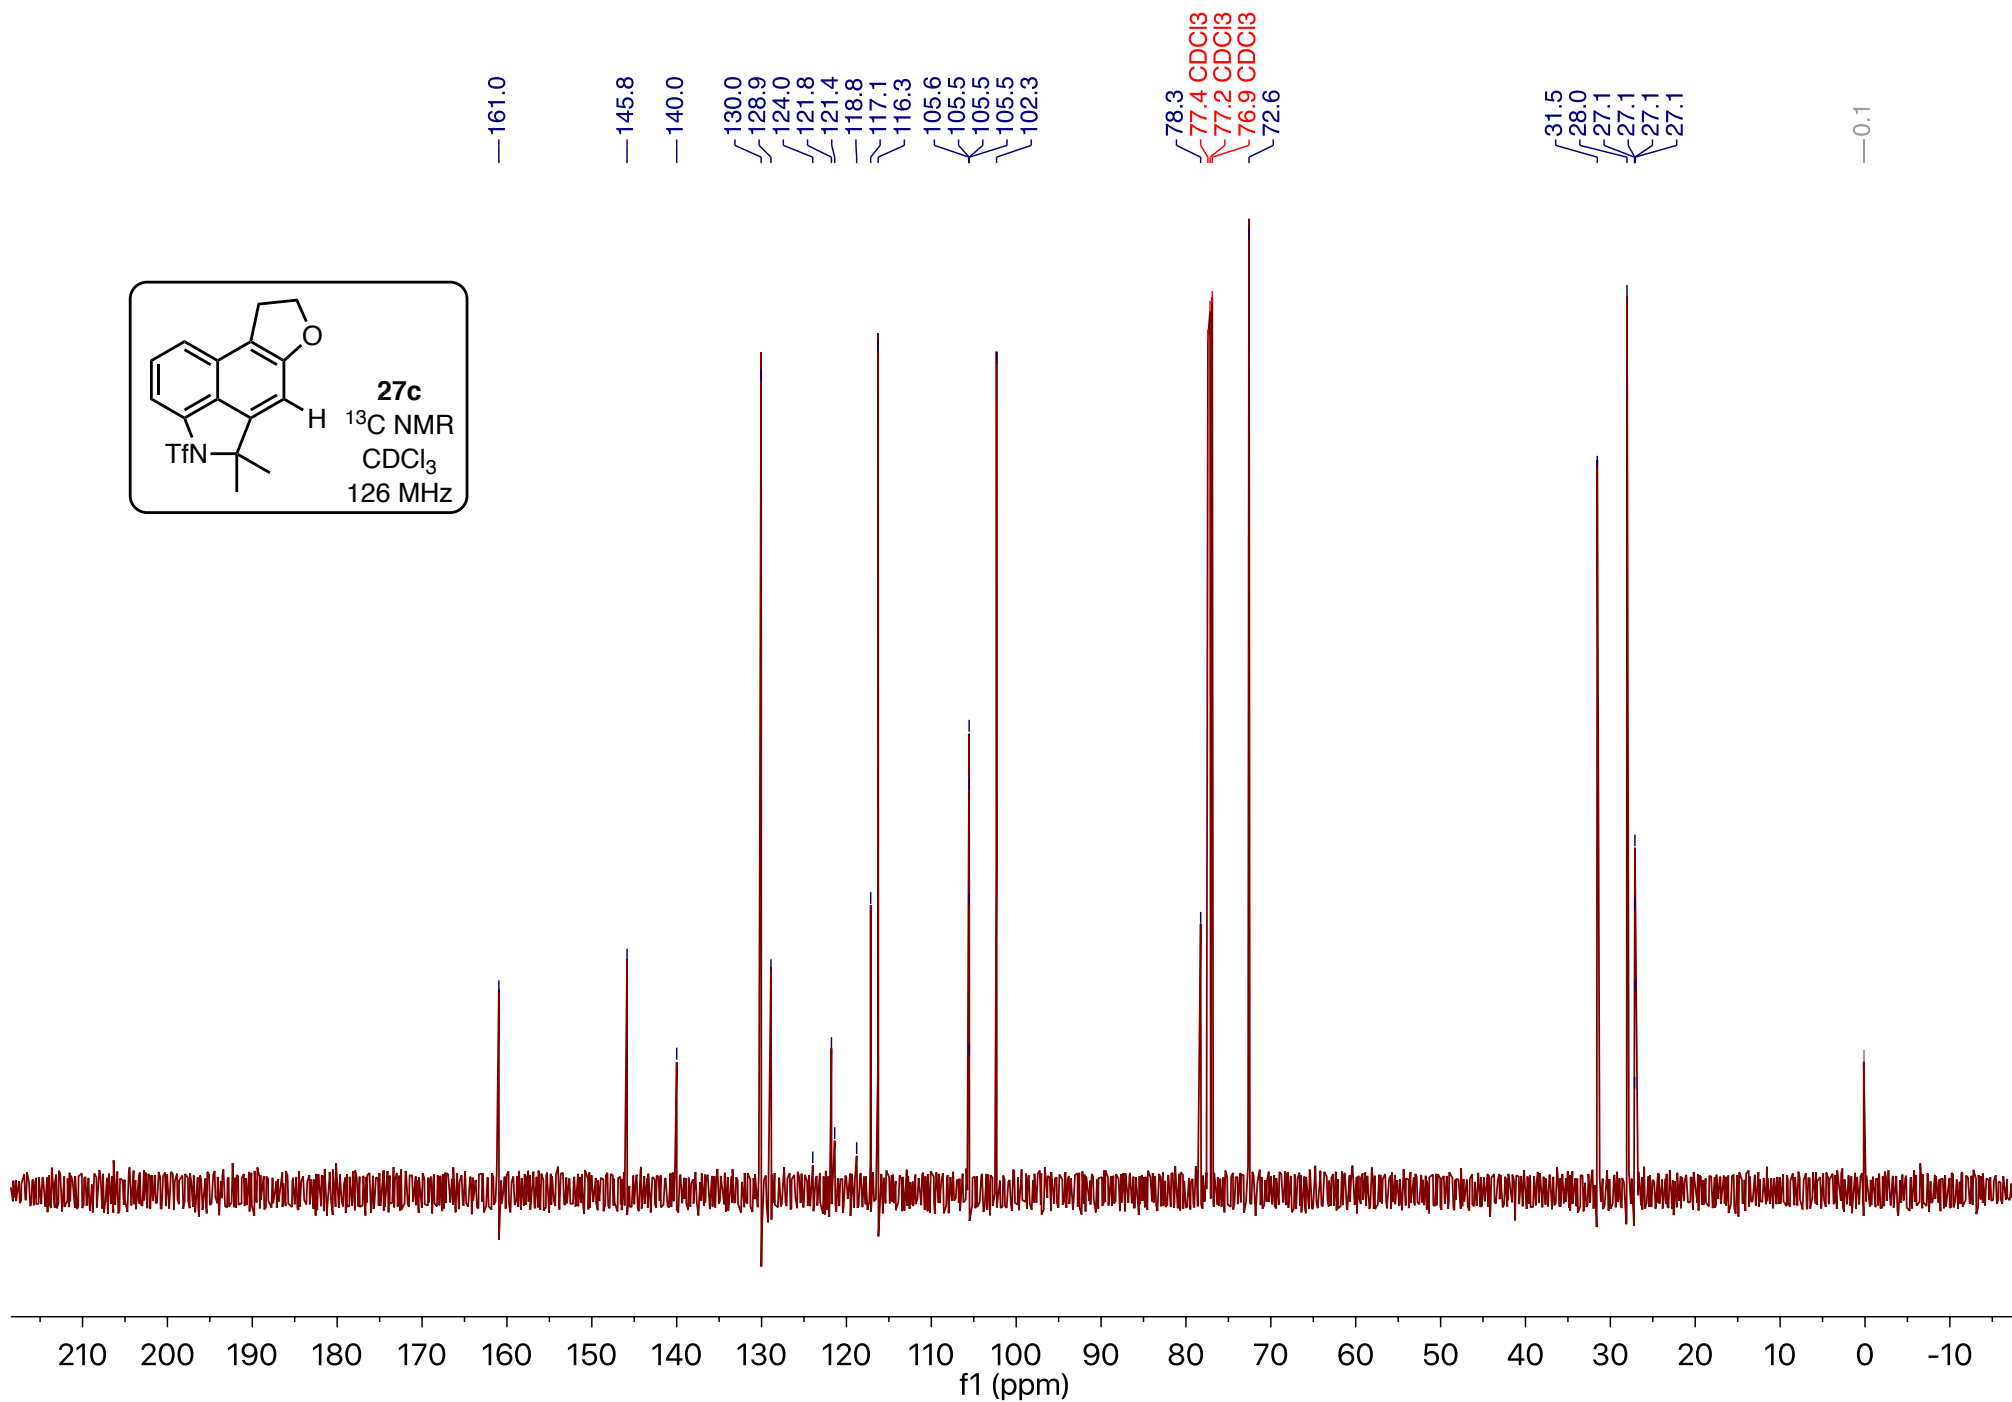

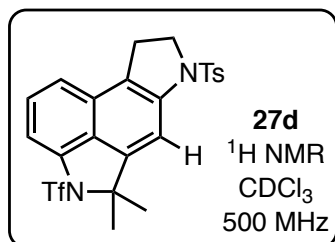

7.69  
7.65  
7.63  
7.46  
7.45  
7.43  
7.26 CDCl<sub>3</sub>  
7.22  
7.20  
7.19  
7.18  
7.17

4.17  
4.15  
4.15  
4.13  
4.13  
4.12  
4.11  
4.09  
3.16  
3.15  
3.13  
3.11  
3.09  
3.08  
3.06

—2.35

—1.97

—1.54 H<sub>2</sub>O

0.00

1.01  
1.95  
1.00  
2.86  
0.90

1.96

2.00

2.79

5.74

9.5 9.0 8.5 8.0 7.5 7.0 6.5 6.0 5.5 5.0 4.5 4.0 3.5 3.0 2.5 2.0 1.5 1.0 0.5 0.0 -0.5  
f1 (ppm)

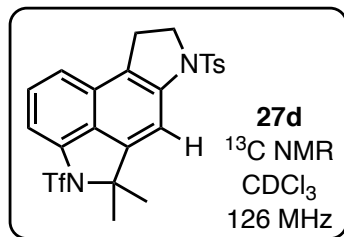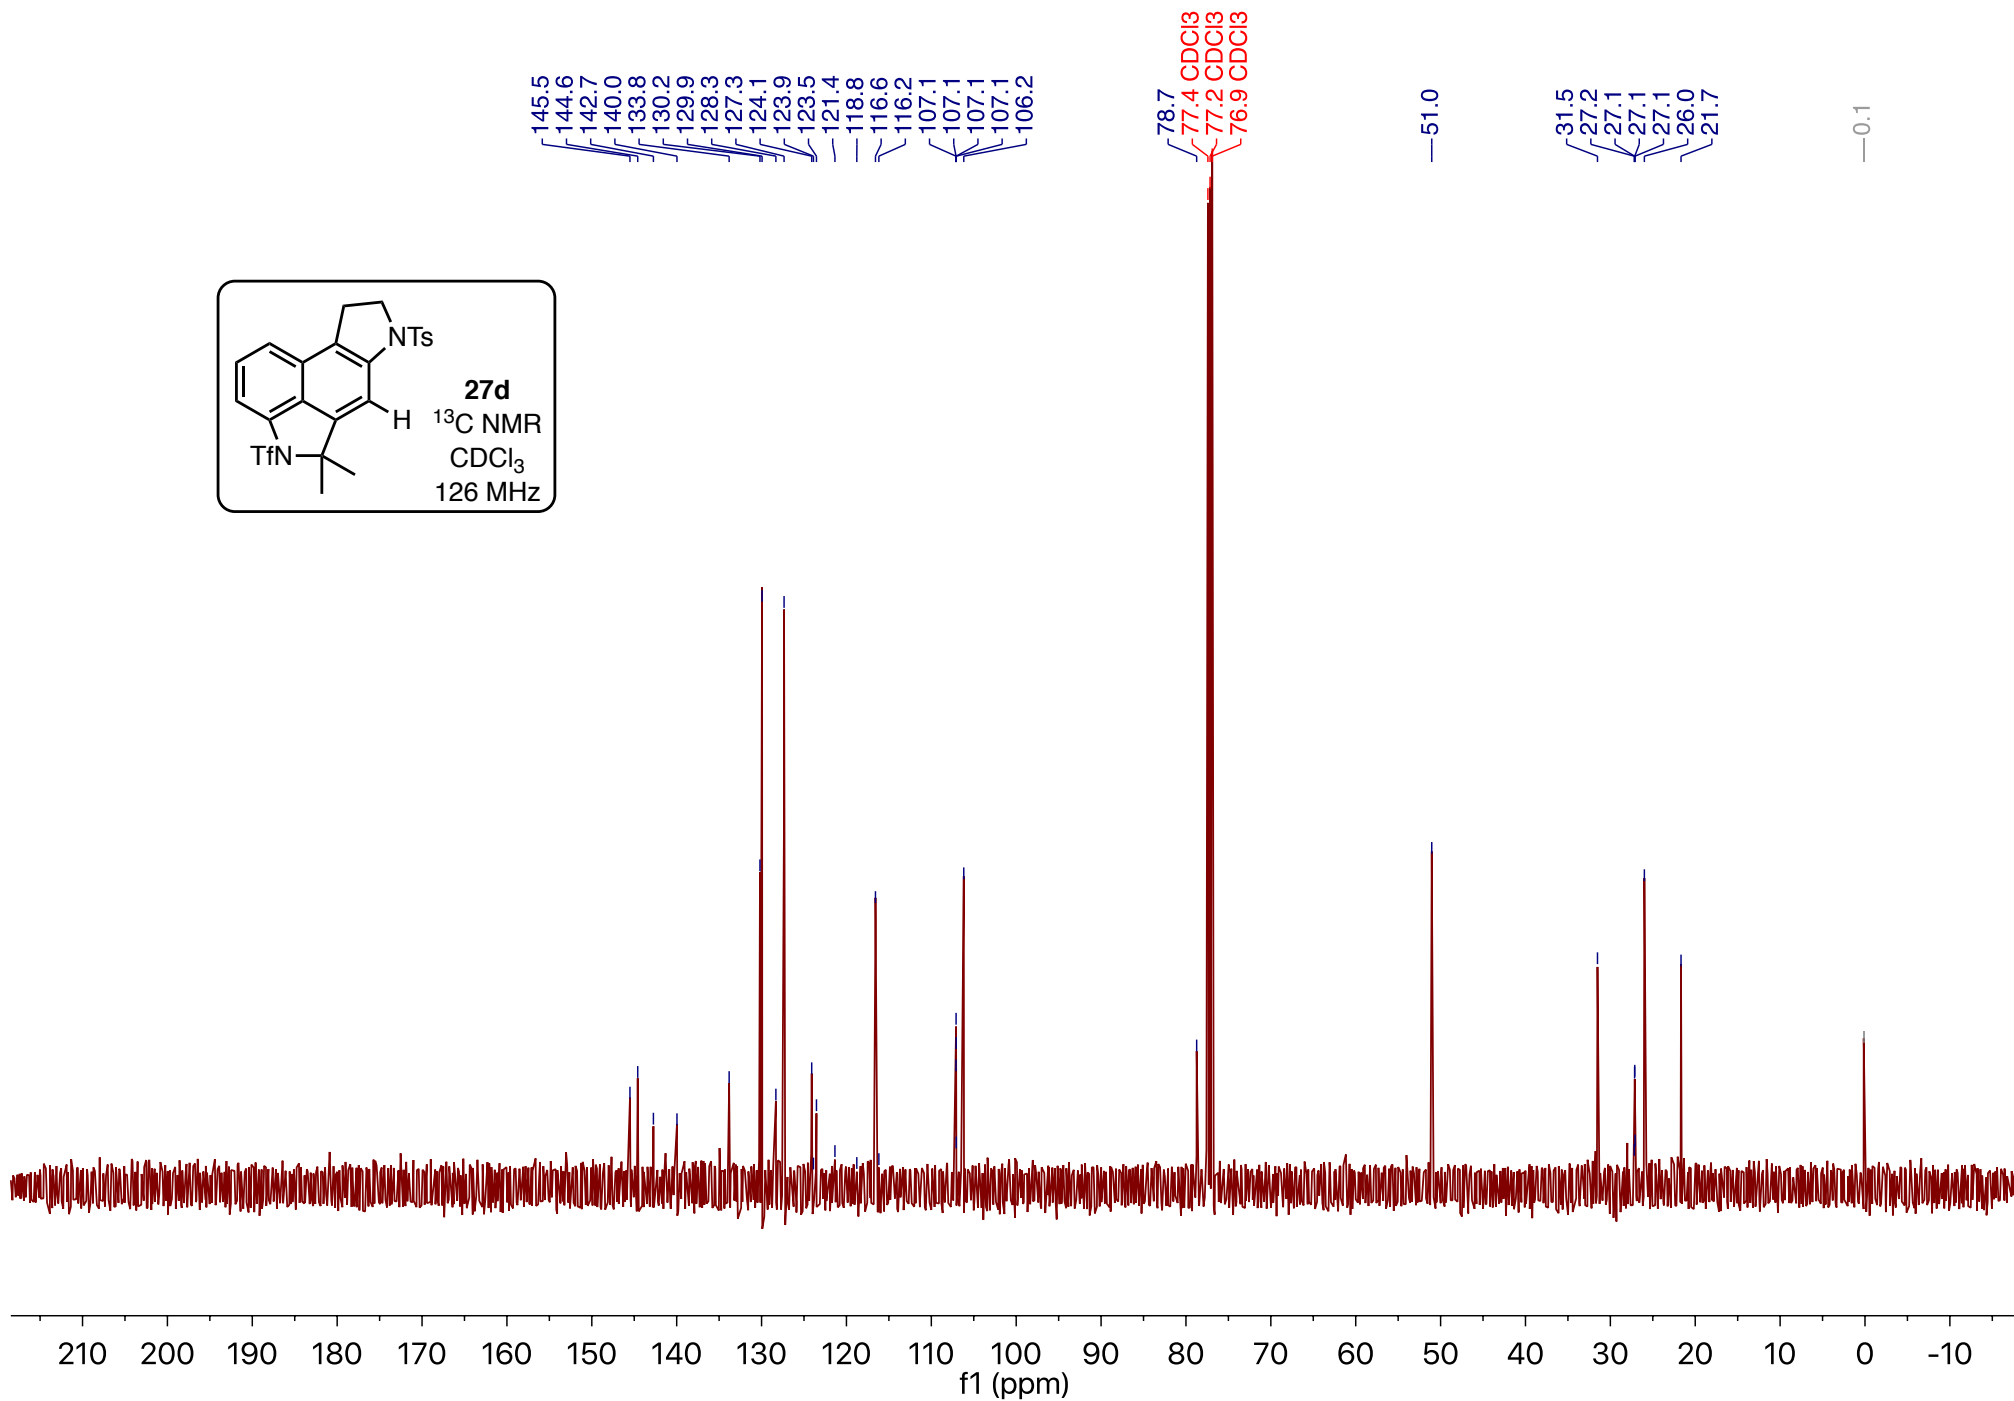

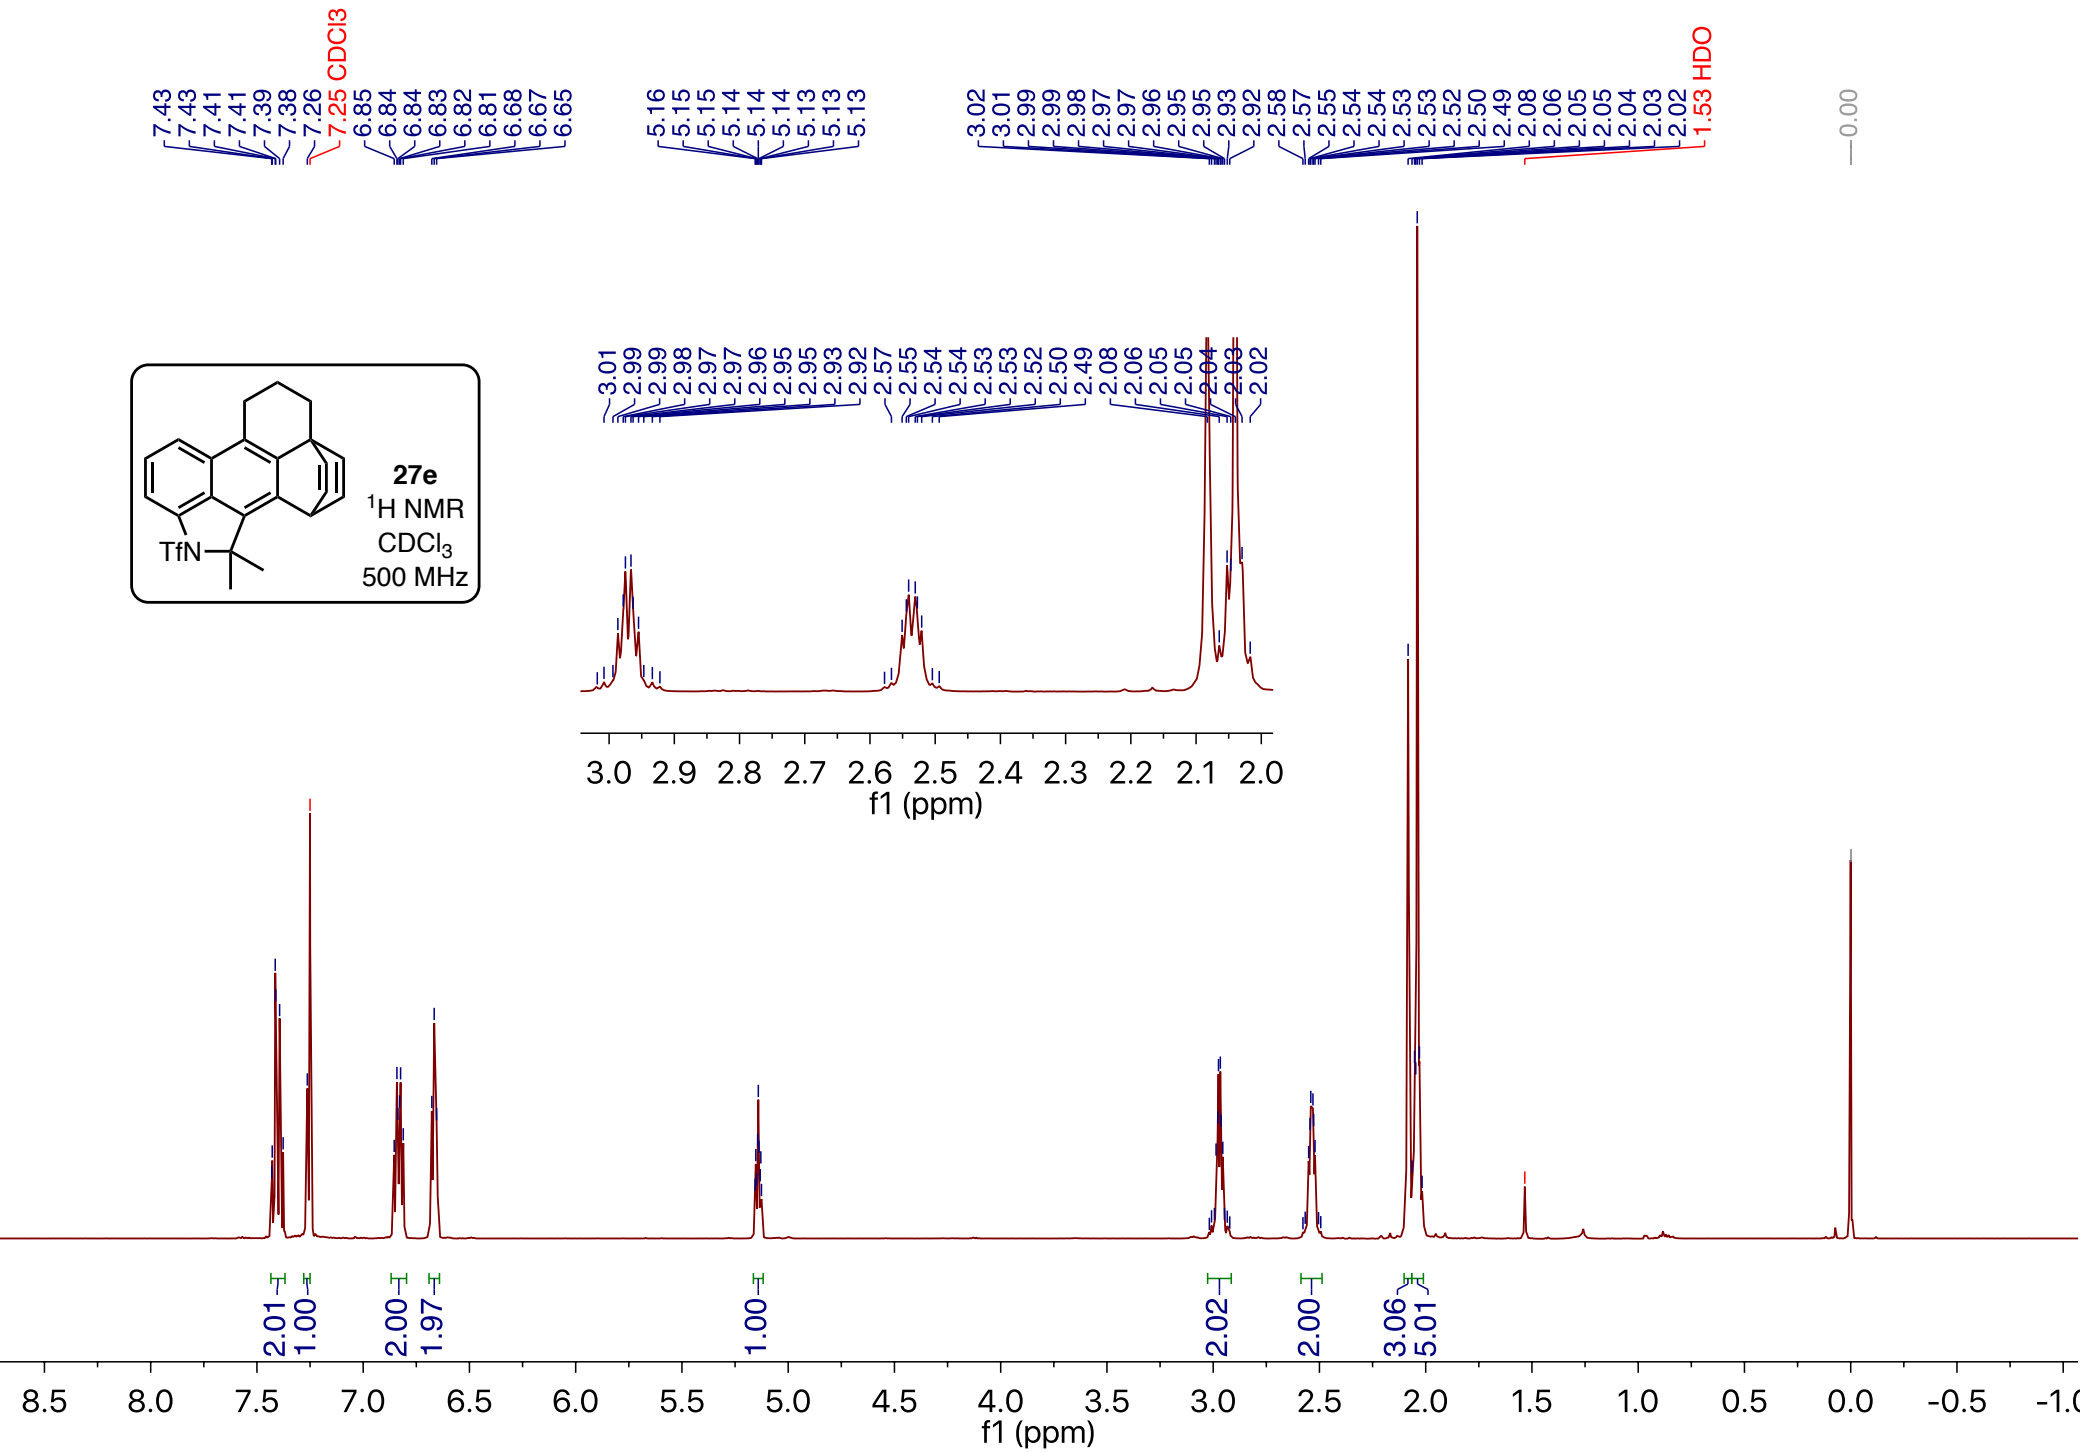



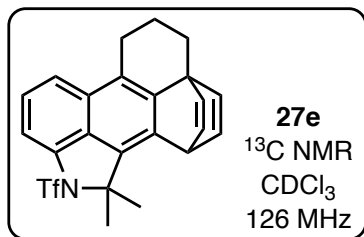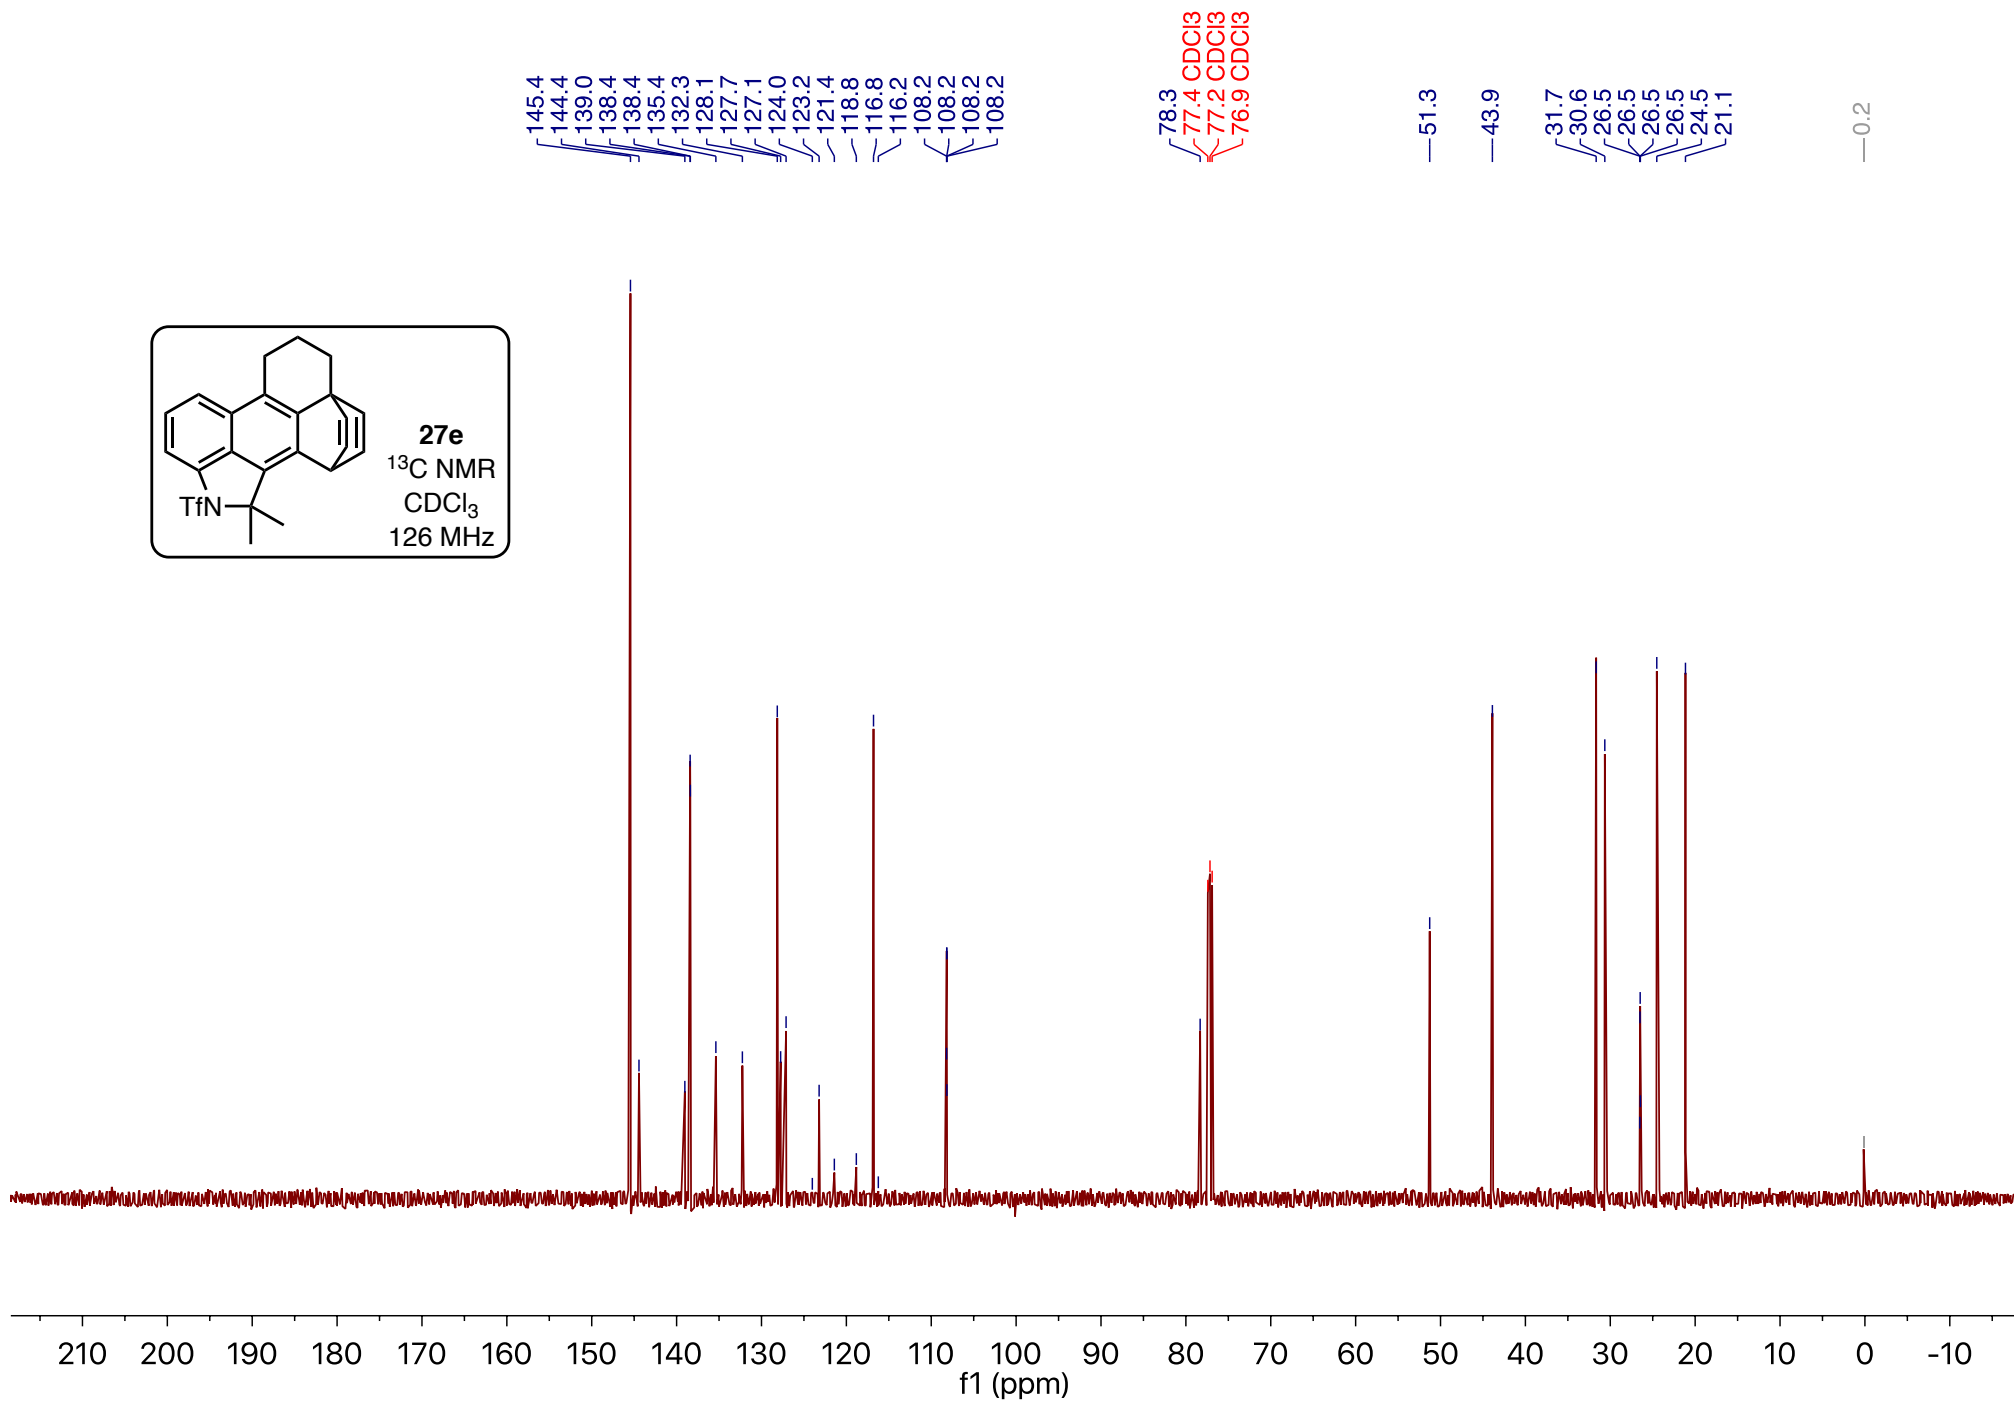

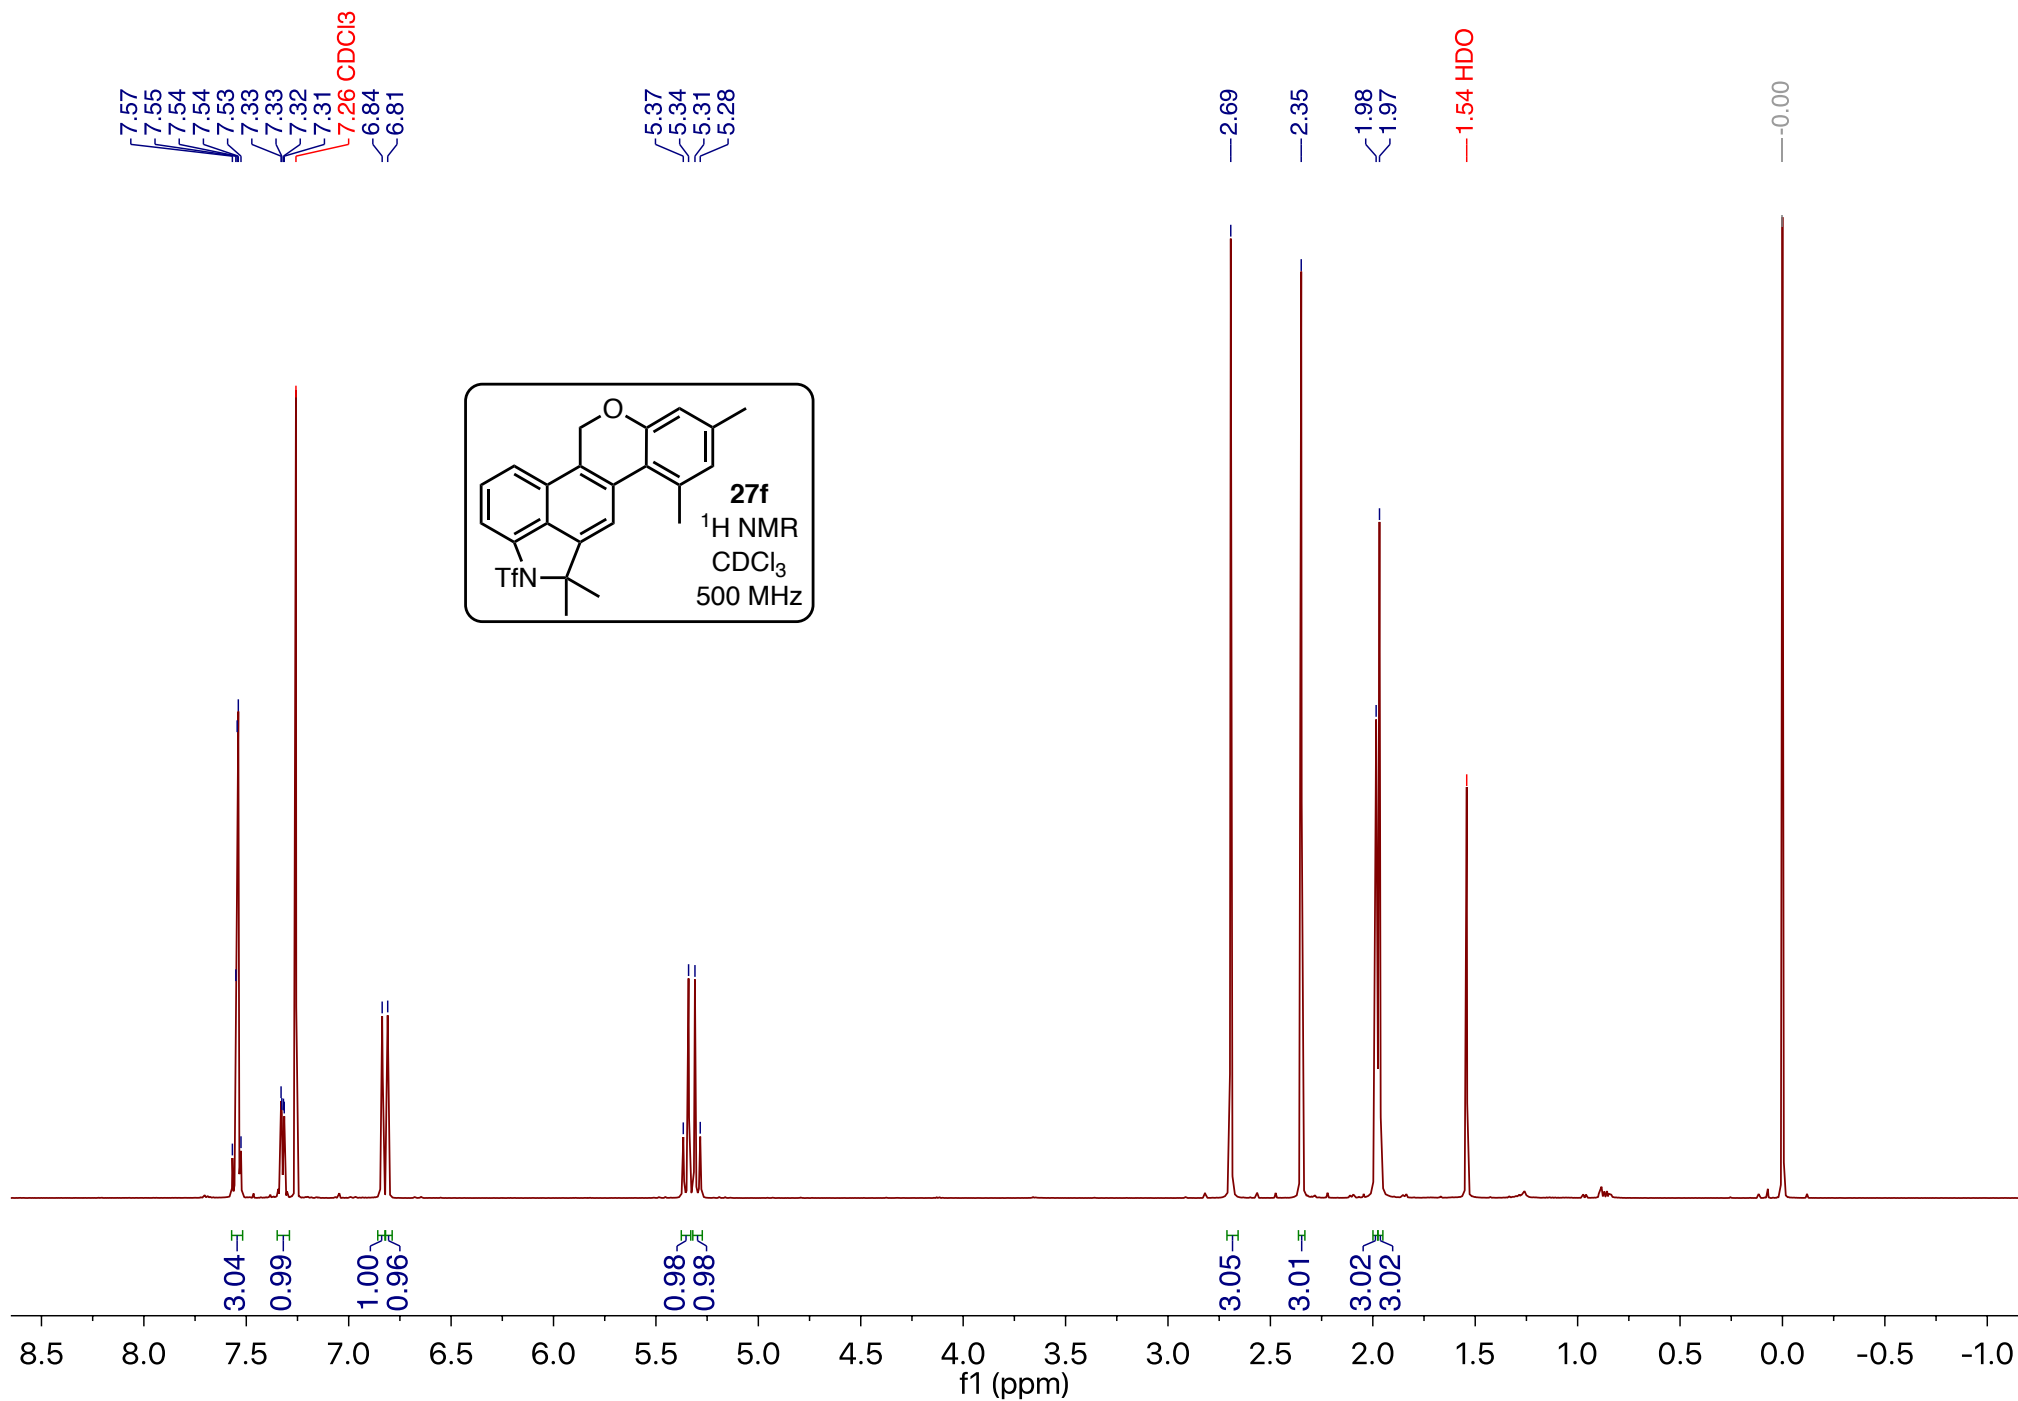

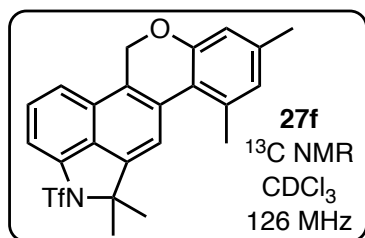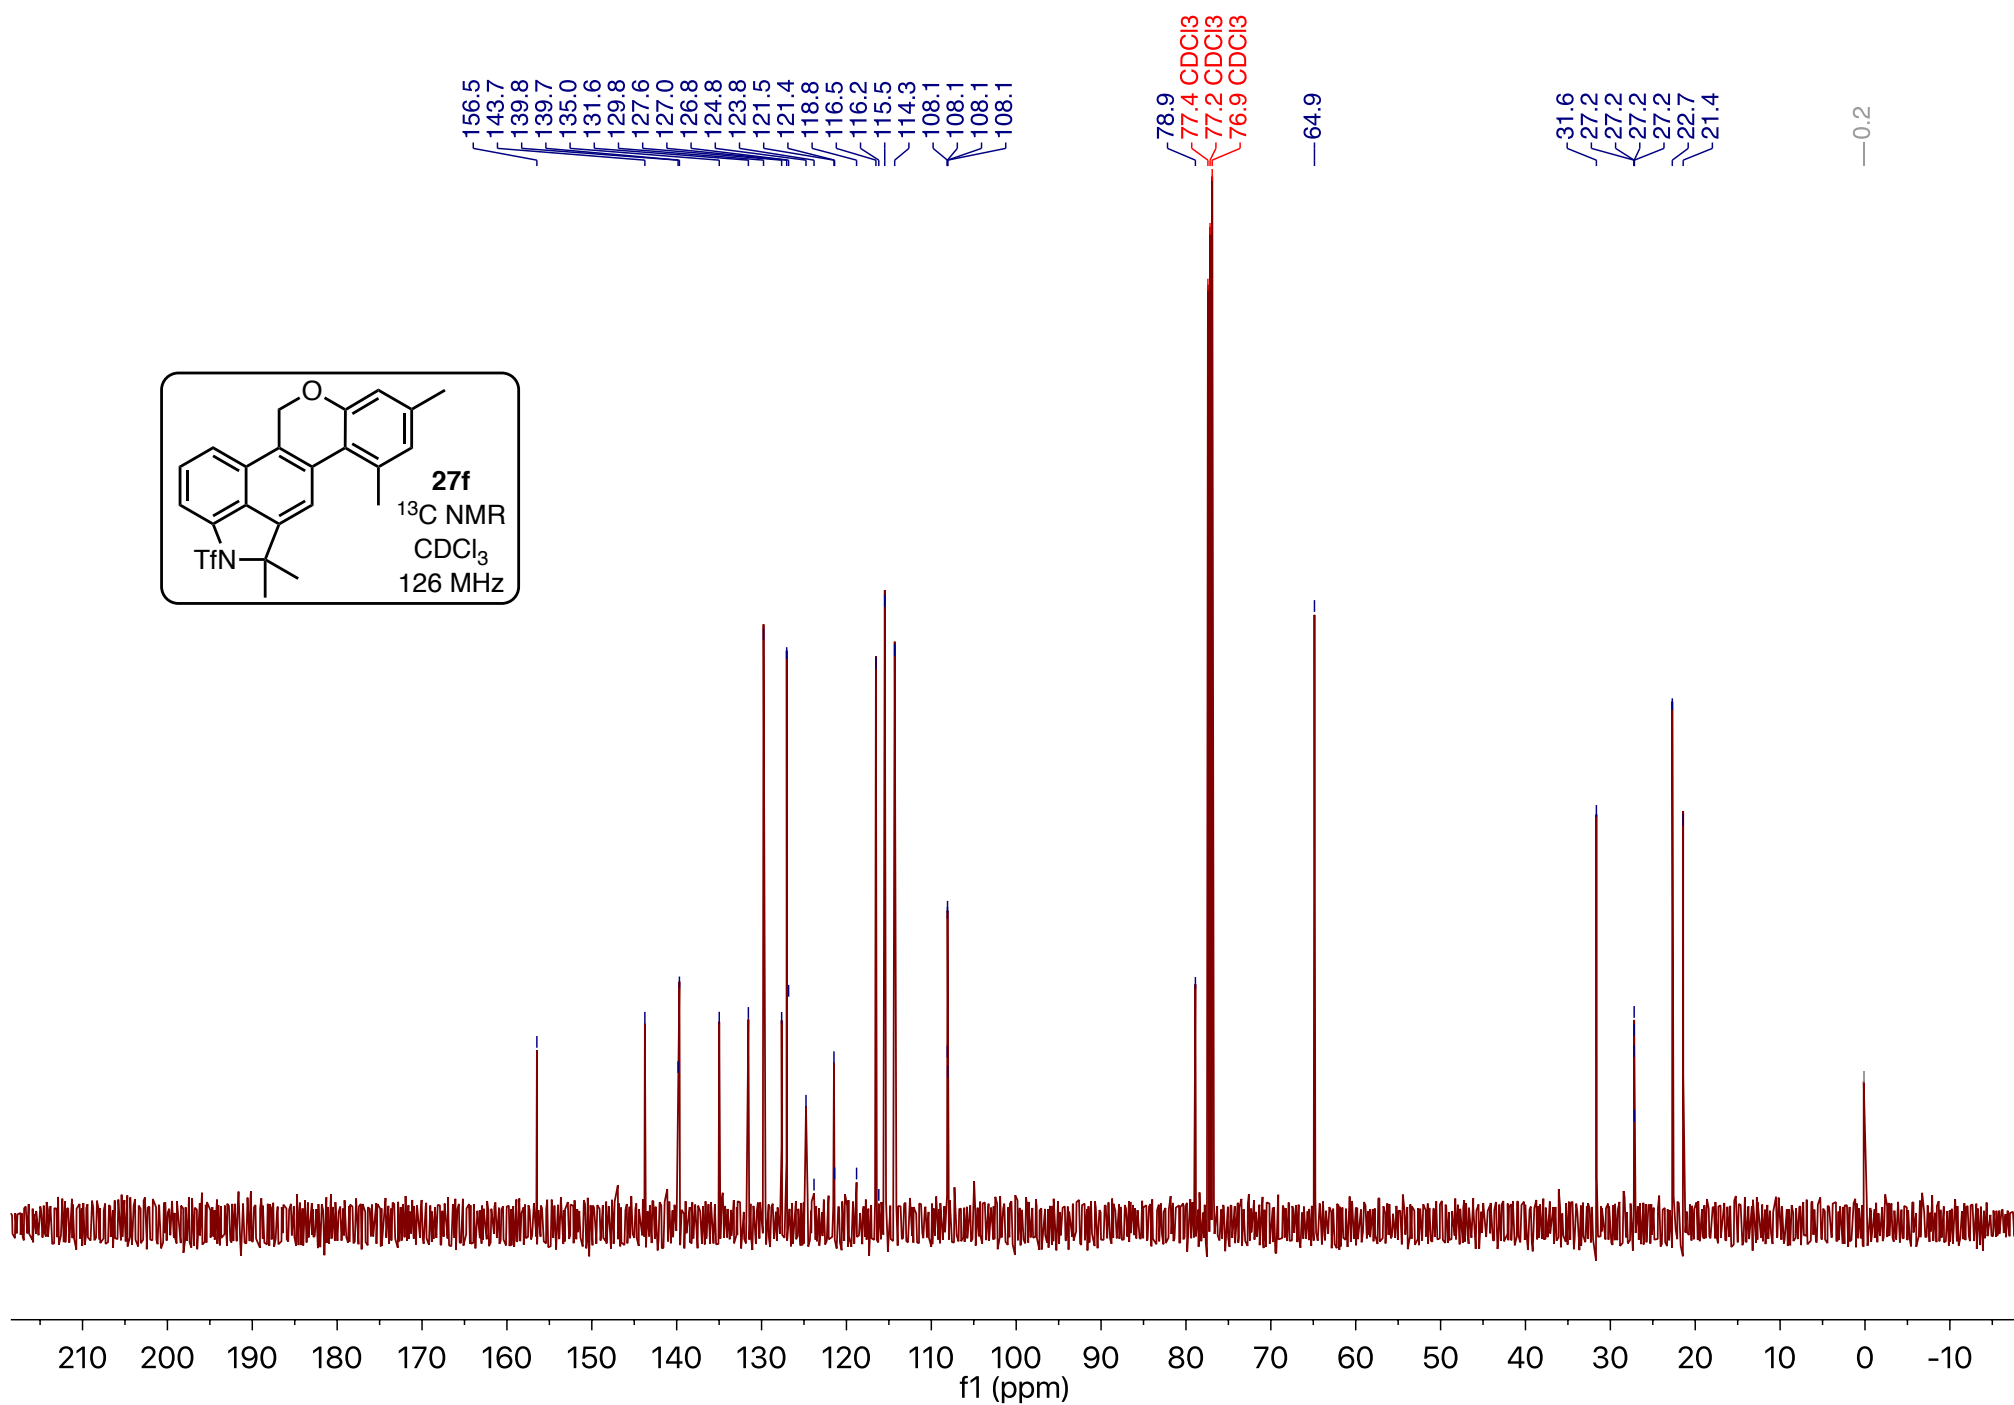

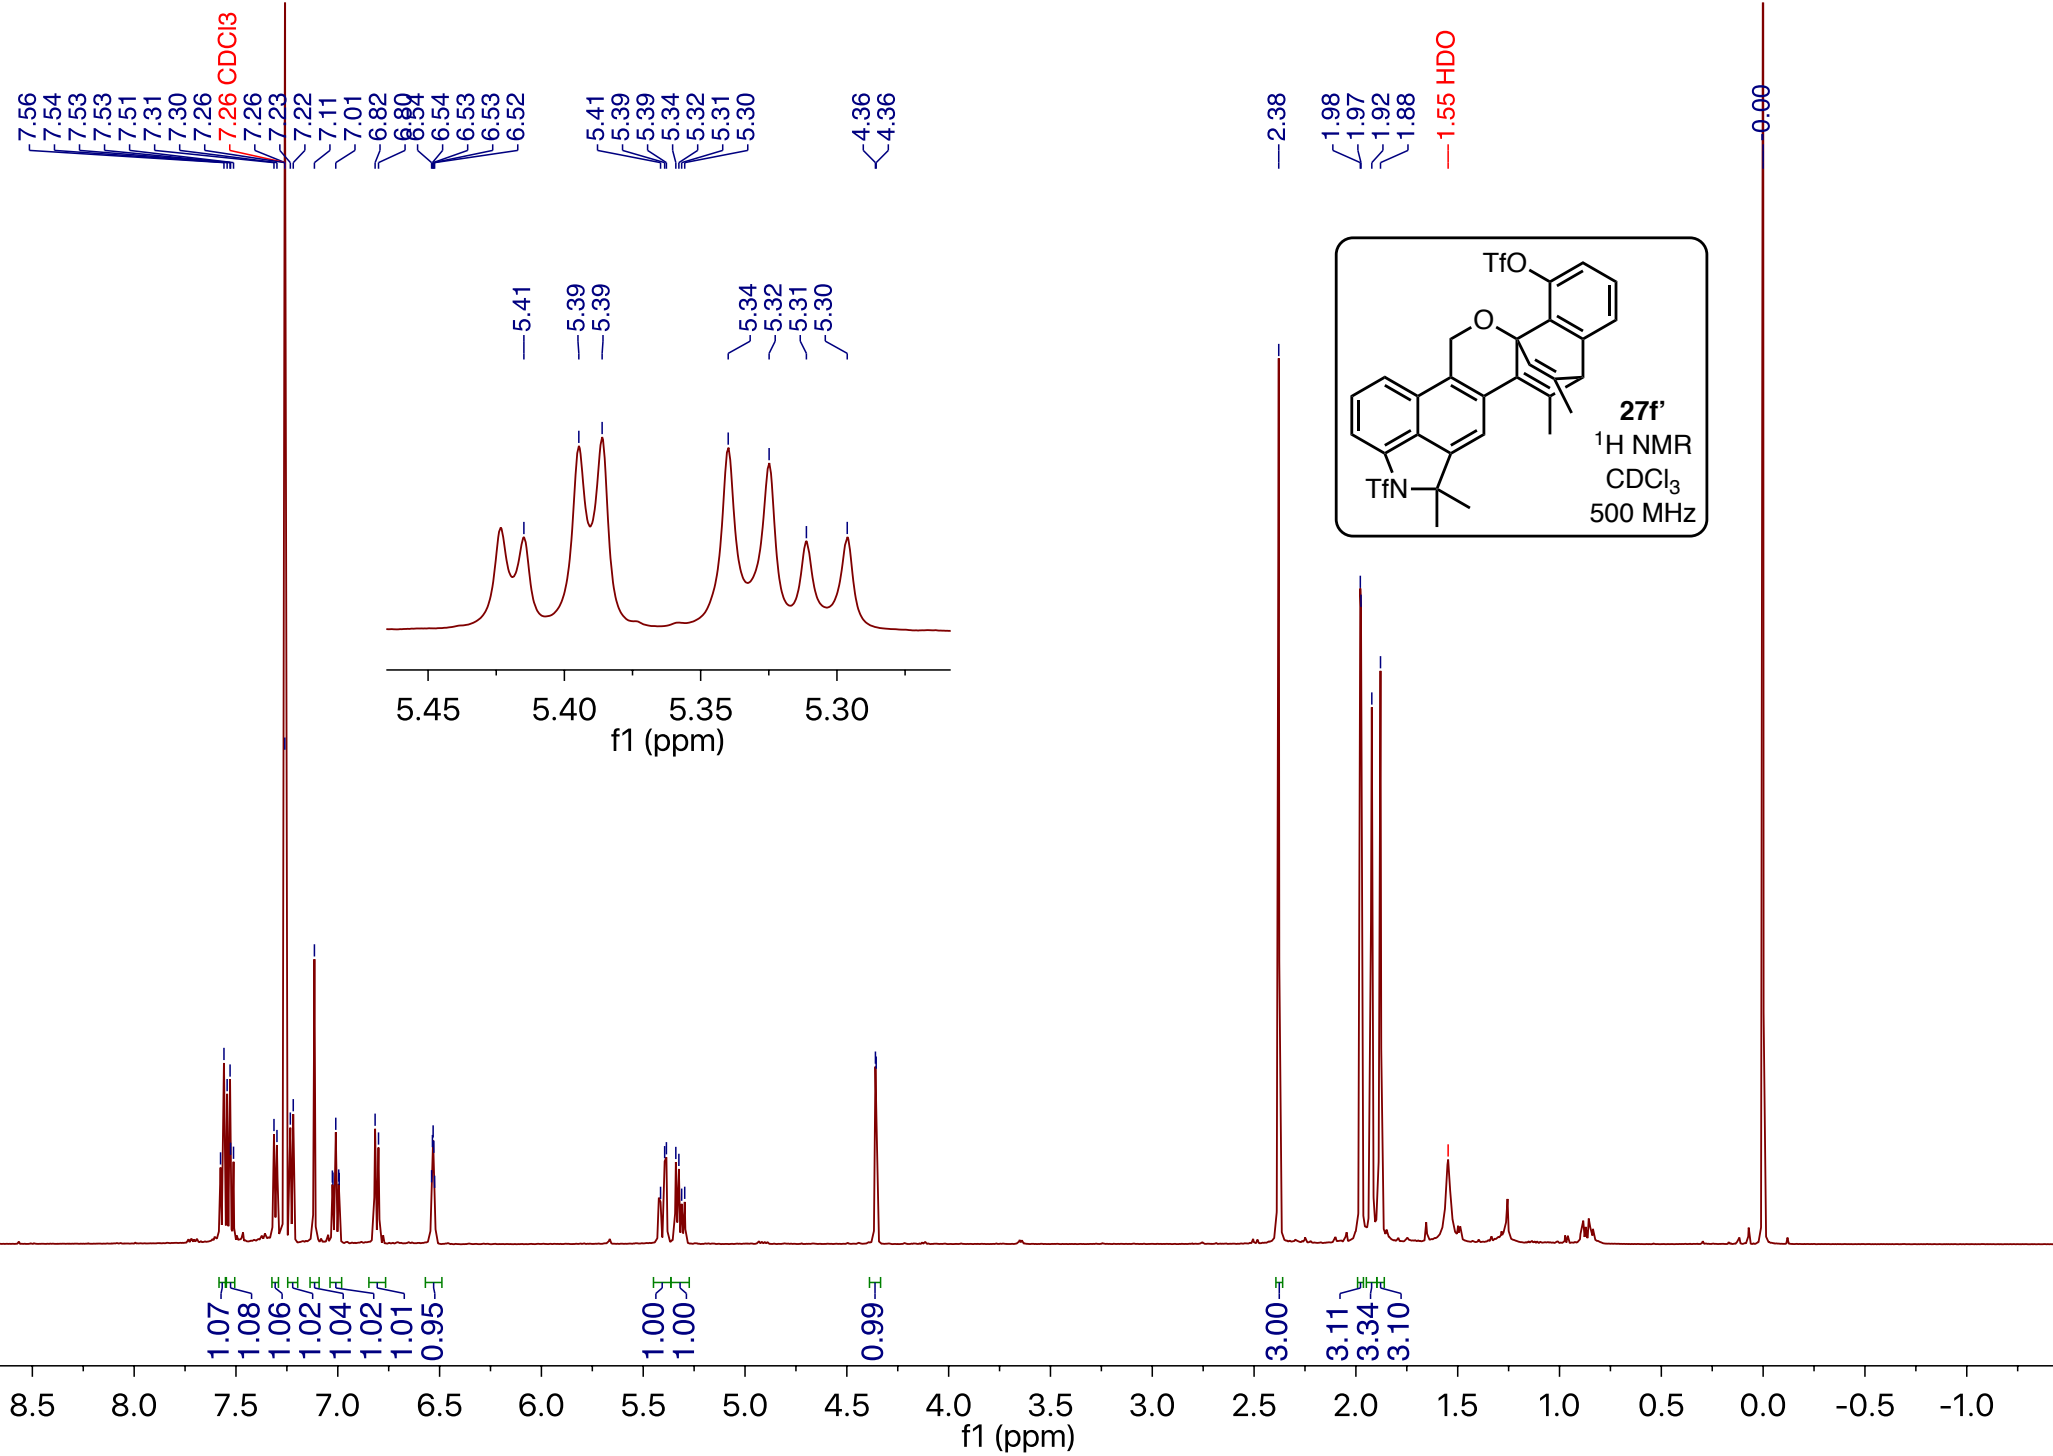

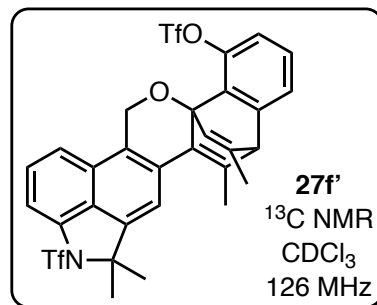

149.0  
148.9  
148.9  
143.5  
143.2  
143.1  
139.7  
138.1  
138.1  
134.1  
131.3  
130.3  
129.7  
129.4  
127.9  
126.0  
124.4  
121.6  
121.4  
120.2  
118.8  
118.6  
117.7  
116.7  
114.2  
108.3

87.9

78.7

77.4 CDCl<sub>3</sub>

77.2 CDCl<sub>3</sub>

76.9 CDCl<sub>3</sub>

62.8

61.8

61.7

31.7

31.5

27.2

27.2

27.2

27.1

27.1

27.1

20.1

19.6

0.1

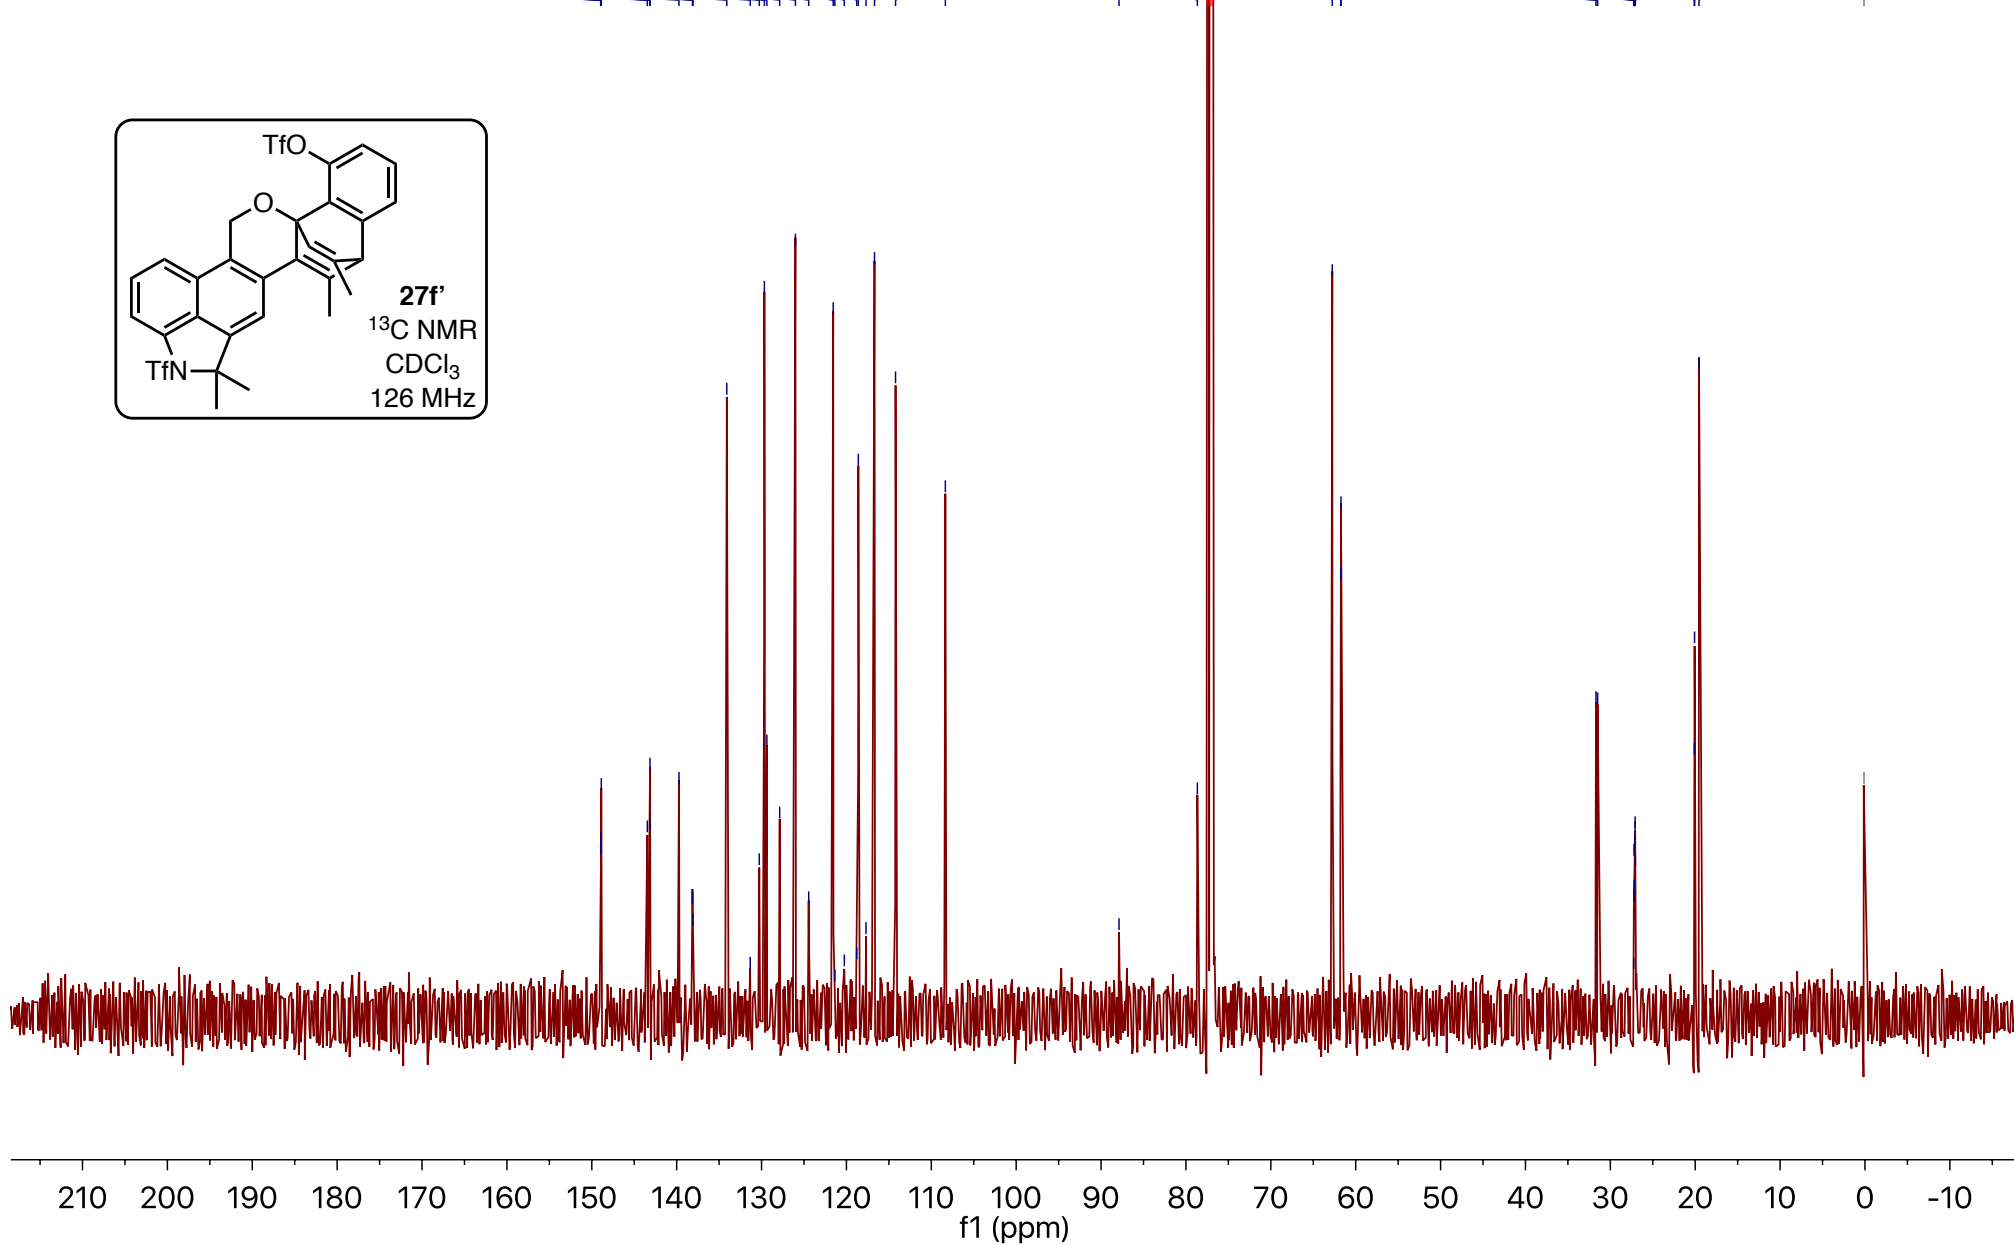

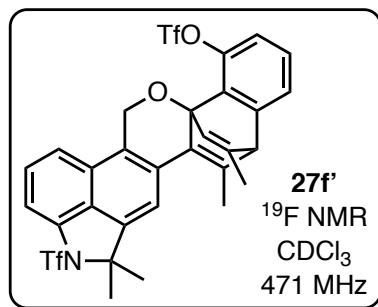

-73.8  
-73.8  
-74.3  
-74.3

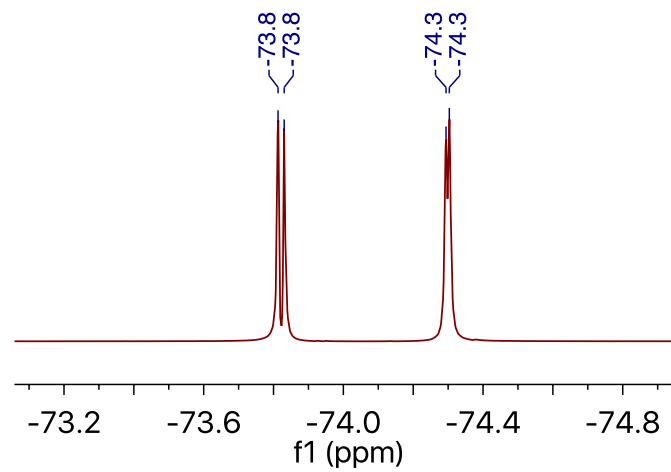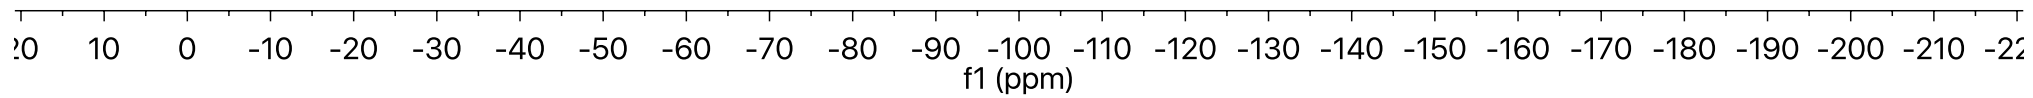

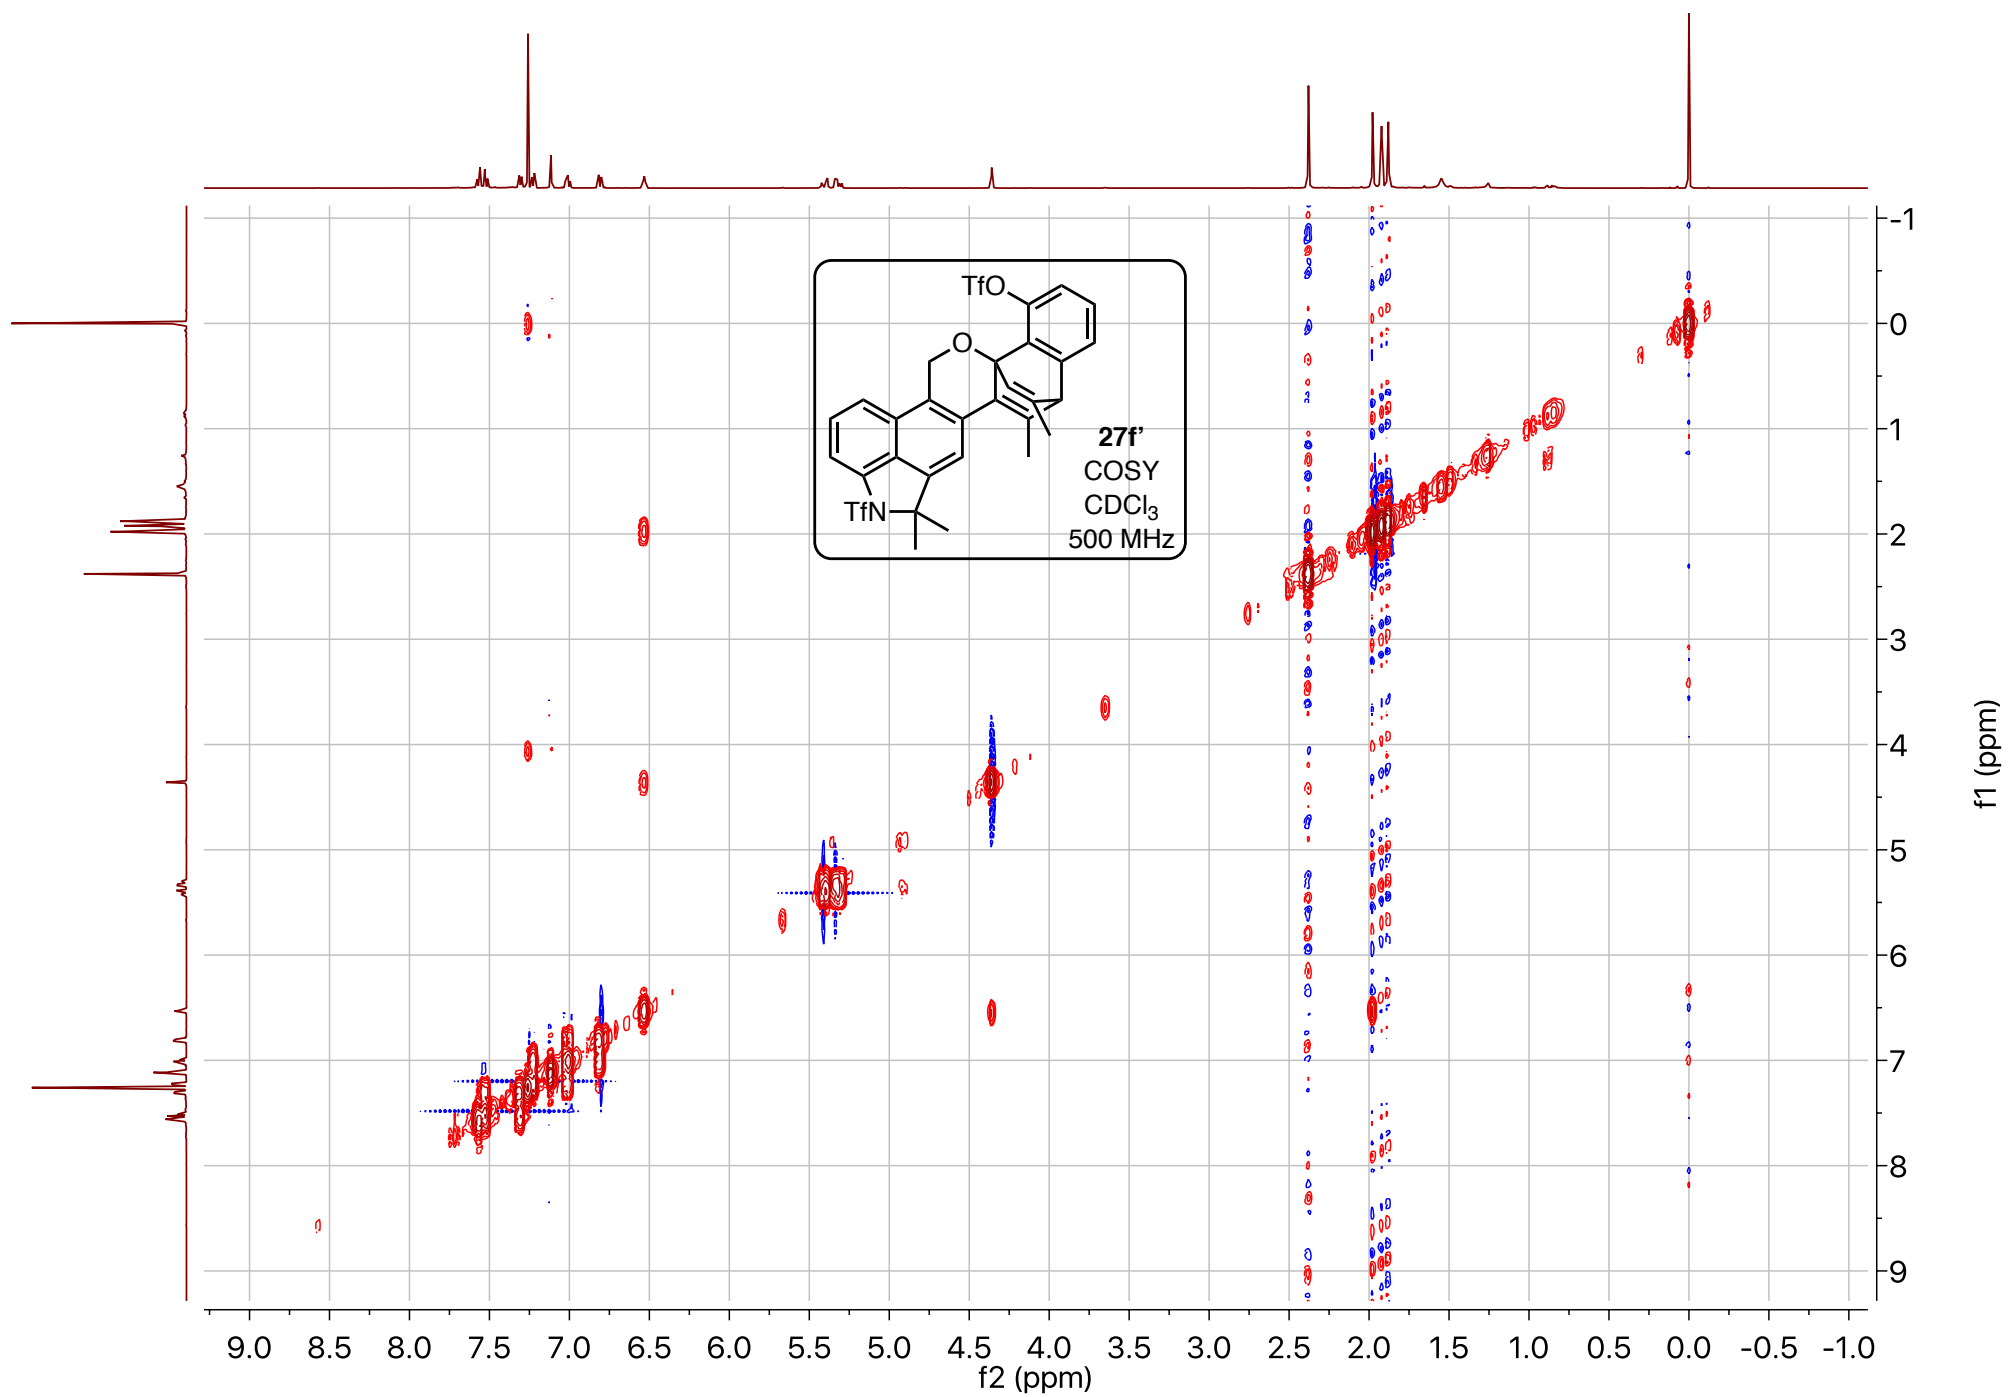

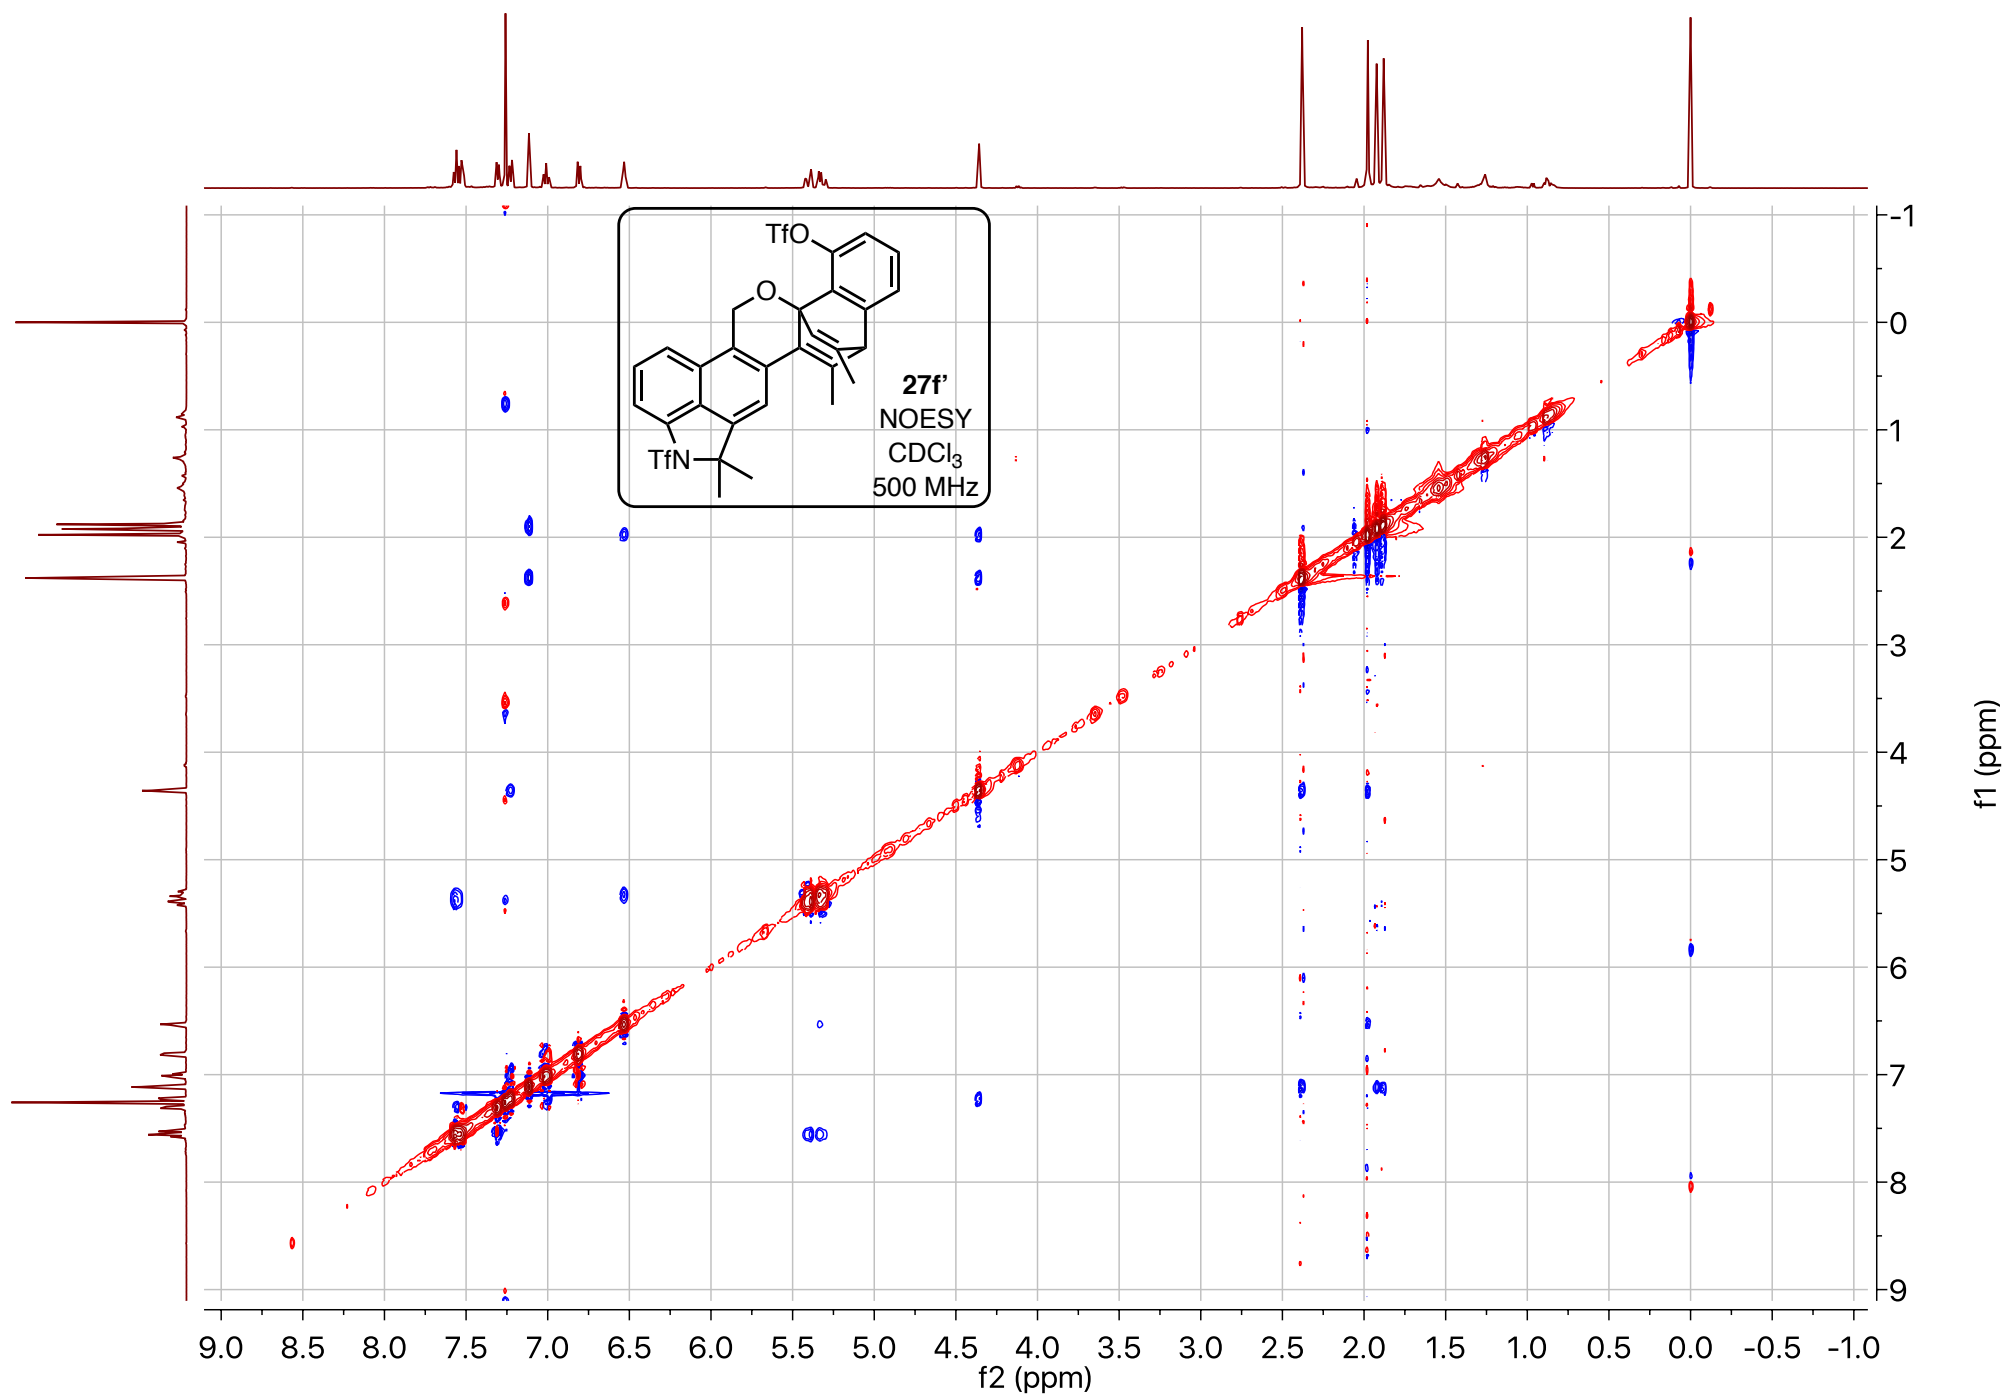





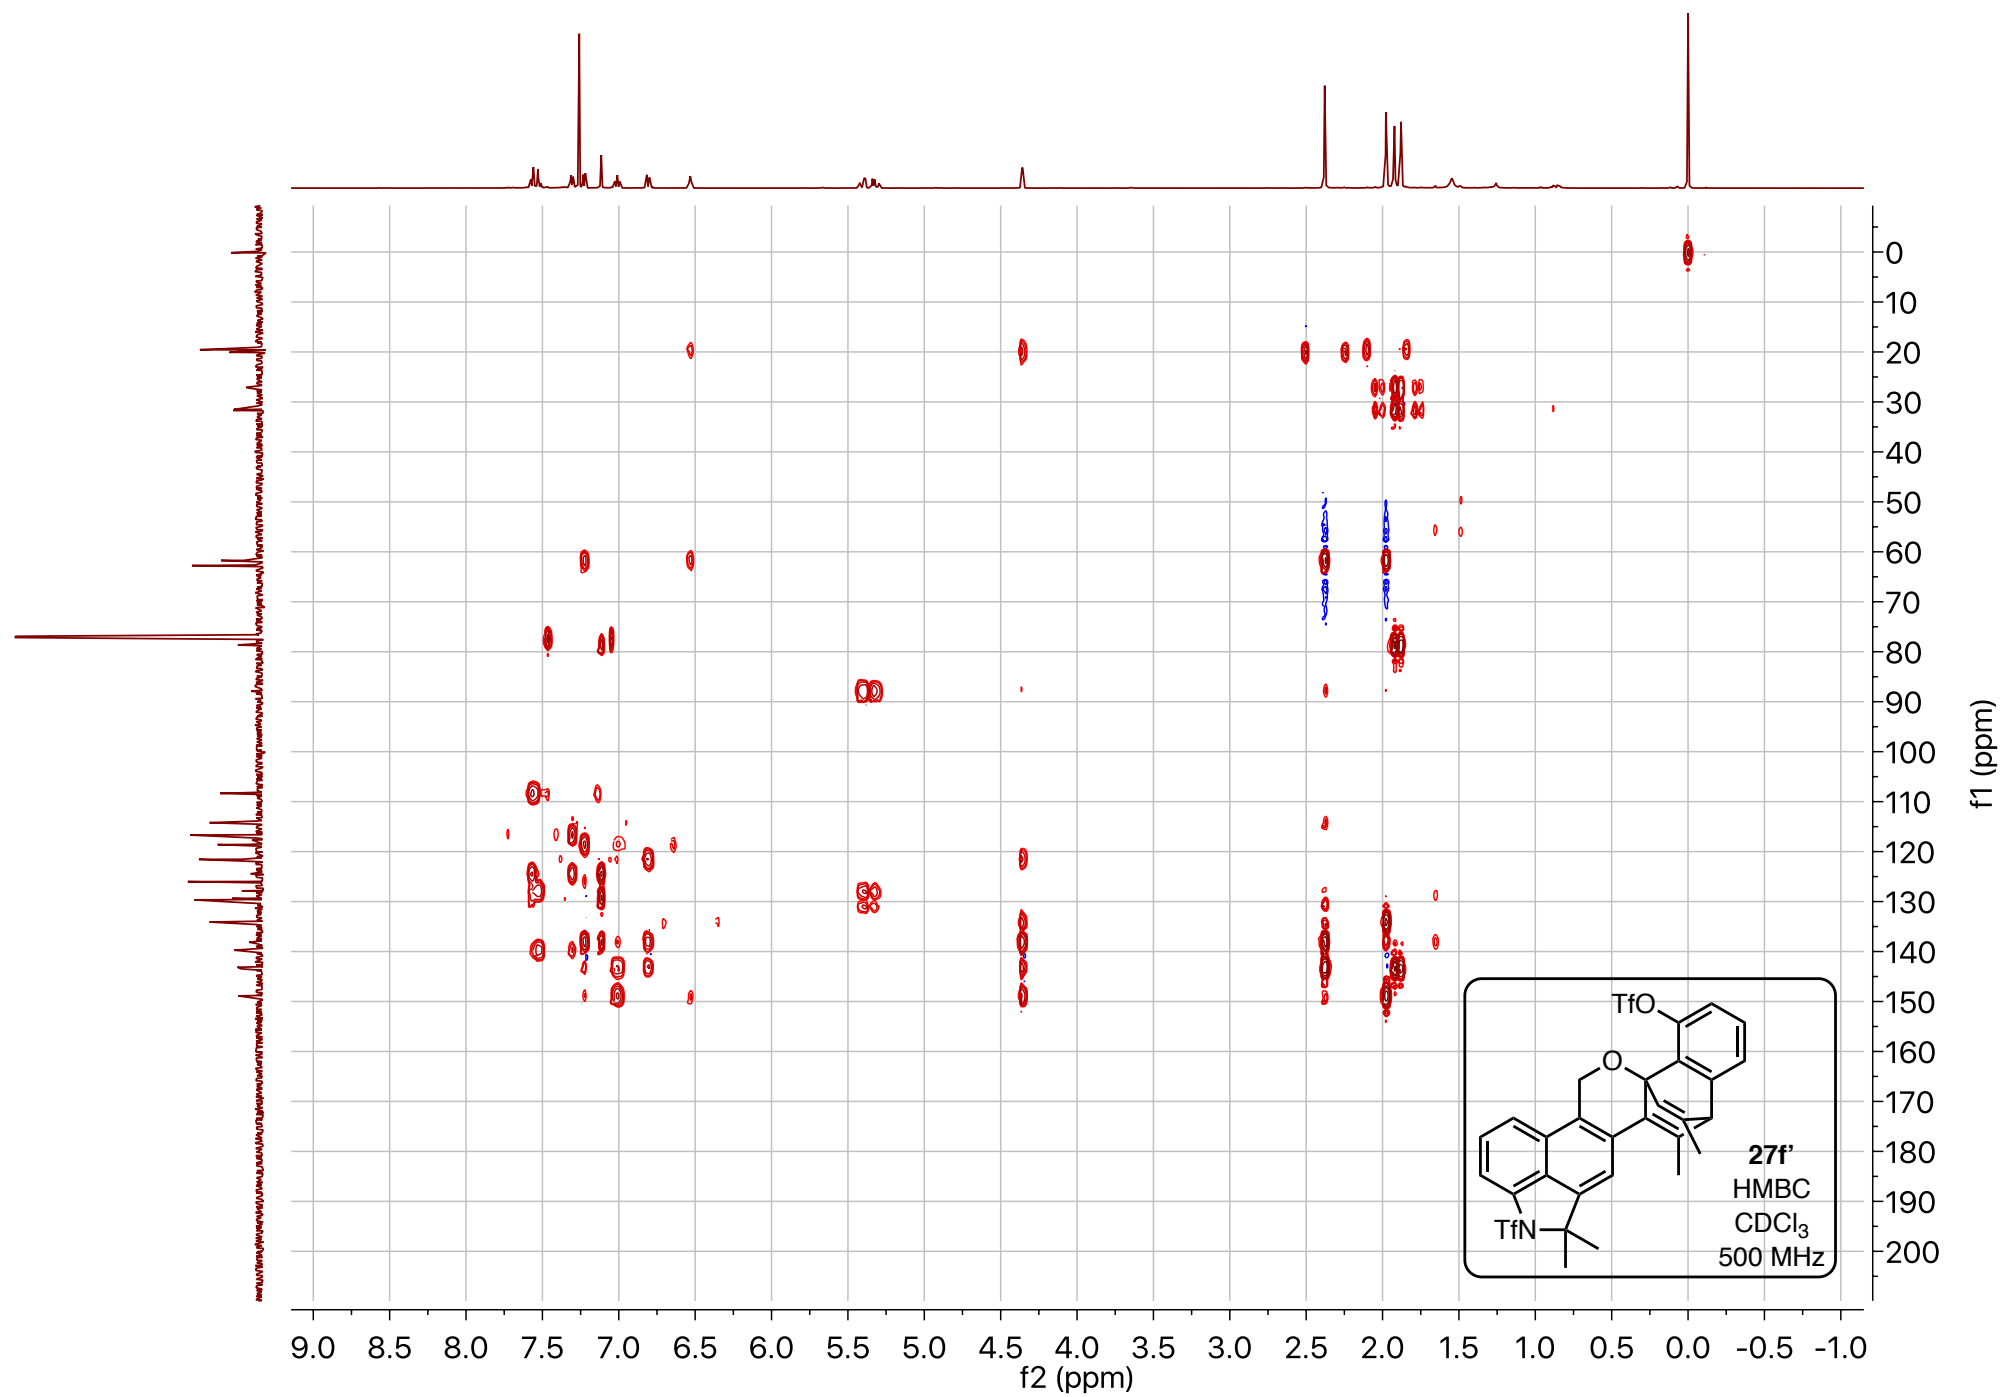

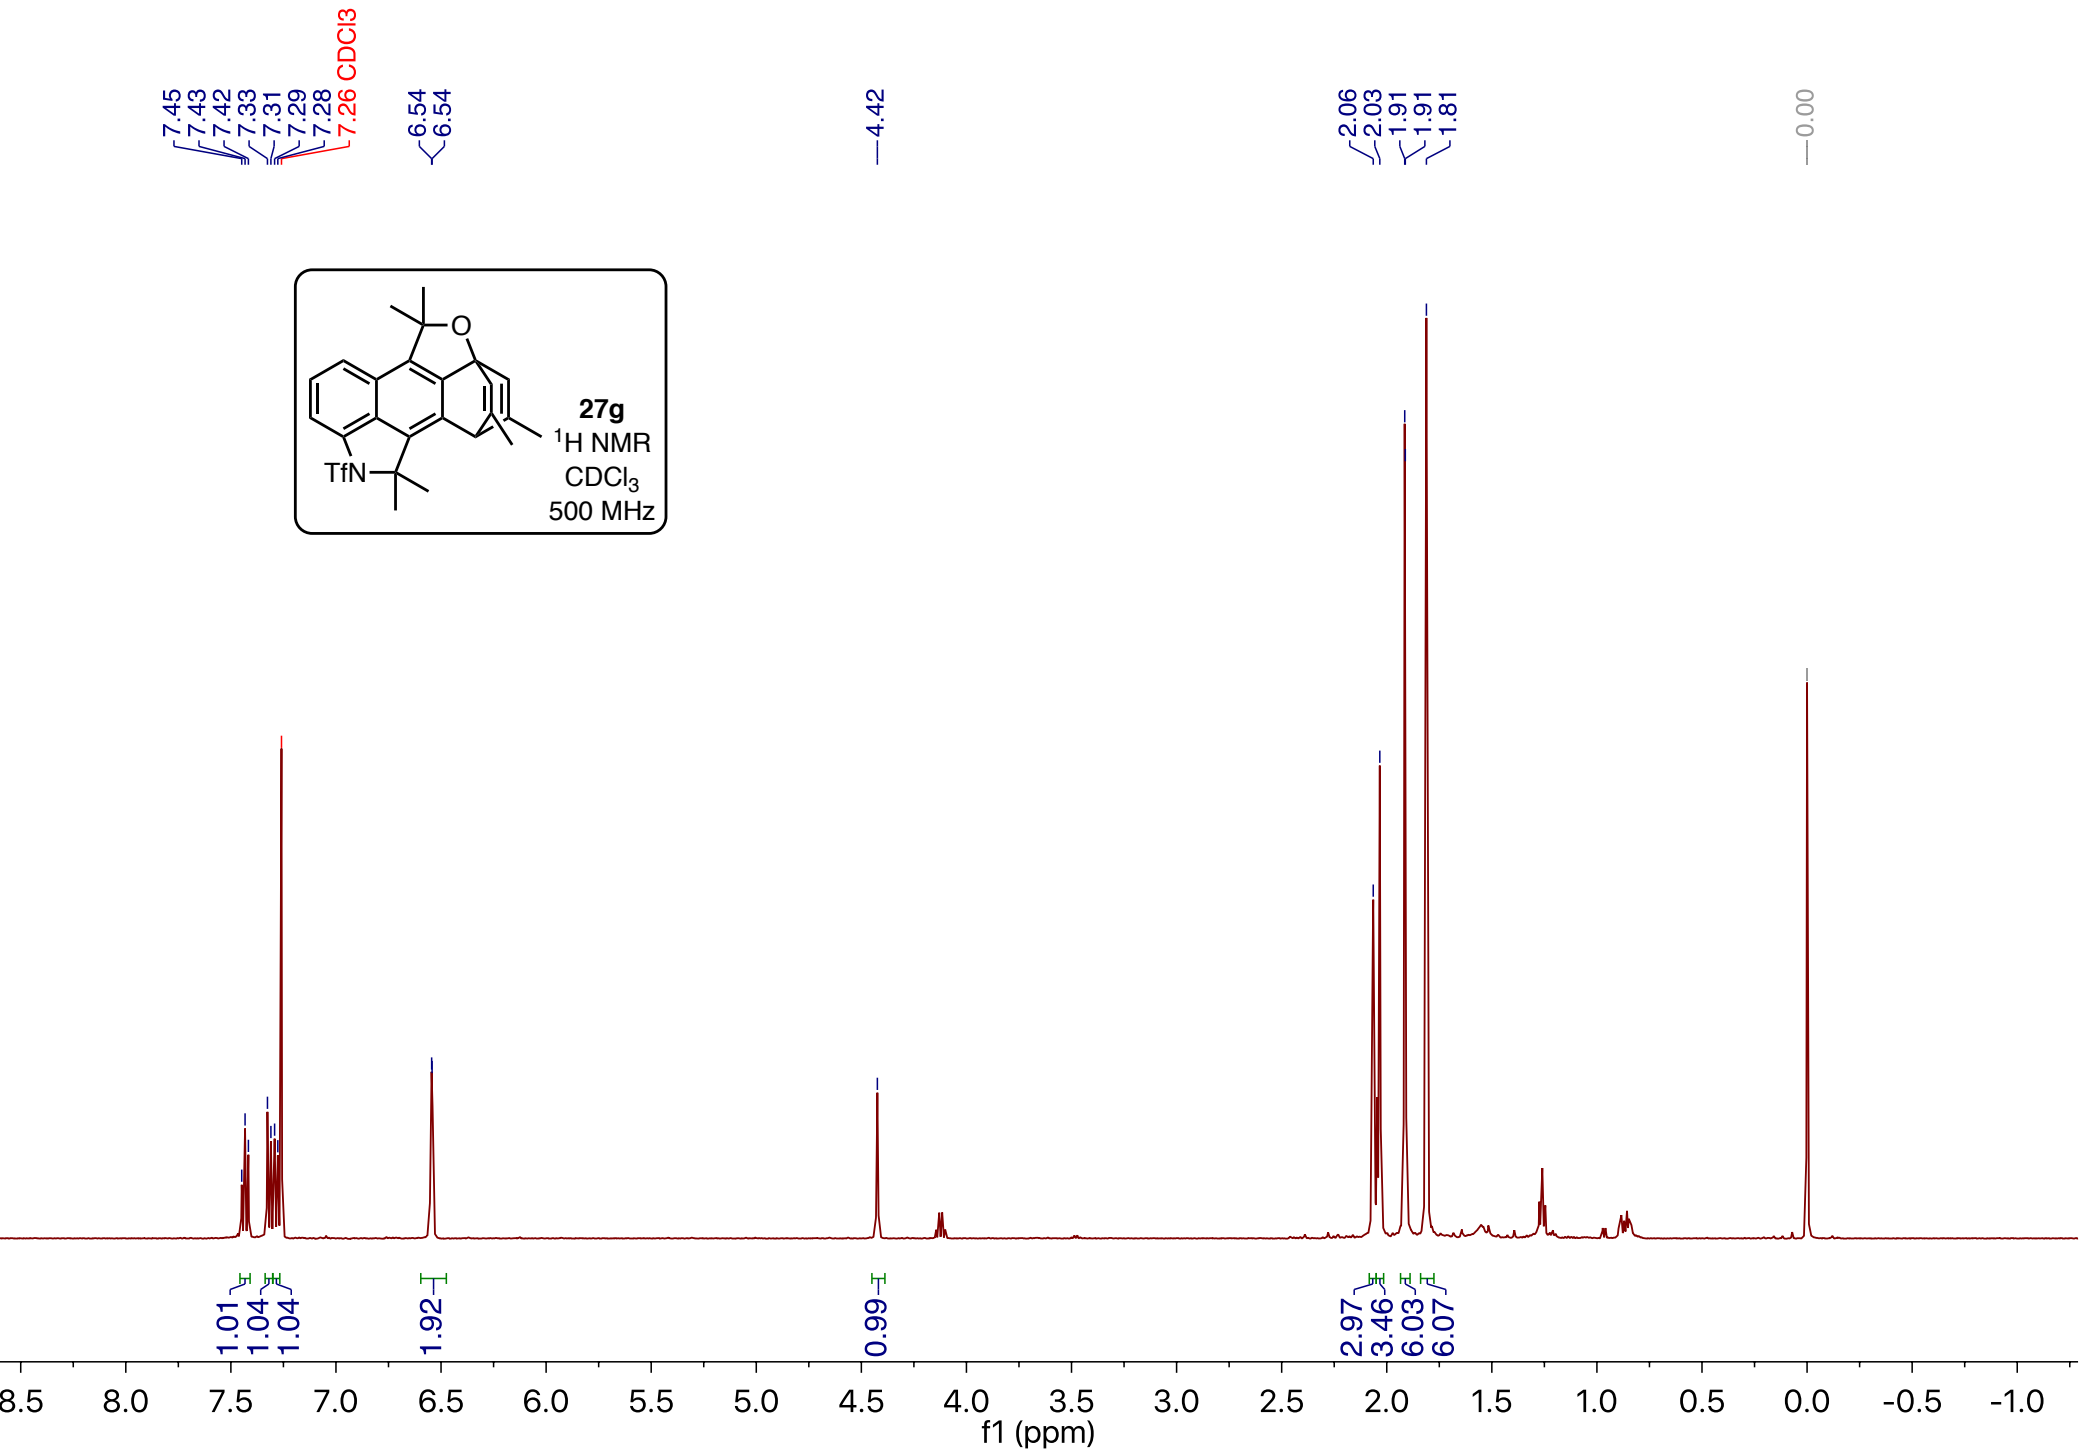

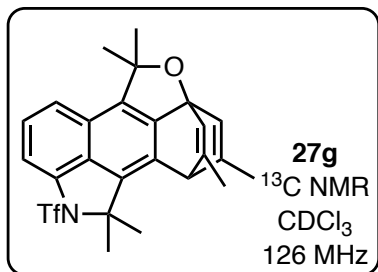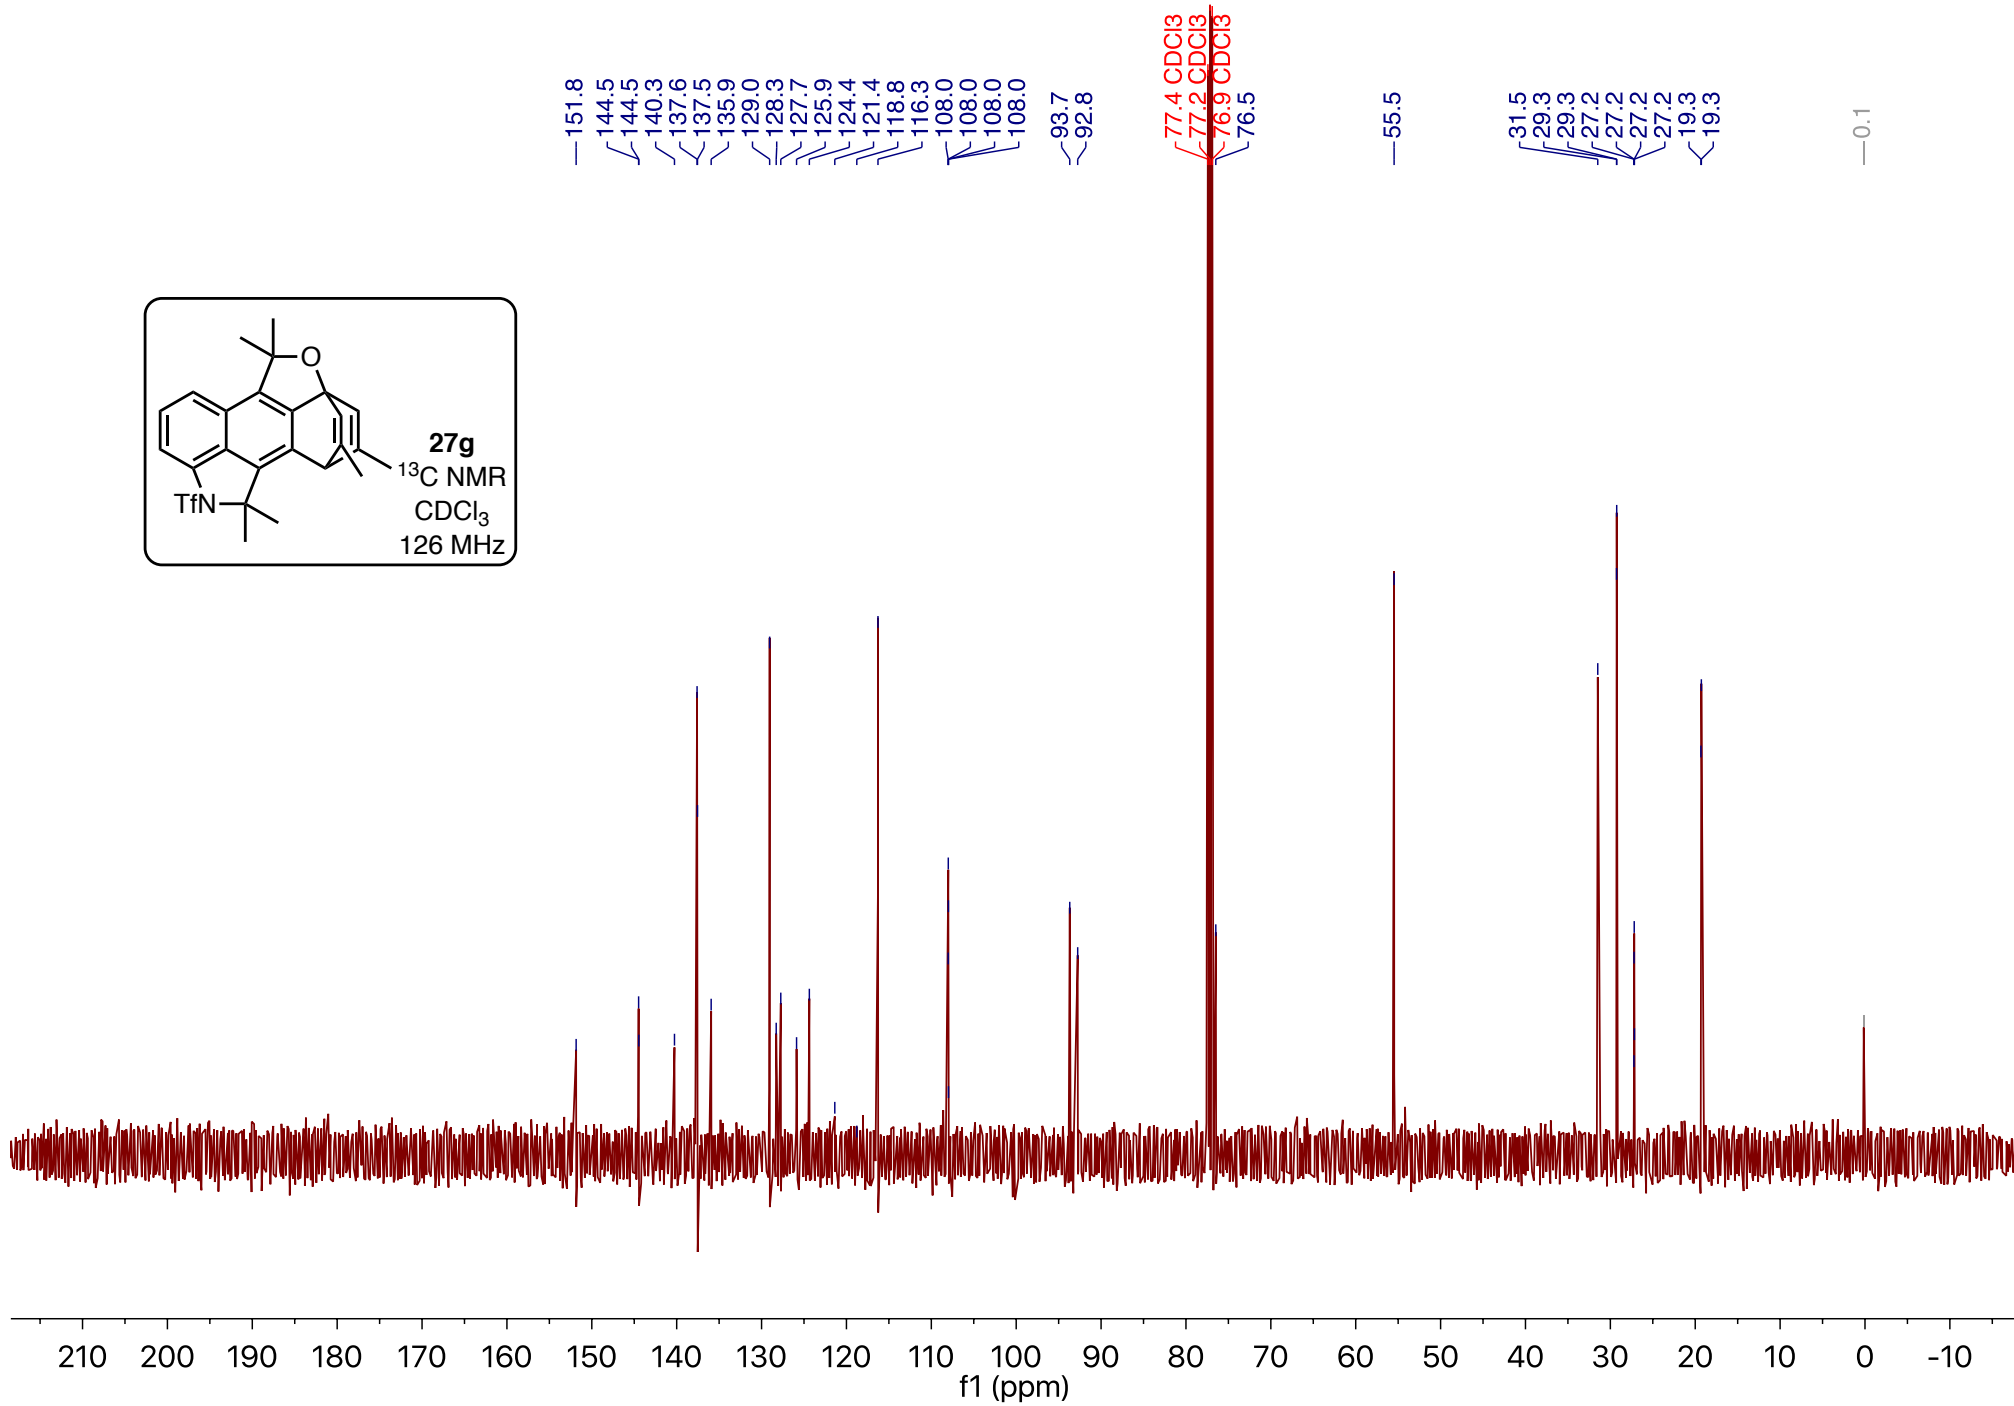

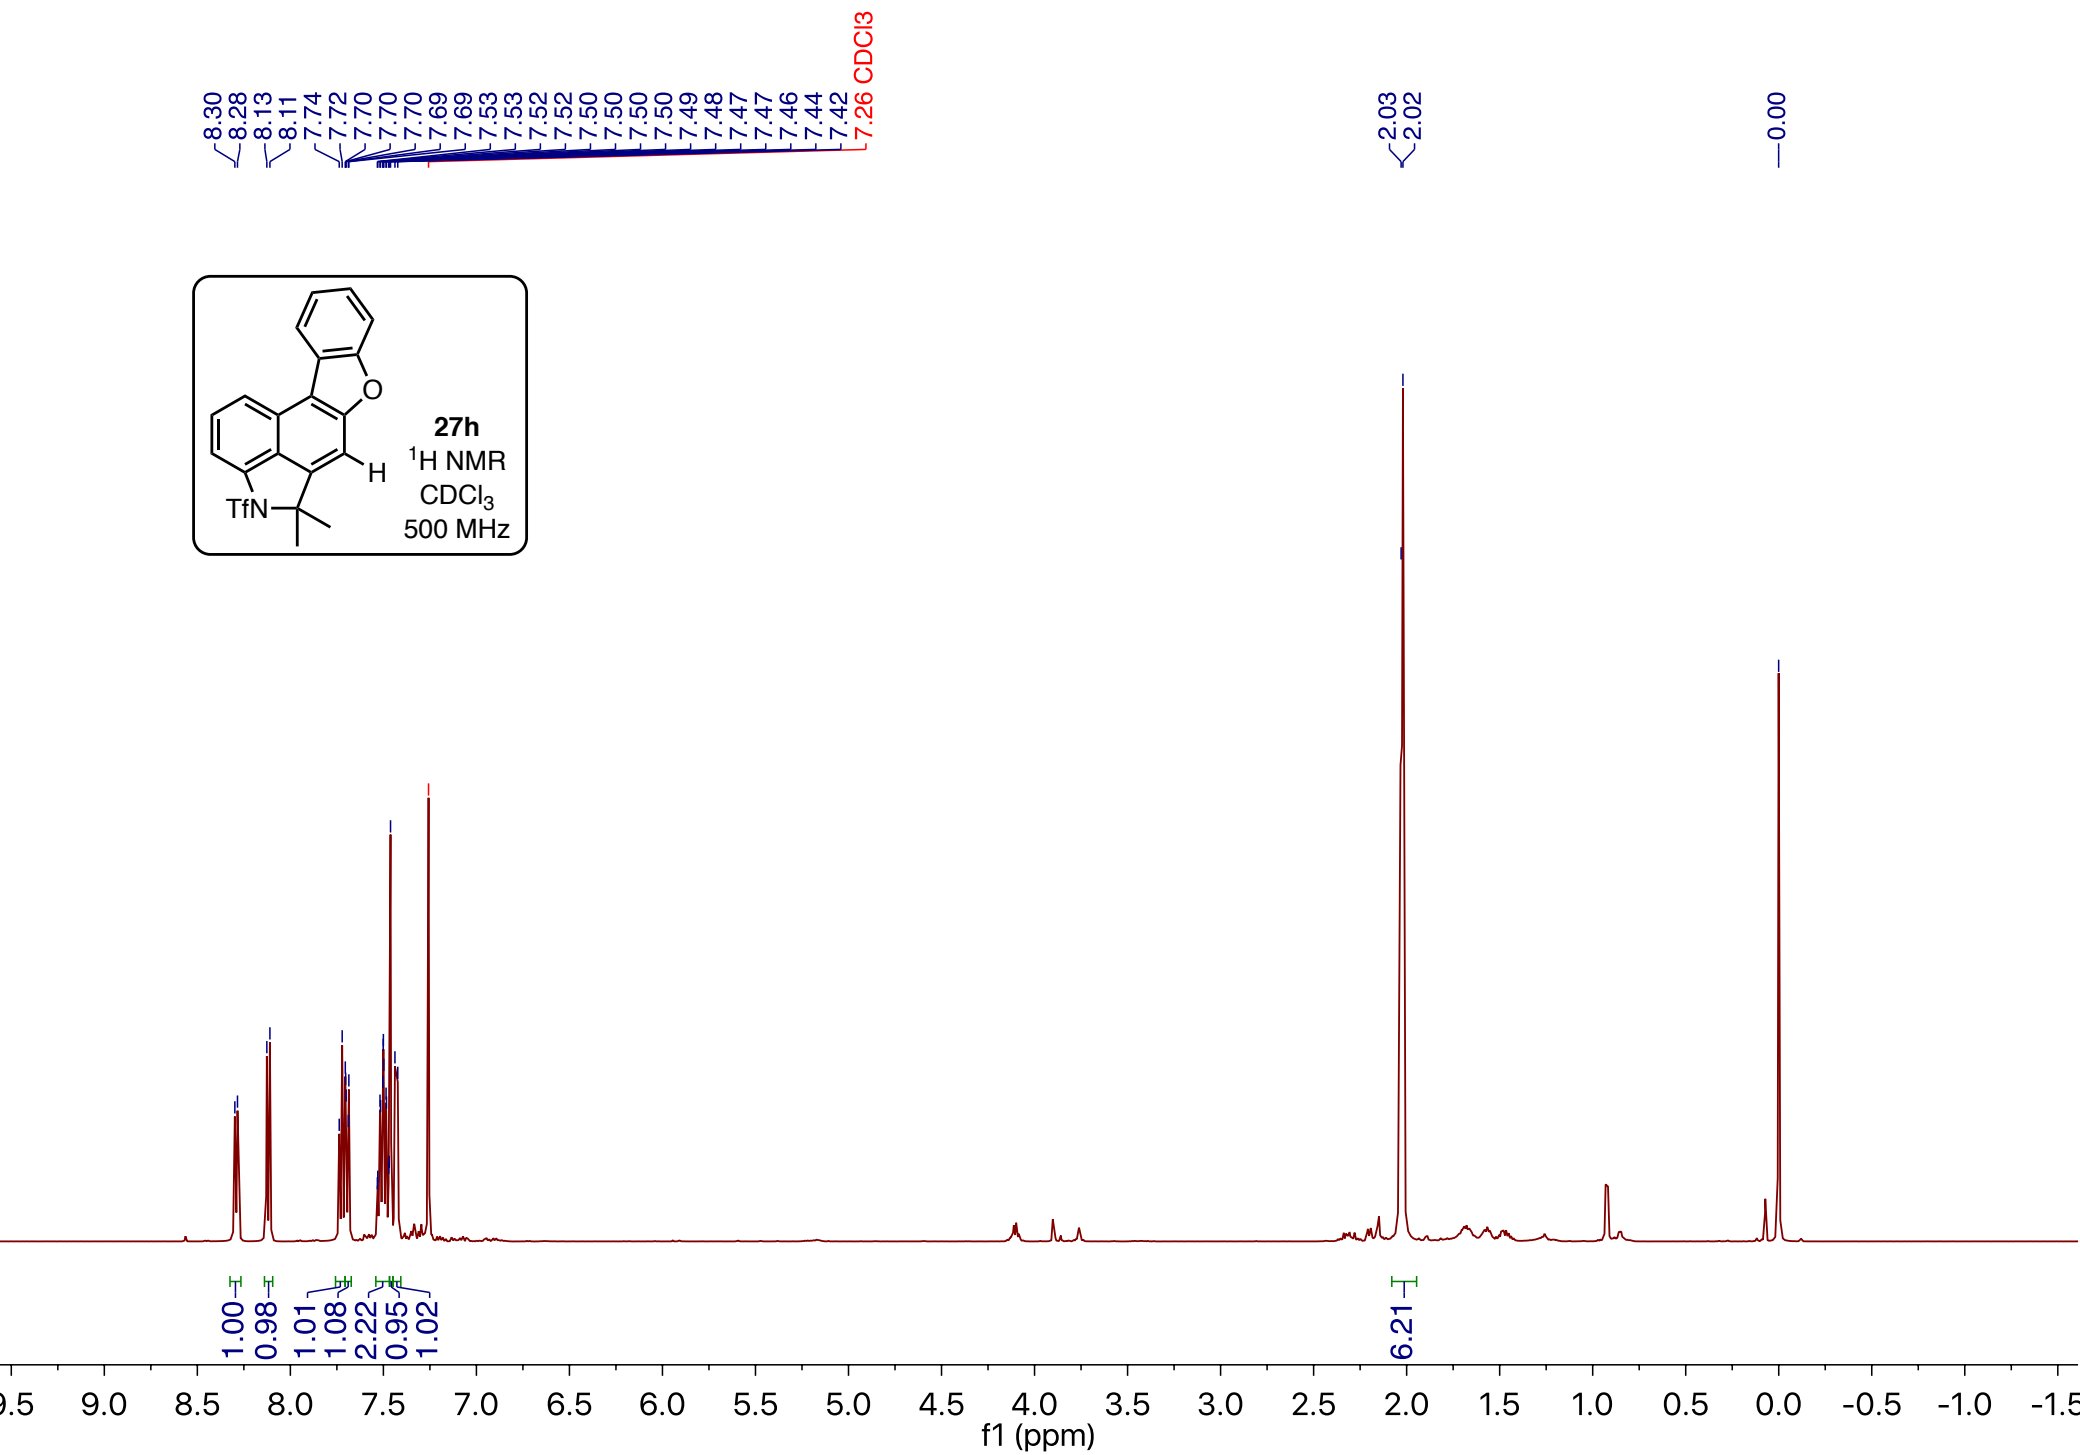

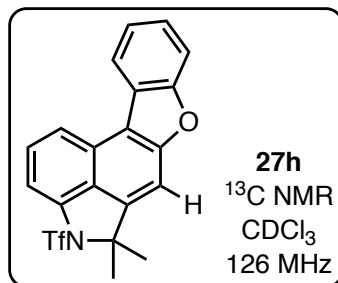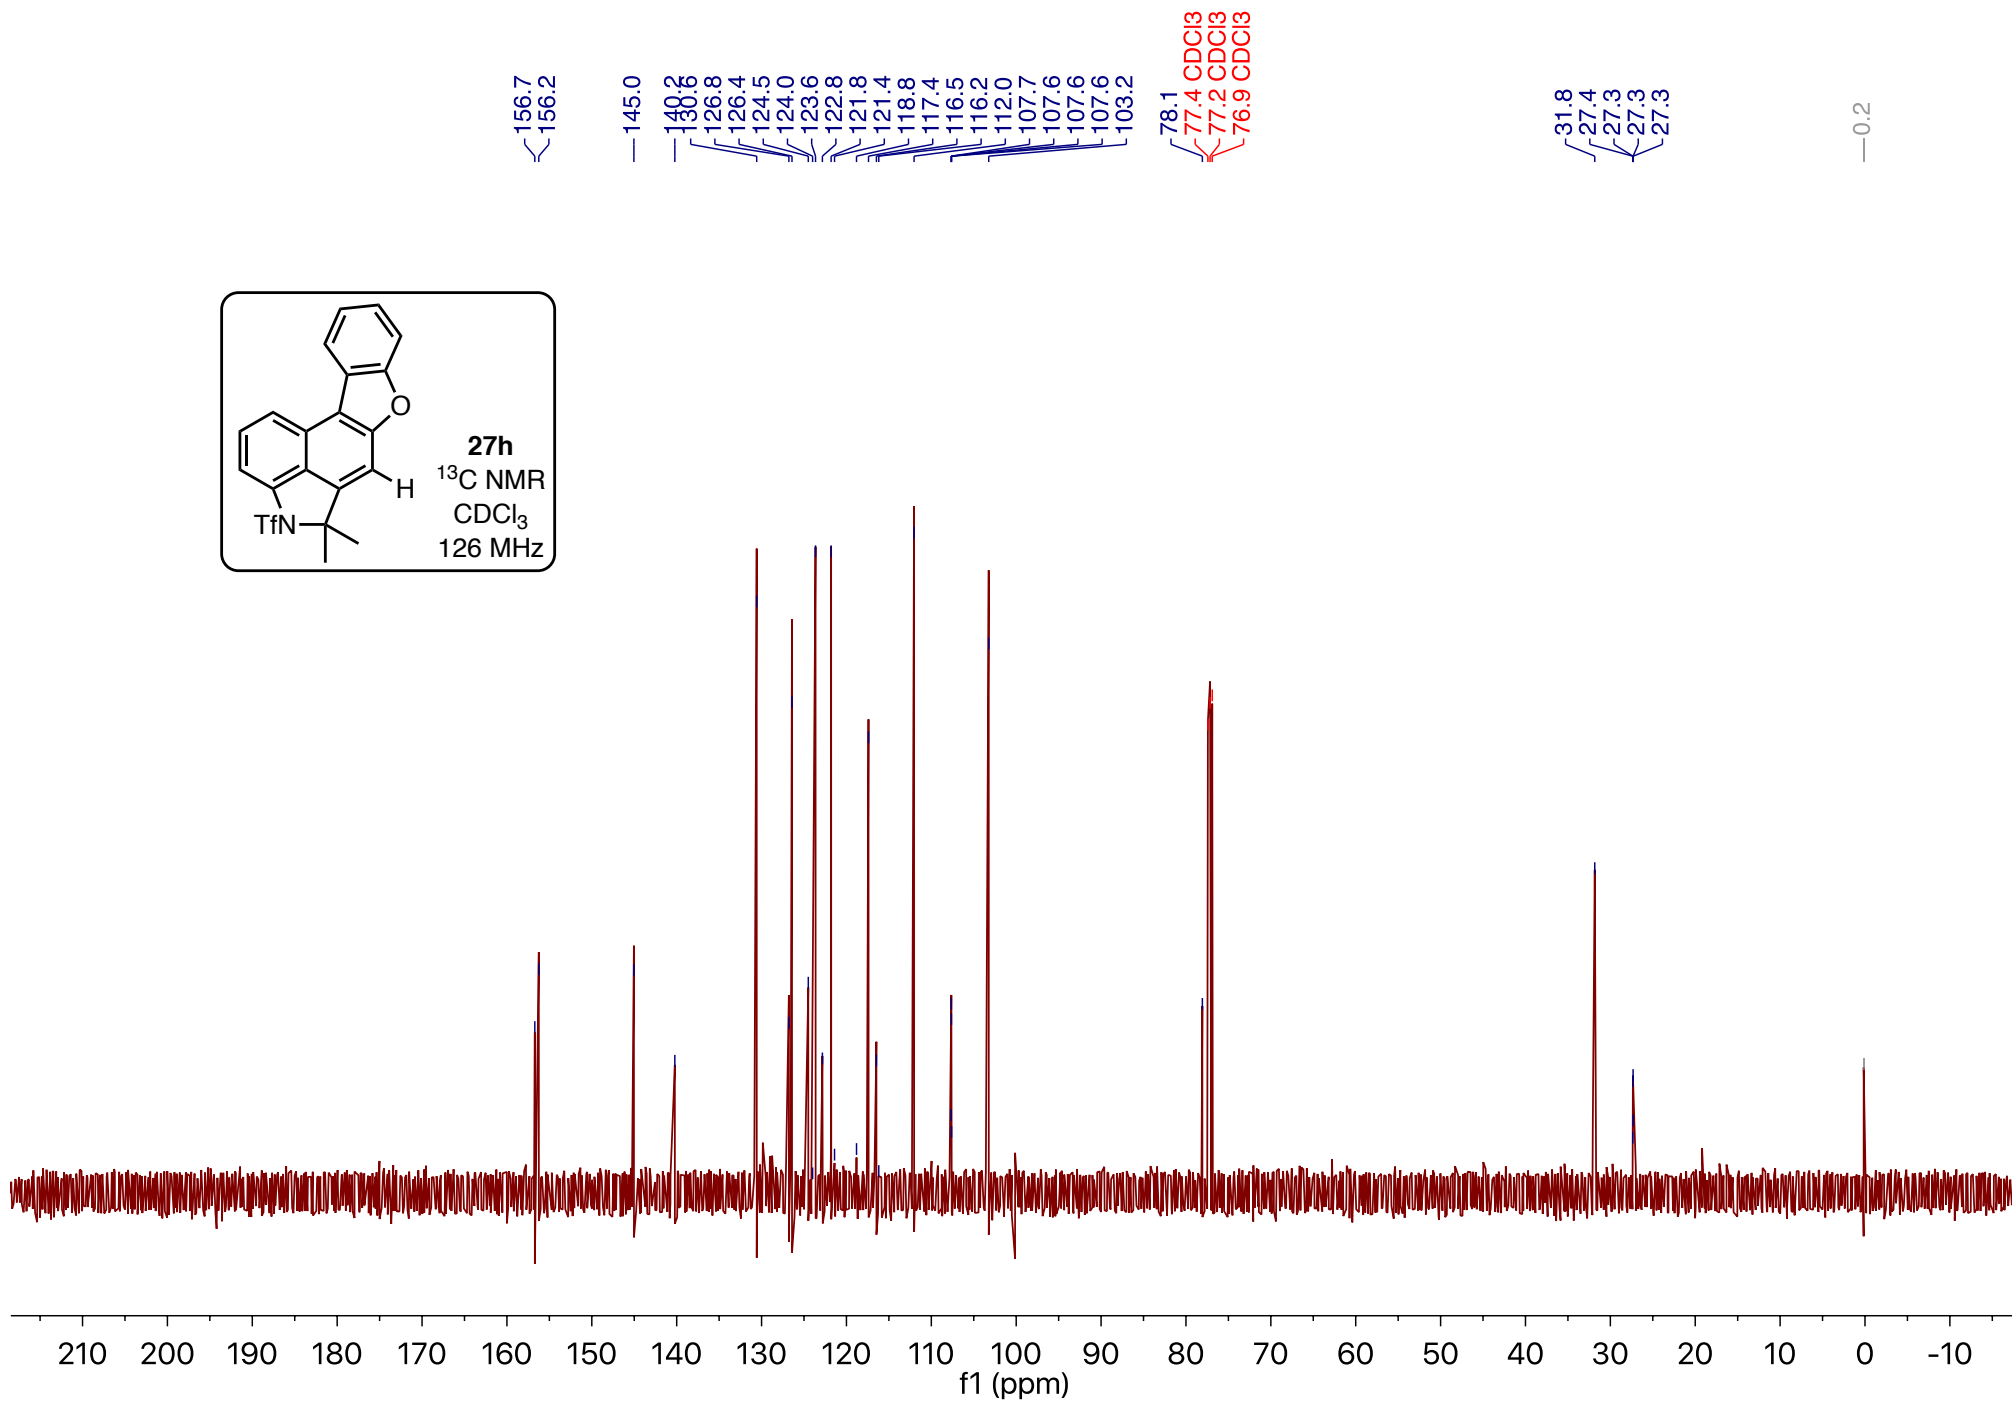

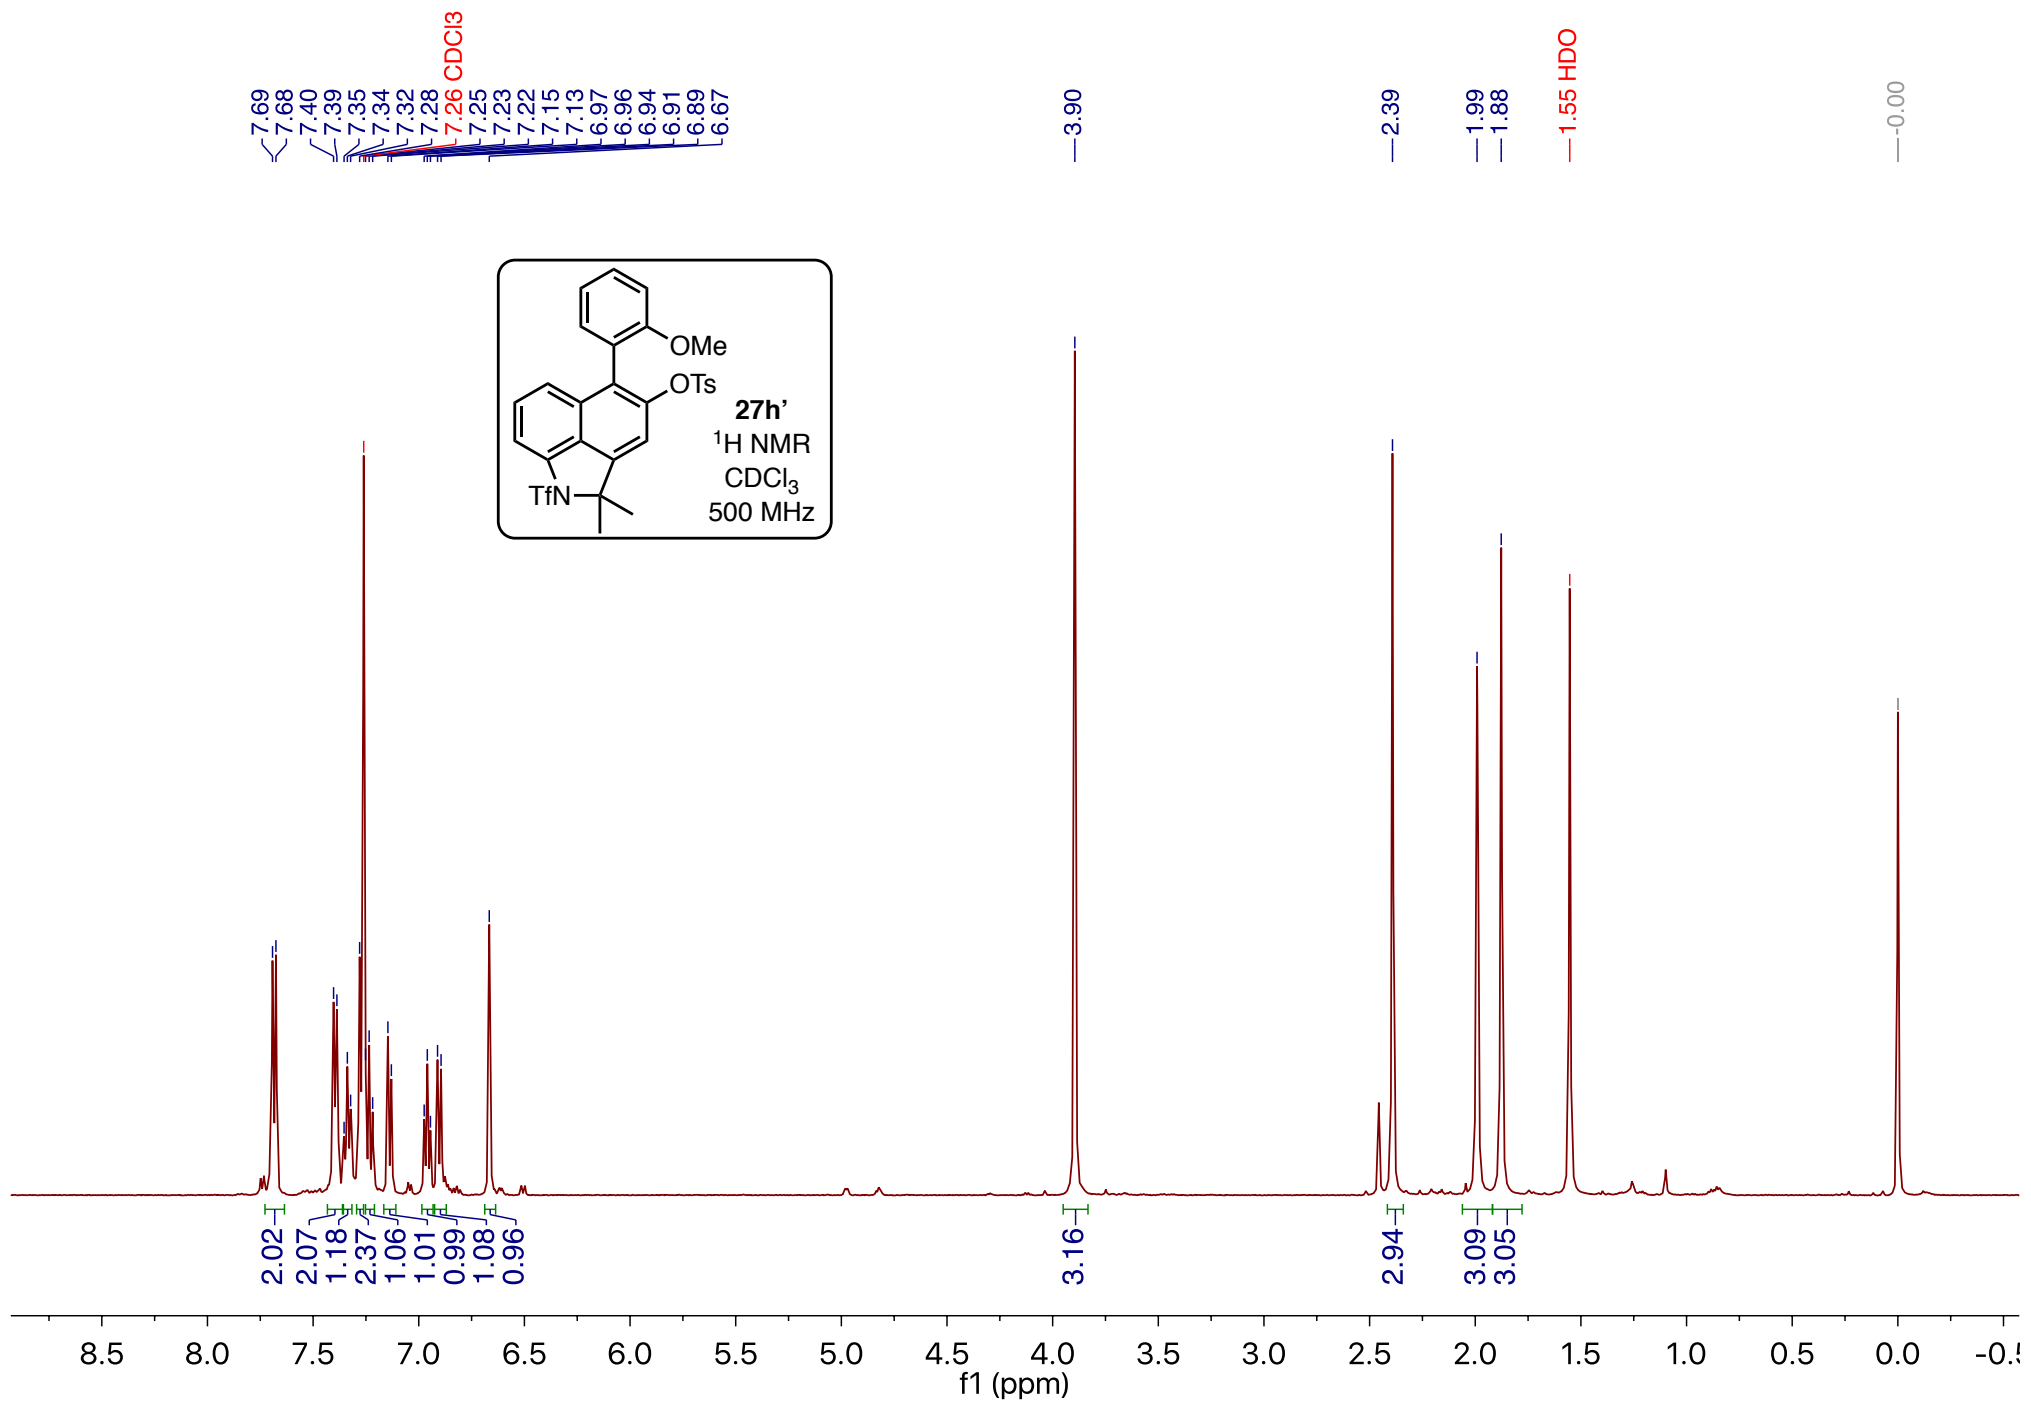

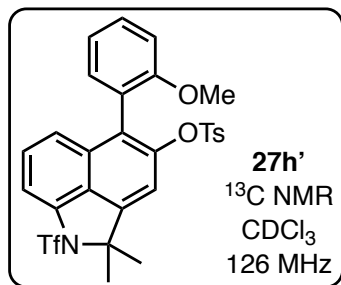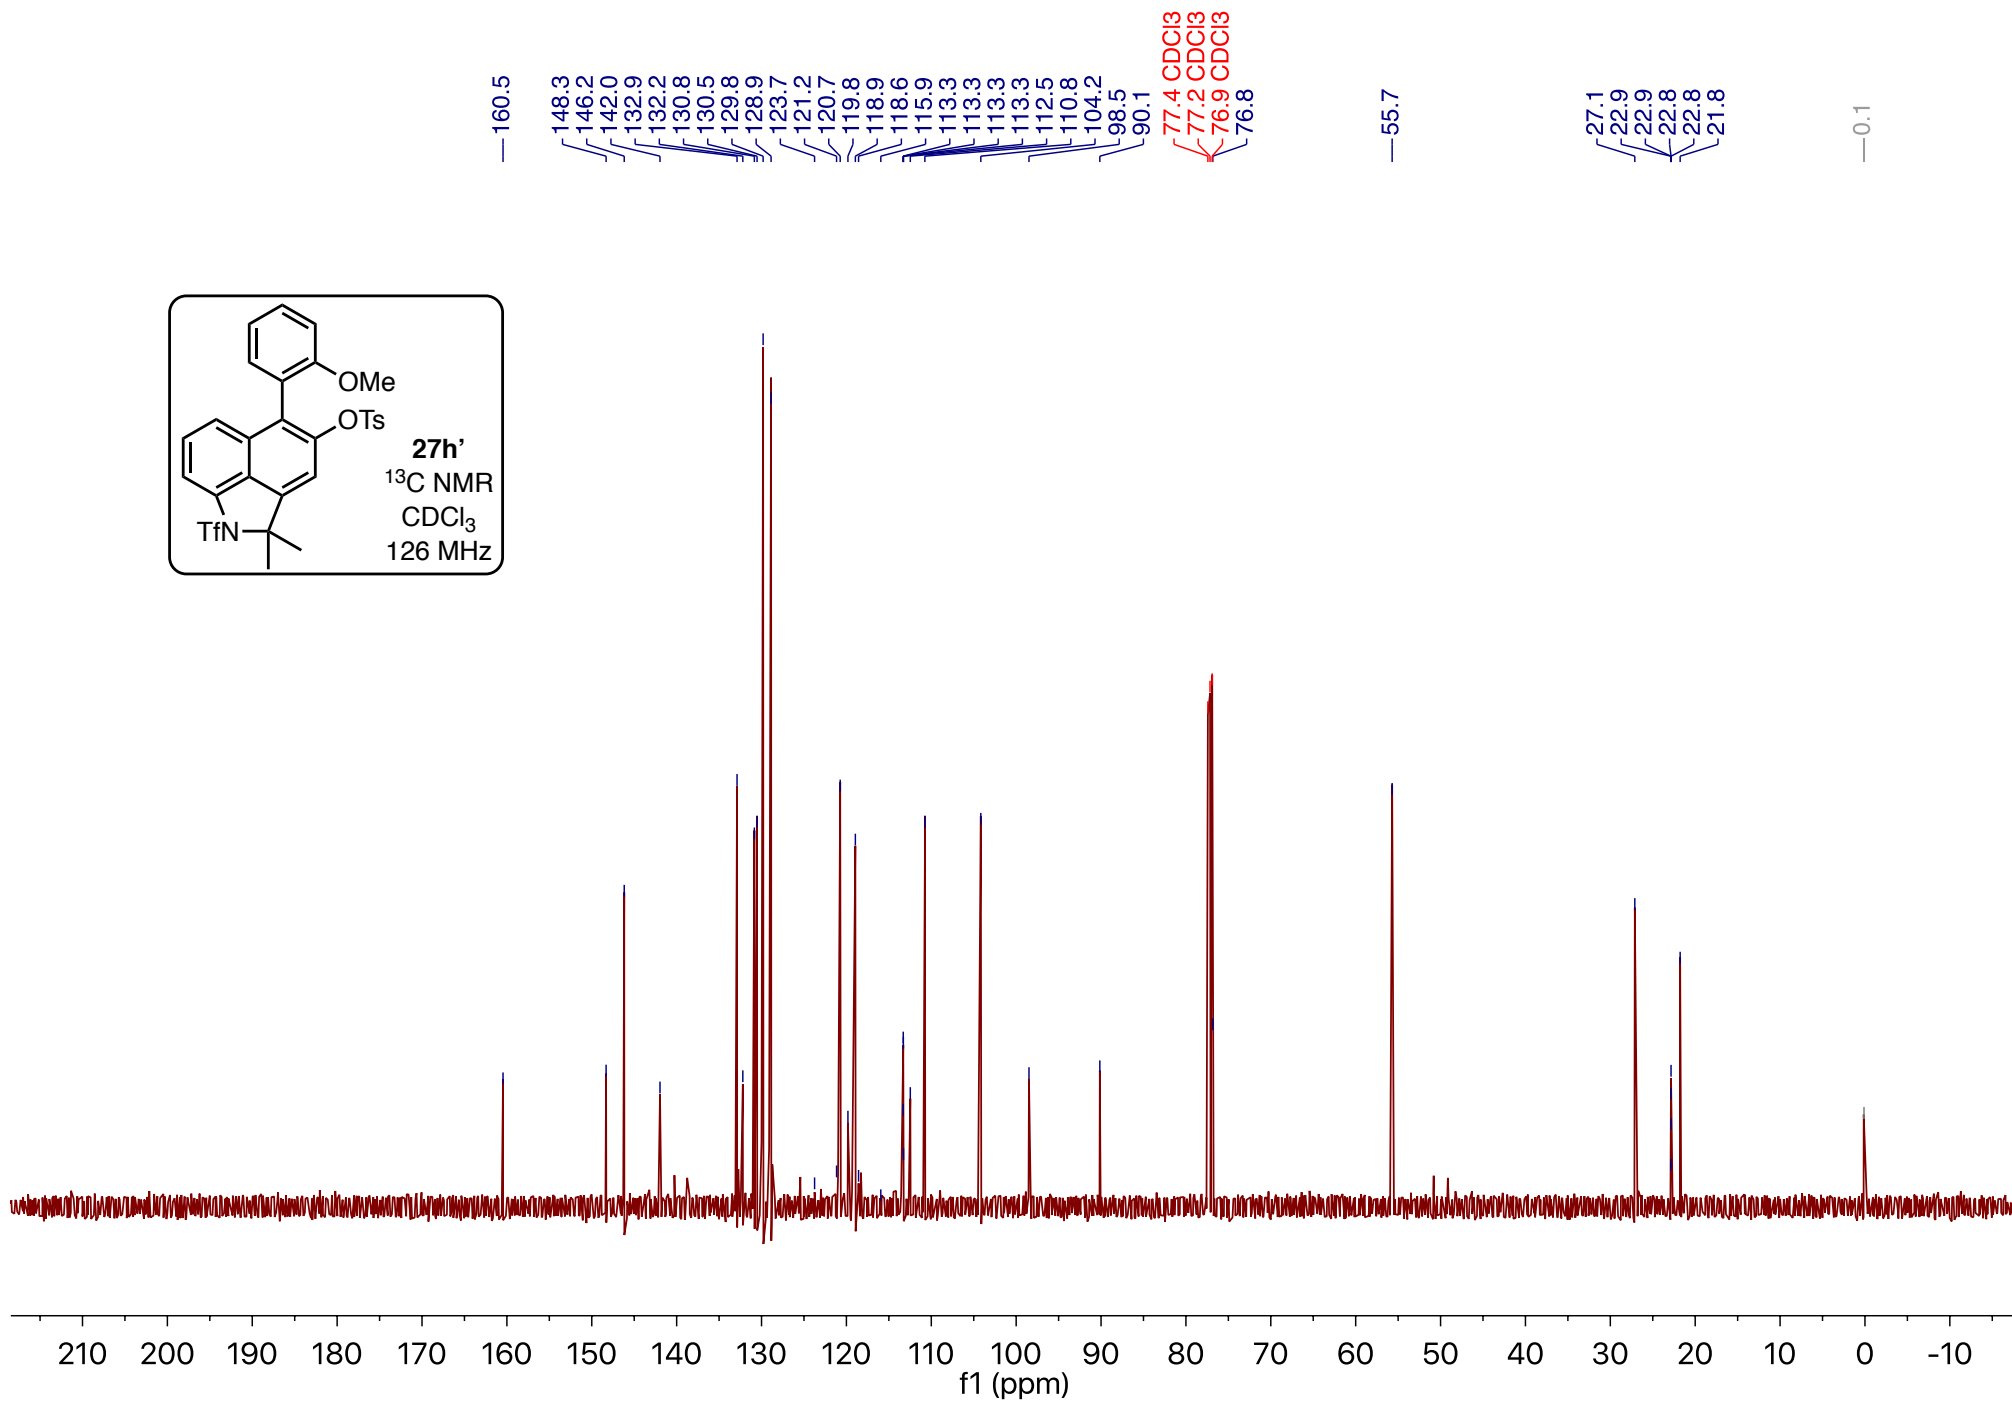



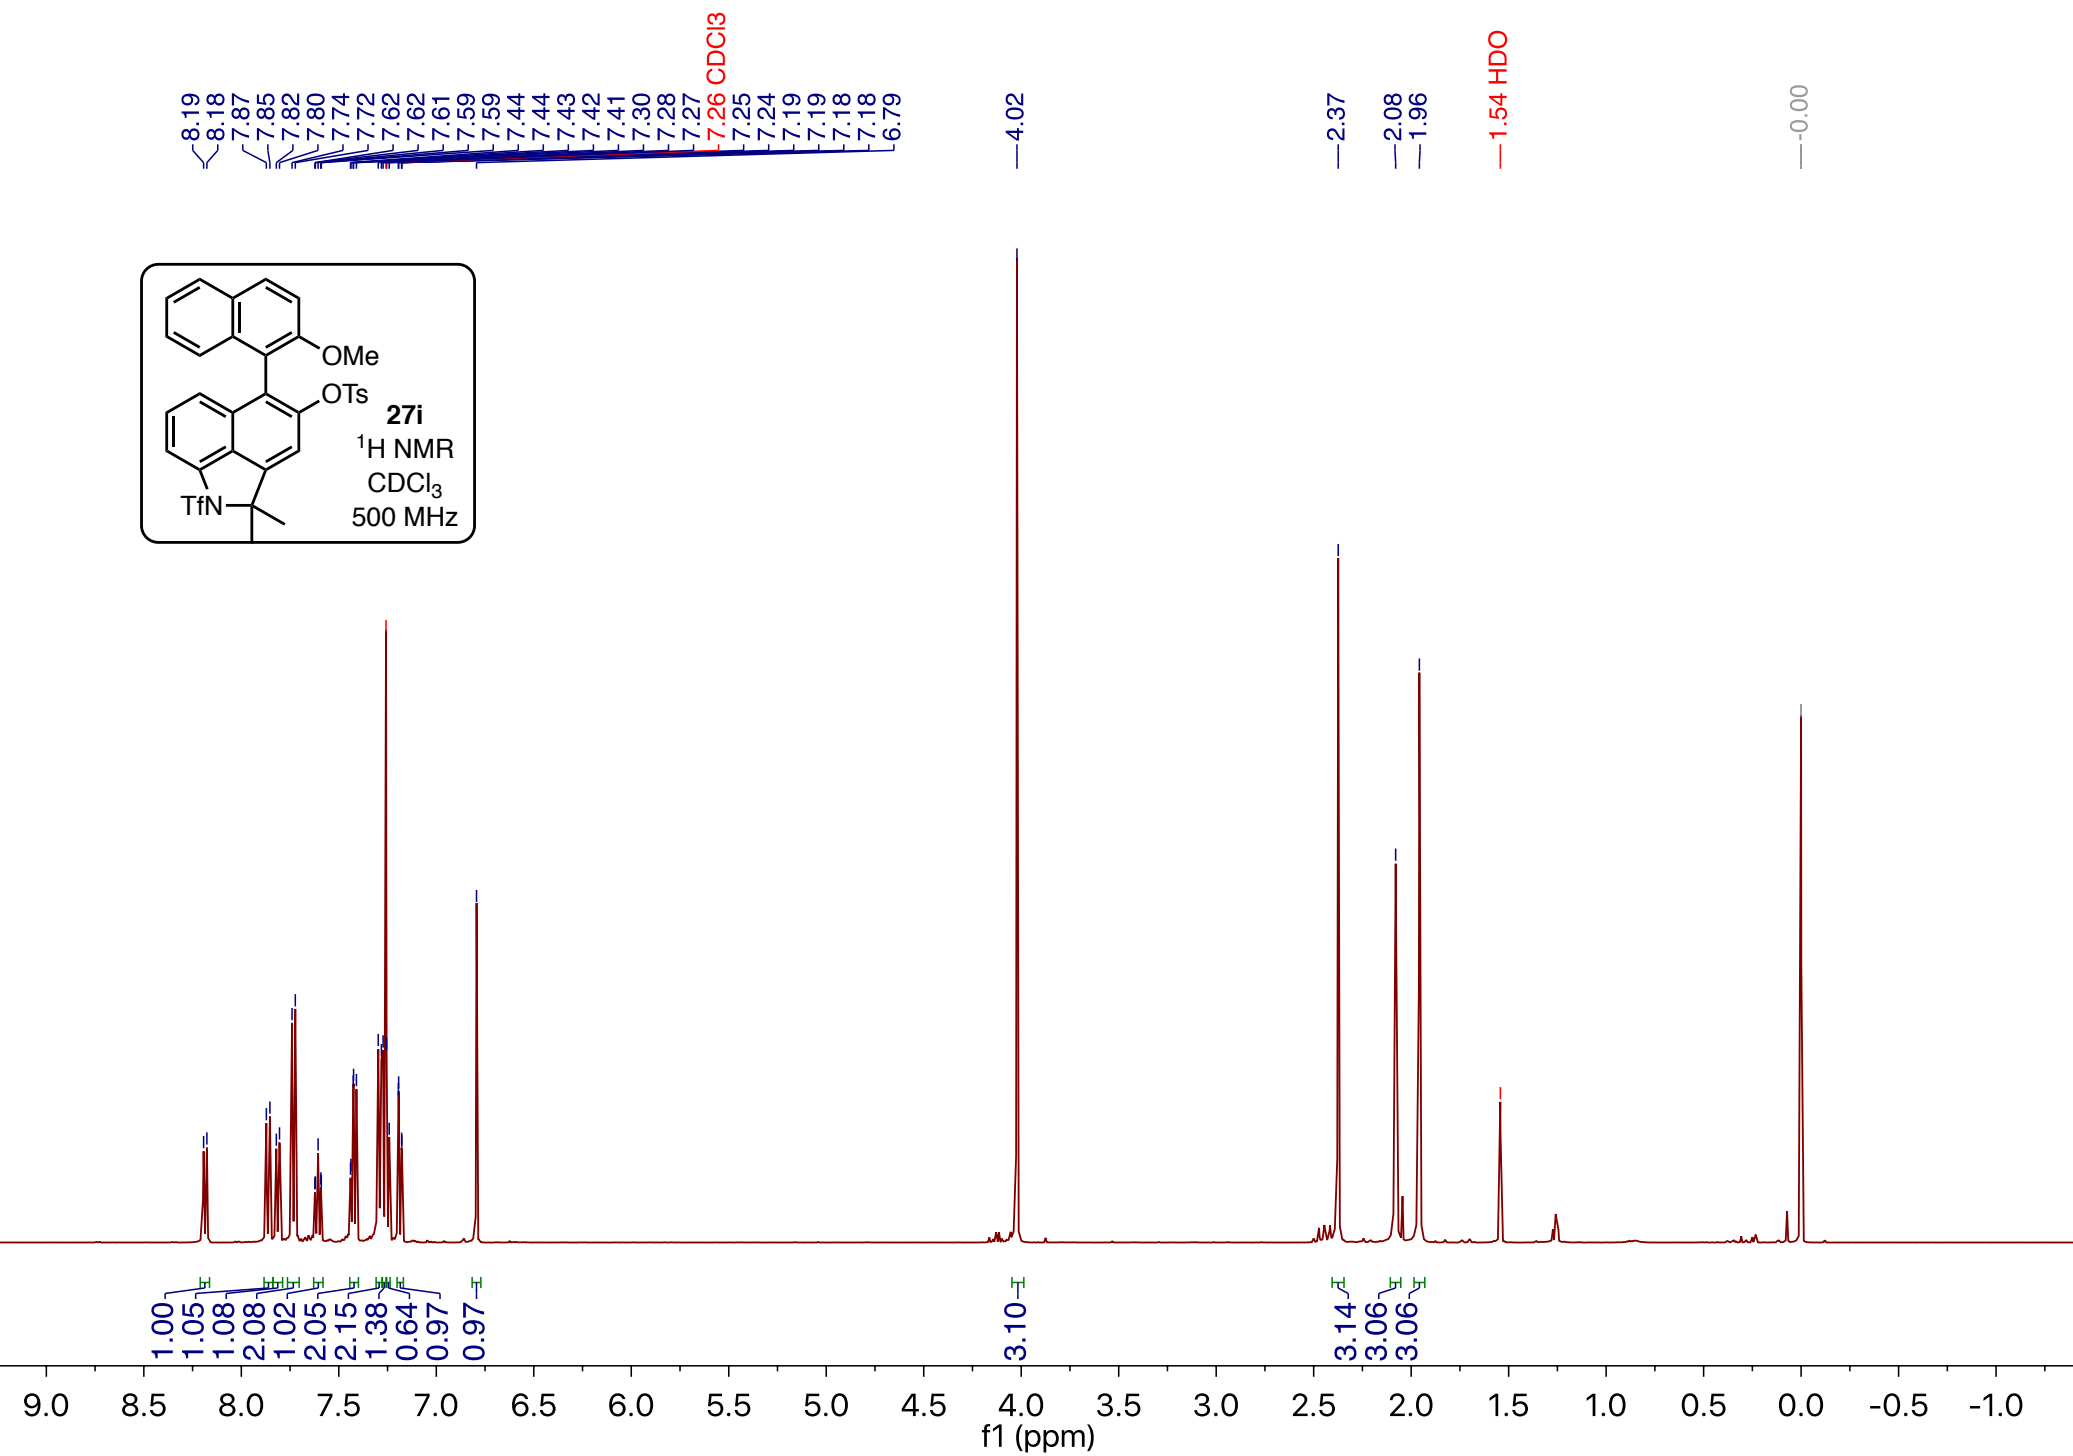

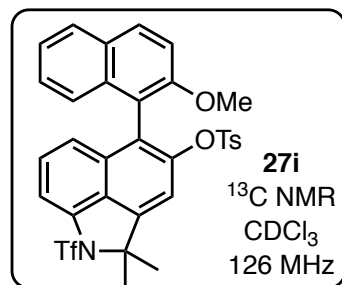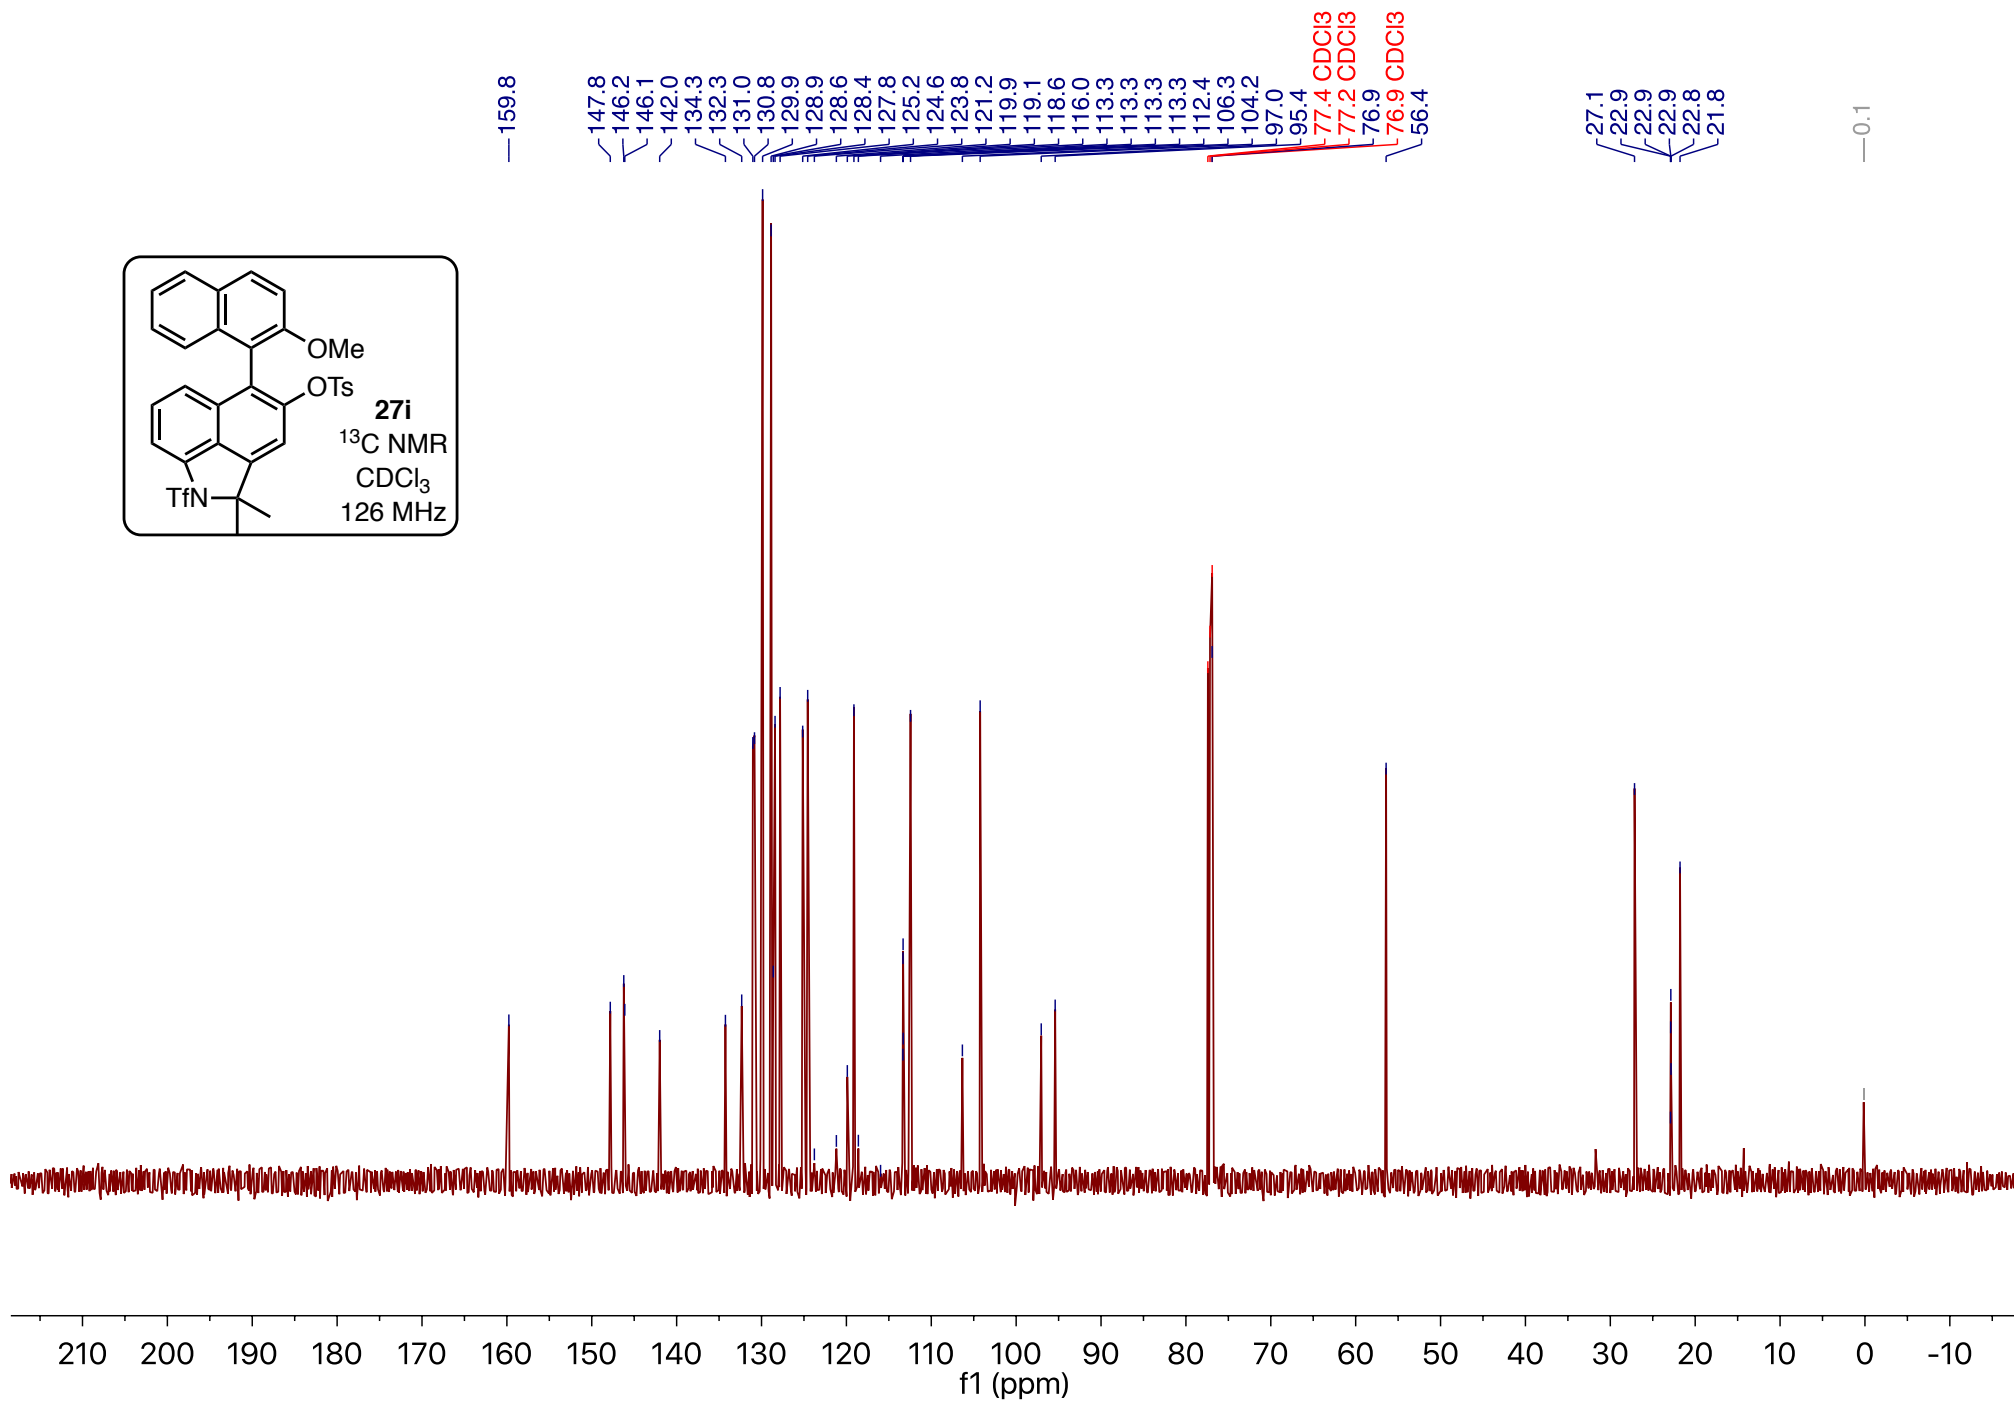

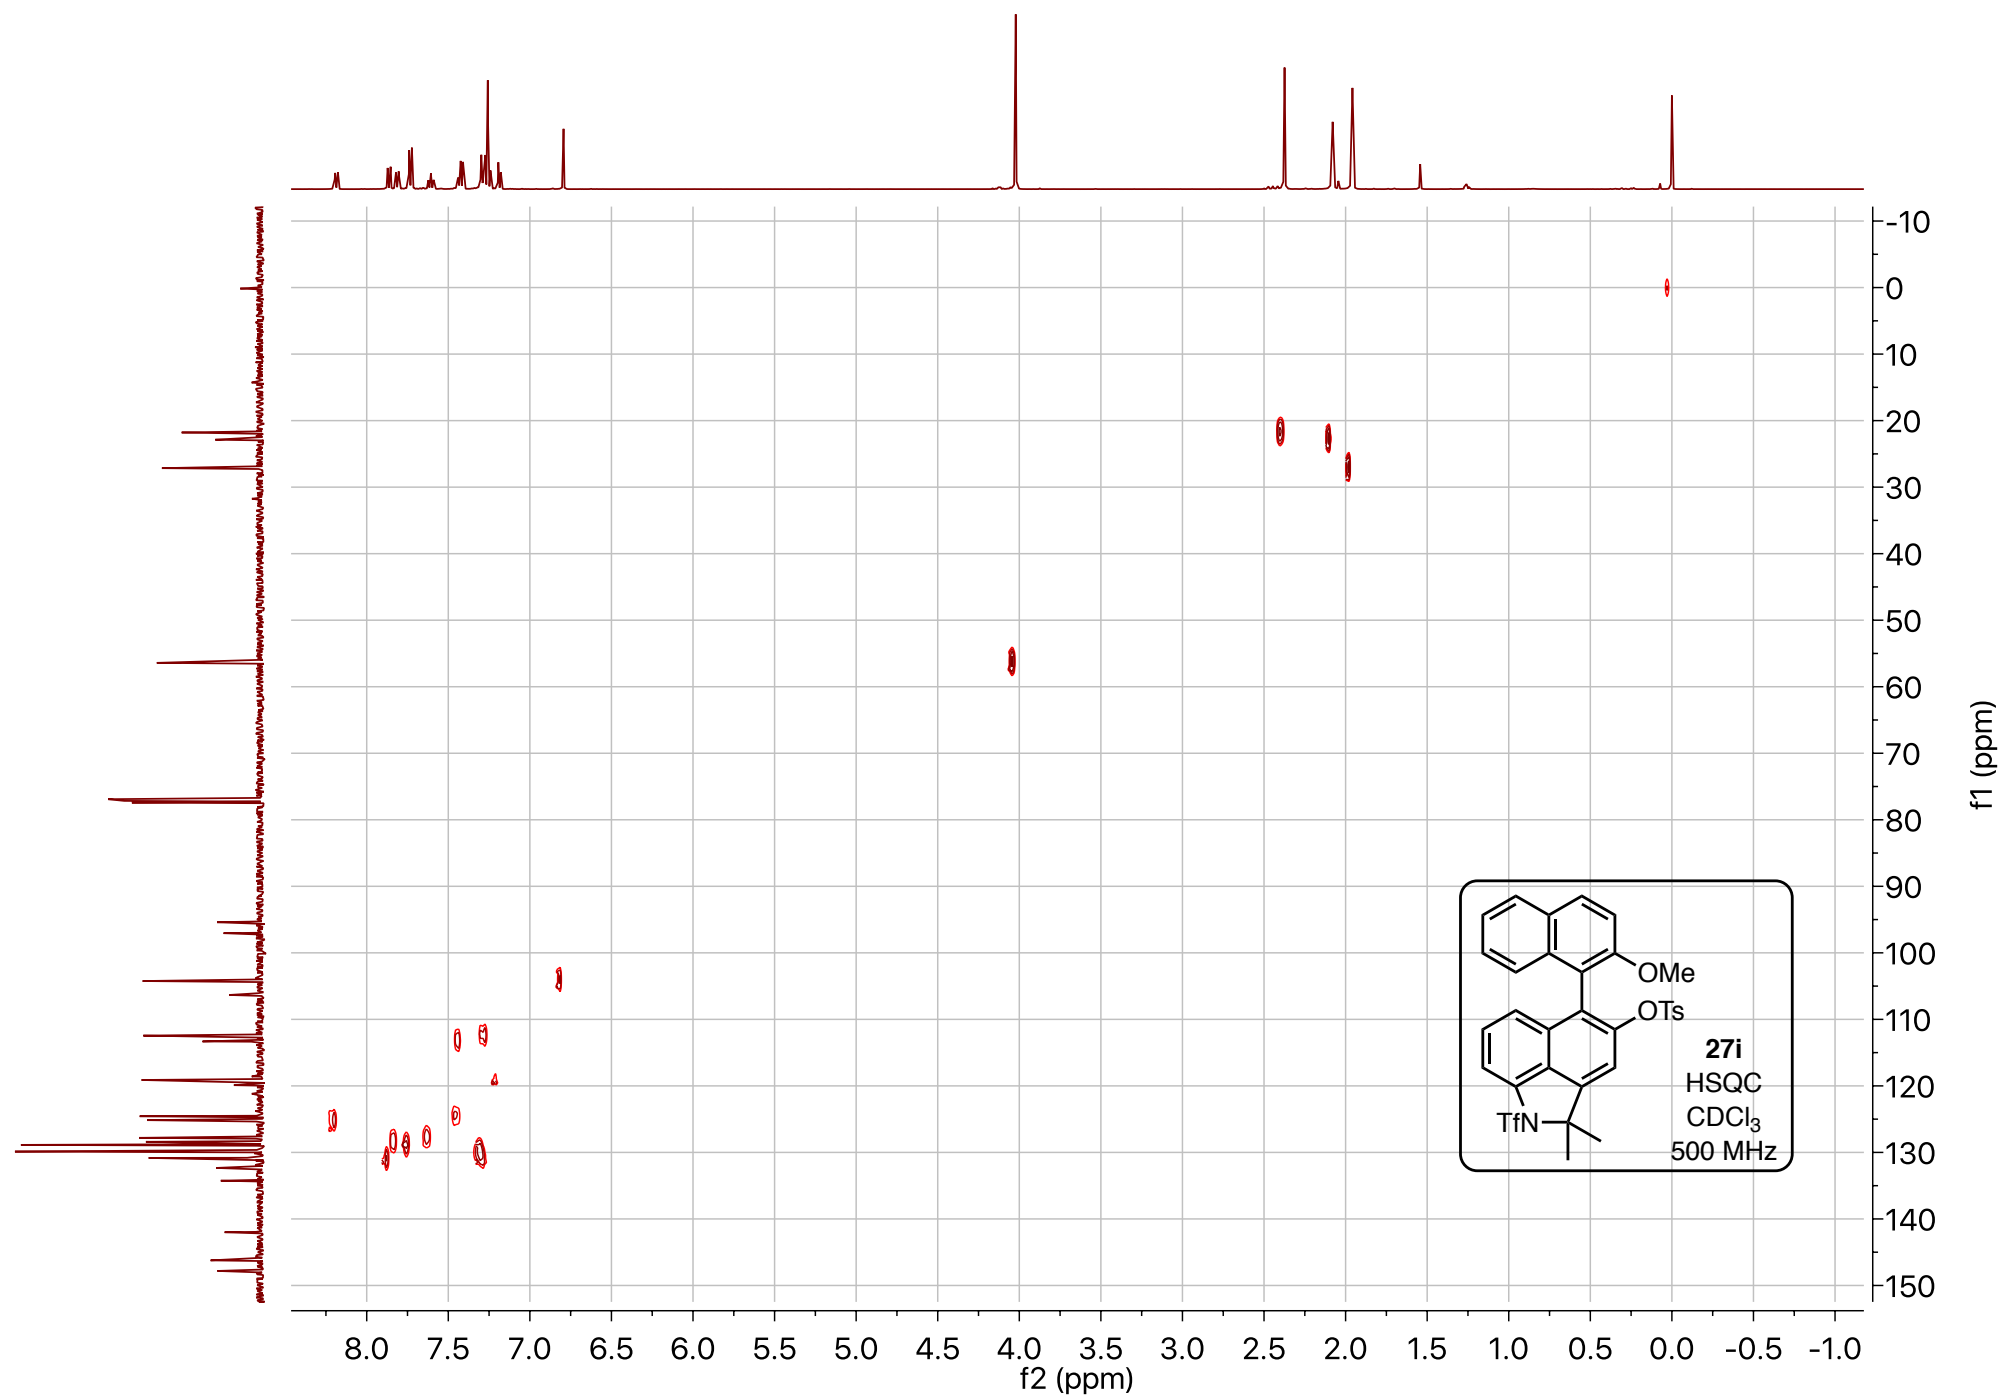

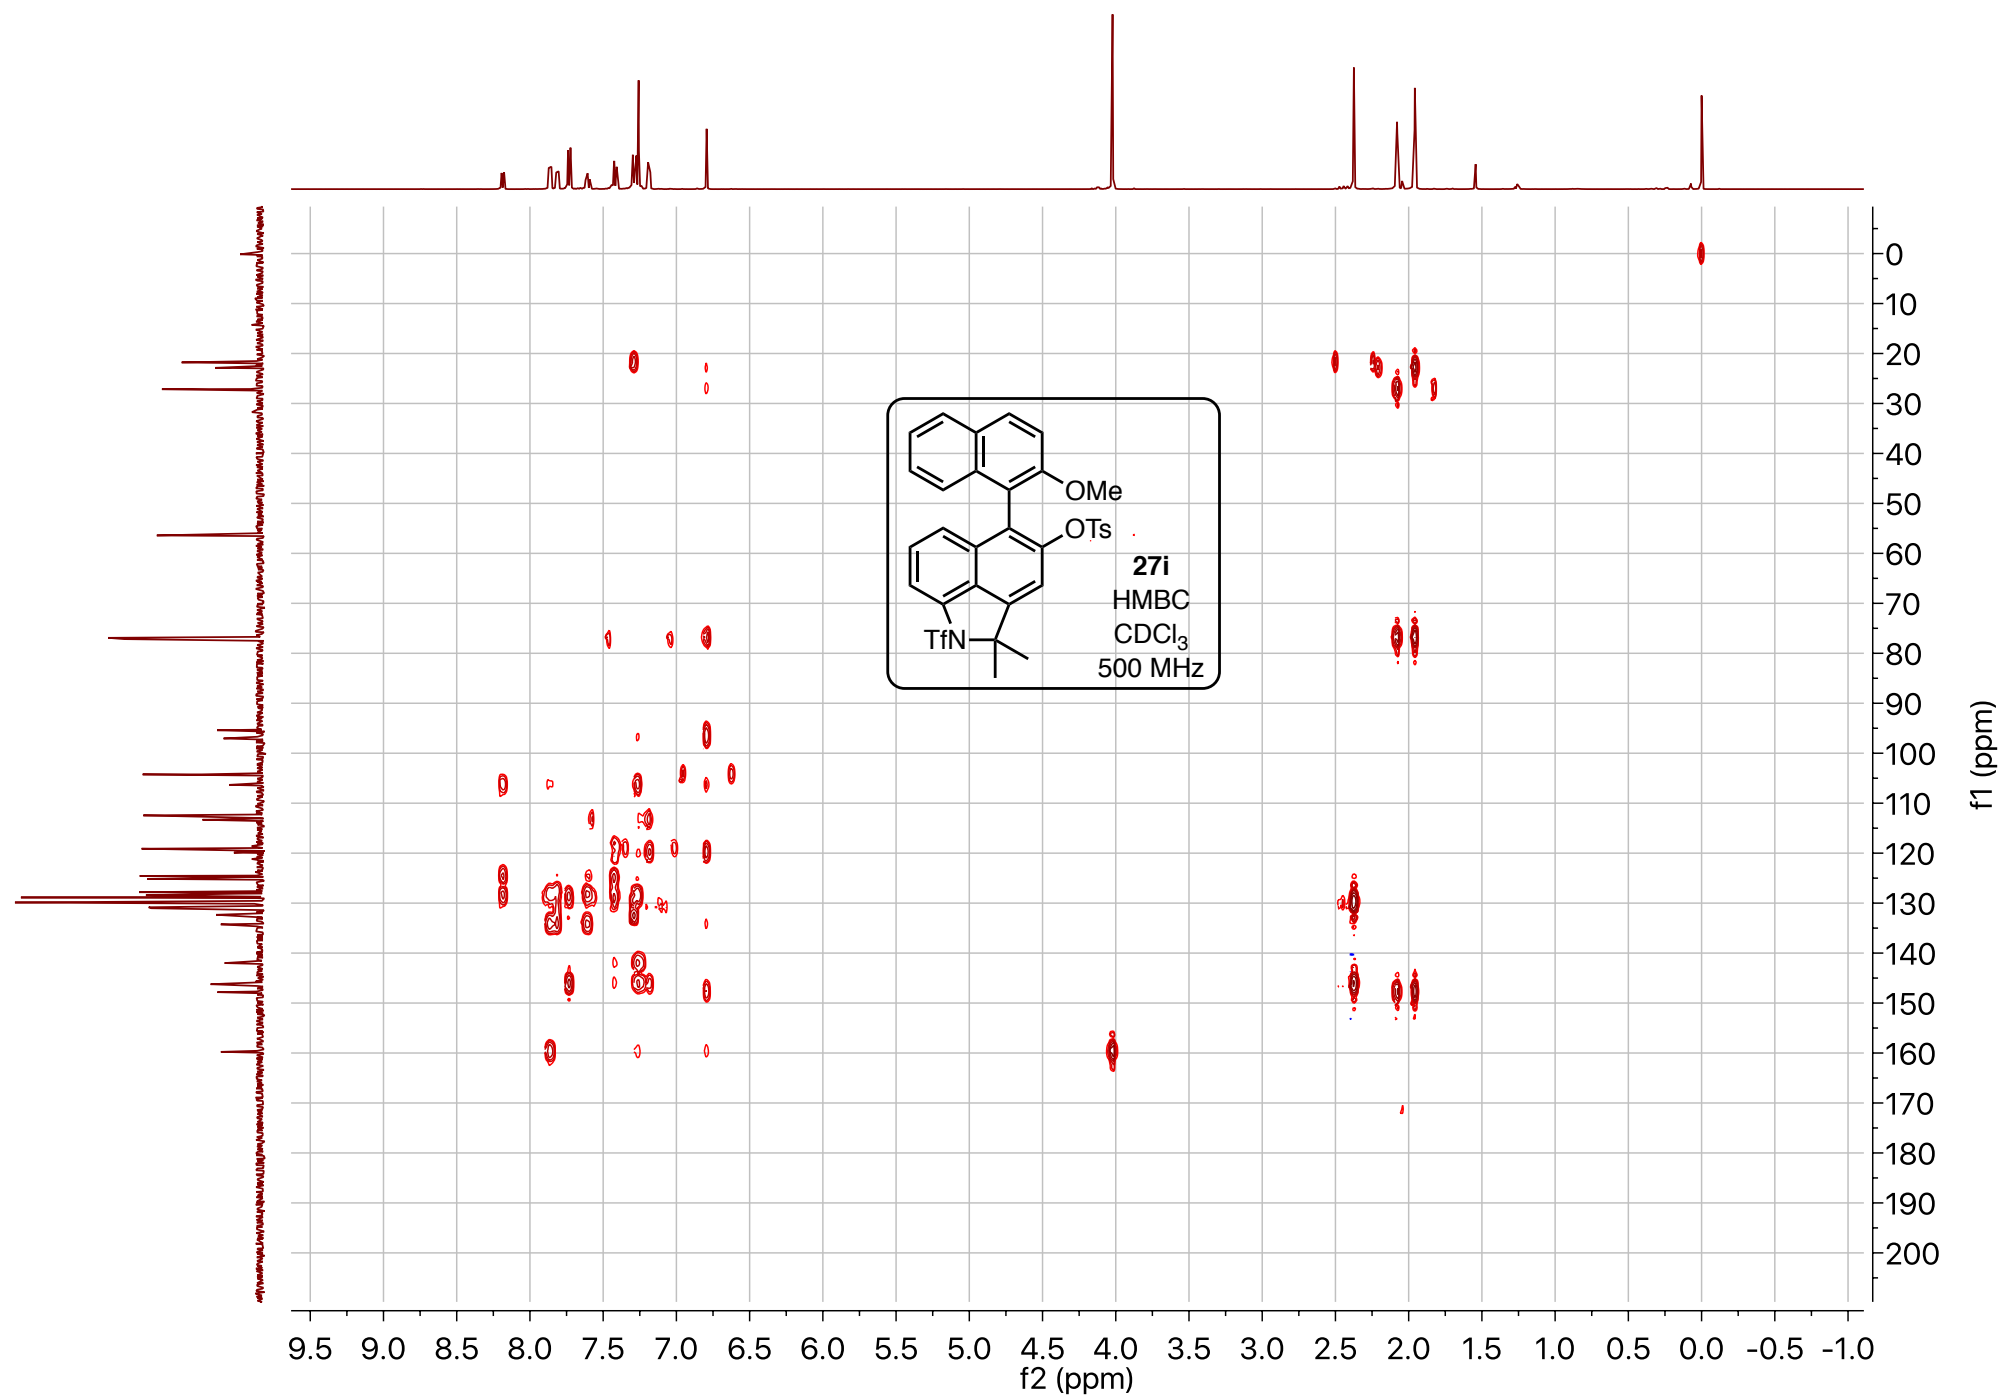

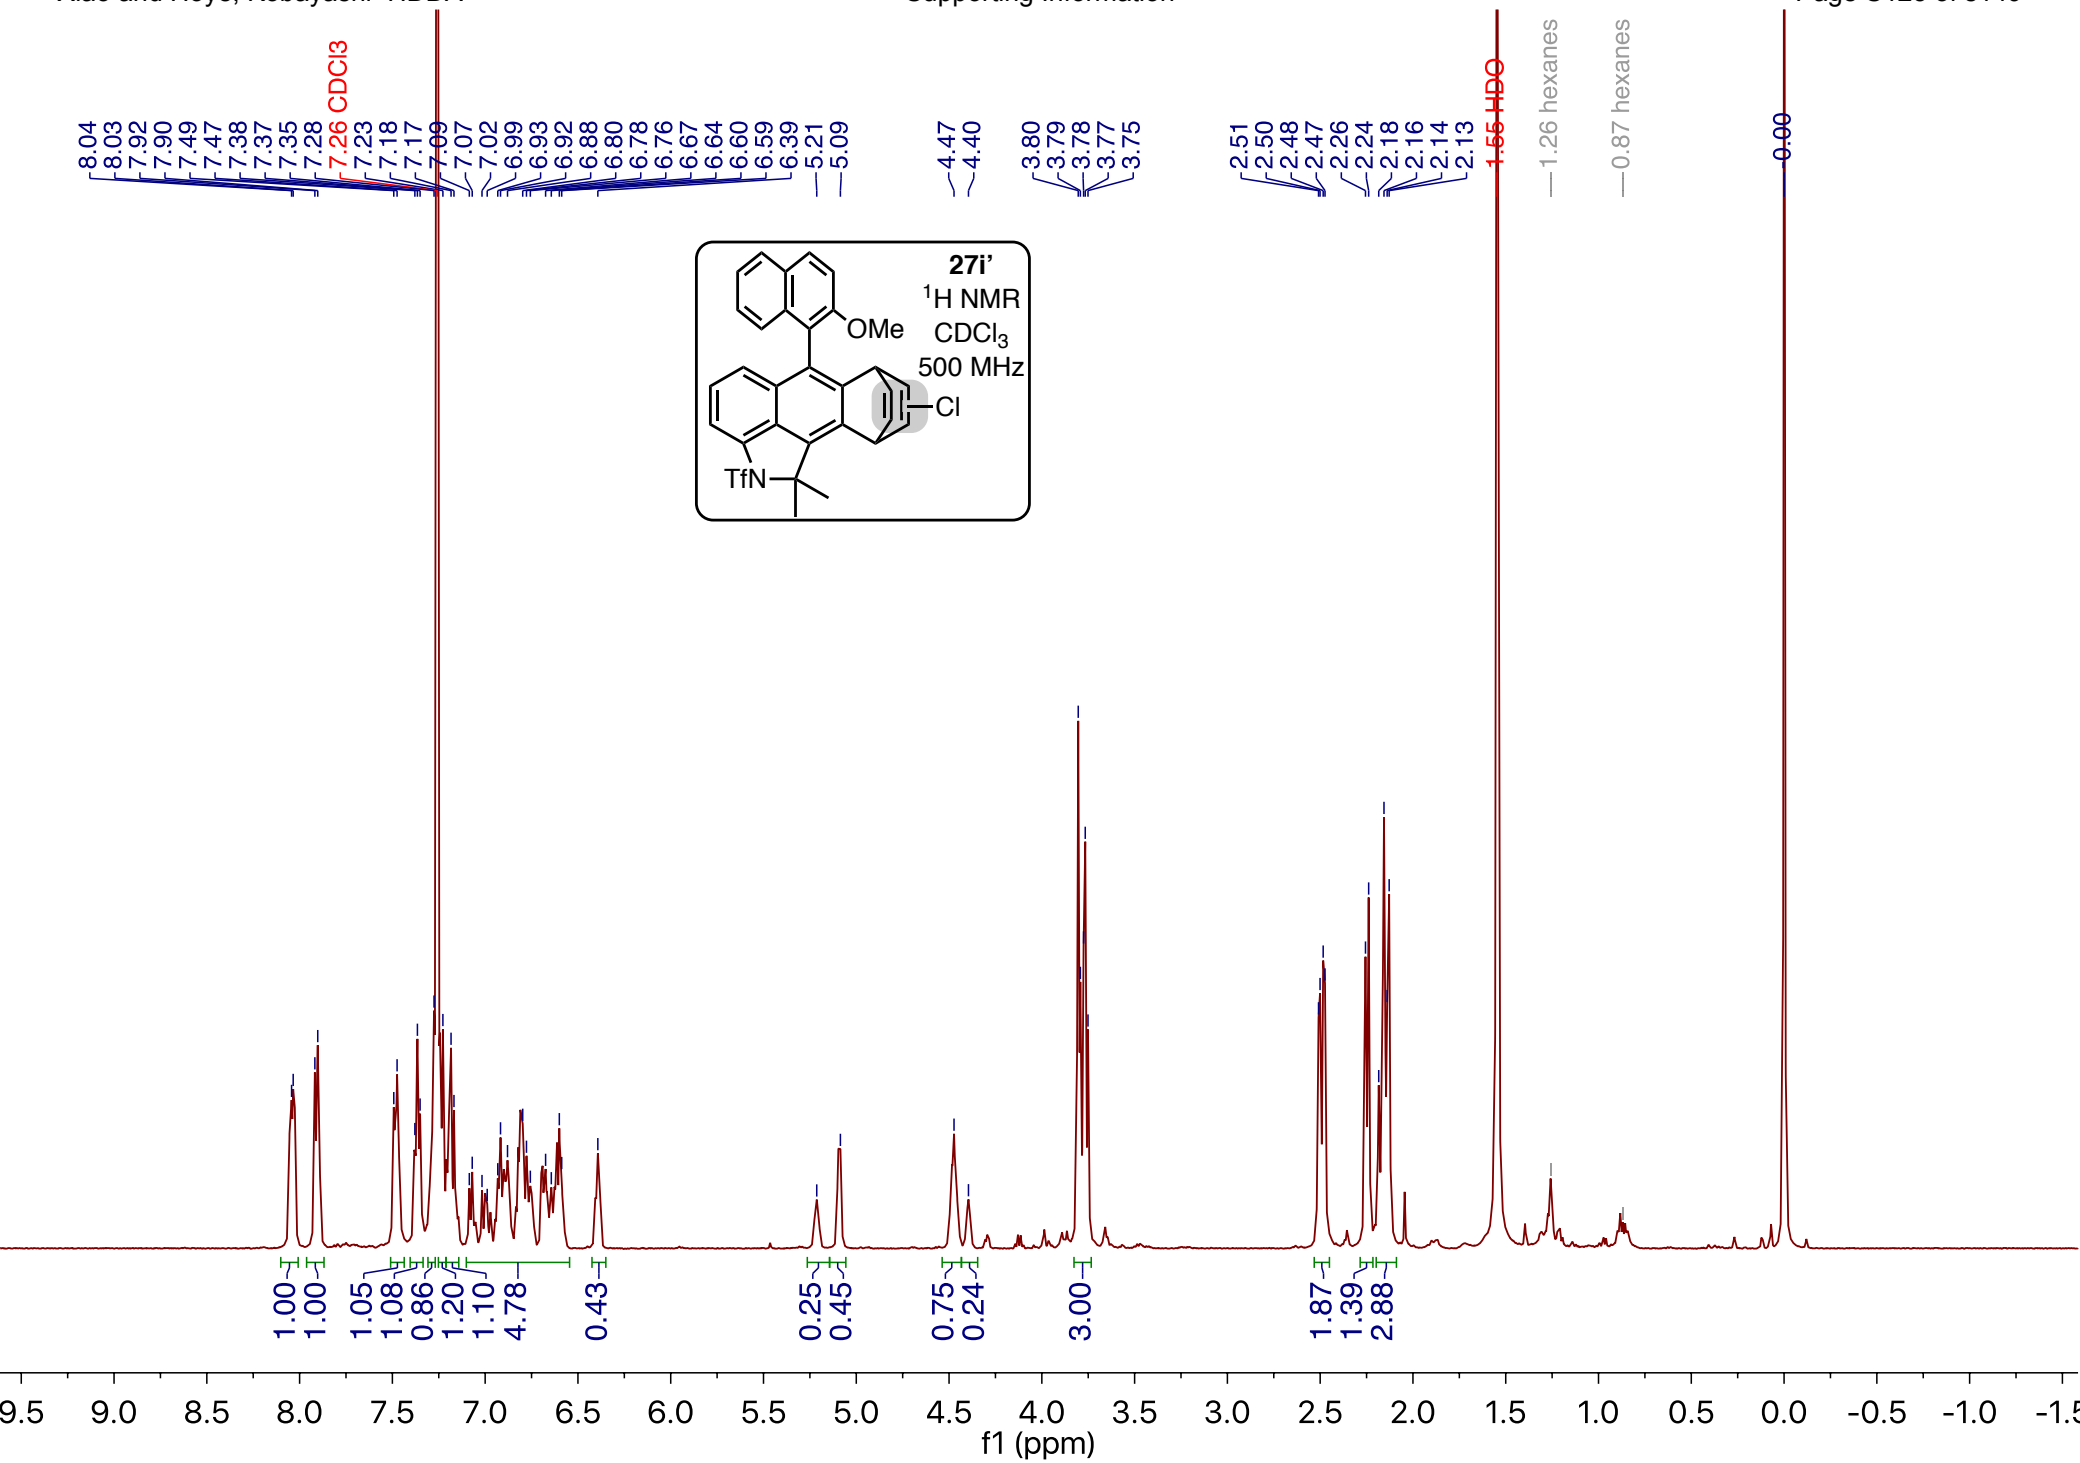

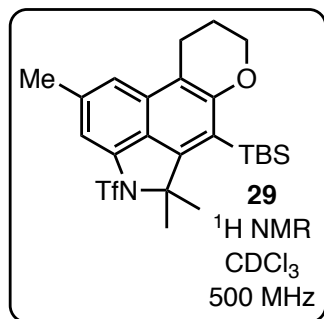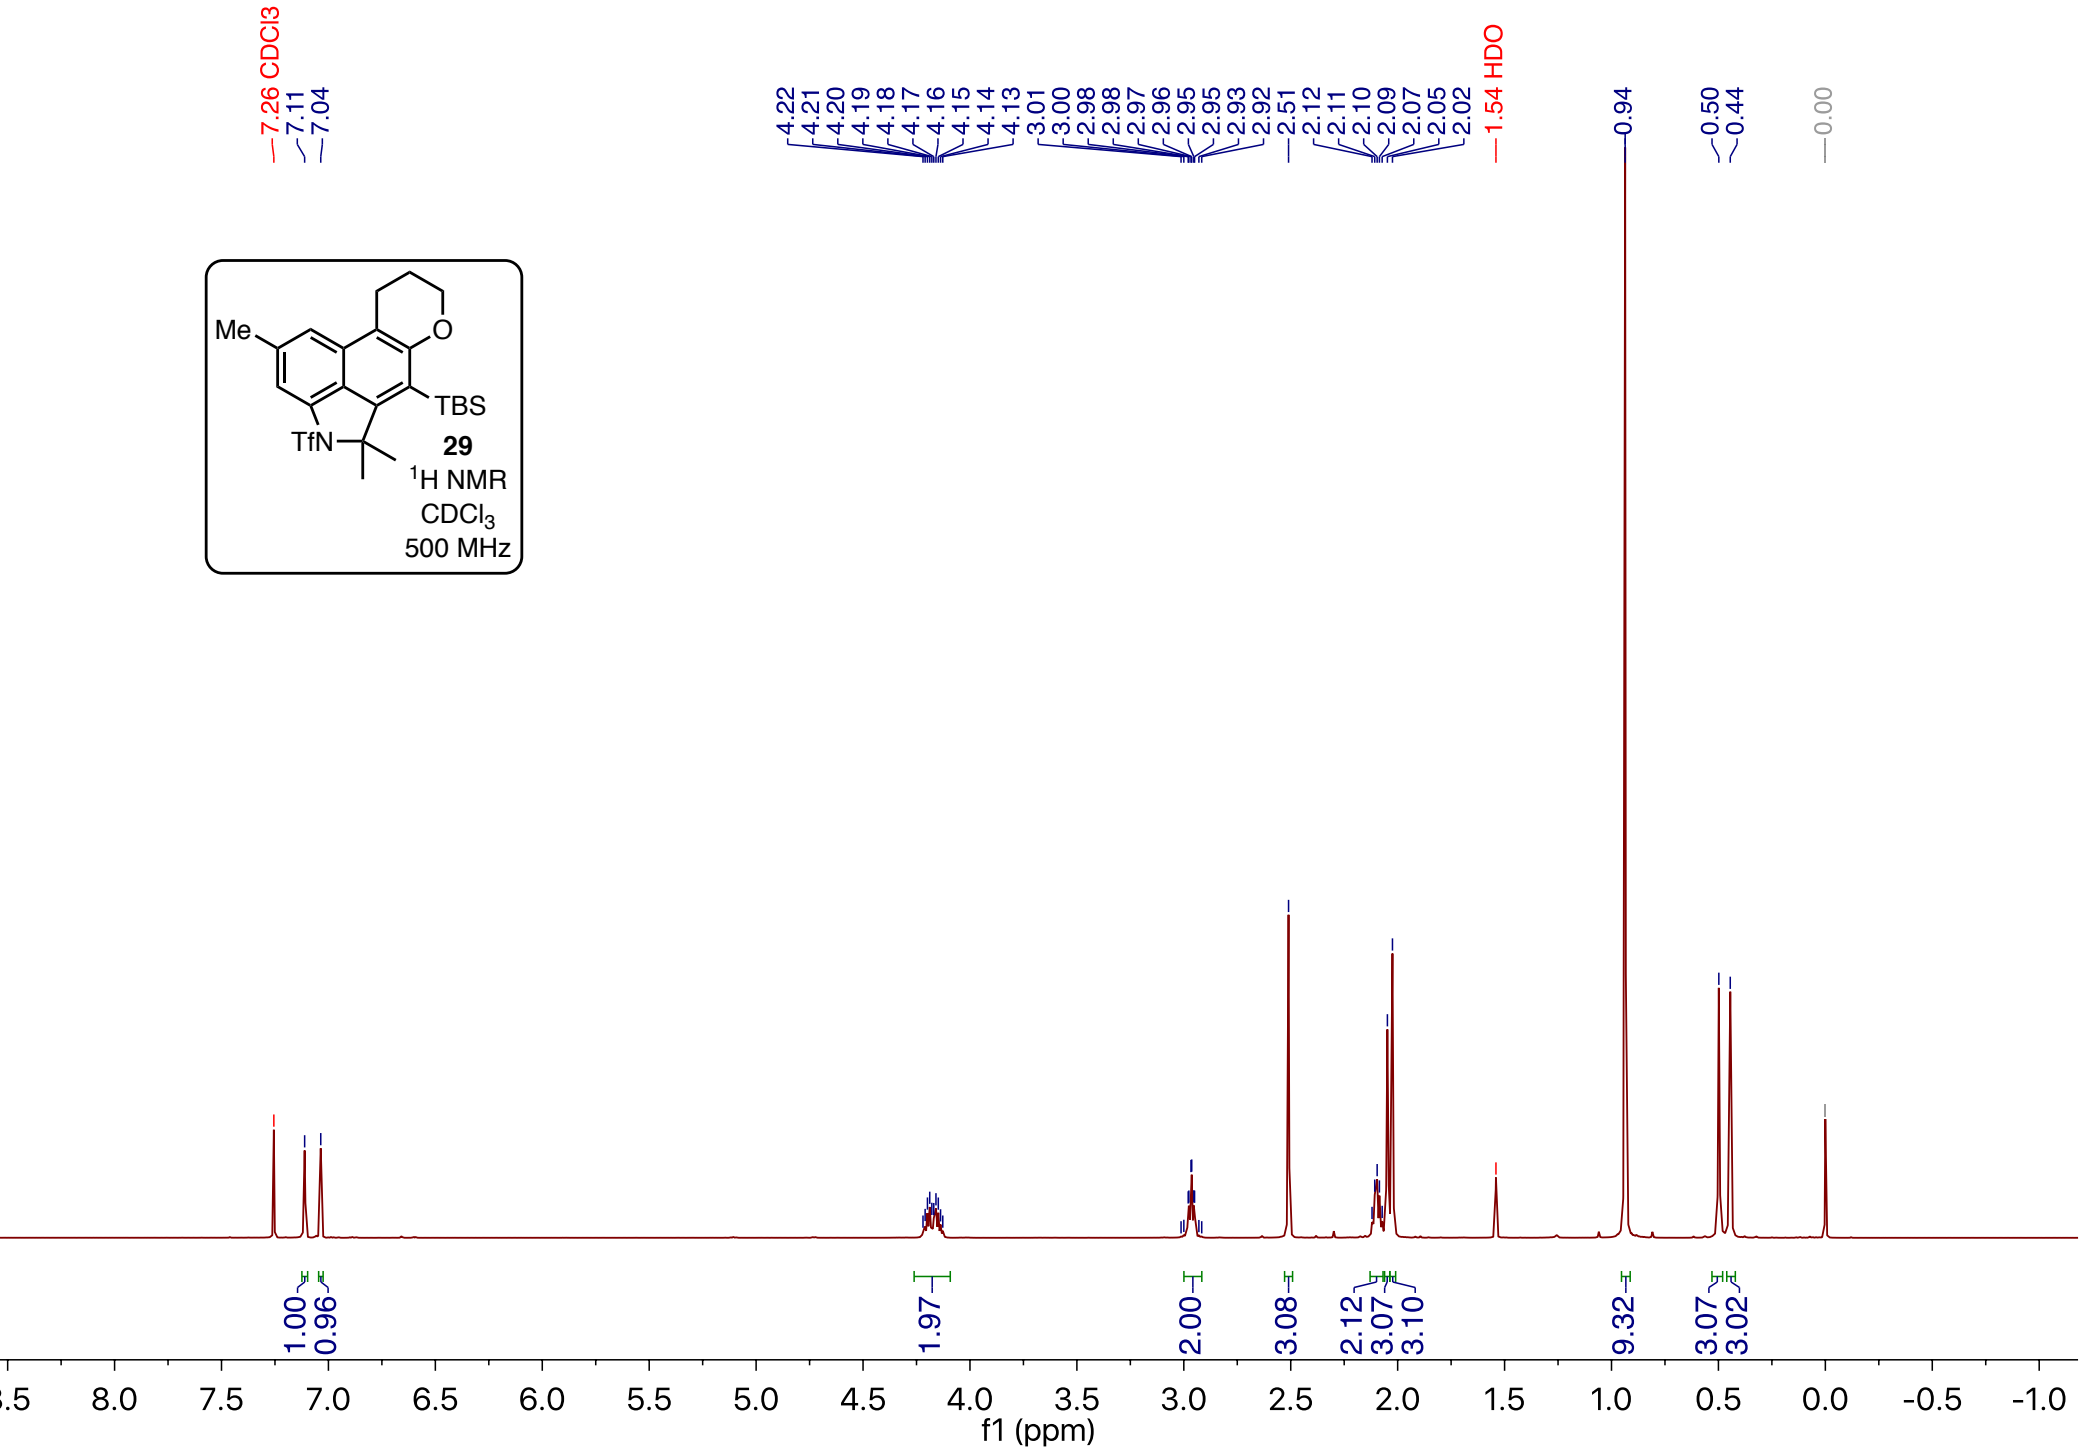

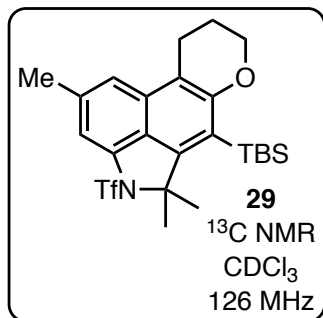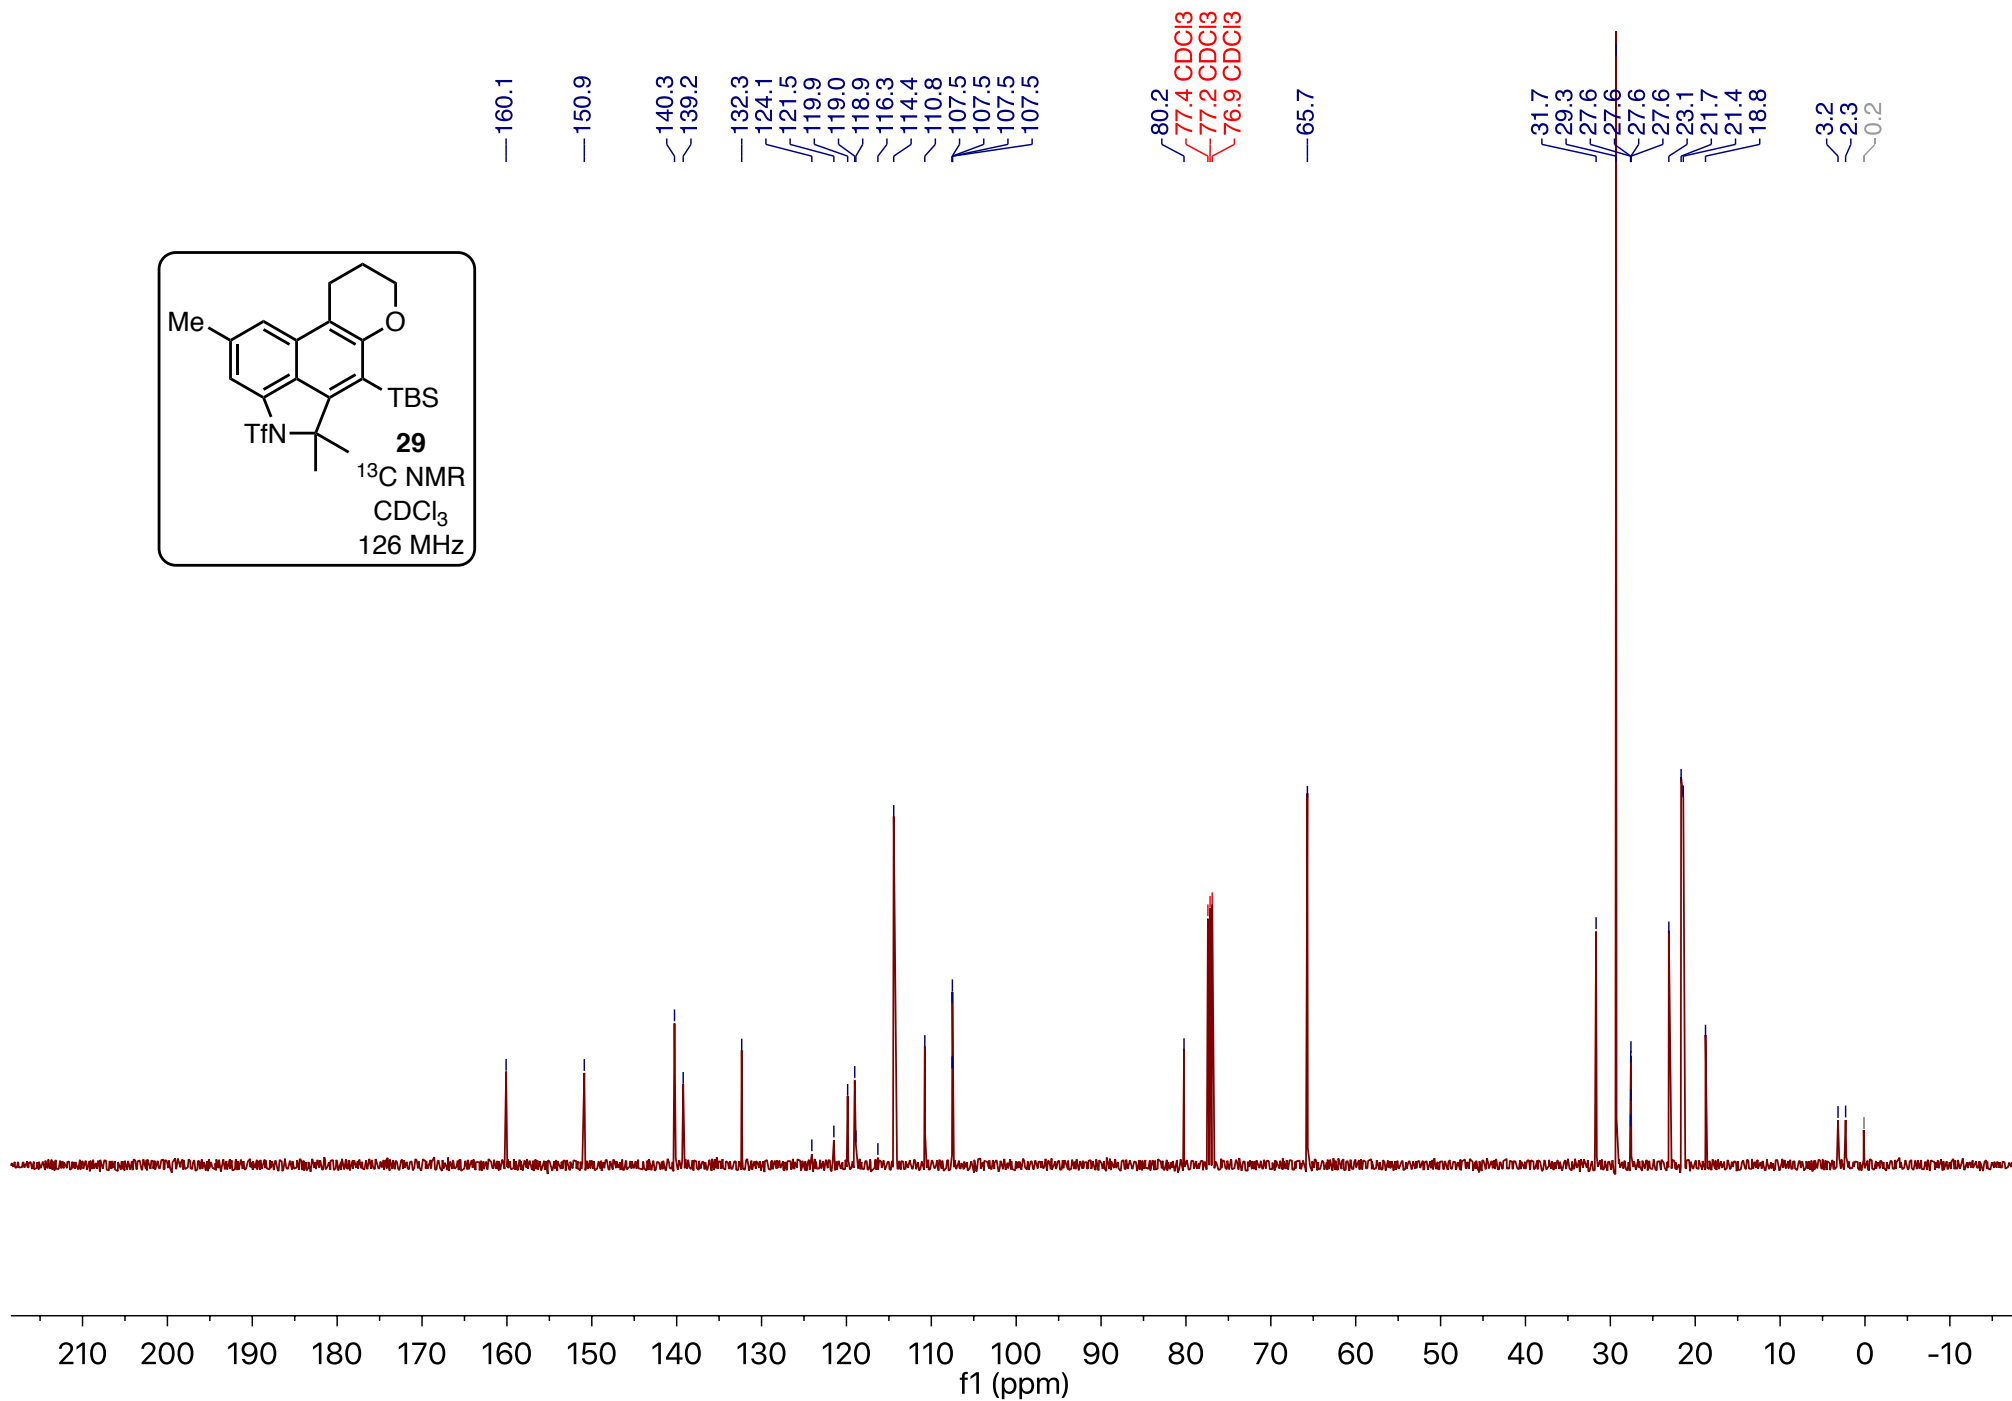

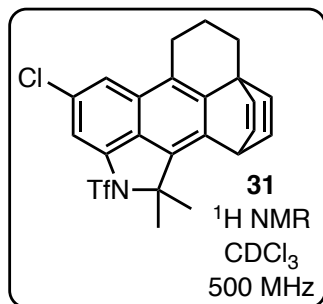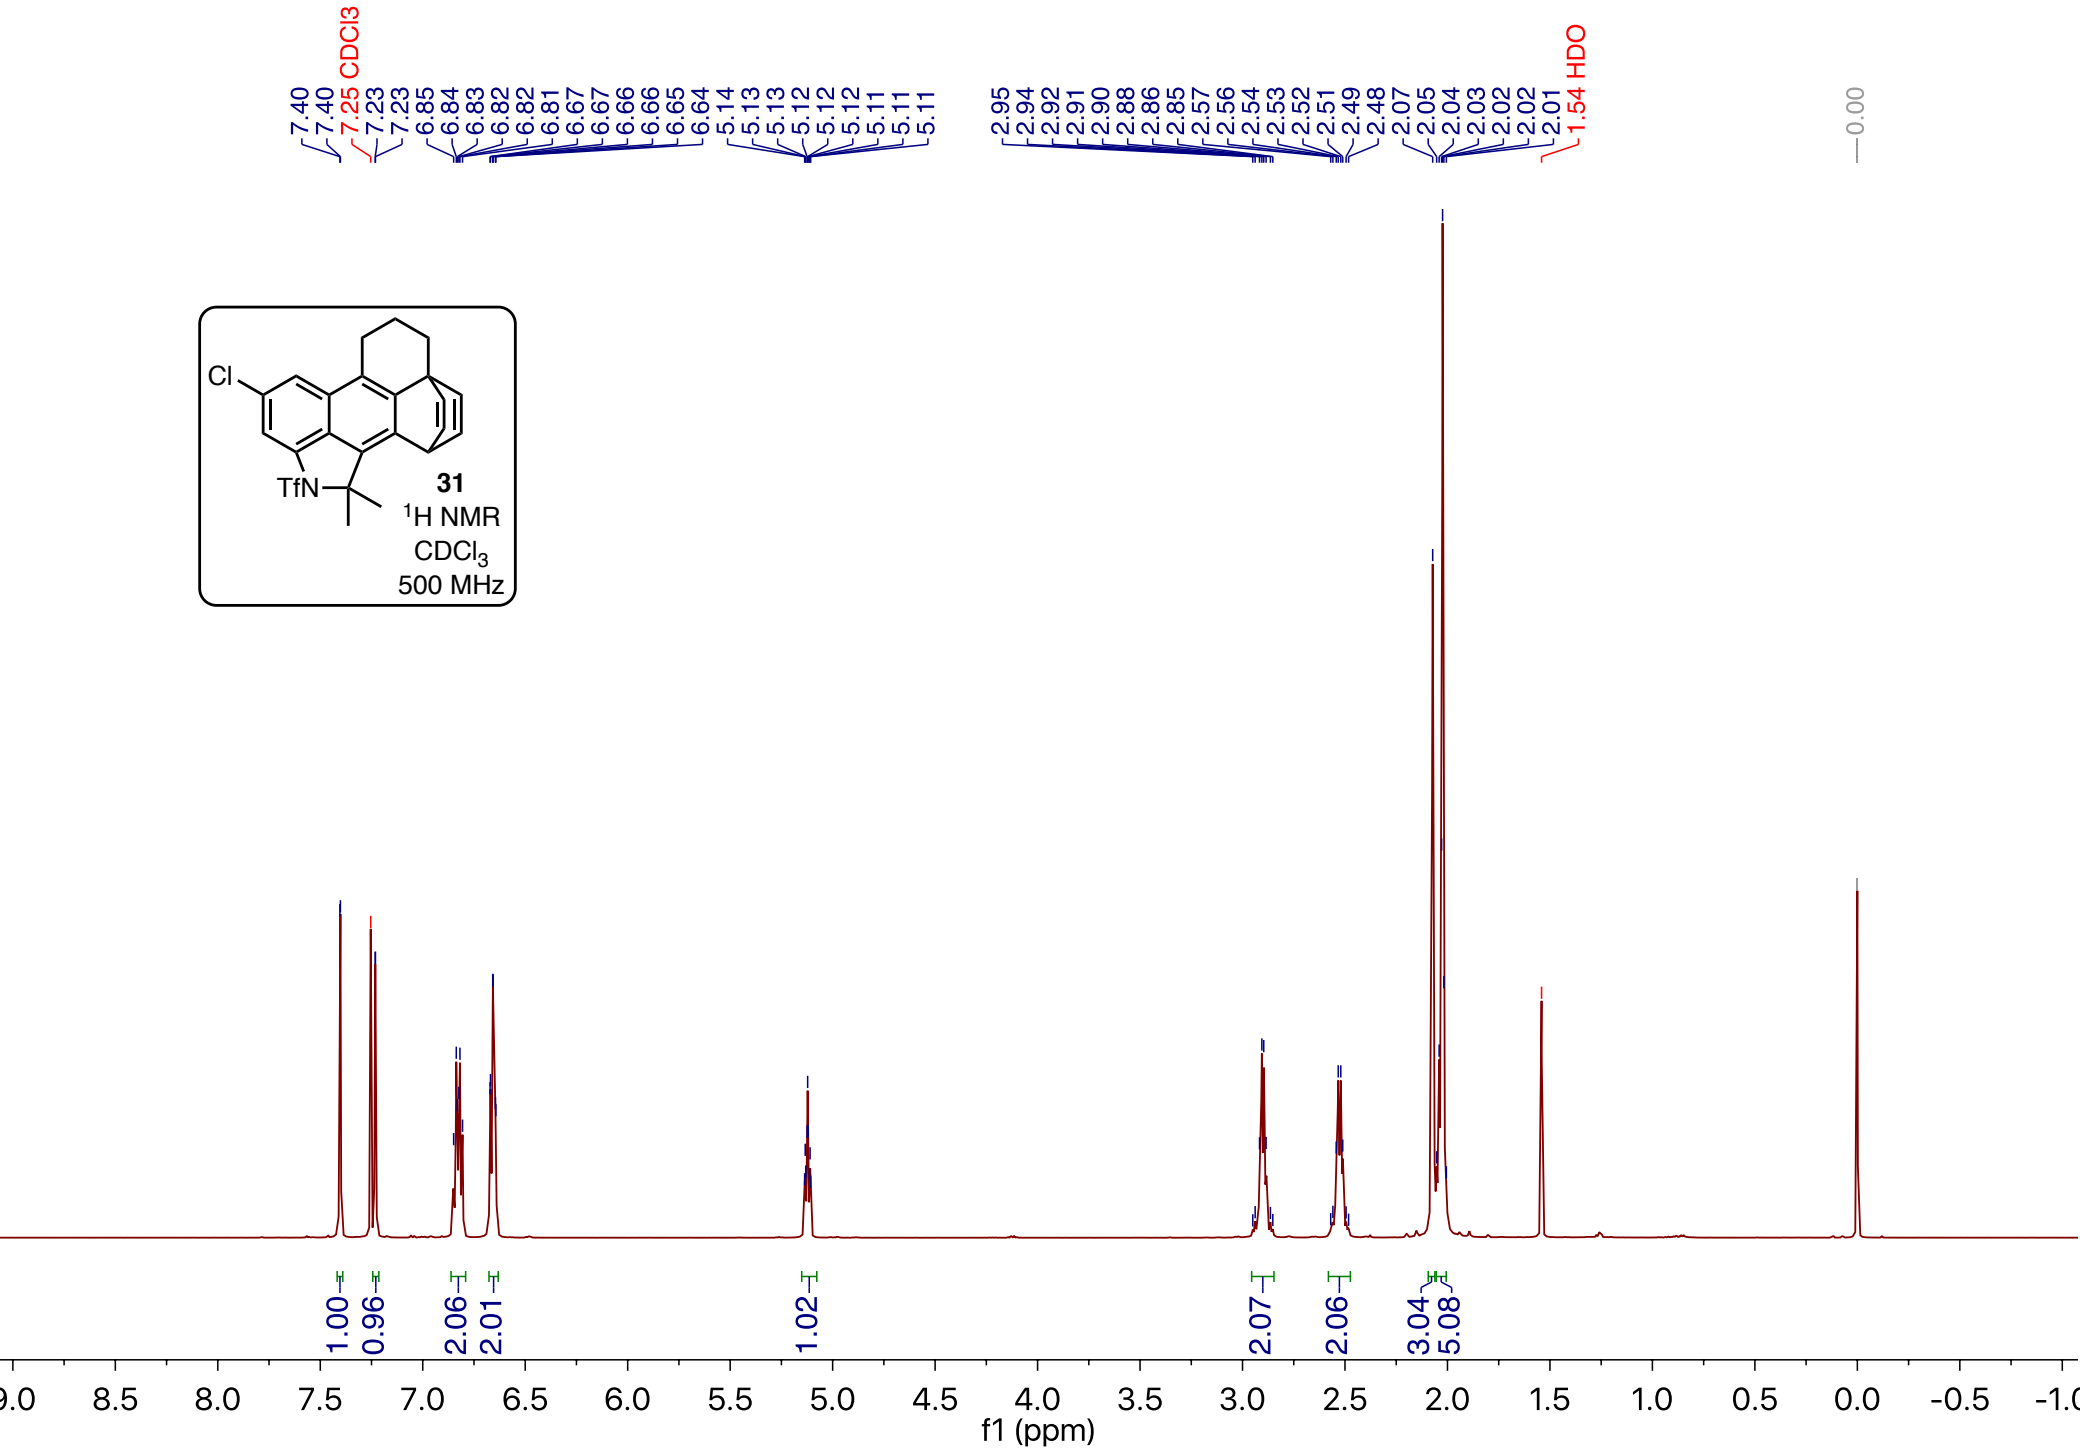



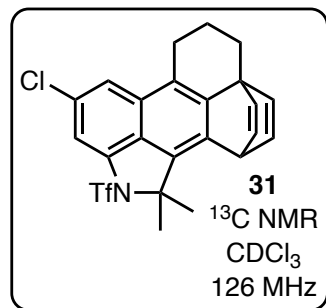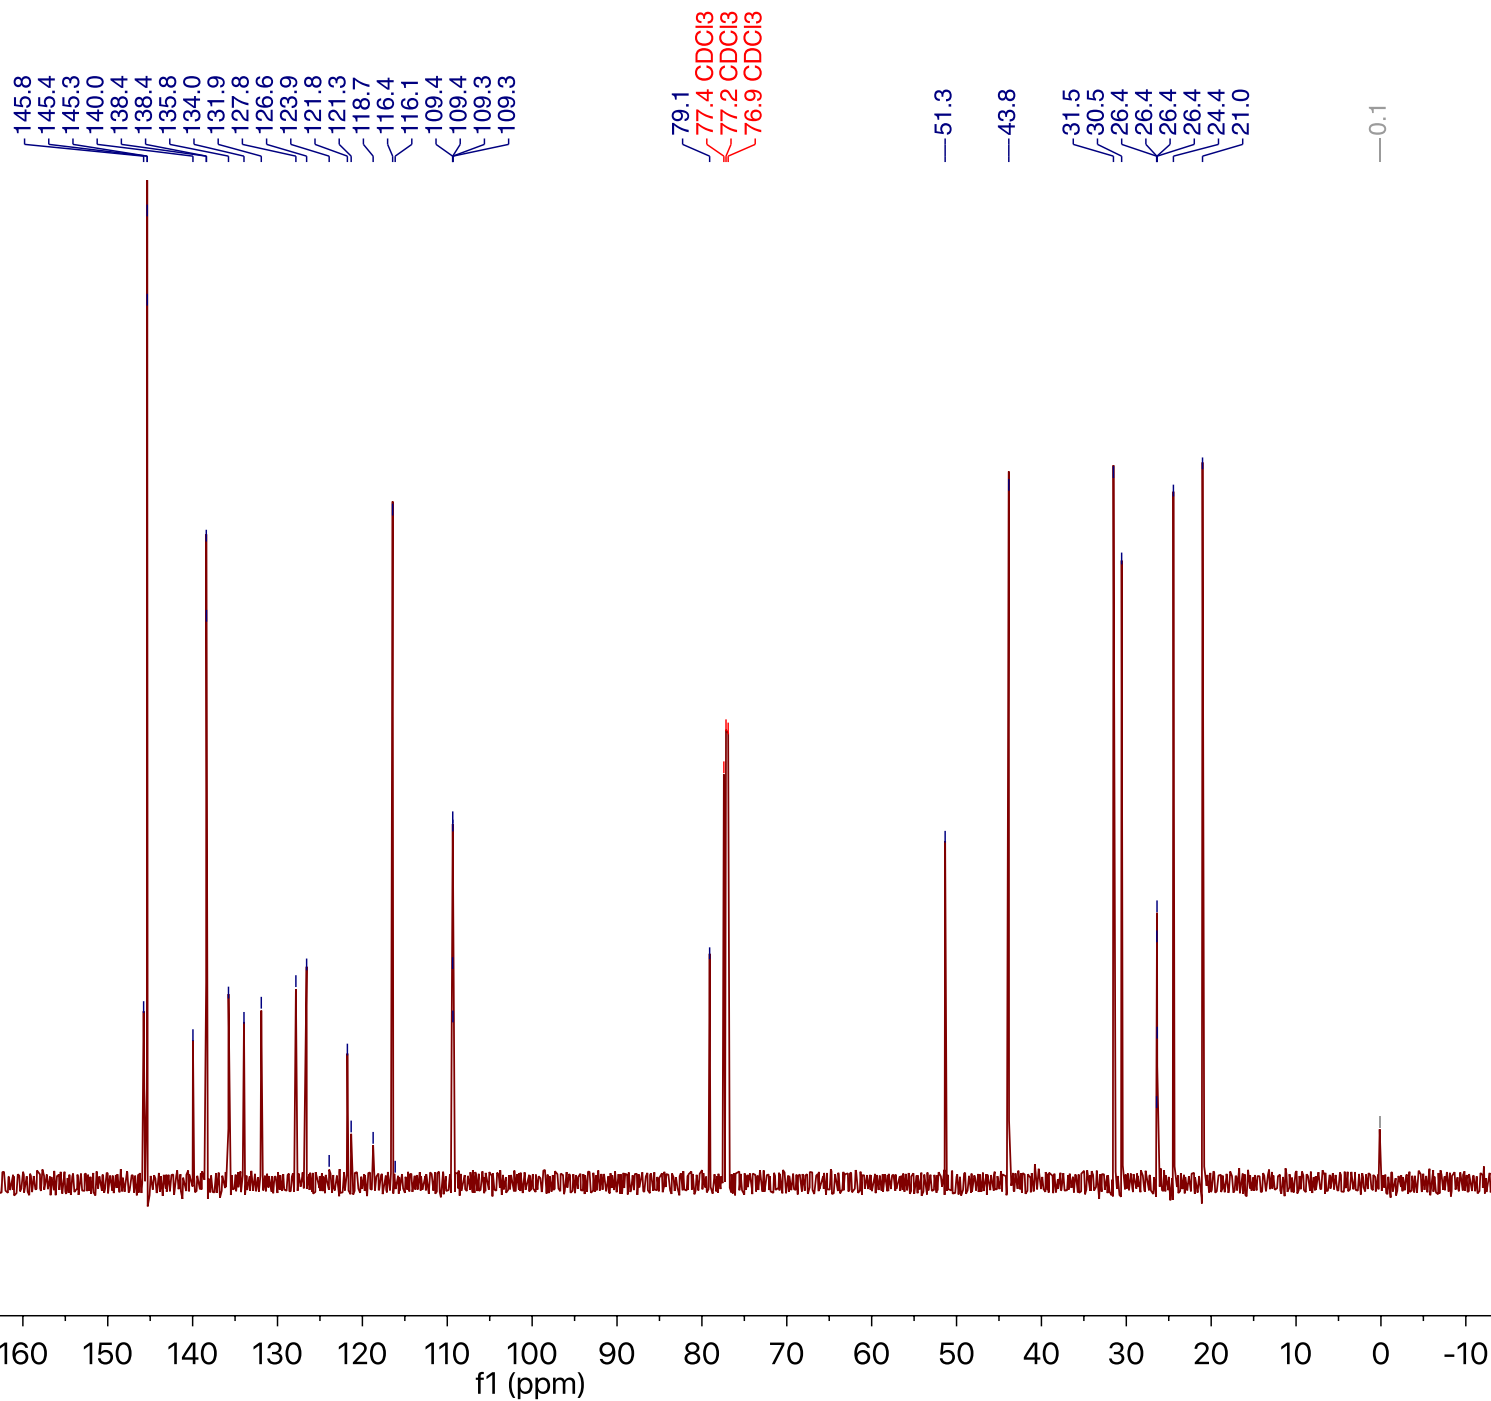

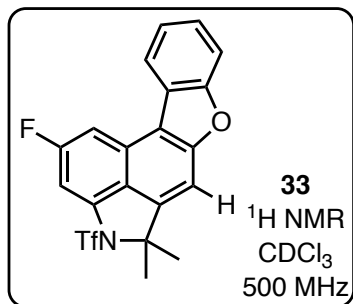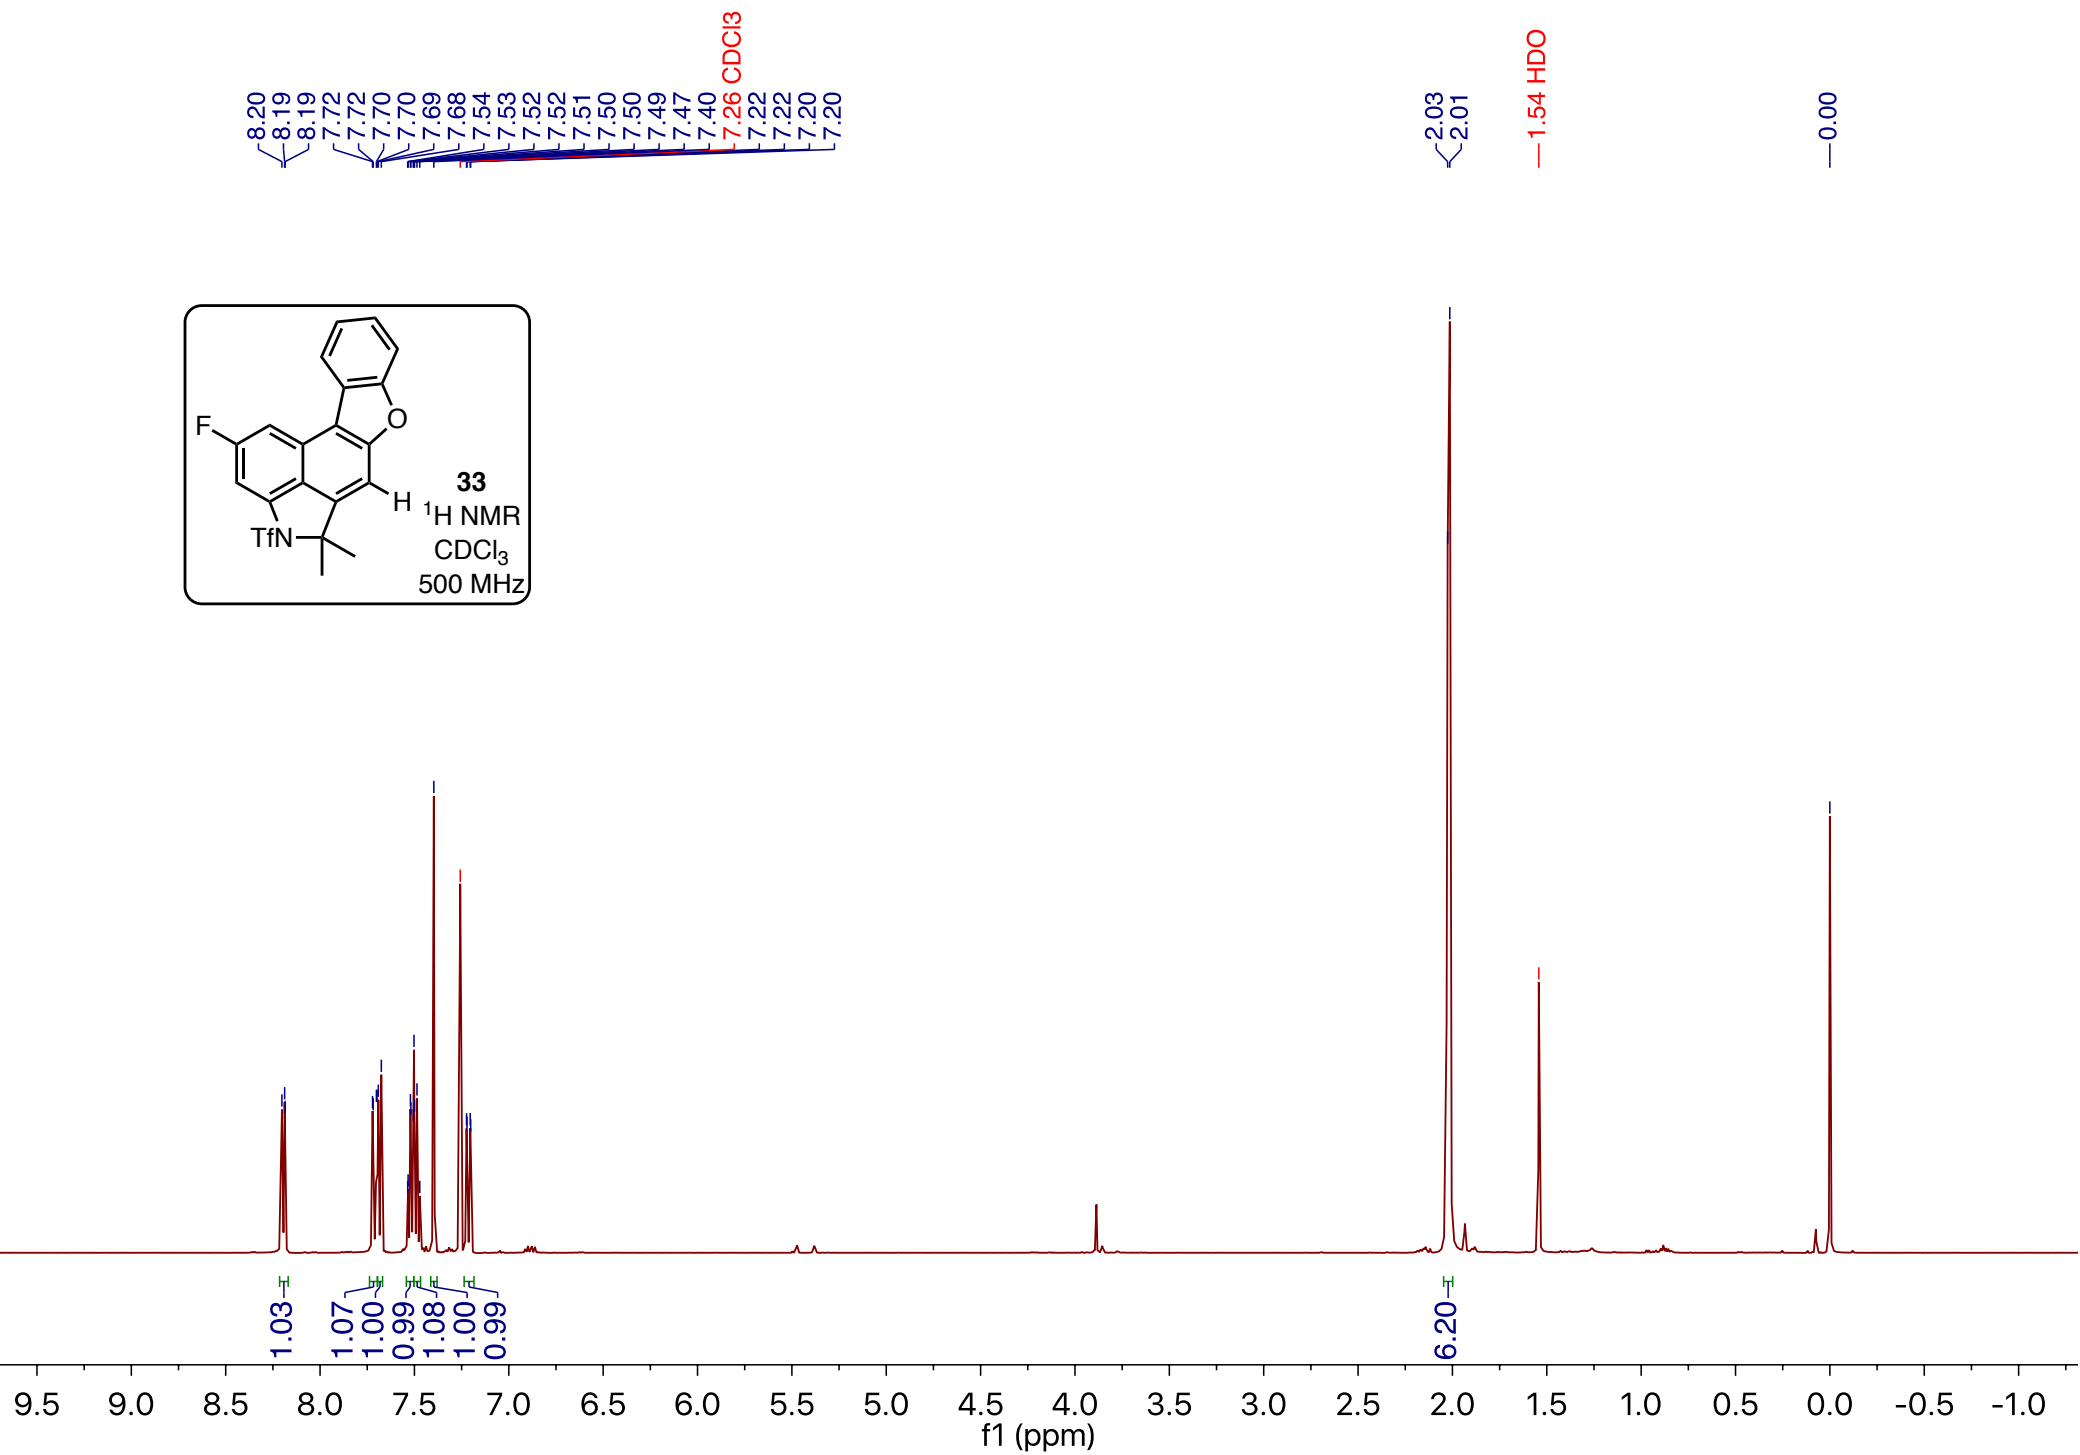

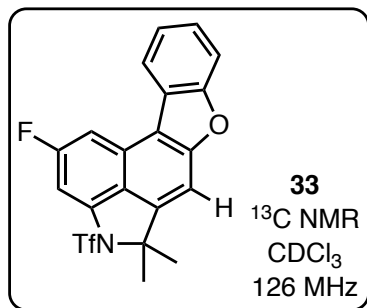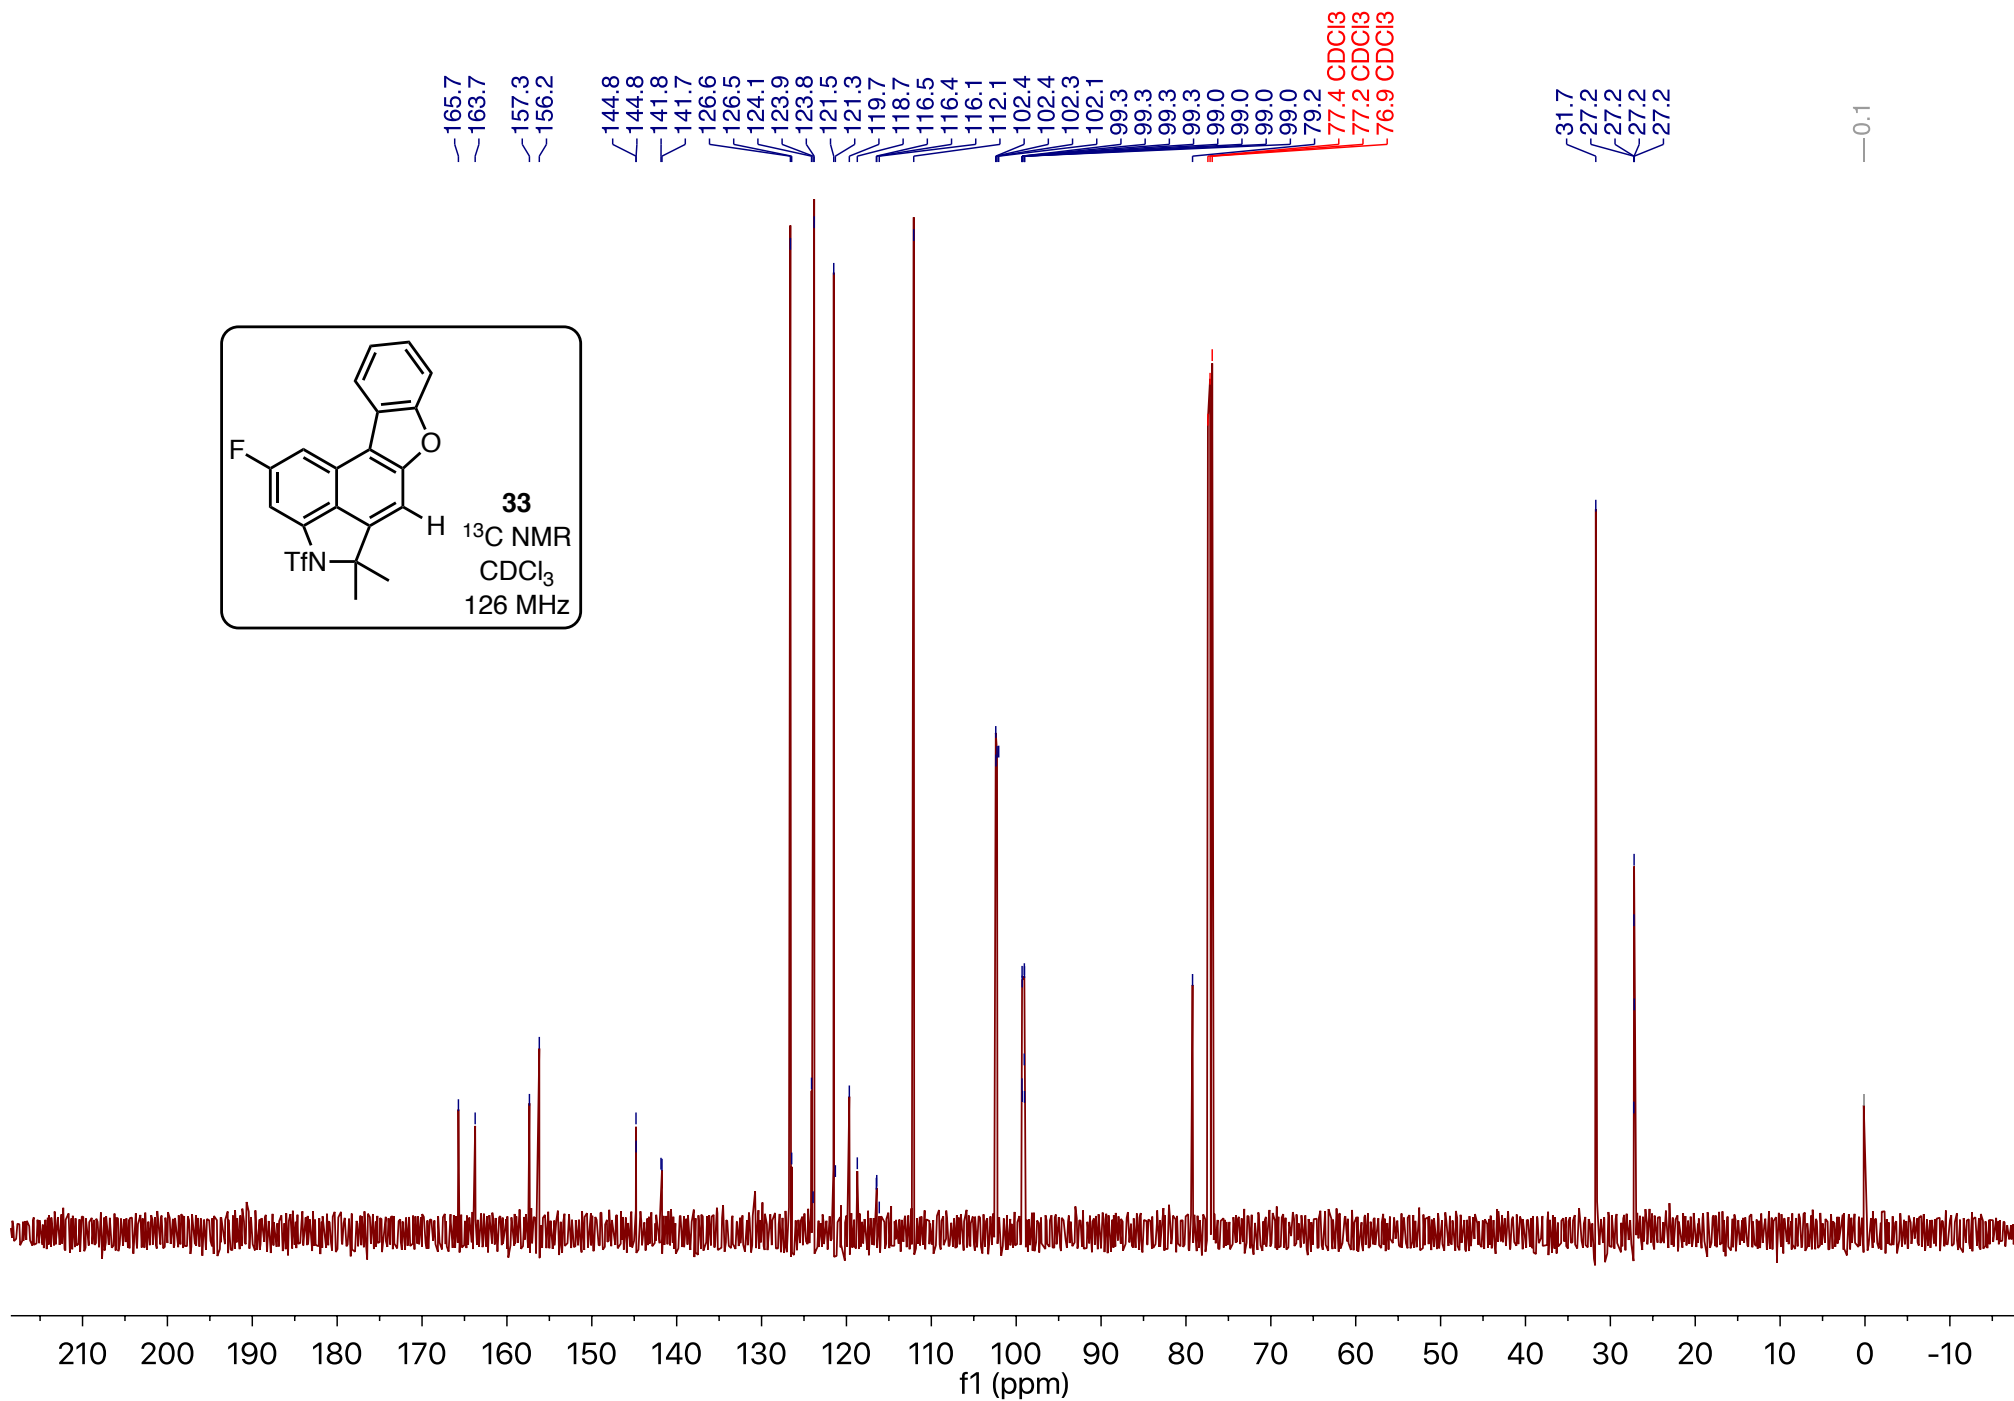

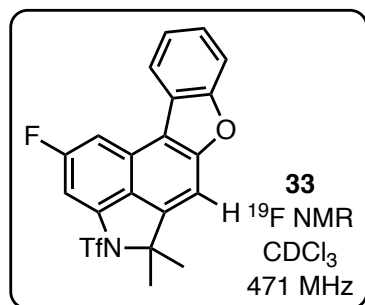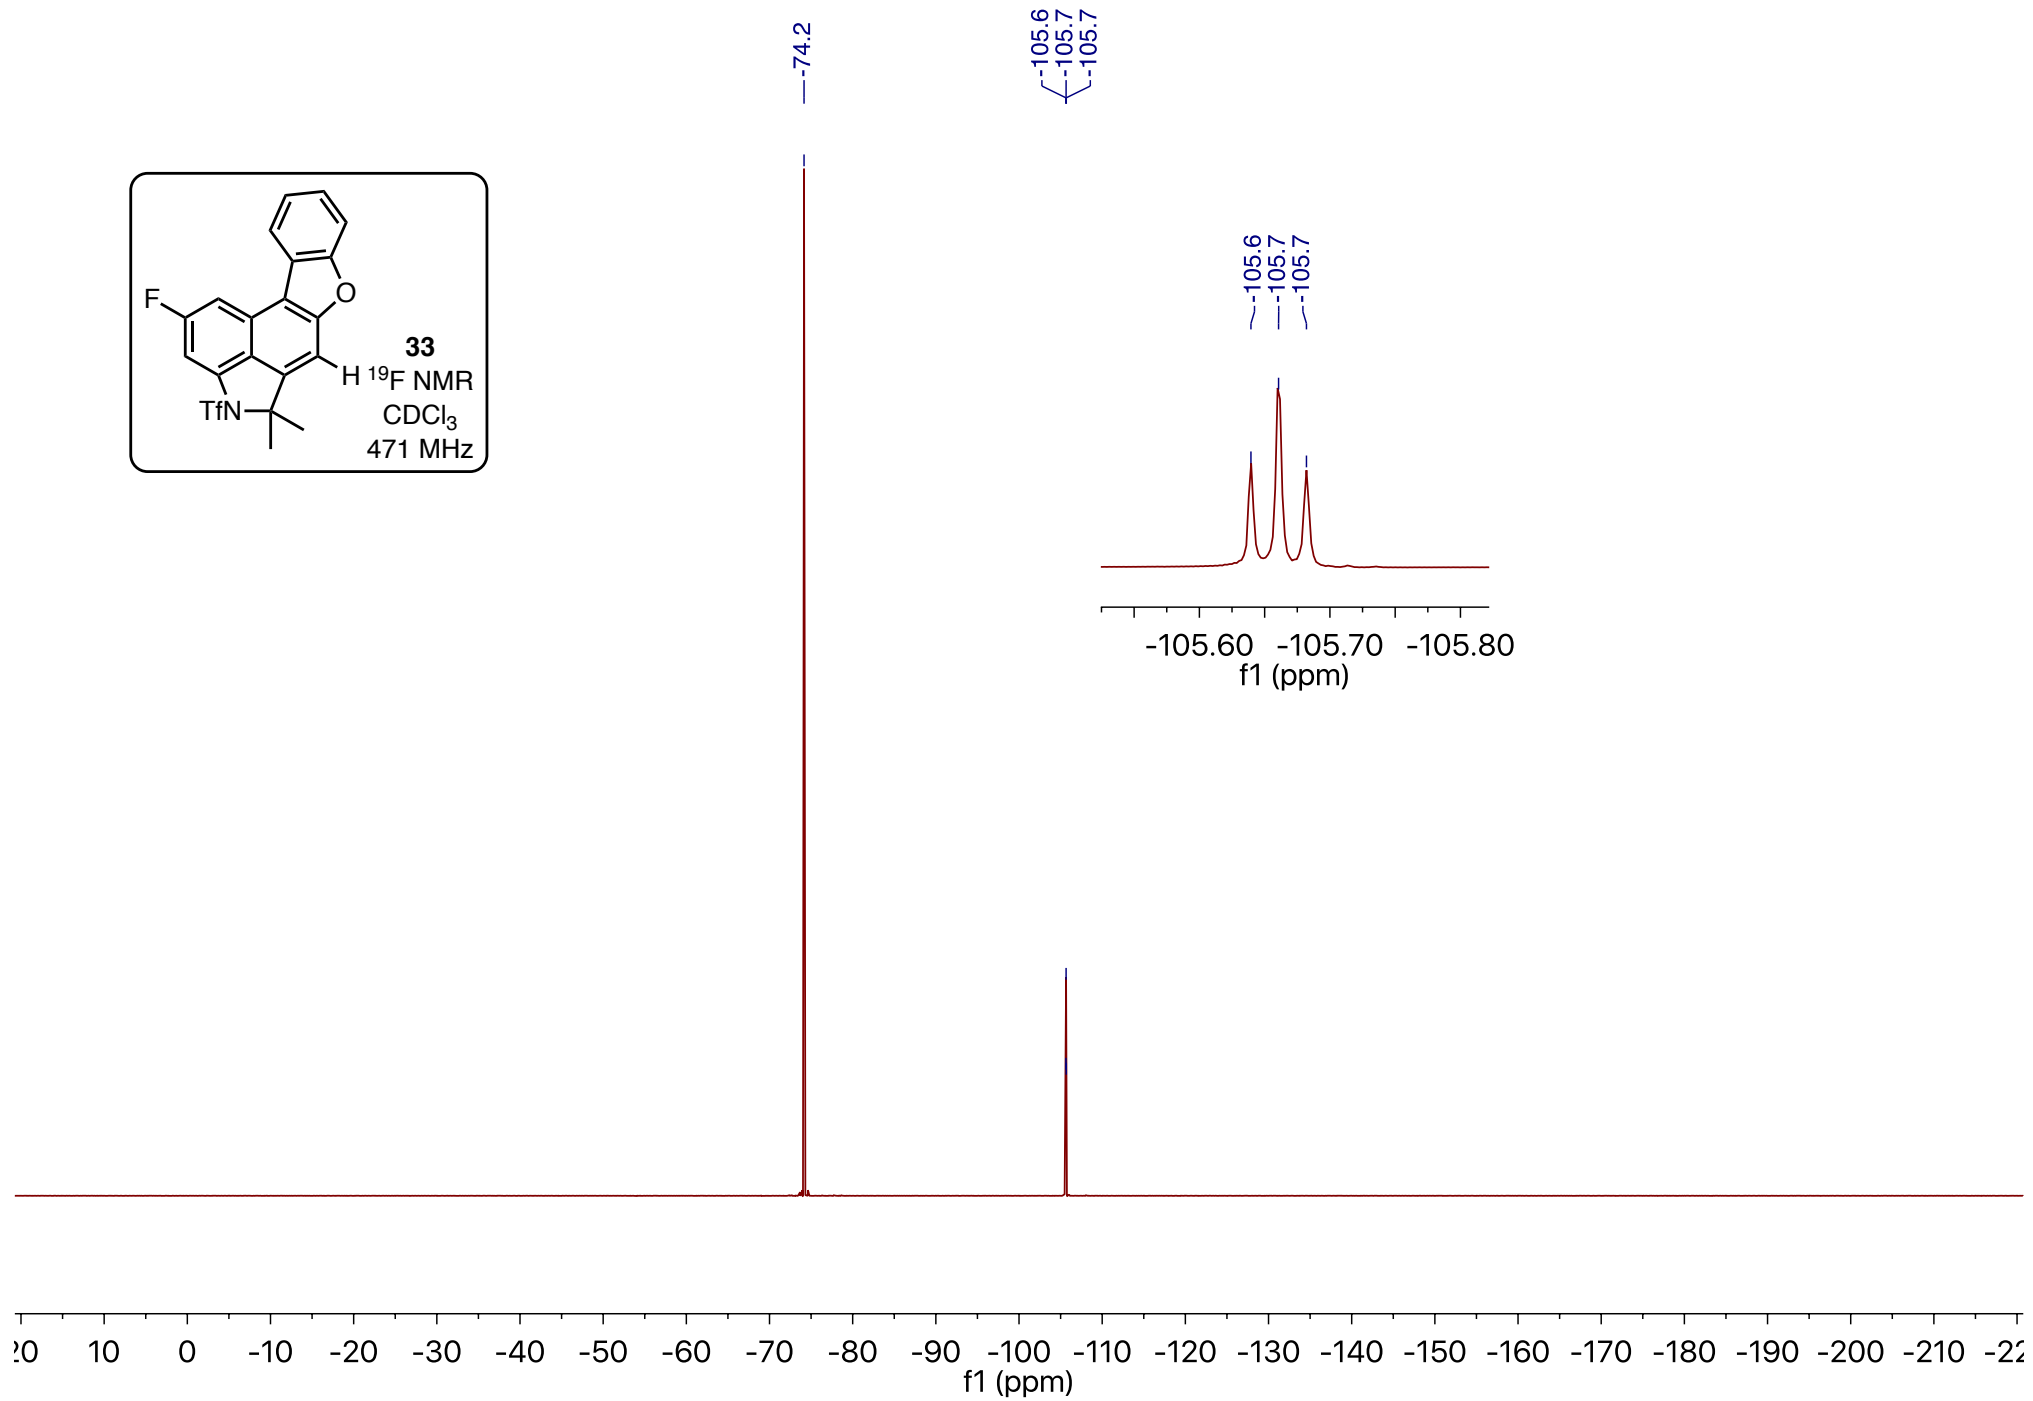

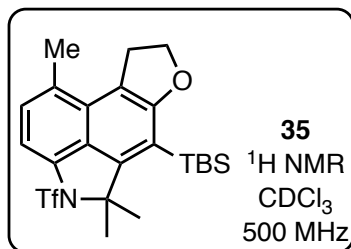7.25 CDCl<sub>3</sub>

7.16

7.14

7.00

6.99

4.62

4.61

4.59

4.57

4.55

4.53

3.75

3.74

3.72

3.72

3.71

3.70

3.69

3.68

3.67

3.65

2.66

2.02

2.00

1.54 H<sub>2</sub>O

0.93

0.53

0.49

-0.00

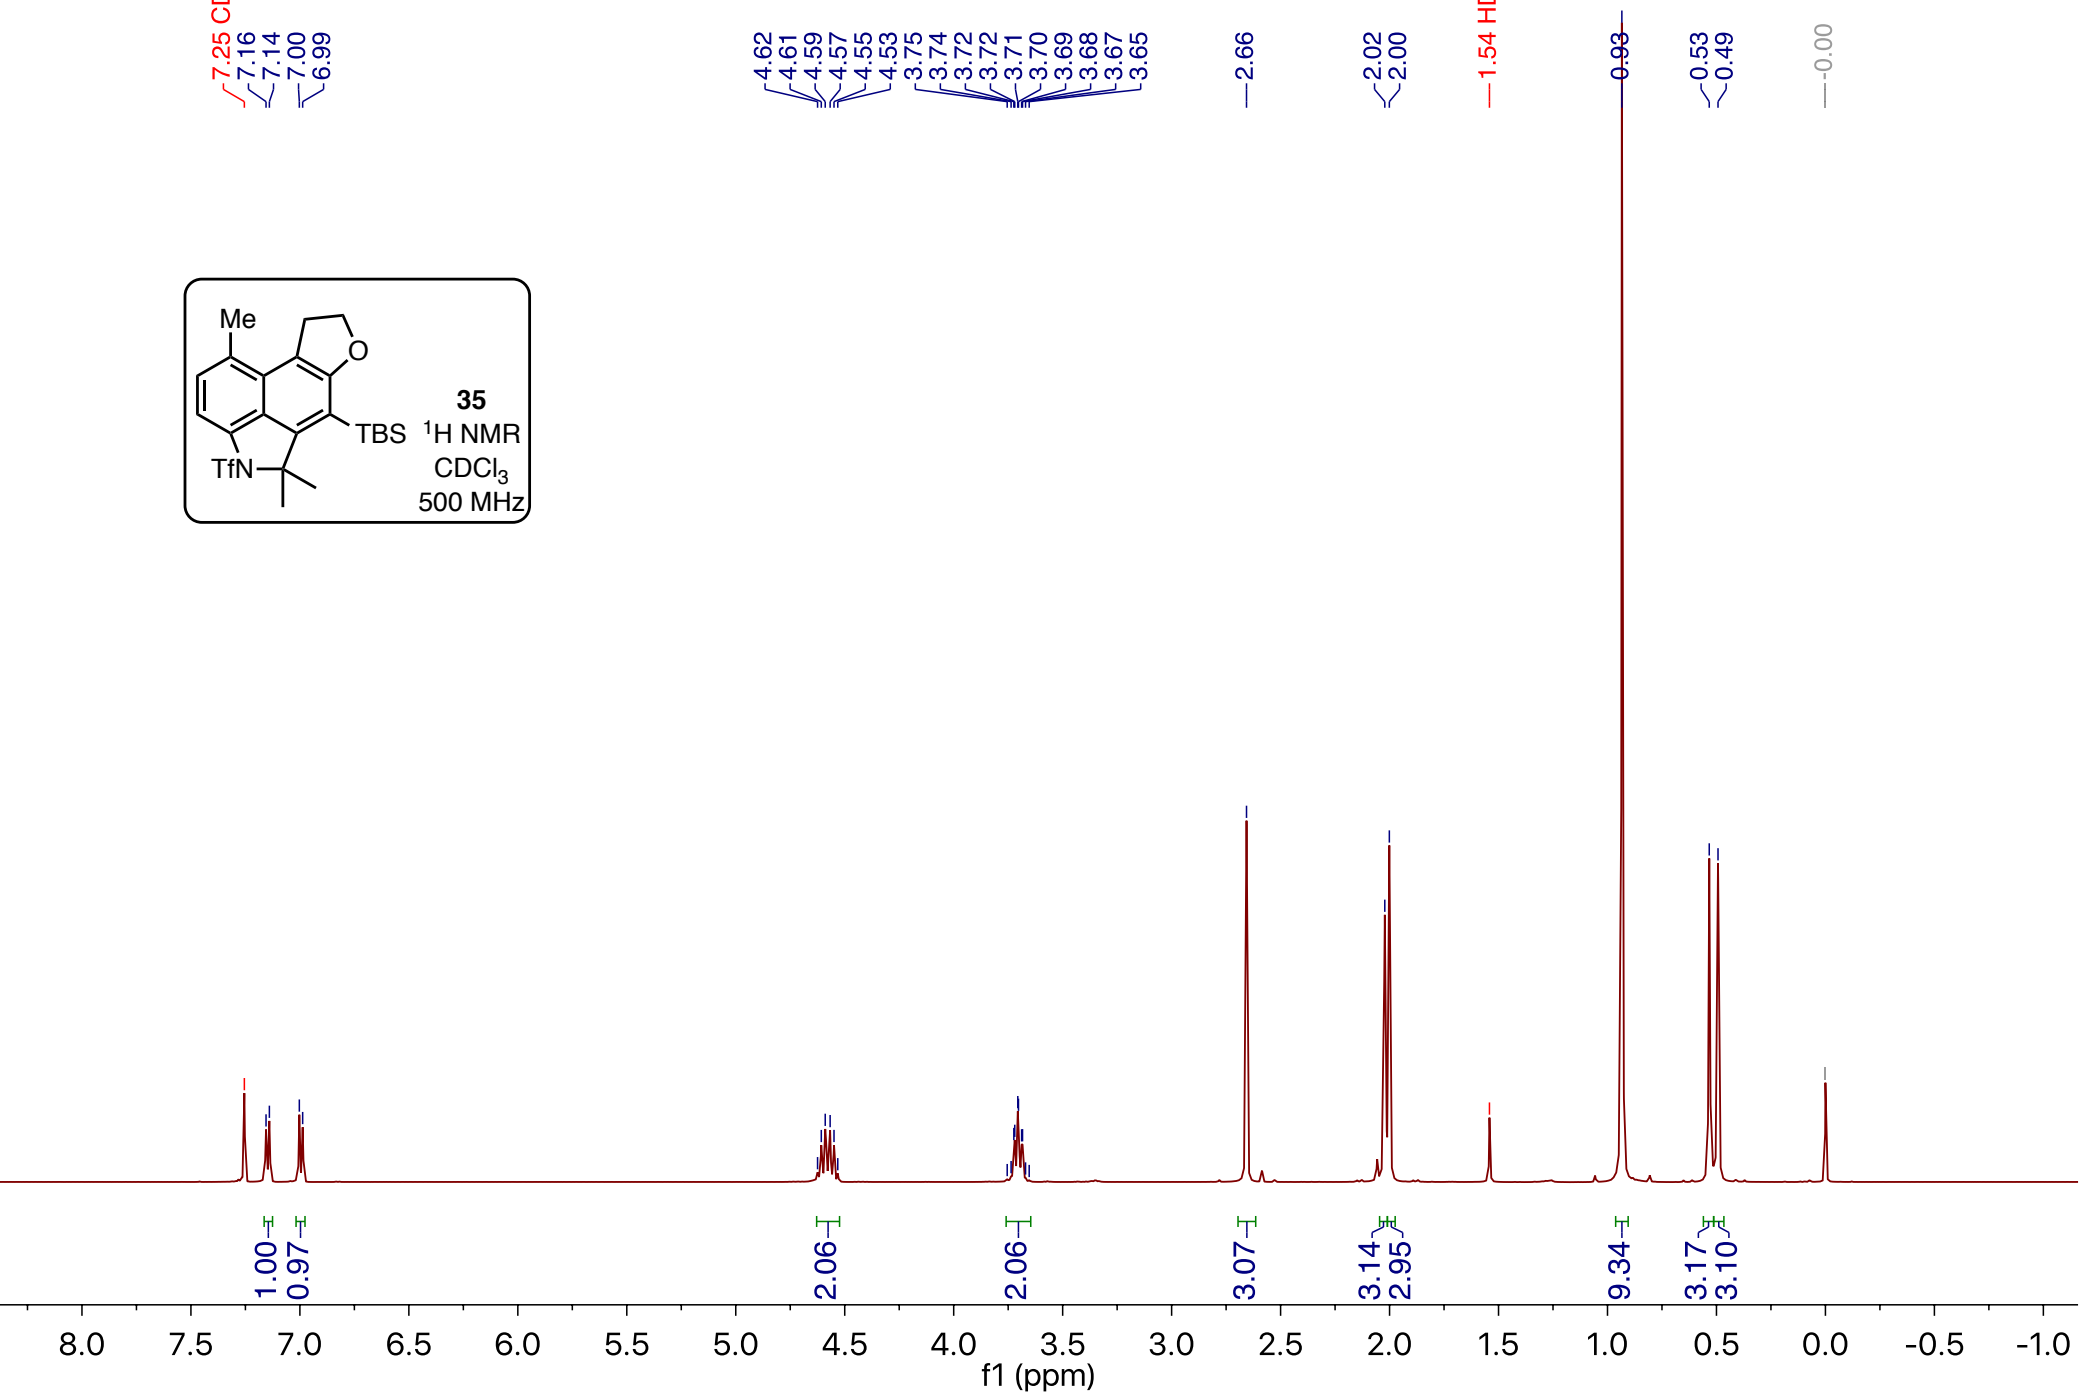

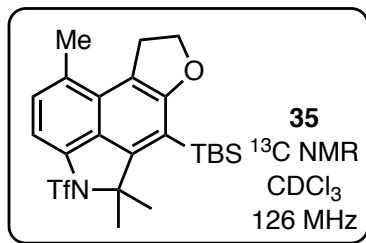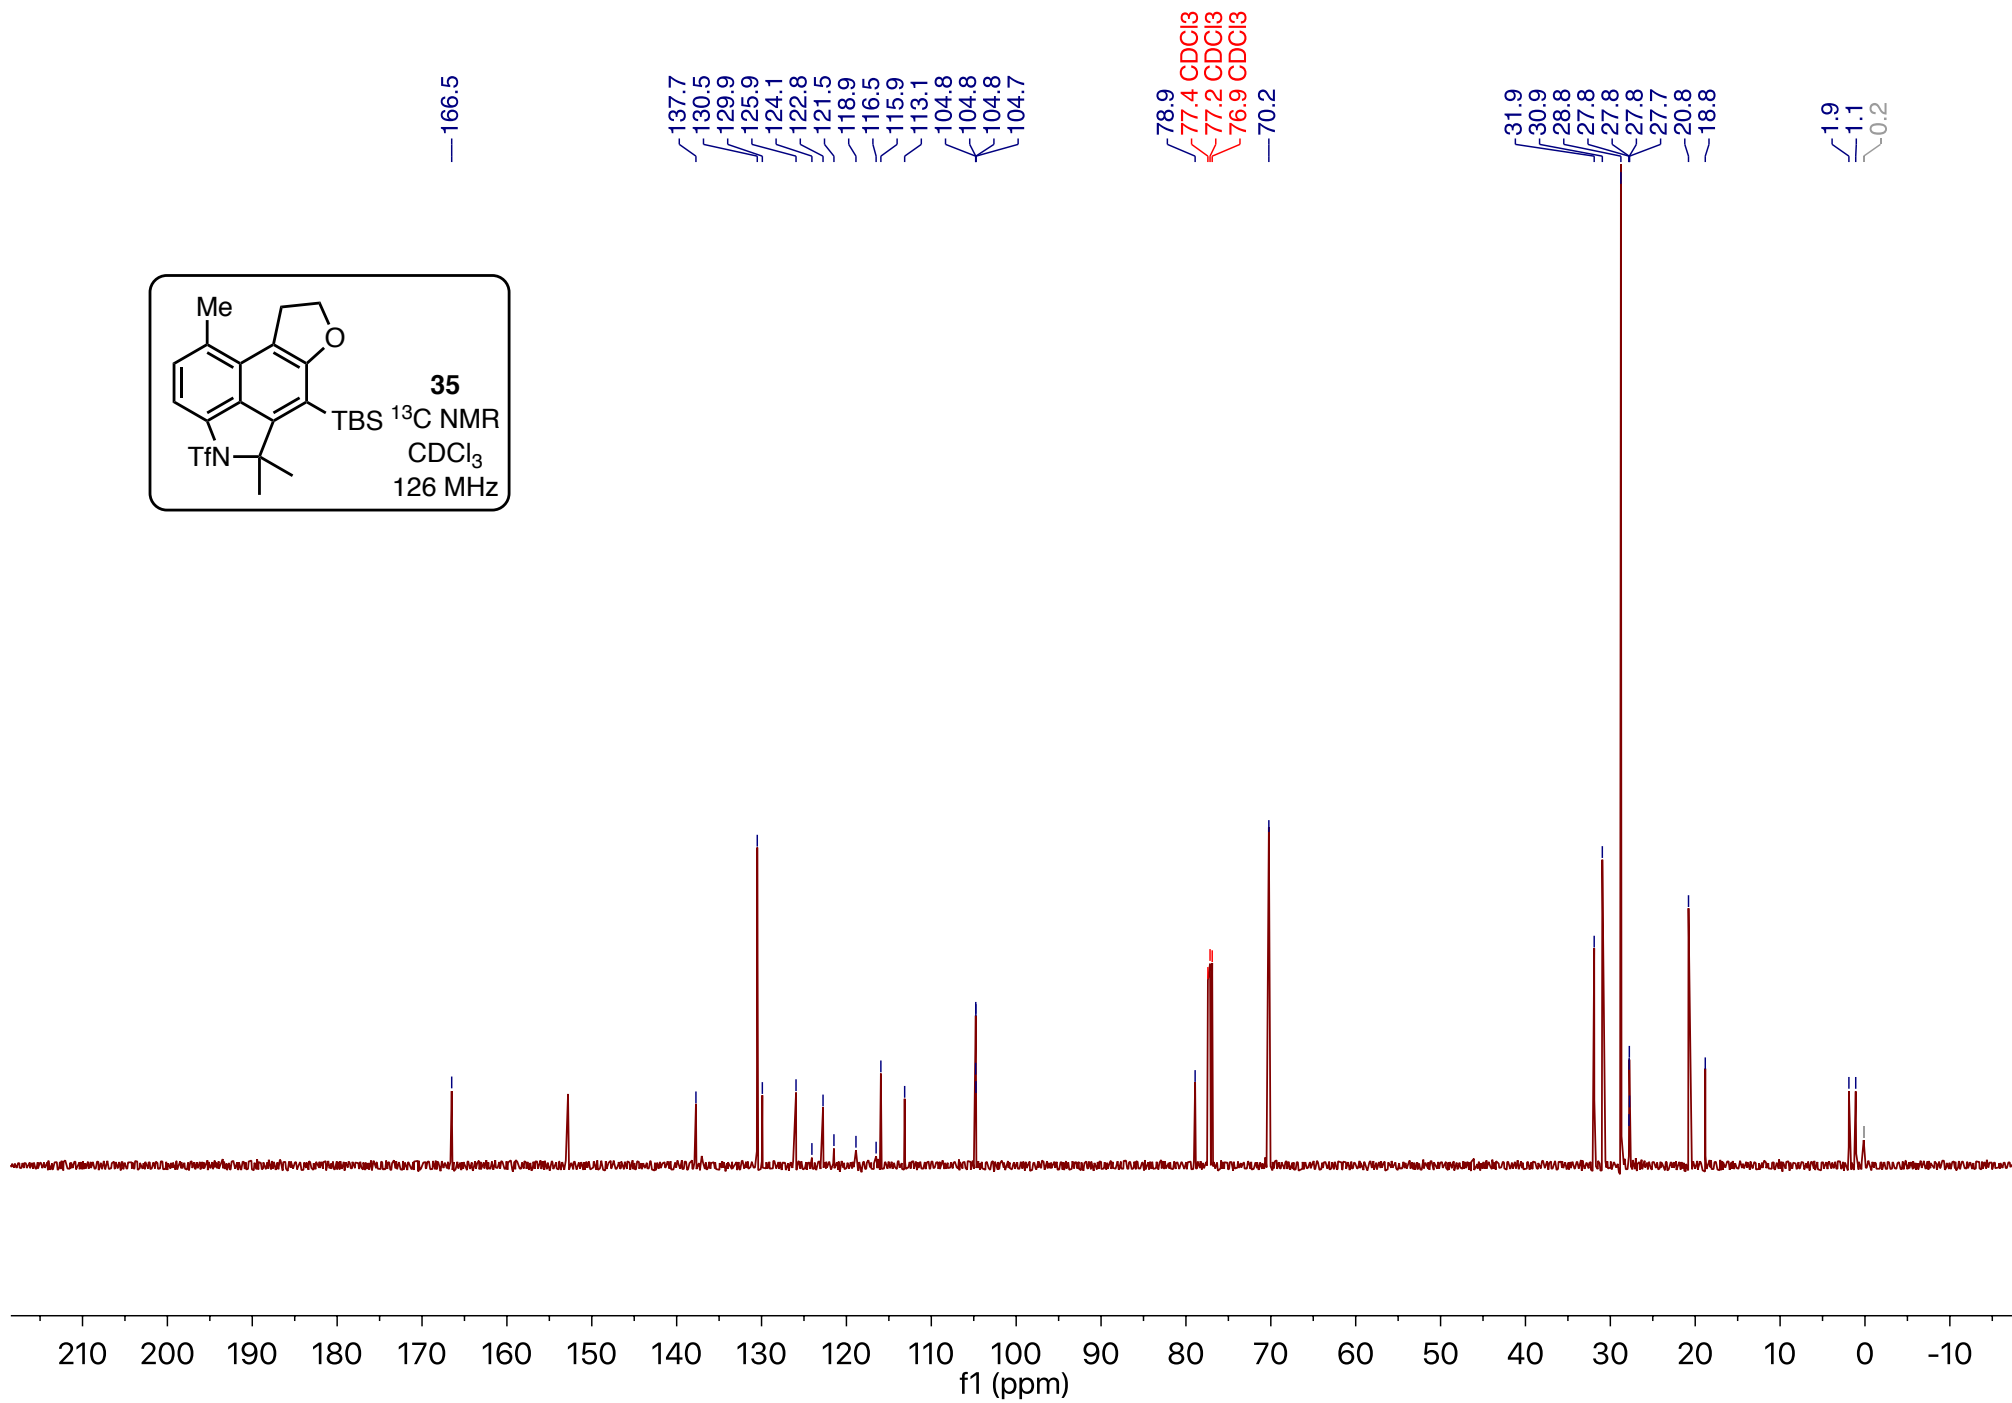

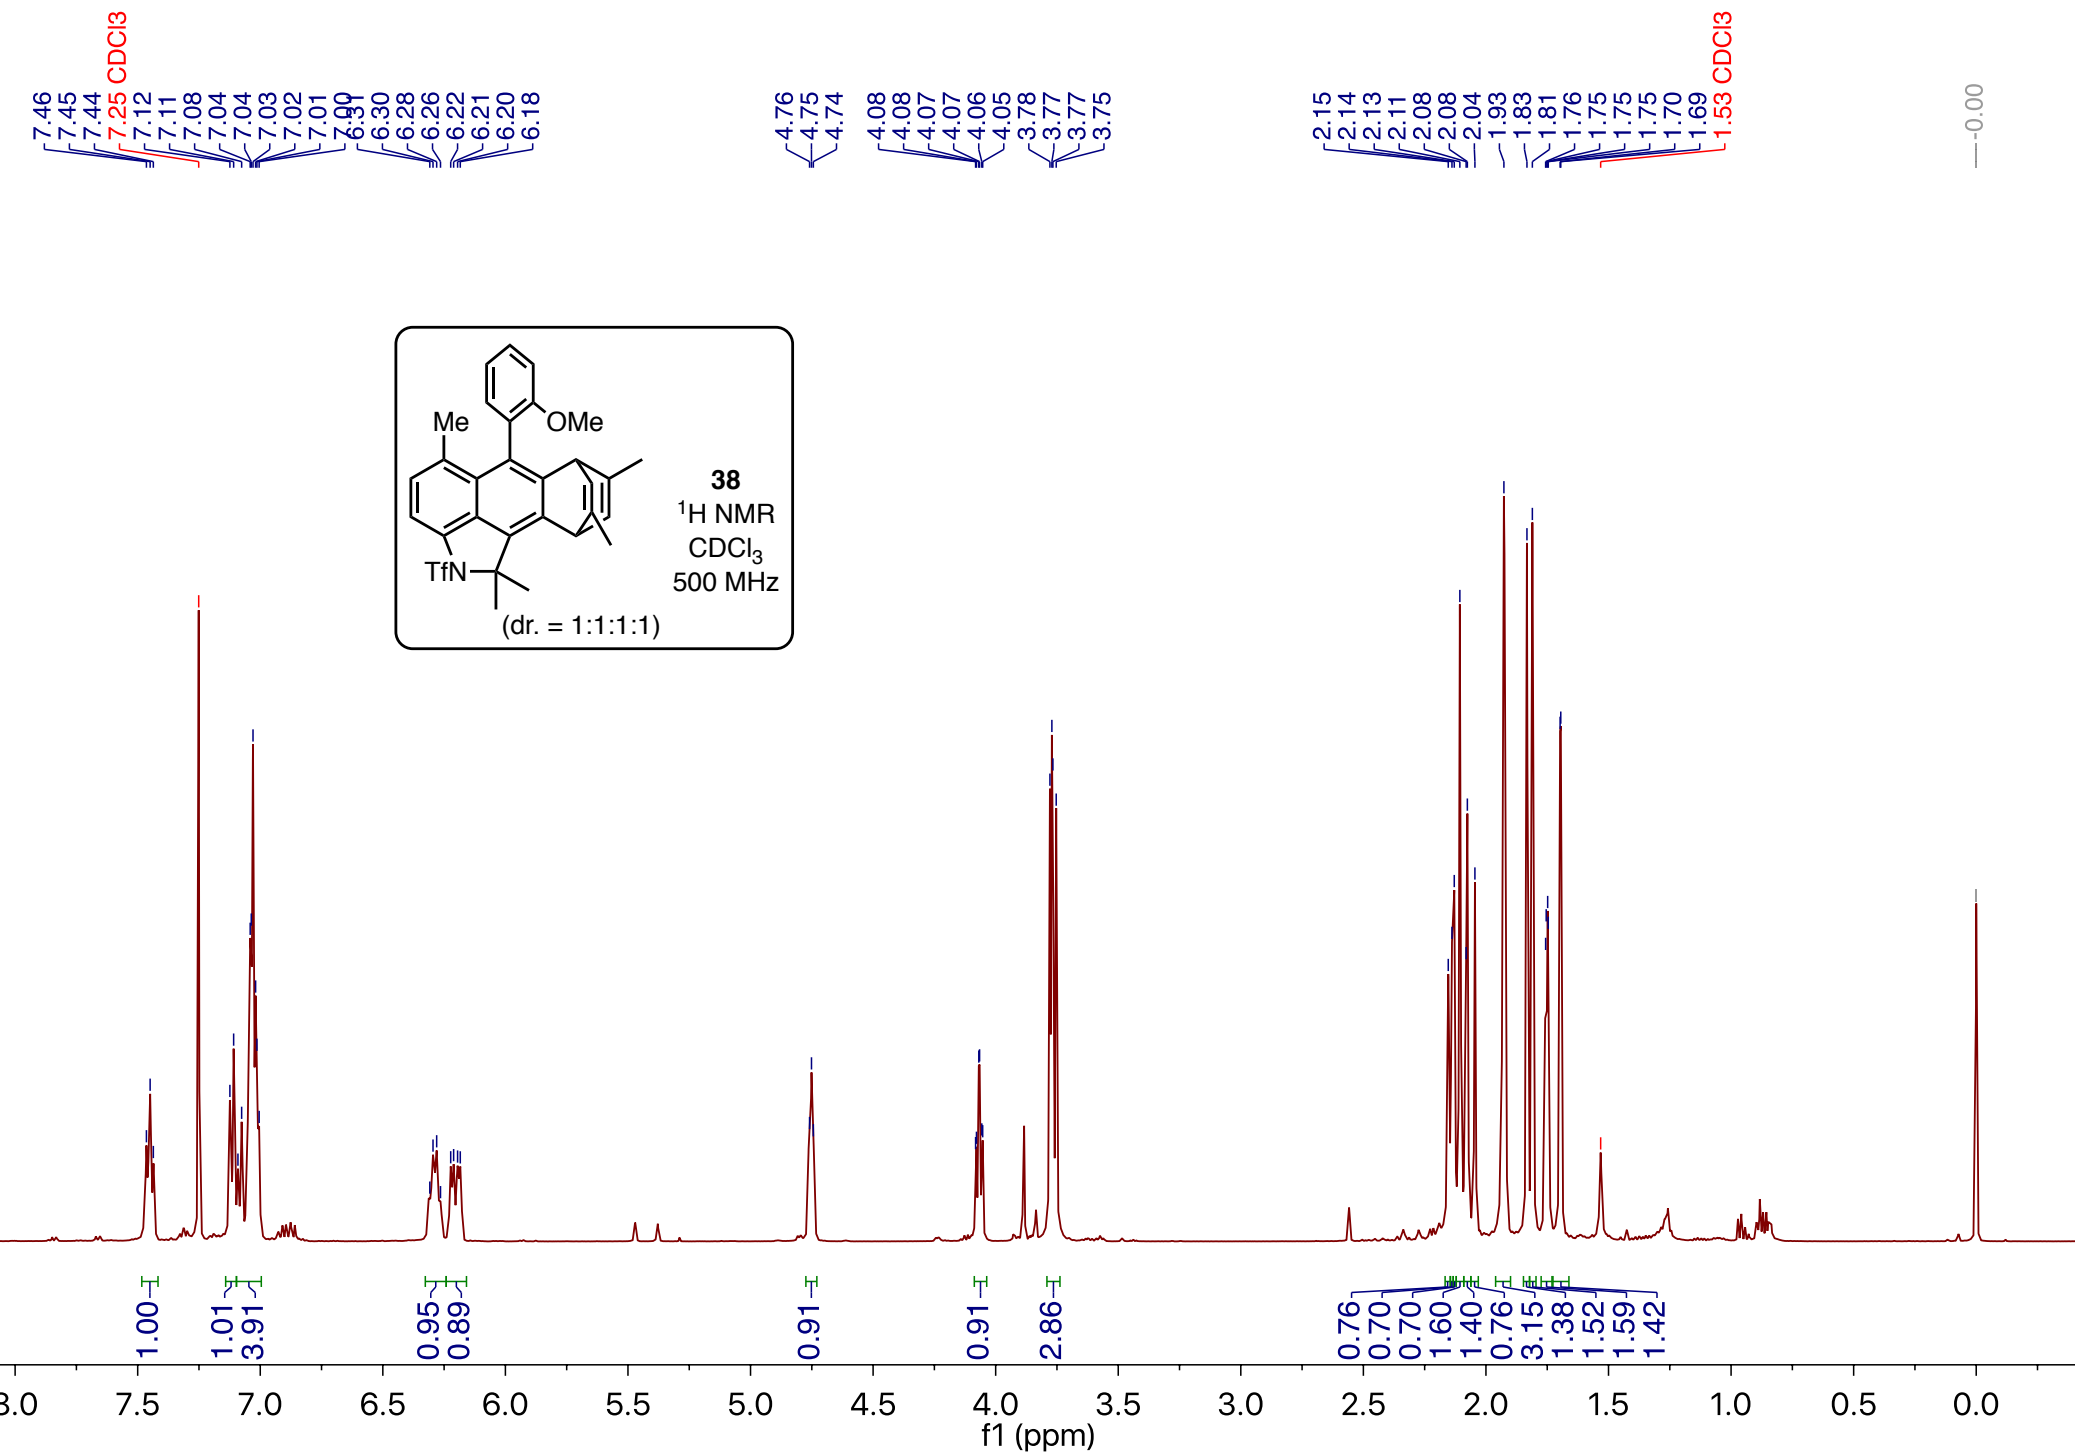





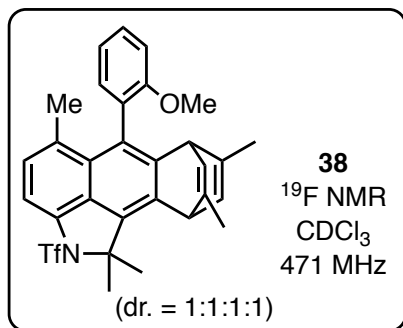

-73.9  
-74.0  
-74.1  
-74.2

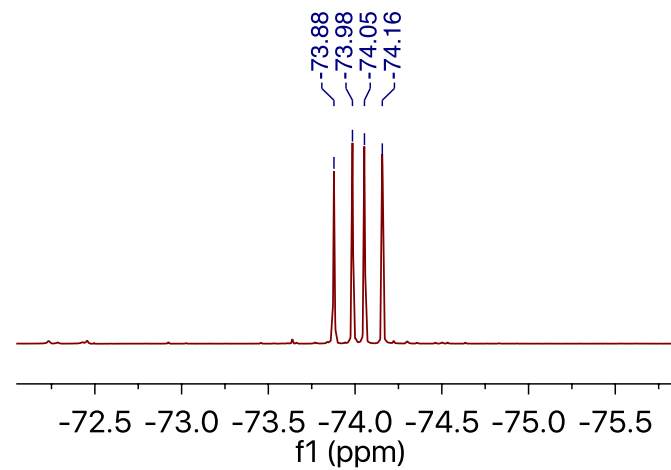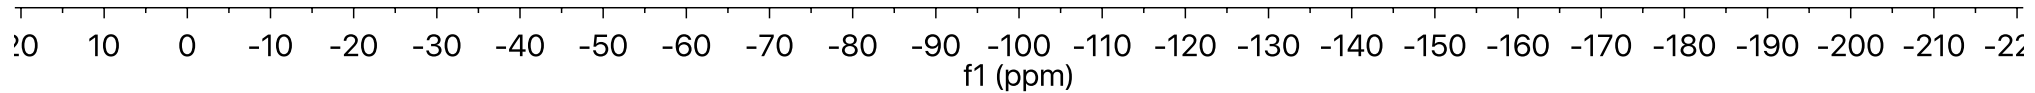

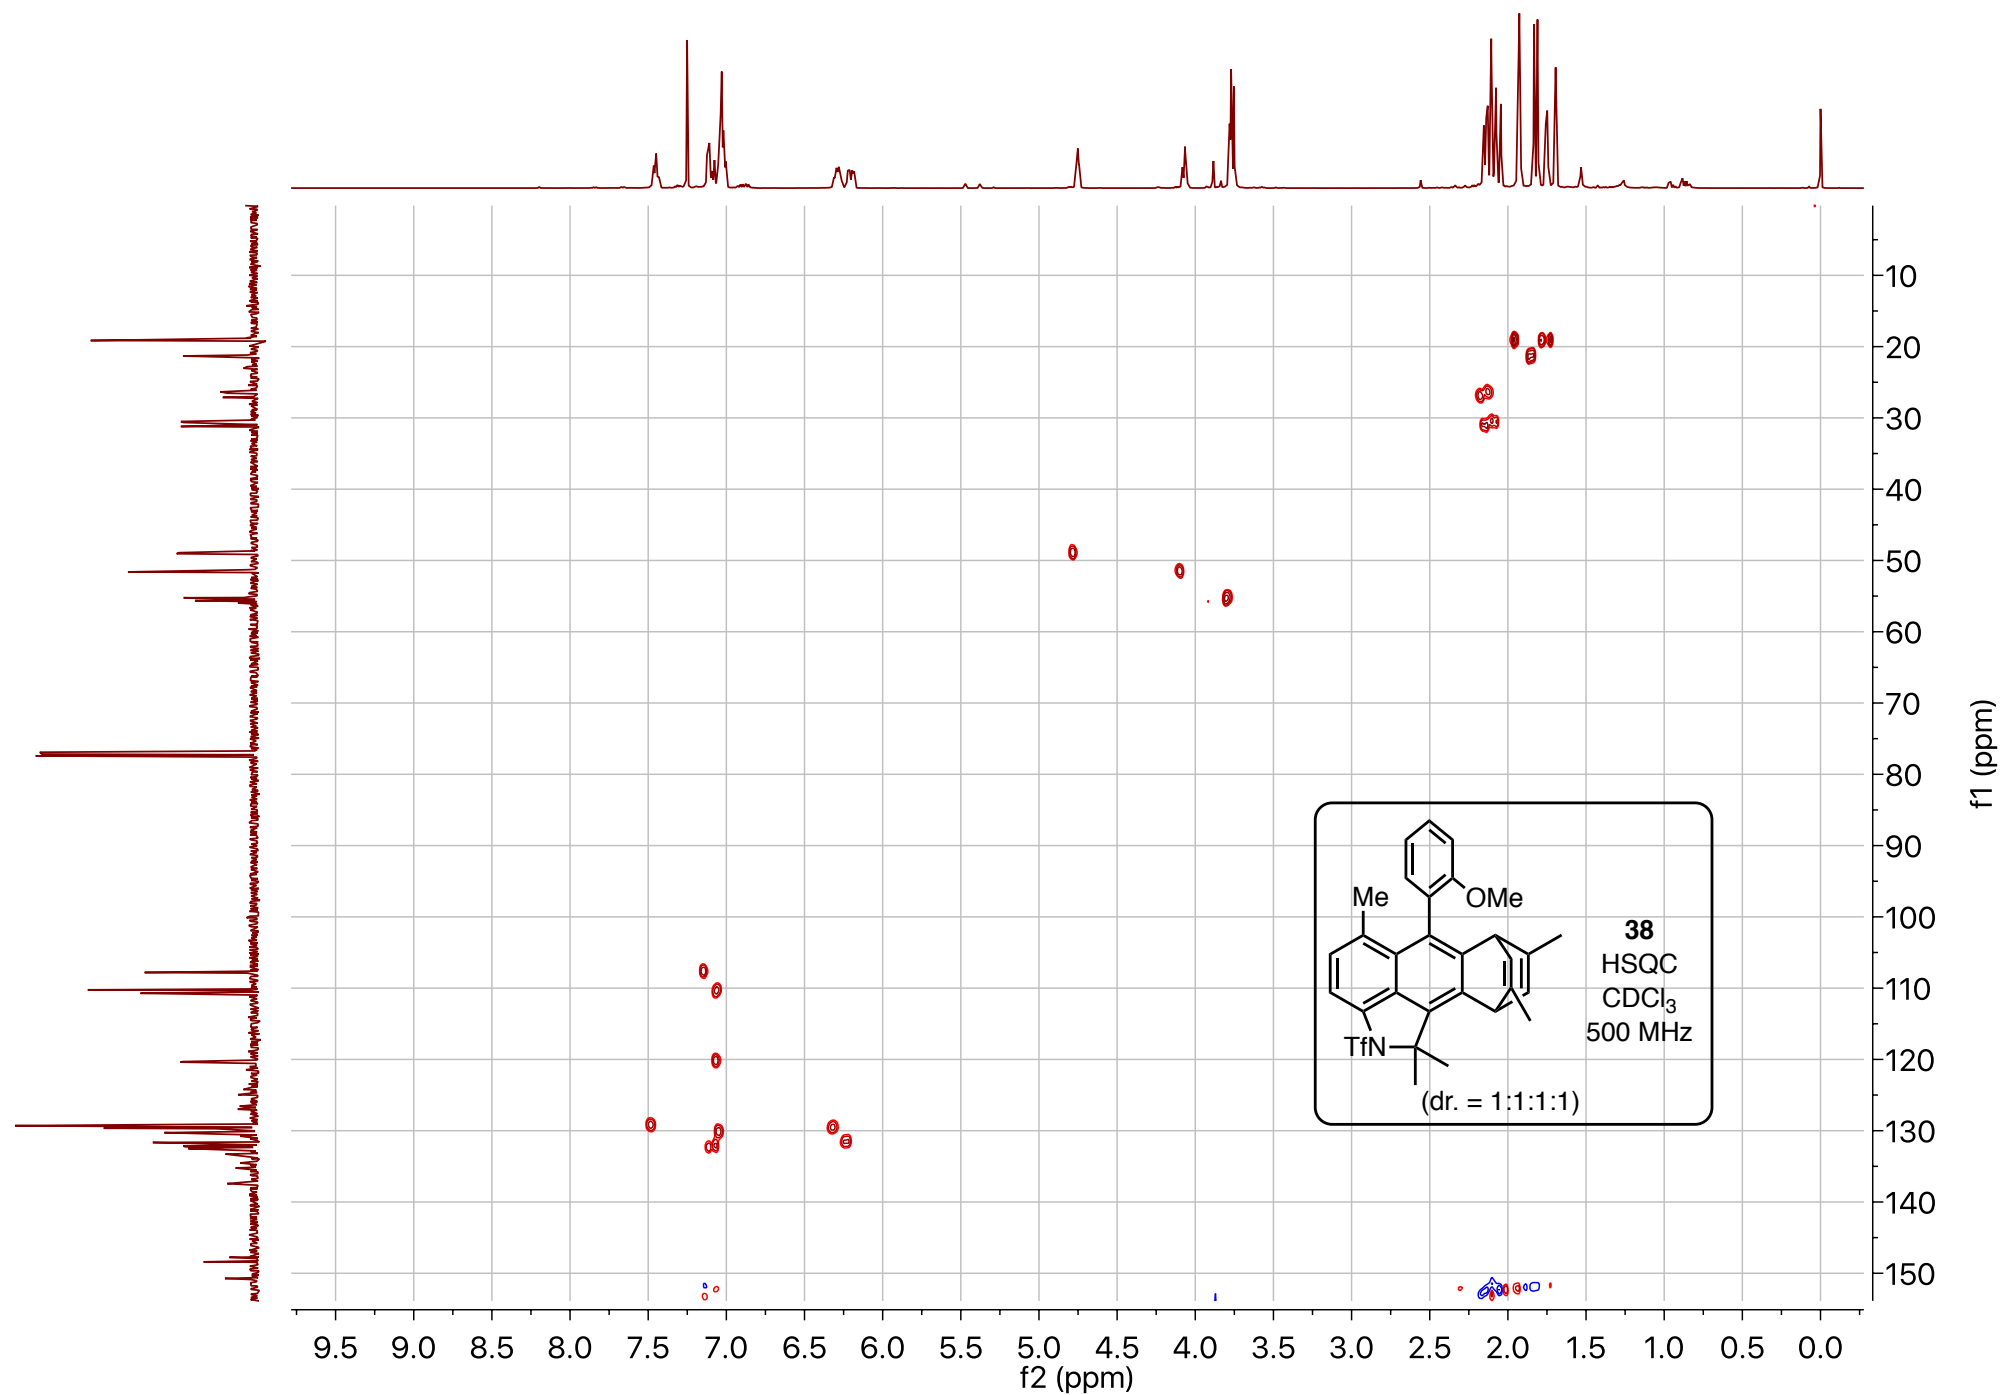

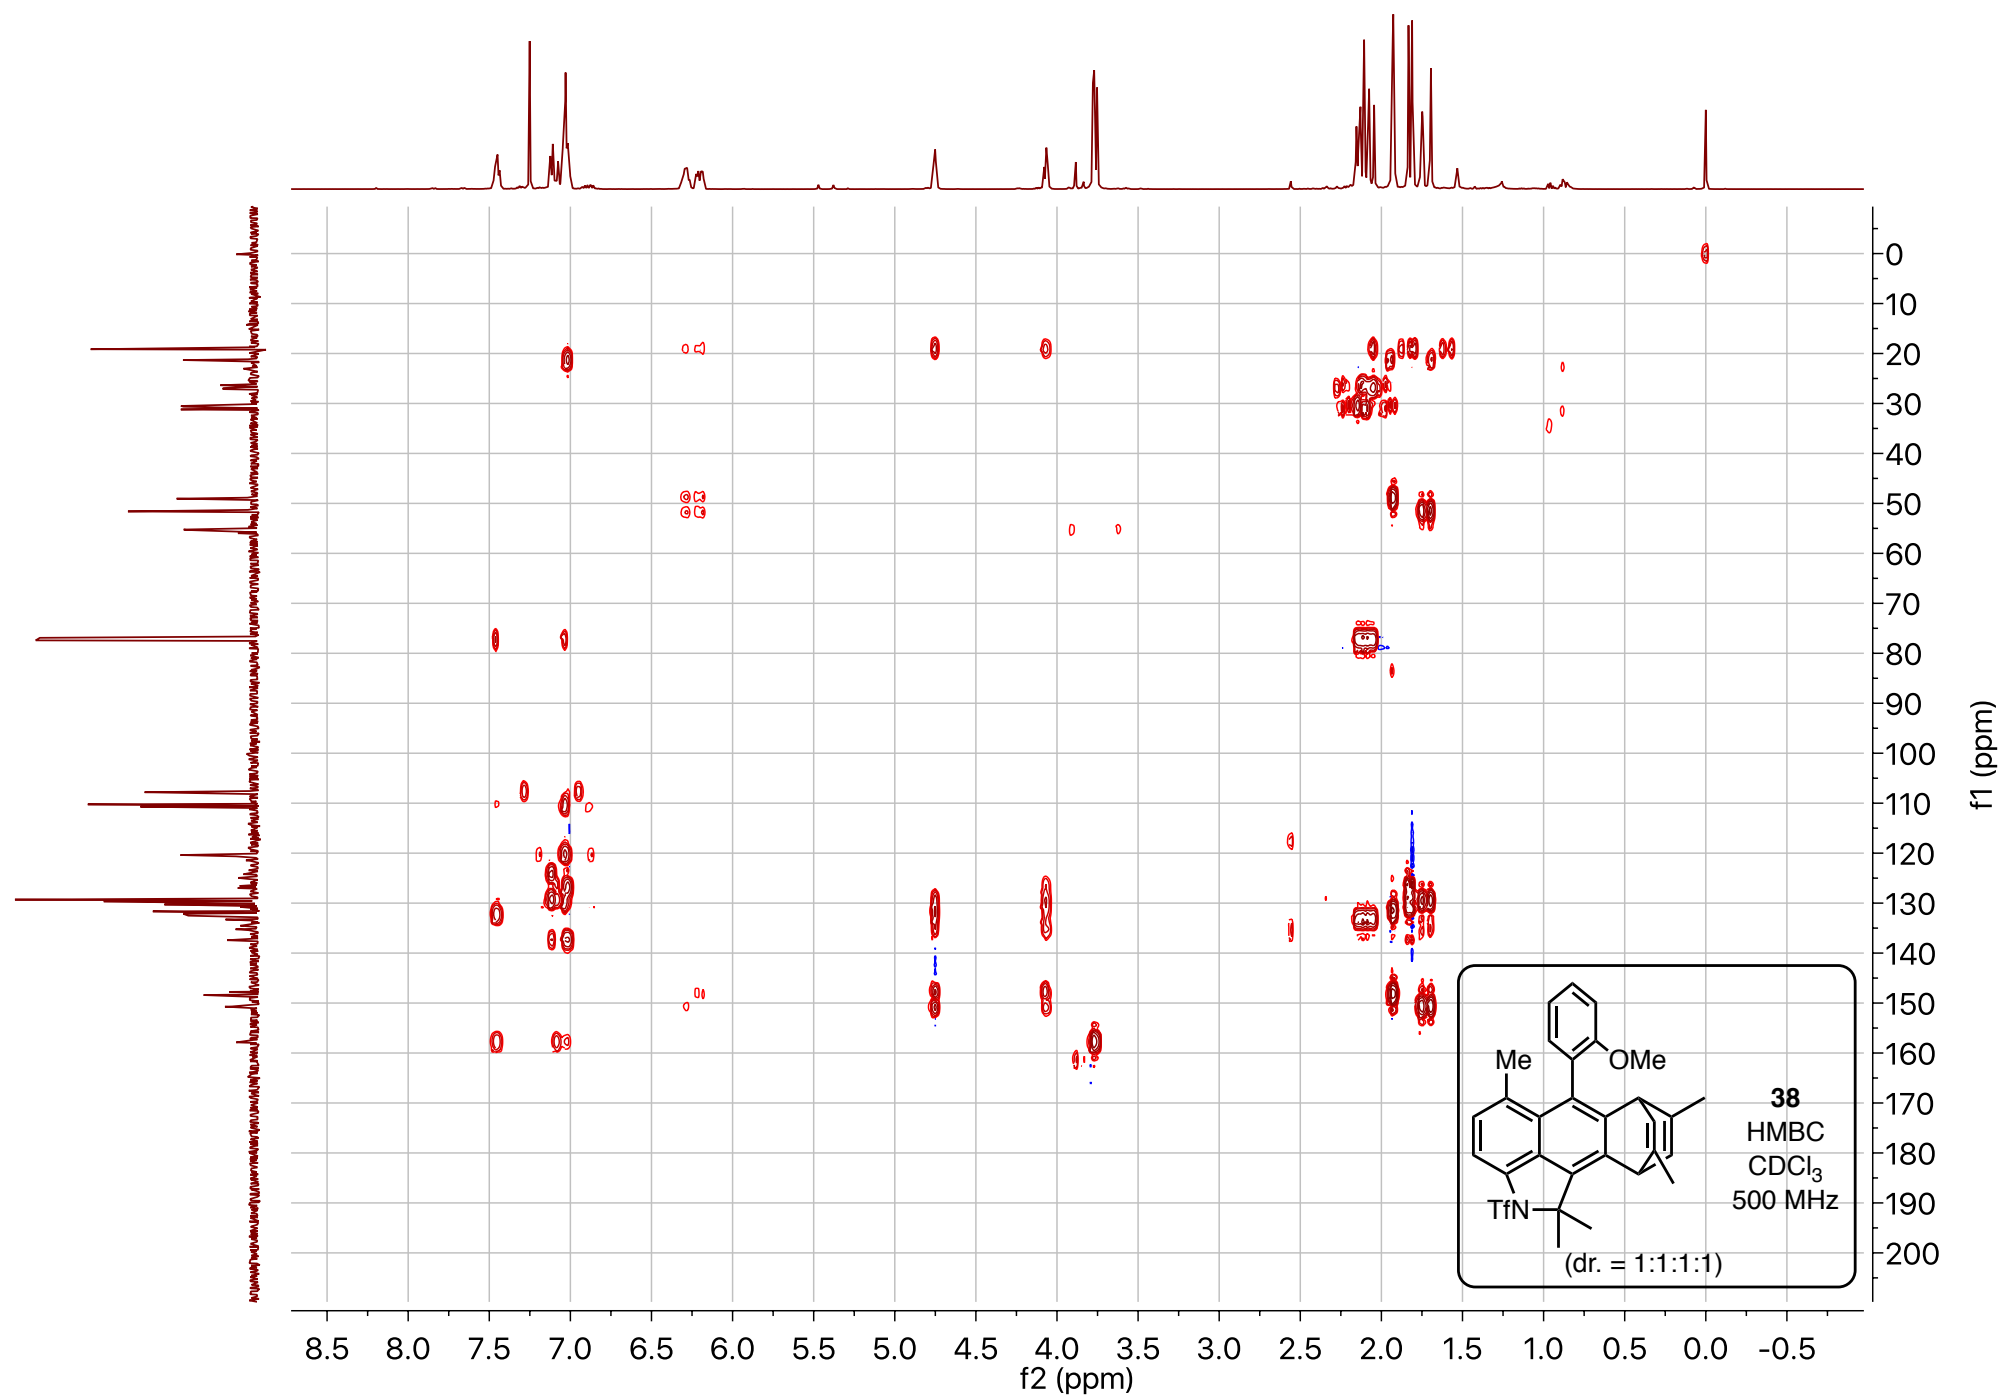

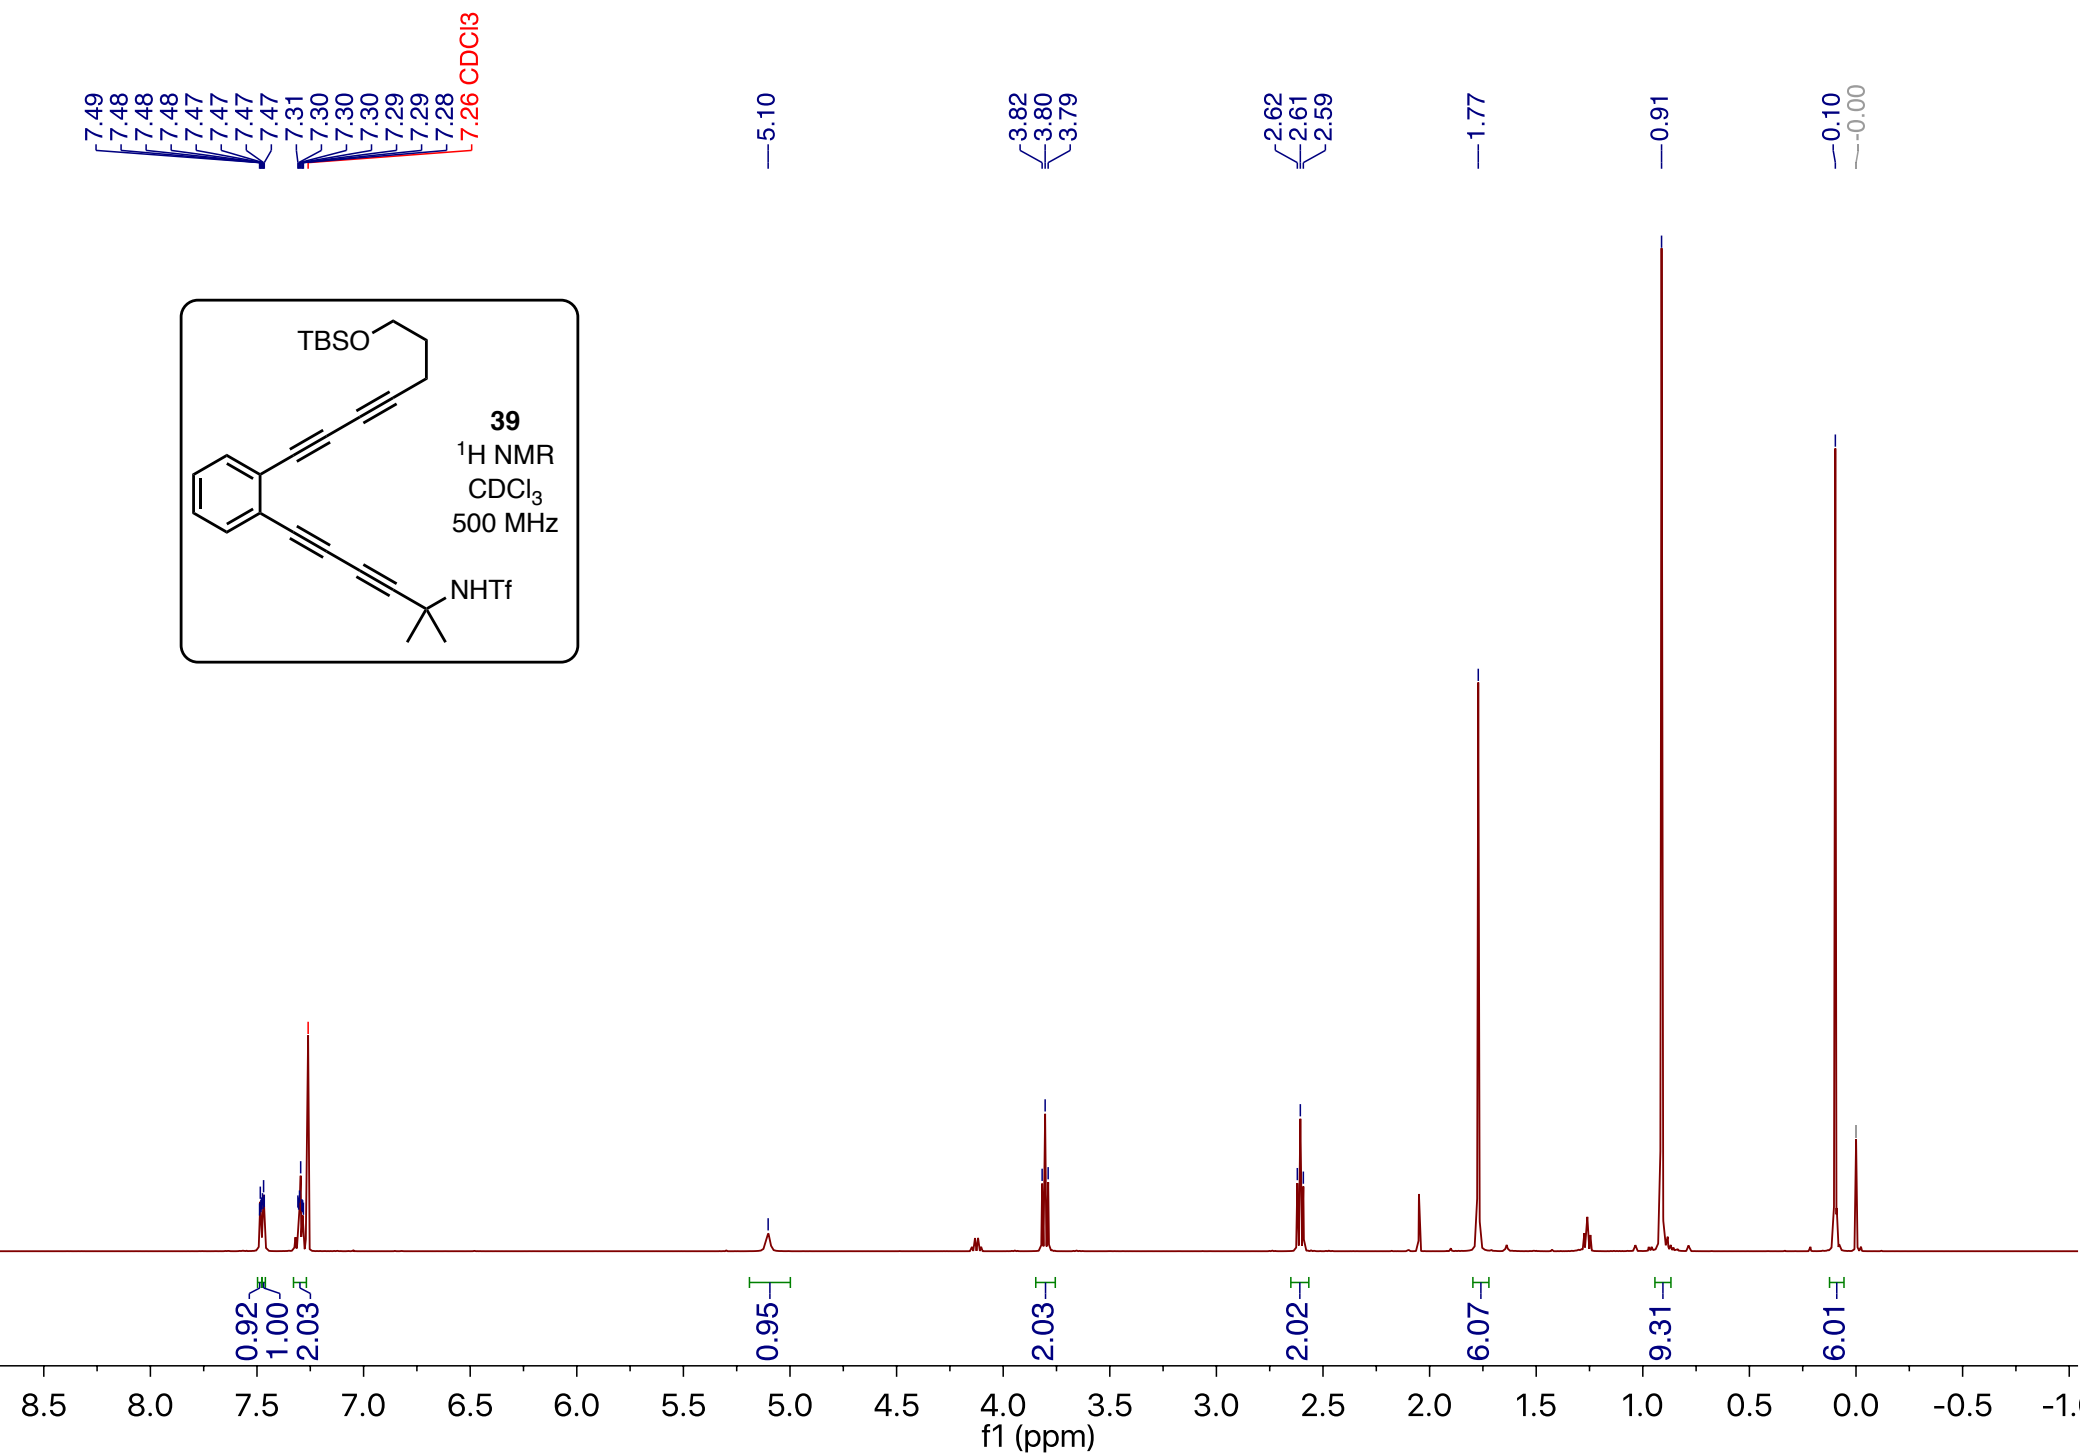

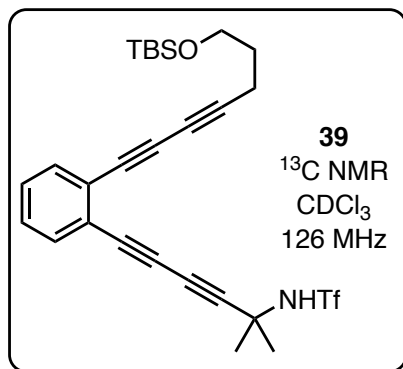

133.5  
133.4  
129.2  
128.7  
125.9  
124.7  
123.0  
120.5  
118.0  
115.4

83.7  
83.6  
83.6  
78.7  
77.8  
77.4  $\text{CDCl}_3$   
77.2  $\text{CDCl}_3$   
76.9  $\text{CDCl}_3$   
76.5  
72.8  
68.9  
66.3  
61.5  
53.8

30.6  
26.0  
24.3  
18.5

0.1  
-5.2

210 200 190 180 170 160 150 140 130 120 110 100 90 80 70 60 50 40 30 20 10 0 -10

f1 (ppm)

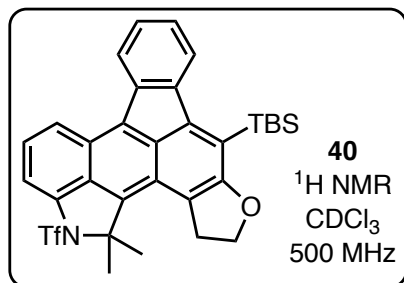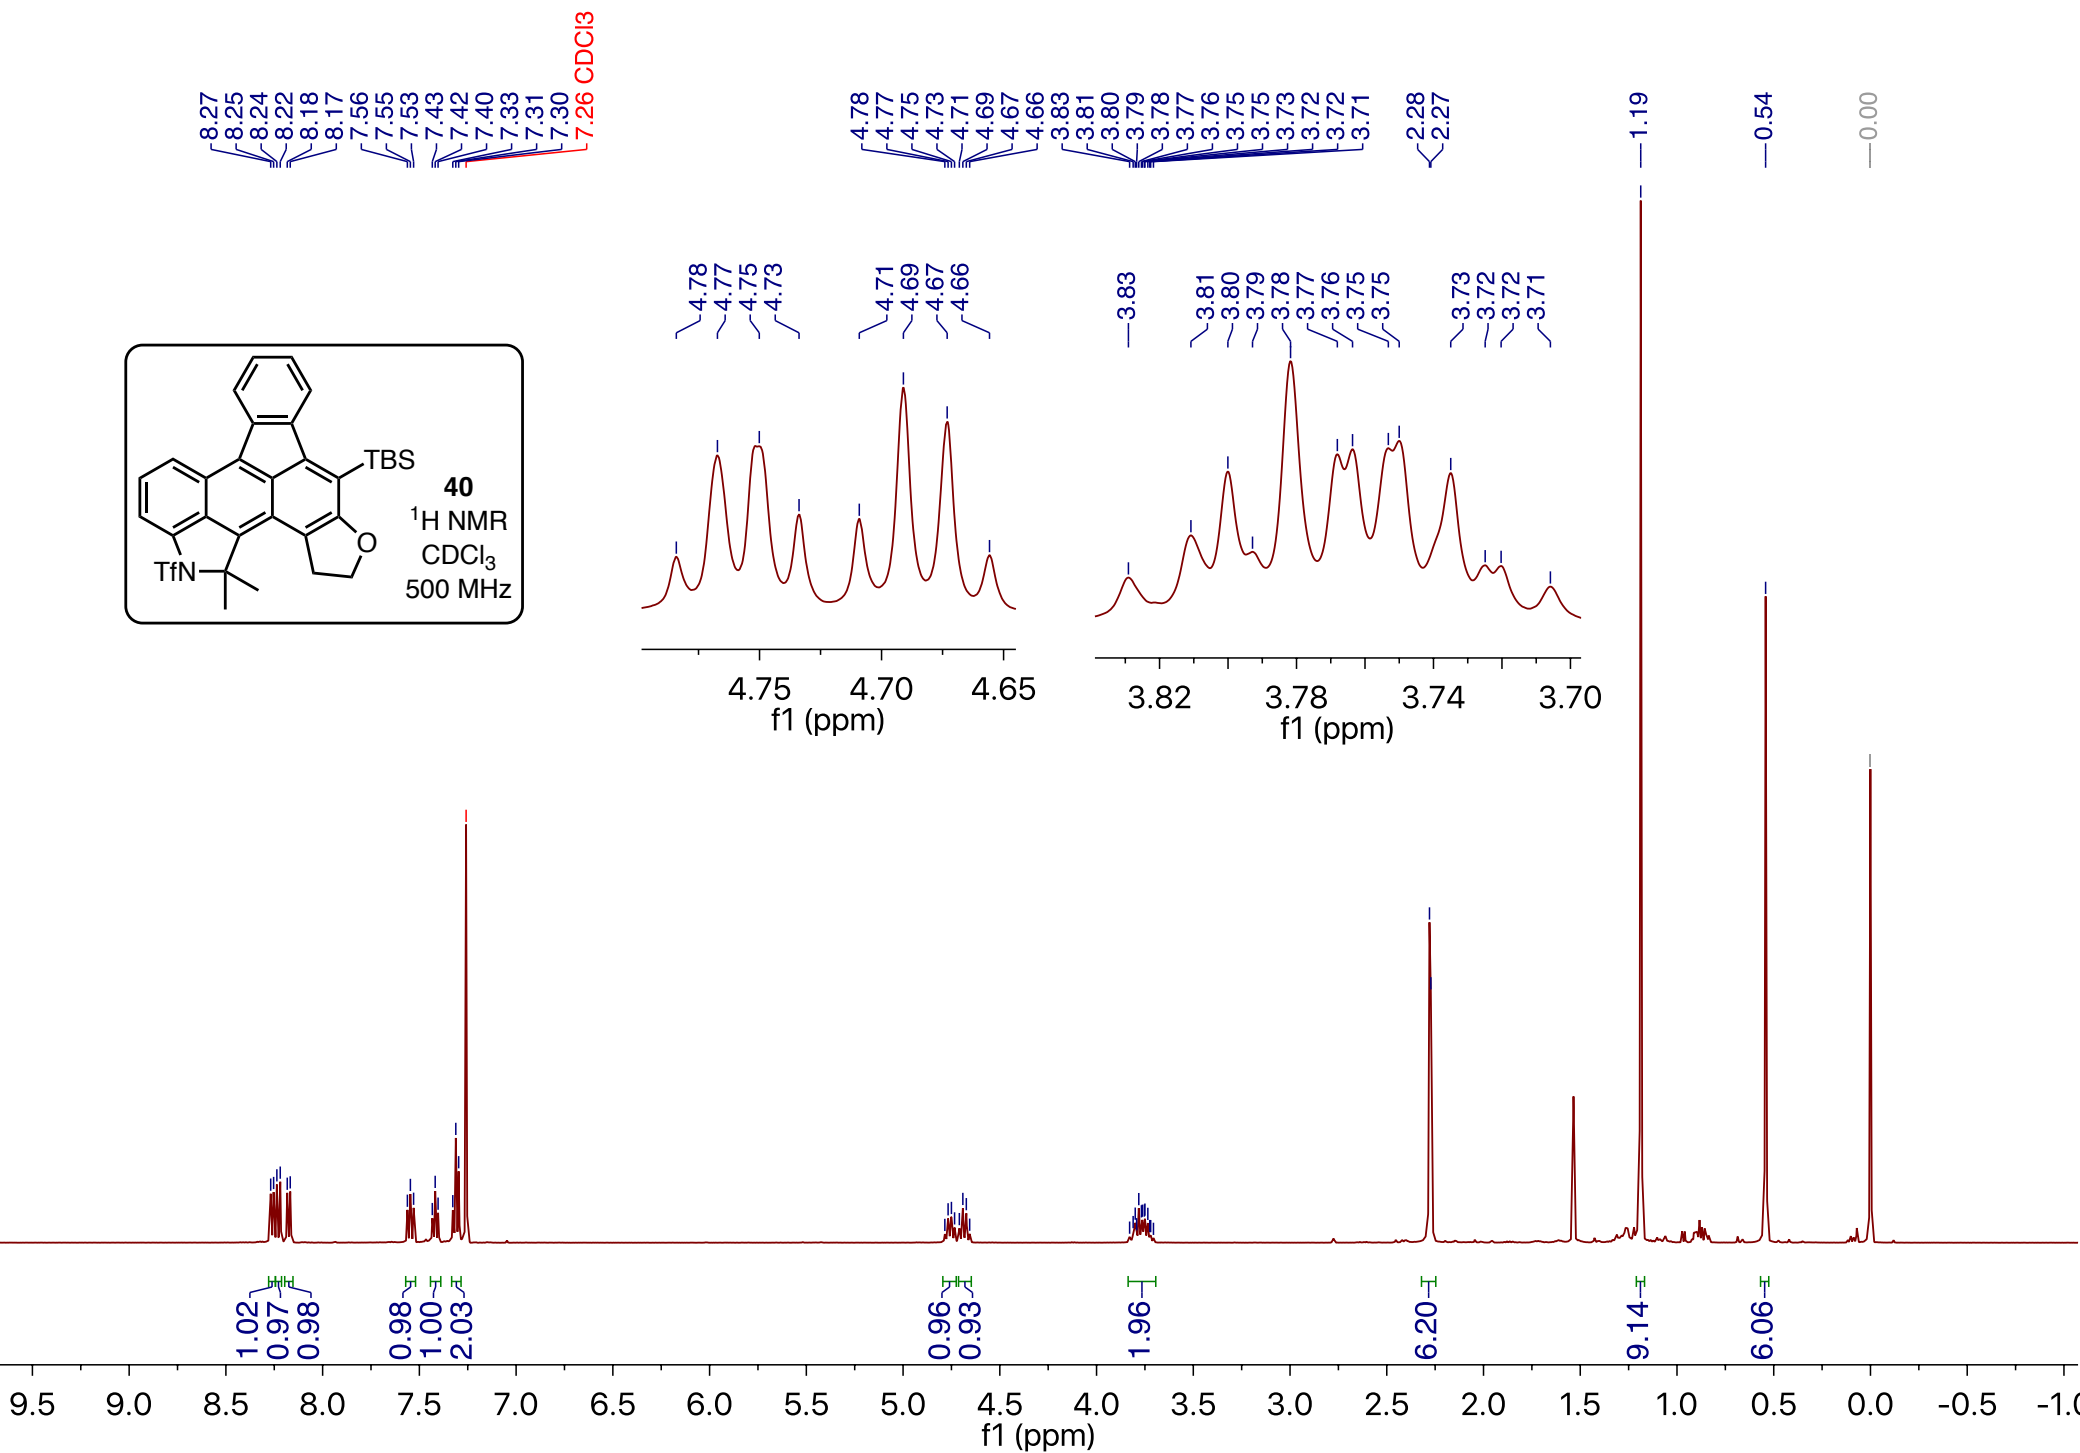

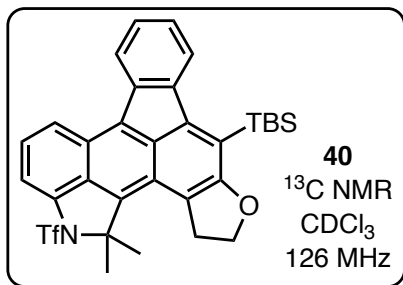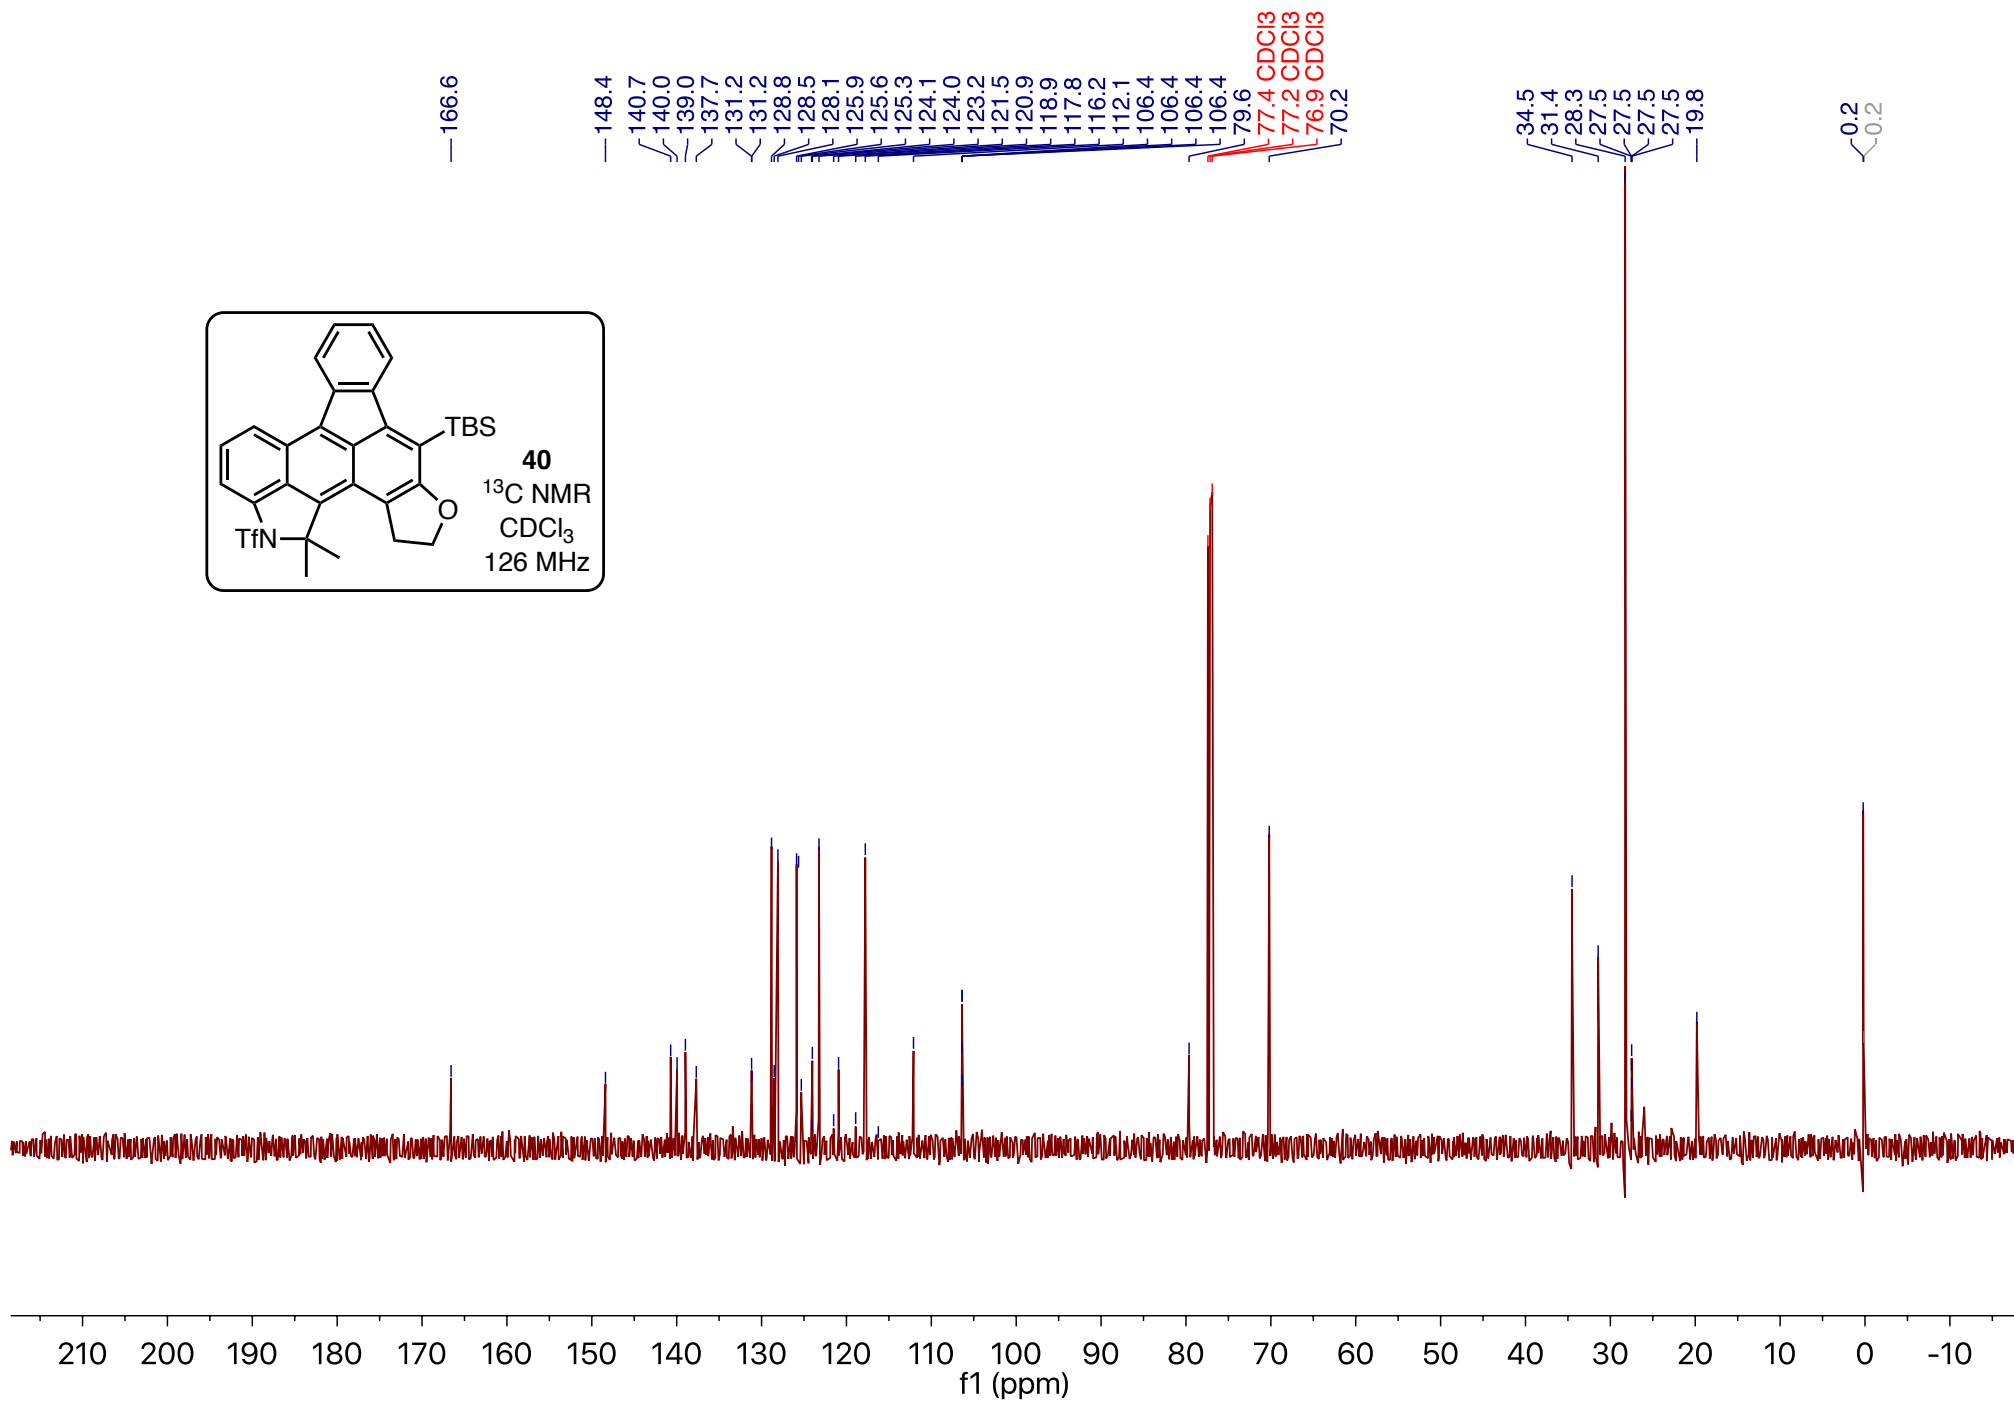

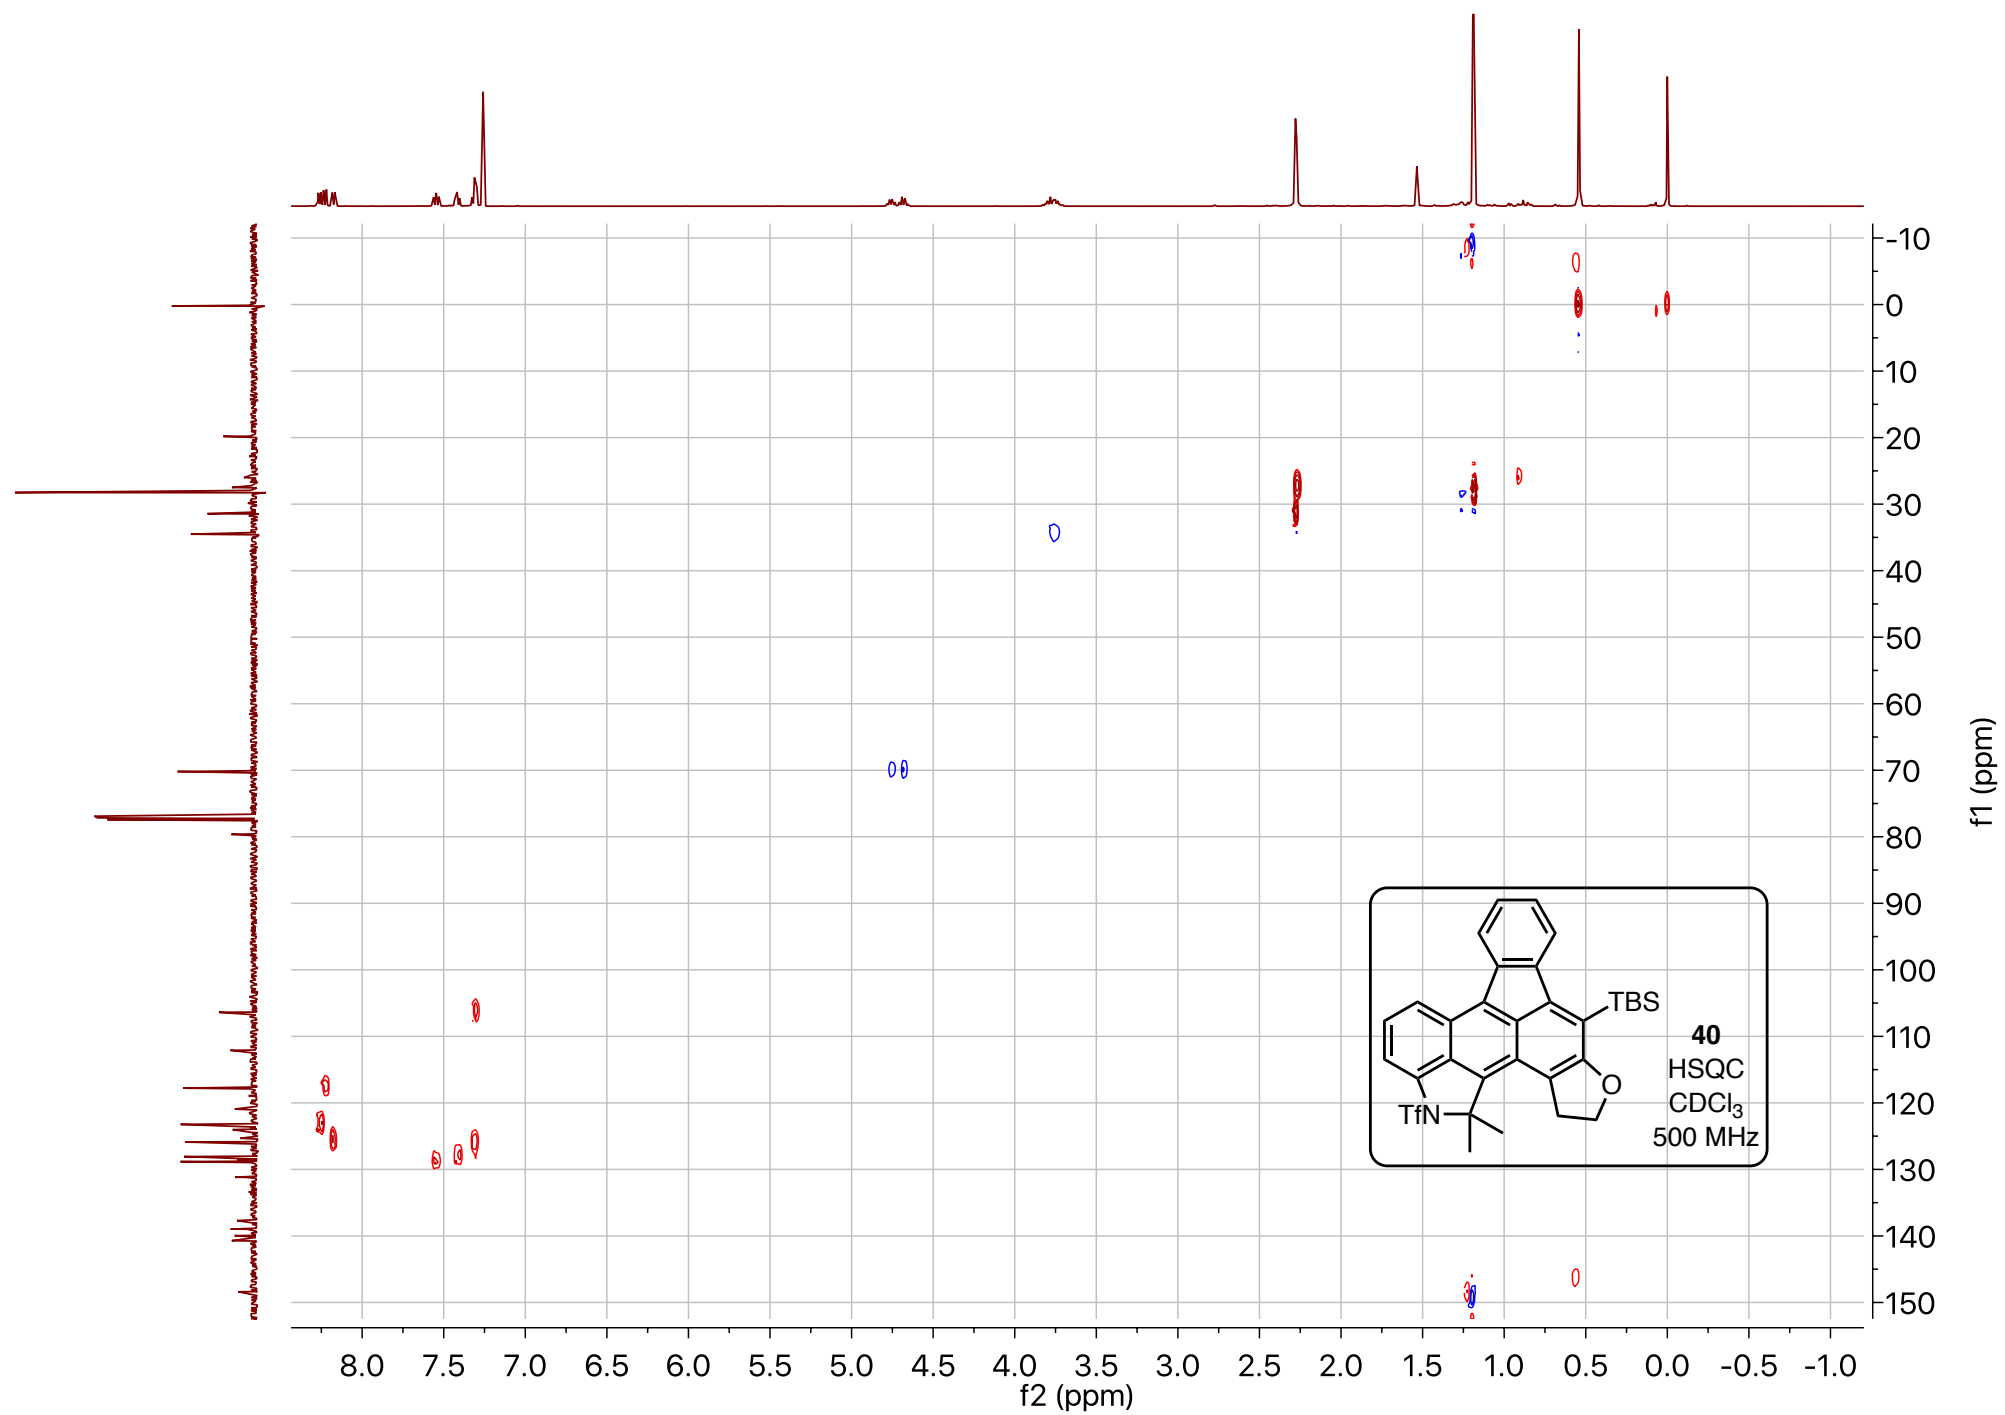



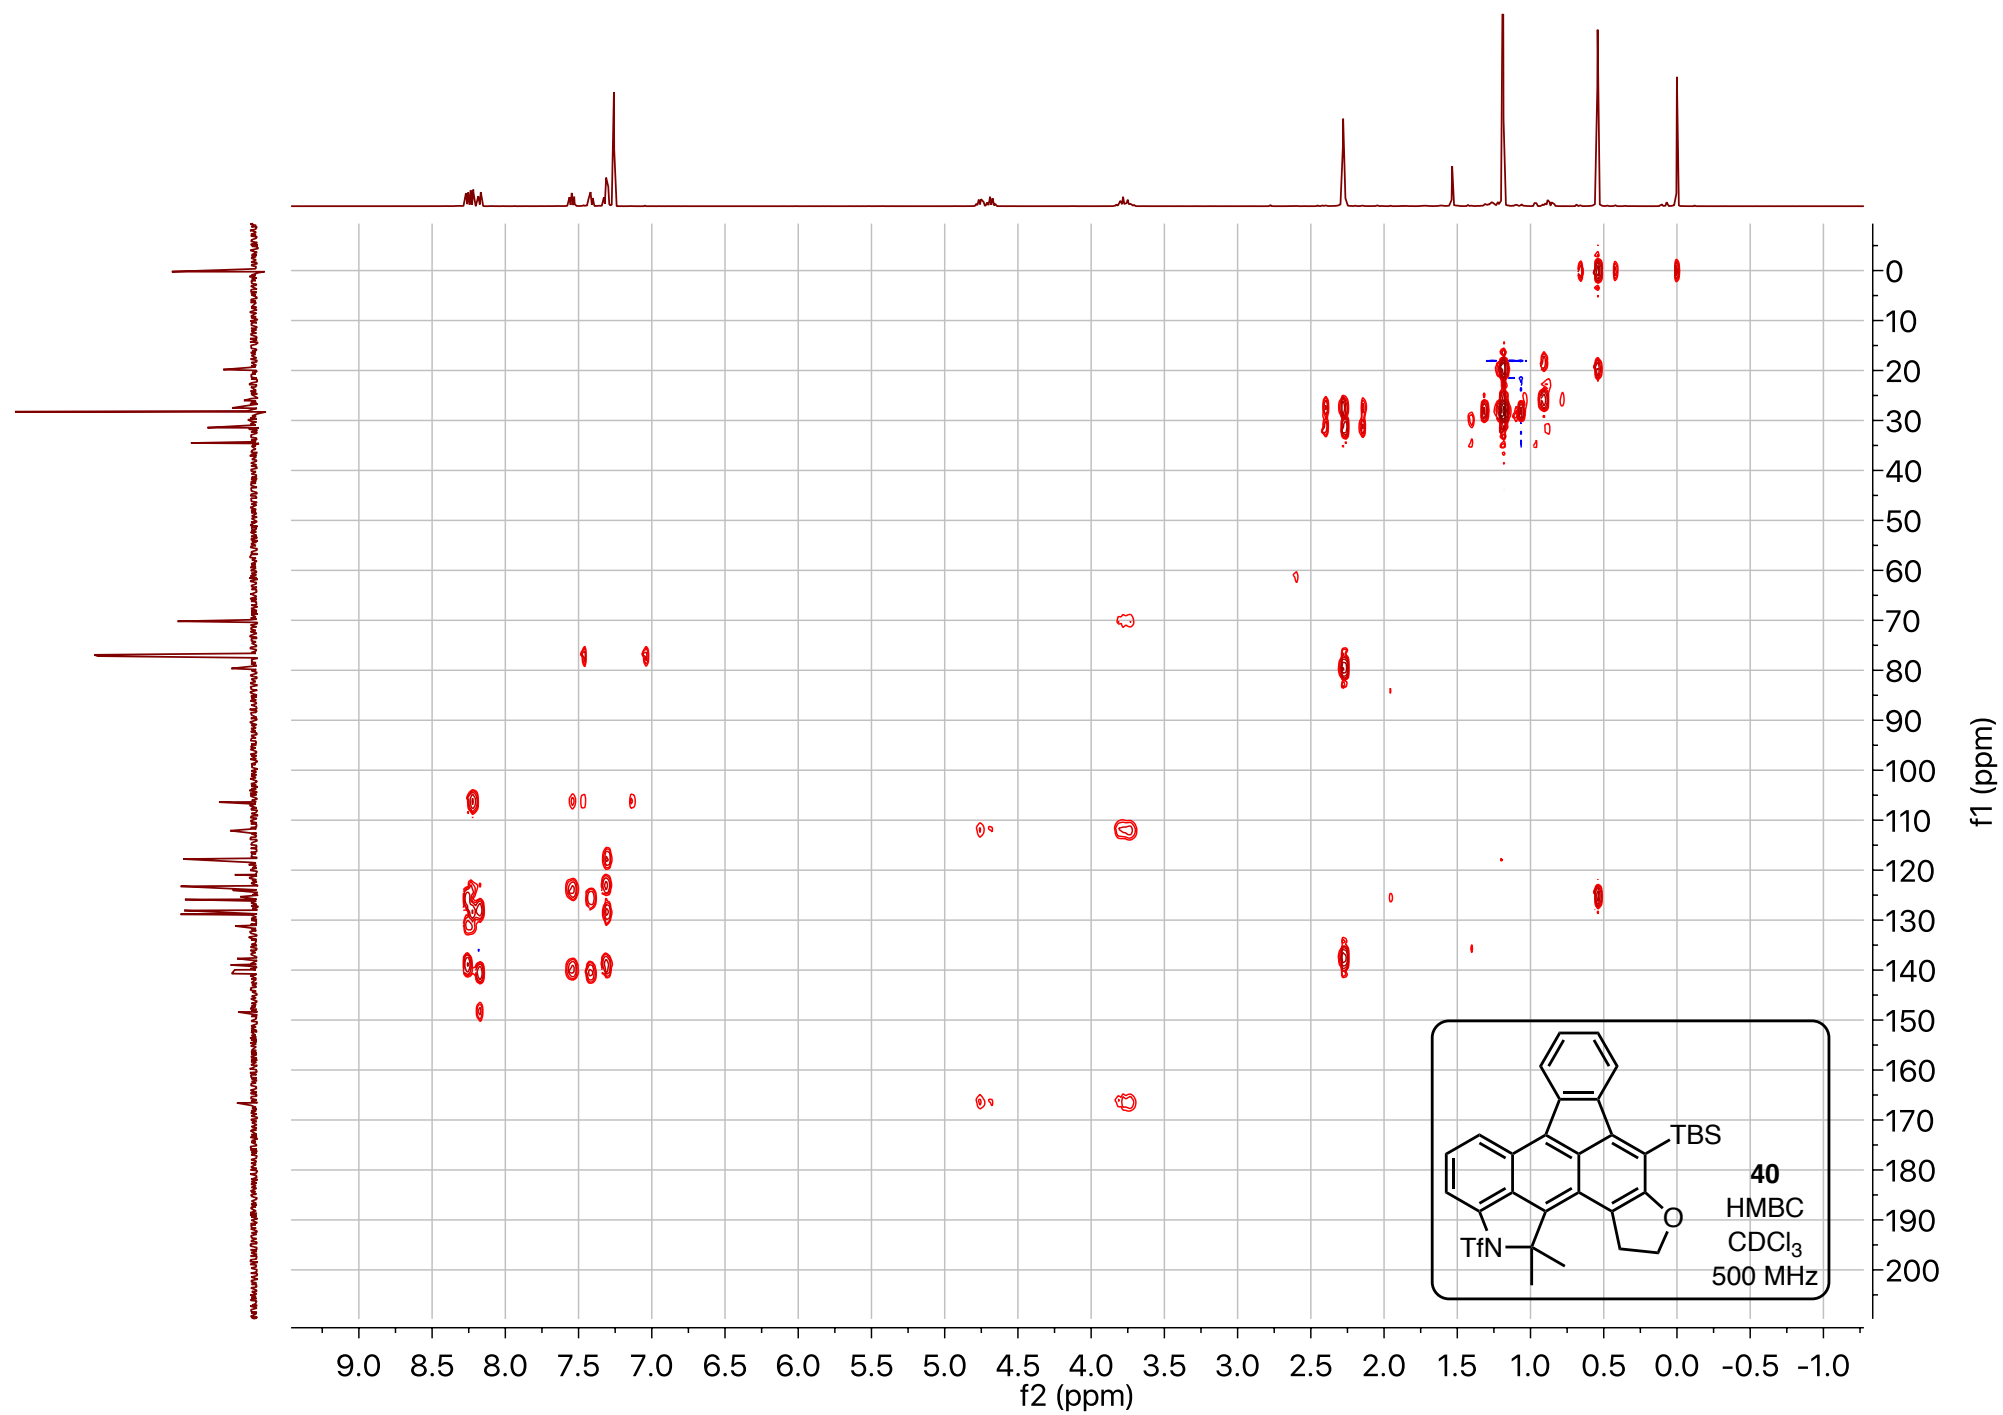



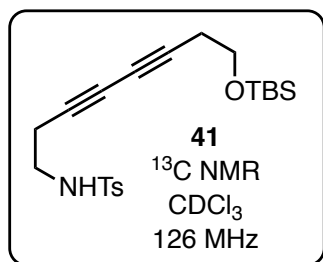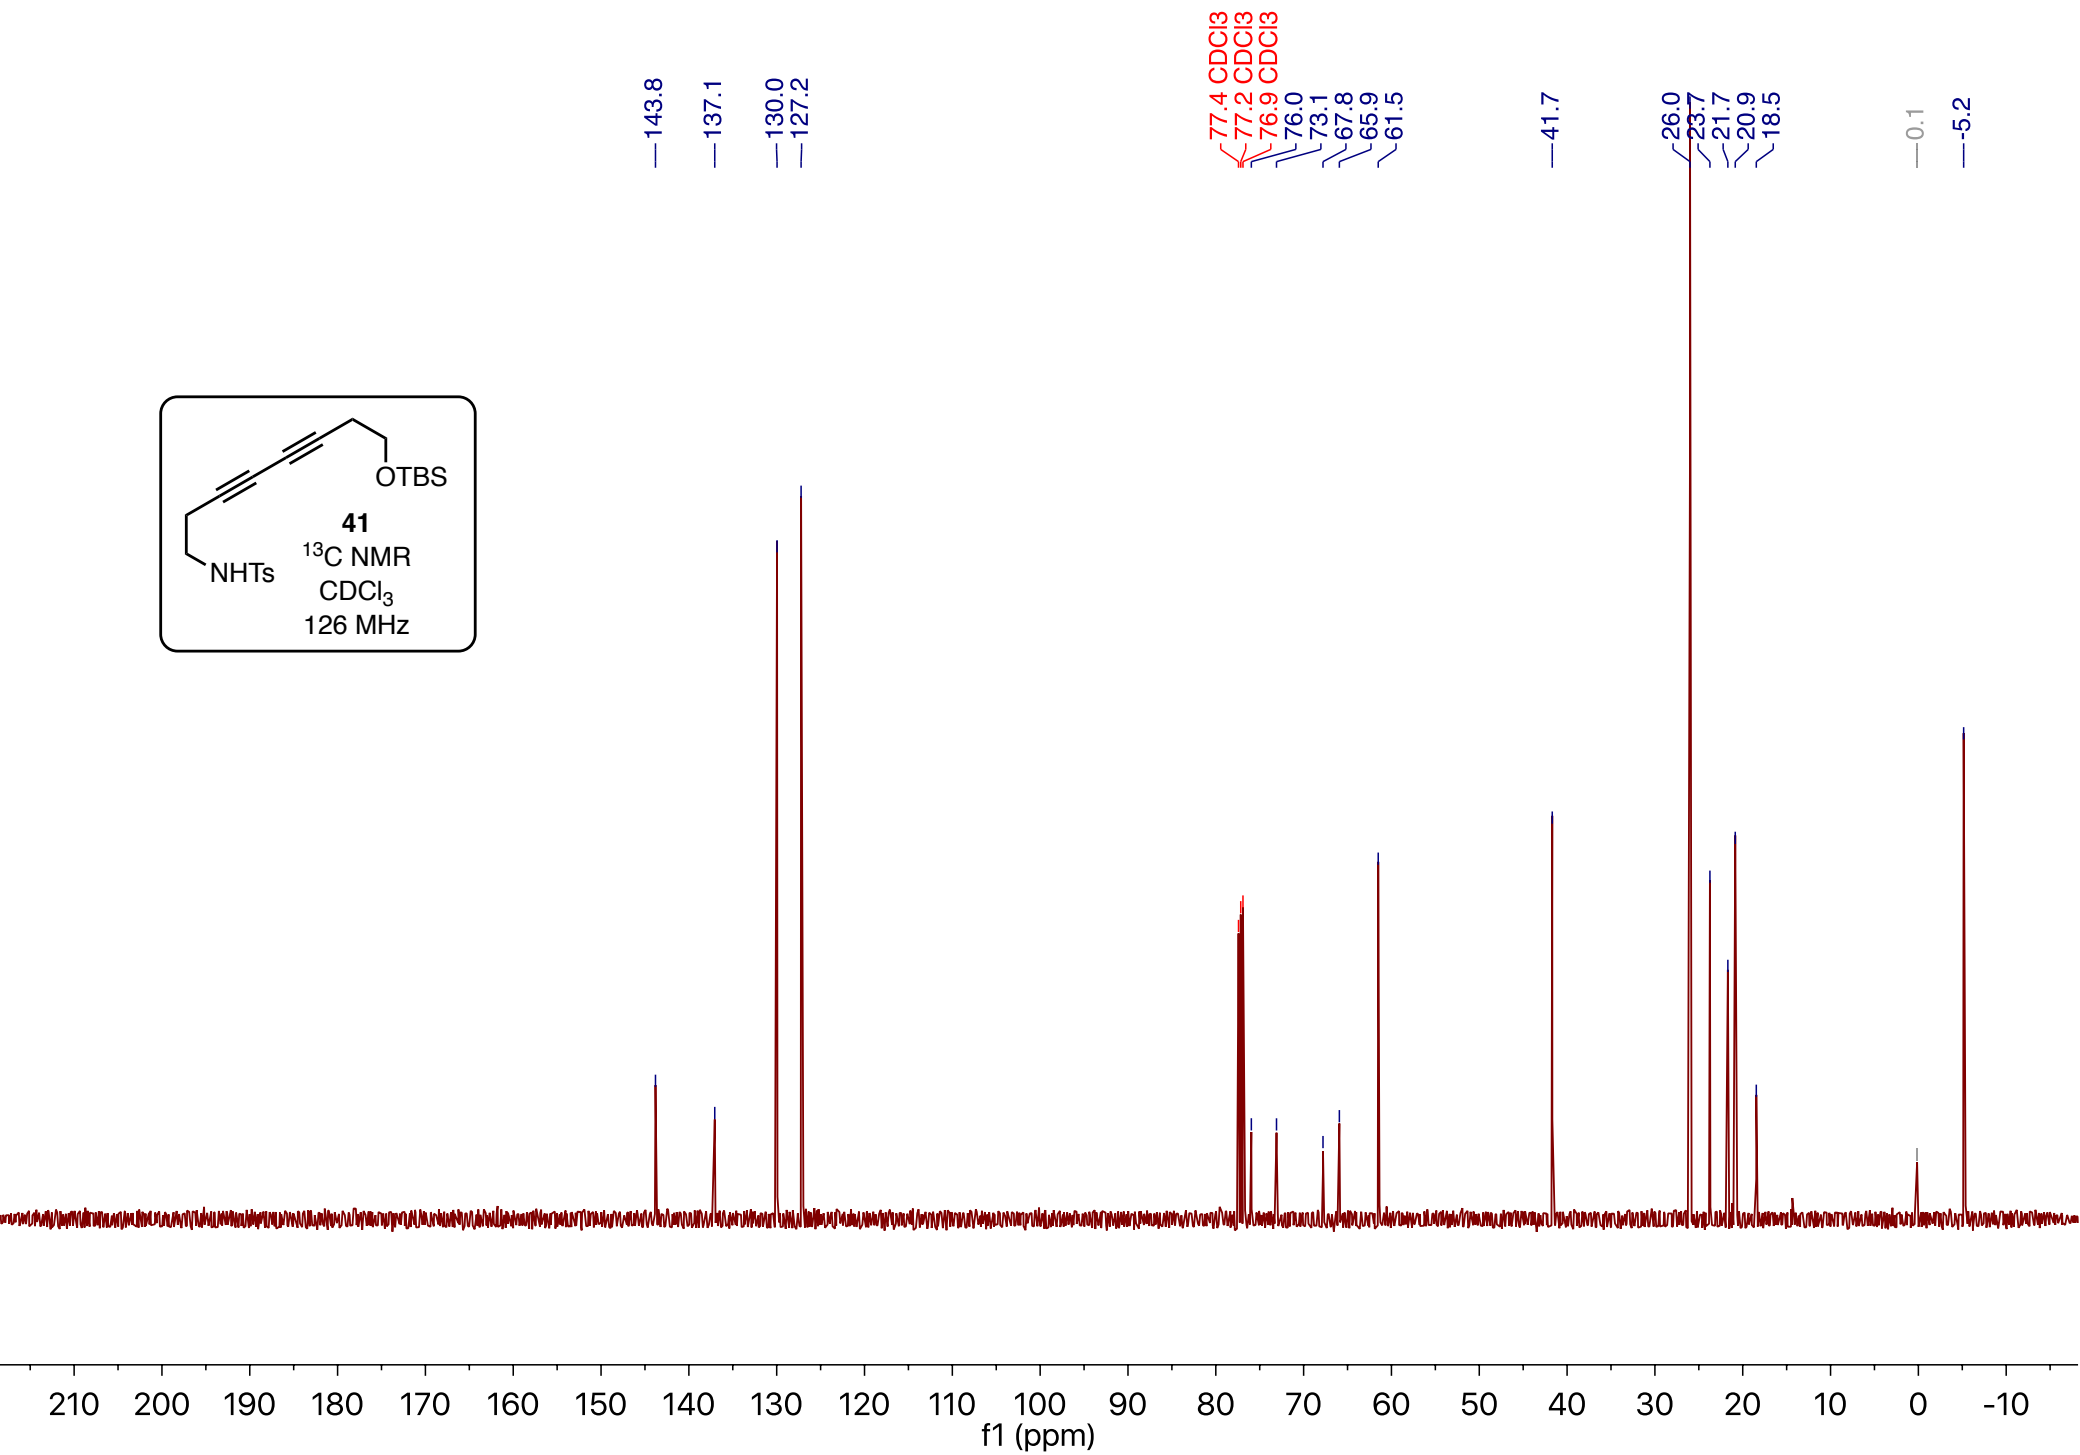

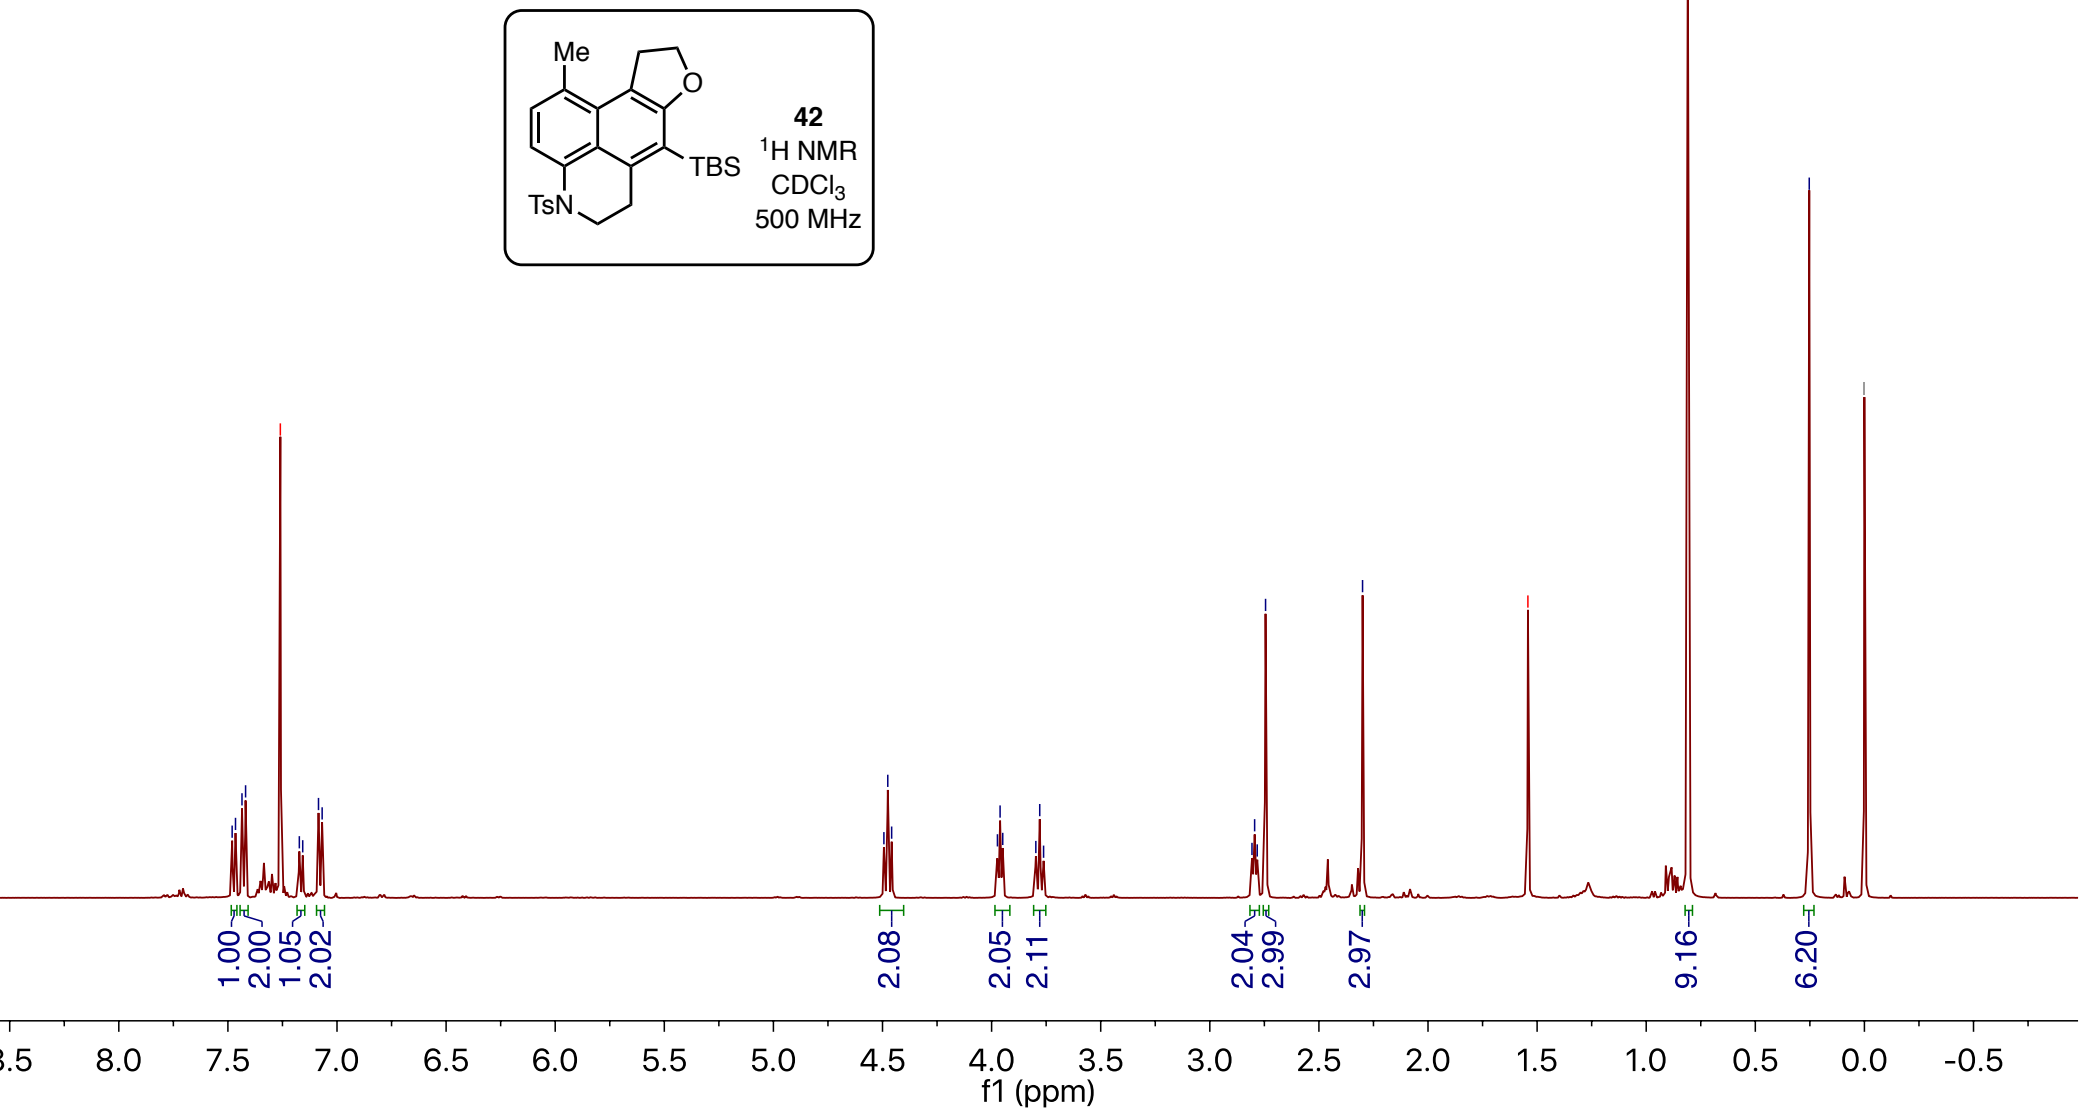

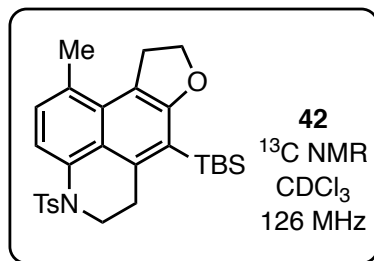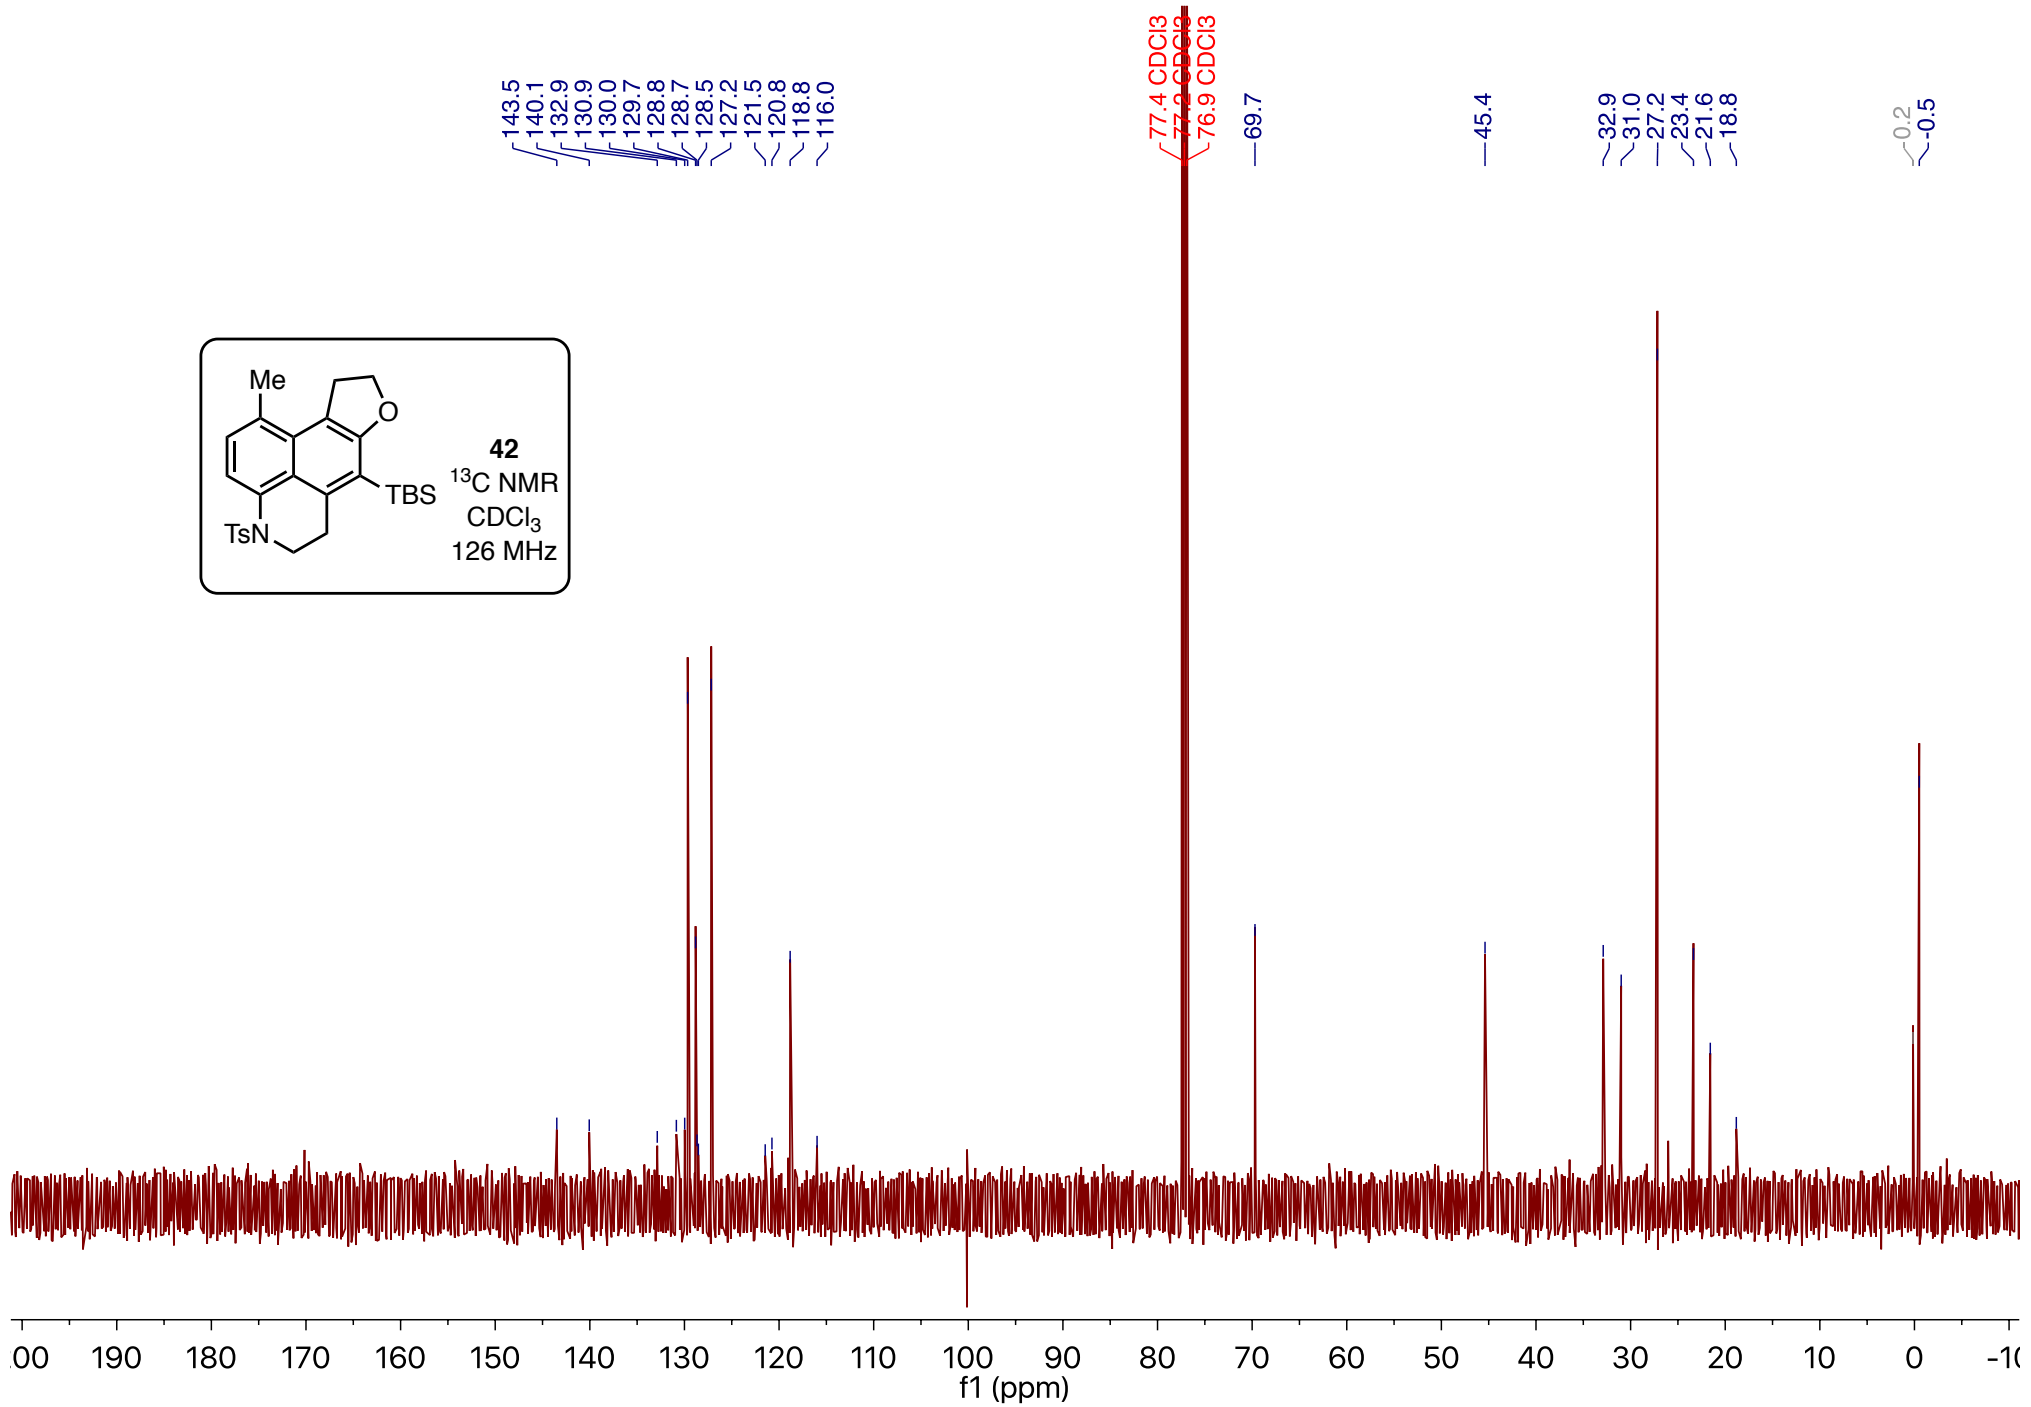

Supplement: NIHMS1062904-supplement-Supporting_Information.pdf [file NIHMS1062904-supplement-Supporting_Information.pdf]
